# Supplementary material for: Gibberellins Regulate Lateral Root Development that is Associated with Auxin and Cell Wall Metabolisms in Cucumber
Source: Research Square preprint supplement (doi:10.21203/rs.3.rs-105436/v1), 2020-11-17
Supplement: Supplementary file 1 [file 96bfa89e79ae6e3a0438b313.xlsx]

## Sheet: Additional file 5
Effects	geneID	pvalue	padj	Control_2DAG_Rep1	Control_2DAG_Rep2	GA_2DAG_Rep1	GA_2DAG_Rep2	GA_2DAG_Rep3	Control_3DAG_Rep1	Control_3DAG_Rep2	Control_3DAG_Rep3	GA_3DAG_Rep1	GA_3DAG_Rep2	GA_3DAG_Rep3	Control_5DAG_Rep1	Control_5DAG_Rep2	Control_5DAG_Rep3	GA_5DAG_Rep1	GA_5DAG_Rep2	GA_5DAG_Rep3
GT	Csa4G129600	1.8e-09	6.66e-08	0.856702	1.03627	2.7535	2.69879	2.65995	1.46474	1.61584	0.791851	3.22951	2.35666	1.56654	0.585087	1.09902	0.602886	2.49985	5.08306	3.10567
	Csa4G050280	2.65e-09	9.48e-08	1.032	1.23456	2.46503	1.83307	2.26091	2.02992	1.61703	0.70194	3.34182	2.67907	2.36692	0.716962	1.05815	1.06521	2.63369	3.34441	3.65684
	Csa6G301080	2.33e-11	1.23e-09	1.3236	1.25671	2.47776	2.21961	2.6703	1.2214	1.0207	0.63047	2.30687	1.78449	1.51772	1.03775	1.29557	0.83409	5.2946	3.64412	3.67916
	Csa4G022920	0.00344627	0.0210699	1.39822	1.47679	3.19803	1.97189	2.35432	2.06447	1.23285	1.54256	2.03922	1.4567	2.13679	1.34343	1.90839	1.50502	1.8528	3.19138	3.64268
	Csa5G511820	0.000857405	0.0067979	1.1175	0.738445	0	0	0.591654	4.92065	2.07261	1.72884	2.99176	0	0.195085	5.91289	7.85403	3.05728	2.54175	0.185226	0.445094
	Csa1G166260	6.31e-08	1.64e-06	0.570143	0	0.560187	2.37555	3.25078	0.105335	0.0406704	0.152661	0.758673	2.40126	1.24031	1.71364	1.1381	1.73625	12.3386	2.92227	3.14425
	Csa4G017070	0.000117246	0.00128124	0.692338	0.294105	1.06896	0.840356	1.98986	1.42529	0.733751	0.229519	0.855469	1.06371	3.5223	0.845371	1.06943	1.91003	3.32248	9.83614	4.84539
	Csa2G008050	8.28e-09	2.6e-07	2.12525	1.90751	1.4469	1.40407	1.78969	2.55219	1.97083	1.82517	1.26131	1.53796	1.50741	3.33061	2.94934	3.34477	1.66887	2.13021	1.79959
	Csa3G000690	2.54e-05	0.000341415	0.405885	1.87746	1.62842	1.36508	2.04148	0.893608	1.06645	0.549437	1.75533	2.24876	2.01941	0.578202	1.3166	1.89426	4.61592	4.27199	6.18356
	Csa4G279820	2.89e-06	4.96e-05	3.51409	4.61284	1.21312	1.10958	1.54204	3.34561	8.42578	3.52638	1.01707	0.928586	0.928485	1.31431	1.02693	0.244551	0.764381	0.72414	0.567422
	Csa6G365130	2.27e-05	0.000309185	1.06807	0.849922	1.41894	1.80541	1.40176	2.09558	0.920716	1.36146	3.86628	3.19164	3.08835	2.00216	1.93562	2.06263	2.40038	3.38109	2.06712
	Csa4G652880	6.84e-09	2.21e-07	1.35295	1.4975	1.99399	2.44278	2.76973	2.11217	1.00372	1.09887	3.59424	2.71173	2.52721	1.652	1.14593	1.32816	2.62752	2.35464	2.7213
	Csa1G044320	2.34e-07	5.27e-06	1.91785	2.87258	1.17249	0.678965	1.60207	2.66139	3.08273	2.10165	2.42241	1.1459	0.870491	3.27848	2.62669	3.70369	1.92382	1.3775	1.70597
	Csa2G223710	0.000148728	0.00155962	1.23677	1.9562	1.91325	2.96245	2.08979	1.80123	0.878481	0.732775	3.64163	2.13541	2.45306	1.86358	1.99168	1.01634	4.1712	2.69546	1.76078
	Csa3G217160	0.00398972	0.0236567	0.491701	0.324916	0.483115	1.04444	0.173552	0.934923	0.303982	0.427888	0.303779	0.160247	0	8.80566	10.6331	7.39862	2.32277	0.855744	0.636485
	Csa2G418920	0.00071524	0.00587709	1.72409	1.72445	2.75657	2.21397	2.30691	2.1269	0.799407	1.21846	2.67259	2.8503	2.01929	2.00949	2.18619	1.57395	2.63257	2.40045	2.30355
	Csa4G064690	1.65e-06	3.07e-05	0.338771	0.839472	2.08034	2.33869	2.36157	0.813651	0.471233	2.12915	4.95335	2.37374	3.01614	0.137884	0.488399	0.136296	6.40133	4.94131	1.85529
	Csa3G731160	8.34e-10	3.36e-08	1.22925	0.974747	3.38181	2.74166	5.3801	2.21429	1.02594	1.56892	4.50605	5.40835	3.56225	0.150096	0.575962	0.118694	0.731242	1.54849	0.636485
	Csa5G587230	0.00921772	0.0453139	3.80021	3.76677	1.46687	2.16219	1.86828	4.07467	2.5172	2.67711	0.838507	1.99046	1.13728	2.15438	2.20126	0.524203	2.27962	1.75468	0.648687
	Csa4G001730	2.15e-07	4.92e-06	2.33229	3.50844	1.53669	1.9525	1.53988	1.97705	2.7735	2.73797	1.83081	1.77059	1.52323	2.34526	2.49214	2.94087	1.72825	1.17337	1.77044
	Csa2G110220	1.13e-05	0.000166296	4.45979	2.14526	1.15992	2.3683	1.87507	3.93802	2.18951	1.59806	1.13454	1.79546	1.30523	3.04311	4.04214	1.83651	1.51468	0.717469	0.862031
	Csa6G484020	3.43e-05	0.000440538	1.35995	0.857806	2.18651	2.10089	2.48733	1.93008	1.37578	0.430347	2.29144	2.29665	2.71942	1.96247	0.935747	1.07439	3.76375	3.44265	4.87494
	Csa6G324840	0.00086003	0.0068106	1.68033	1.68384	2.2497	1.82385	2.38541	1.68527	1.52399	1.13553	2.48695	2.23865	2.72709	2.45759	1.87677	1.78296	2.03533	3.56254	2.78003
	Csa3G889880	9.73e-06	0.000145335	1.18123	0.72051	1.51771	1.59231	1.97239	1.20028	1.47457	1.21243	3.25592	2.44305	2.56969	2.05253	2.65267	1.97406	3.05233	3.43382	3.85427
	Csa4G000890	2.51e-11	1.31e-09	0.419336	0.789726	1.73046	2.27136	4.30708	1.35965	1.28326	1.8489	2.95341	4.55089	3.51381	0.512025	0.453411	0.850297	4.44606	2.41877	2.50528
	Csa5G593440	8.47e-09	2.65e-07	0.761484	1.04831	0.789753	0.0898611	0.492754	4.01345	3.45231	2.20886	0.627272	1.24085	0.753293	5.99205	6.17522	3.39044	0.93261	2.48225	1.81977
	Csa7G044930	0.00048888	0.00424713	0	0.426452	0	0.456943	0.455573	0.516668	1.86189	0.332802	1.77204	2.80433	1.35194	1.75113	0.9304	1.24629	7.22639	7.27383	7.88262
	Csa5G517170	2.89e-05	0.000381989	1.02438	1.47689	1.64698	2.27483	1.67635	1.45383	0.777228	1.08053	3.10683	2.18519	2.43856	2.16048	1.00693	1.61856	3.42159	5.74201	3.33821
	Csa3G640640	0.000213694	0.00213907	2.20008	2.39879	2.56998	3.01167	4.37454	1.84944	1.65485	1.9571	2.32581	2.65296	3.37985	0.805916	1.05727	1.06218	1.48839	1.9935	1.66493
	Csa2G381790	0.000132754	0.00142299	0.974794	1.25169	1.87201	1.74119	1.71251	2.1284	1.89011	1.20816	2.54583	3.2491	2.22771	1.56898	2.41942	2.1178	2.46523	3.87773	3.36193
	Csa5G341040	0.00712594	0.0373412	1.59912	1.76116	1.39662	1.6175	1.85455	1.46313	1.34169	0.971899	2.00727	1.71238	2.12695	2.07656	2.30542	2.74503	4.29	3.60978	3.76085
	Csa7G446960	0.00021475	0.00214739	2.0251	2.57538	1.80203	1.70441	2.02297	2.11072	2.76378	2.83739	1.93571	1.34488	1.2807	2.65935	2.10703	3.9477	2.36655	1.32998	1.82623
	Csa3G874390	0.00193676	0.0132231	1.1921	1.39644	1.93794	2.23292	2.11147	1.61377	1.48737	2.08735	3.77619	2.28867	1.92972	2.64654	1.38271	1.90449	3.2537	3.49195	1.94238
	Csa3G824170	1.47e-06	2.77e-05	1.31672	1.23988	2.16699	2.06271	1.63825	1.77889	1.19052	0.954864	2.96922	2.57475	2.48252	2.65281	1.67287	1.77996	3.38651	2.88085	3.97265
	Csa5G171710	3.41e-10	1.47e-08	1.17186	1.40123	2.65003	1.89652	3.68319	1.49662	1.56969	1.27337	2.84998	2.5279	3.1368	1.52173	1.22686	1.5985	2.38224	3.36674	3.06717
	Csa5G157380	2.35e-07	5.29e-06	2.68054	1.83084	1.08448	1.62681	1.28801	2.86737	1.62933	1.75113	2.03182	1.43153	1.43924	4.51075	3.19064	3.95855	1.89173	1.81454	1.80333
	Csa5G196580	0.00490653	0.0280128	3.35022	2.35947	2.79363	2.01317	1.8671	2.51452	2.41185	2.4551	2.66896	2.09032	1.75457	1.77624	2.19254	1.87284	1.57337	1.57822	1.58018
	Csa2G006170	0.00907466	0.0447747	2.48331	4.34257	1.09103	2.16571	3.97638	2.23057	1.74119	3.16248	1.52175	2.11213	2.30504	2.36661	1.8119	2.06643	1.03852	0.863374	1.59219
	Csa1G420860	0.000245911	0.00240353	1.24174	1.91459	1.15227	0.976897	1.21746	1.76733	2.00448	1.76095	1.30701	1.5513	1.63784	3.36935	4.62465	3.73022	2.6312	2.78997	3.21474
	Csa3G483820	2.24e-07	5.07e-06	0.878581	0.923627	1.22946	3.4497	2.17074	1.63057	0.962877	1.69902	3.48707	4.42515	2.03572	1.04027	1.61208	1.90234	2.96255	3.12431	3.62658
	Csa4G621160	0.000419445	0.00374281	1.98085	1.85202	2.29135	3.35714	2.4322	2.09198	1.03571	0.741673	2.95967	2.98747	1.72165	2.43585	1.79244	1.42433	3.06753	2.54278	2.45082
	Csa4G642290	6.49e-09	2.12e-07	1.36658	1.0743	2.43079	3.52842	3.26835	1.52793	1.22359	1.39427	2.62022	2.60314	2.07307	2.1002	1.12096	1.68356	2.81972	2.71814	3.68812
	Csa2G407830	1.18e-07	2.87e-06	2.11593	2.50511	1.27049	1.3109	1.61816	3.38799	3.48832	2.2505	1.45249	1.83891	1.97004	3.44484	2.98694	3.91595	1.11061	0.759882	1.82598
	Csa5G000020	0.000324435	0.00301788	2.78045	3.51025	1.35157	1.11905	1.85948	3.83108	3.2841	1.49421	1.66355	1.60247	1.56347	2.28718	2.08865	2.74128	1.13681	2.85248	2.0983
	Csa5G175870	5.3e-07	1.09e-05	0.673124	0.2224	2.97617	1.78726	4.81114	1.81878	0.72825	2.86375	4.15864	2.1389	4.05406	0.410955	0.424563	0.866609	2.88538	3.57025	2.88209
	Csa3G731810	1.38e-09	5.2e-08	0.642759	0.867544	1.45119	1.30721	1.28881	1.83938	0.824332	0.507772	4.25831	2.19283	2.24894	1.92034	1.81881	2.12601	4.96728	4.92339	4.18327
	Csa7G257340	3.47e-05	0.000445141	5.03203	2.17647	2.15745	2.72077	1.8407	1.92274	2.20593	5.30785	0.87613	2.03504	2.37182	1.87122	3.01725	1.76685	0.792368	0.454941	0.847241
	Csa3G853140	9.45e-10	3.74e-08	3.17687	5.53308	2.14038	1.01222	2.73921	4.85058	2.94603	2.7909	0.897237	0.843074	1.47363	3.93449	2.40452	1.84052	0.0952847	0.586745	0.162685
	Csa5G604350	0.00183796	0.0126929	2.23006	1.53652	1.22916	1.0687	1.29588	1.95955	1.48797	2.68219	1.88182	2.074	1.70915	3.2543	3.20523	4.75303	1.74151	2.5694	2.79464
	Csa6G517010	0.00149597	0.0107445	3.08736	1.8756	2.64204	3.91364	4.11281	2.03318	1.01591	0.808894	2.46117	3.01855	2.81654	0.851241	0.538426	1.73096	1.98642	2.6742	2.02302
	Csa3G608720	4.29e-05	0.000534899	2.45282	2.36553	1.23756	1.61937	1.12314	2.06986	2.5205	3.99978	2.04782	0.842595	1.59705	3.31877	2.22207	4.73681	1.18306	2.43933	1.90108
	Csa7G073410	3.19e-05	0.000414661	2.74567	1.99743	0.915741	1.73895	1.49368	2.20824	2.94327	3.01042	1.64962	1.82249	1.76776	2.86044	3.05049	3.16194	1.3486	2.60531	2.52828
	Csa3G750350	1.49e-05	0.000213012	1.44505	1.01218	2.2717	2.63975	1.57094	1.92044	1.62592	1.09543	3.16635	2.46776	3.229	2.84666	1.58331	1.89762	3.07437	3.29575	2.71661
	Csa1G569460	0.00223022	0.0149274	3.27577	1.97302	2.34078	2.86318	2.02477	3.29388	2.99414	1.56399	1.60743	2.20669	1.46111	1.87552	2.74544	2.6636	1.53018	1.74578	1.70425
	Csa7G390210	0.00240024	0.0158539	4.64082	3.29431	3.18587	2.21692	2.36048	2.84739	2.12362	1.26976	1.72781	1.50586	1.31607	1.73215	3.37451	1.44804	1.87212	1.95495	1.06546
	Csa2G416210	7.63e-39	4.55e-36	3.54504	3.03468	0.791621	0.68456	0.38391	4.88609	3.43688	2.15012	0.647095	0.787733	0.506345	5.3124	4.8785	4.55107	0.845786	1.0817	0.433217
	Csa3G892170	0.00174526	0.0121817	1.32558	1.37104	2.32174	2.38725	2.92934	1.38424	1.28271	2.74177	2.67053	2.76113	2.2638	1.93527	1.83837	2.11472	2.17808	3.43903	3.0301
	Csa3G516530	0.00118767	0.00888489	1.96602	0.951699	2.56061	4.22466	4.84137	1.04322	1.99276	1.85676	2.20329	3.48679	2.49029	2.00979	0.790988	1.32443	2.06386	2.04615	2.13064
	Csa3G133170	2.74e-06	4.75e-05	2.33847	3.10361	1.79138	2.06267	2.64405	2.54645	2.2972	1.9775	1.90999	1.14317	1.5153	4.50082	3.72846	2.62156	1.01938	1.14309	1.65757
	Csa5G642710	1.44e-08	4.32e-07	2.39021	2.14567	1.32933	0.81426	1.28936	2.76206	3.38754	2.93033	1.11449	0.705492	0.99199	3.79961	2.7795	5.57391	1.13623	2.33222	2.69436
	Csa4G293020	0.000982311	0.0076176	0.624066	1.56463	1.87557	2.22234	1.78809	1.6752	1.63404	1.78895	2.40405	3.08668	2.57622	1.79296	2.46096	1.59508	2.00391	3.21269	5.87775
	Csa7G047360	8.25e-07	1.64e-05	0.66382	0.411236	2.52739	1.18973	5.71114	1.24558	0.692535	1.82929	4.66507	2.79892	4.25876	0.81055	0.942064	1.72262	1.52437	4.2911	2.92488
	Csa1G570240	1.64e-44	1.49e-41	2.6137	3.17642	0.982564	0.772435	0.69792	3.38441	2.90855	3.90291	1.01099	0.977738	1.11888	3.91297	4.74293	4.49885	0.906639	1.33357	1.3307
	Csa4G645880	0.000476569	0.00416294	3.27013	2.22599	1.89685	2.09223	2.48229	2.01084	2.04604	3.06287	1.84994	1.94531	1.65072	2.66998	2.93945	2.49182	1.90255	2.35095	1.78894
	Csa4G050170	5.62e-06	8.96e-05	1.39313	1.7775	1.84933	2.70735	3.29557	2.56287	1.86913	0.877001	3.73576	3.3907	1.94044	1.39342	1.42621	1.28794	3.32942	3.02149	2.88652
	Csa1G630860	6.06e-05	0.000723474	2.33307	2.13848	1.67611	1.81179	2.01887	2.86201	2.79168	4.54085	1.73588	1.76599	2.75906	3.12446	1.98015	3.29438	0.921734	1.89611	1.1091
	Csa2G351650	0.00144849	0.0104626	1.15345	2.57243	2.60662	1.59256	1.9542	1.59294	1.4975	1.5391	3.77688	2.98853	1.63103	1.54925	1.49662	1.50357	3.26931	4.1296	3.92799
	Csa6G216410	0.00797856	0.0406909	0.047331	2.25189	1.16261	0.150806	0.350827	0.170518	0.0438918	0	1.7545	2.73029	1.88389	0	0.204709	0.137106	3.03087	7.48423	17.532
	Csa7G452890	0.00368746	0.0222232	2.15759	1.86675	2.15585	2.23326	1.51019	2.76669	1.88213	3.2672	2.2593	2.44917	1.57046	3.12568	2.98535	2.78955	2.09221	1.81841	2.11926
	Csa1G595820	3.16e-11	1.62e-09	1.77575	1.96128	1.09669	1.29324	0.698402	2.13247	3.34049	2.53134	0.689593	0.892888	0.850277	4.21261	4.27896	9.16103	1.65108	1.1605	1.45496
	Csa4G629470	0.000652853	0.00544423	2.8157	2.8579	2.50094	1.93782	2.09898	2.46161	2.10977	2.69204	1.80915	1.872	3.02004	2.72295	3.31242	2.39253	1.74985	1.65772	1.31885
	Csa5G141190	3.35e-06	5.69e-05	1.20523	2.11142	2.64376	2.47077	3.02726	1.34637	1.71547	0.585384	3.94814	1.78125	2.40736	1.74542	1.75776	1.70503	3.6485	4.40416	2.98068
	Csa5G198160	0.00184756	0.0127464	3.47083	3.08192	2.59319	3.03349	2.48843	3.12606	2.41398	2.72674	1.96563	2.12092	2.76447	1.67755	2.61919	1.67569	1.32838	1.04271	1.42561
	Csa5G650500	0.000377393	0.00341586	2.03468	2.06848	2.25545	3.13987	2.55961	2.13016	1.51592	1.33175	2.64302	2.12535	2.13119	2.20837	2.27523	1.89748	3.63291	2.80175	2.90913
	Csa3G696880	0.00366437	0.0221126	1.09986	1.02605	1.14422	1.64912	2.26074	2.02006	0.959944	1.35123	2.95785	3.16278	2.16853	3.23892	2.1686	2.68624	2.64877	5.66207	3.55607
	Csa7G343340	1.08e-10	5.06e-09	1.25045	0.819292	2.91535	1.95833	3.38875	2.13794	1.47405	1.57384	4.5305	2.40371	3.90708	1.16454	1.23748	0.839047	2.29162	4.80566	3.11489
	Csa7G450590	0.00104305	0.0080239	1.32155	4.6575	0.721375	1.71549	1.71034	1.76337	1.63404	5.62242	1.08863	1.7228	1.69185	3.94451	2.54034	4.96248	0.770733	2.19047	1.93001
	Csa6G504680	2.19e-19	3.27e-17	5.37798	3.95005	2.22387	2.09569	2.04844	3.04332	3.83908	3.5016	1.50592	1.64553	1.2563	1.7716	3.36768	2.20417	1.03571	0.692599	0.624113
	Csa1G118870	0.00305324	0.0191899	0.460735	0.869866	1.16406	0.489333	1.57975	3.13531	1.11901	1.50194	5.28631	3.88259	4.32033	1.58057	2.53832	2.754	2.16497	4.97475	2.62154
	Csa4G083480	0.00985703	0.0476098	3.05918	1.67742	2.17438	2.62691	2.55011	2.50127	2.2333	3.85164	2.09107	2.35462	1.97712	3.6559	2.67437	2.7025	1.22991	1.8772	1.4777
	Csa4G309180	8.7e-33	3.69e-30	6.50649	7.85511	0.464534	0.78907	0.810544	3.83919	3.06905	5.17227	0.306004	0.968529	0.872524	3.51874	2.02049	3.17388	0.330879	0.738869	0.376618
	Csa2G367230	0.00145218	0.0104853	1.36781	1.64336	3.13583	3.52172	3.64283	2.23989	0.884053	1.87562	3.3802	2.7557	3.25612	2.58114	1.12042	2.40133	2.48016	2.30837	2.27821
	Csa3G860320	0.00675408	0.0358856	2.34763	2.89683	3.29519	2.39158	2.73953	2.41649	2.88792	2.55716	1.83519	1.68635	1.70623	2.28153	2.69381	3.65468	1.91121	1.57236	2.06092
	Csa3G813290	0.00772415	0.0396799	2.31011	1.98243	2.3764	2.61816	1.72379	2.01082	1.50964	1.18729	3.37167	2.71338	2.07866	2.13921	2.98399	1.99107	3.95499	3.16086	2.83441
	Csa3G118010	5.31e-06	8.53e-05	2.9208	3.90608	2.0043	2.3635	1.8164	1.72594	2.5366	5.27175	1.77586	1.76782	1.7482	2.43421	2.9075	3.53653	1.21673	1.47542	1.55112
	Csa7G398170	4.05e-08	1.09e-06	0.414488	0.082168	0.4887	2.37716	3.68672	0	0.153748	1.3466	2.25347	2.99885	6.85955	0.708548	0.717071	1.4408	3.65497	4.61673	9.21191
	Csa5G637680	5.73e-05	0.000691392	2.34949	1.45318	2.71475	2.21585	2.12959	2.32489	1.15039	1.0032	3.11211	2.99545	3.05156	2.2721	1.80877	1.97824	3.19647	4.44882	2.80736
	Csa6G410650	1.01e-47	1.14e-44	5.31451	5.04965	1.33037	0.916763	1.12908	4.30896	3.78259	3.39741	0.481003	0.744659	0.567297	4.19526	4.42873	4.51058	0.35535	0.252482	0.283131
	Csa1G528550	0.00484812	0.0277624	1.06098	2.36083	2.87207	2.82859	3.6455	3.2503	1.48587	0.577839	3.29081	2.22286	2.51745	1.85071	1.61544	2.29982	3.06858	3.23004	2.89771
	Csa1G366990	0.000312173	0.00292666	4.8625	2.50136	2.93308	2.68021	1.49903	2.36529	3.53885	2.53529	2.05344	1.50447	1.67623	2.48013	2.99485	2.19899	2.00302	2.32606	1.17673
	Csa4G192030	0.00268422	0.0173451	0.444199	0.880579	2.05751	1.68489	2.68775	2.13373	1.82423	1.76709	2.82272	3.84665	0.864072	1.62715	1.57811	3.24747	5.19597	3.1554	5.53512
	Csa2G418850	0.00577942	0.031898	1.84139	2.39247	1.98038	2.43139	2.74029	2.15154	1.61529	1.64572	3.35141	3.21144	2.81491	2.49148	2.20627	2.16245	2.74281	2.54892	3.0625
	Csa4G279910	6.63e-09	2.15e-07	2.01427	2.40033	4.46964	5.19199	3.59474	2.06559	1.0284	0.81406	3.2719	2.47831	3.53216	1.13303	1.68852	0.677452	2.28082	2.16074	2.81245
	Csa3G607120	5.4e-06	8.65e-05	1.56321	1.70792	2.46095	2.05643	2.63337	2.00524	1.10369	0.948114	2.96316	2.74412	2.73514	2.19071	2.6506	2.24696	2.64799	5.38815	3.62958
	Csa7G044840	4.64e-06	7.56e-05	0.257937	1.2272	1.8754	0.986209	4.26076	1.67267	1.43517	1.97526	4.14327	1.81575	6.26799	1.07083	1.11559	0.398495	2.65358	6.66947	3.88337
	Csa2G378530	1.06e-07	2.62e-06	1.42574	1.08068	2.22487	2.9394	3.01939	1.71216	1.32215	0.681174	4.14513	3.60791	2.54752	2.35531	1.81365	0.566865	5.01833	3.75327	3.60761
	Csa3G782760	0.00356426	0.0216455	2.50443	1.96368	3.12178	2.46138	2.77065	2.7831	1.31721	0.954167	3.46403	2.66789	2.62323	1.9626	2.42502	1.62419	3.61006	3.49435	2.14388
	Csa6G135420	0.00544798	0.0304299	1.32293	1.56784	2.54314	1.80212	2.46667	2.72839	2.32025	1.56835	3.26928	2.41817	2.16889	2.3879	2.30112	2.30486	2.98886	4.54757	3.47075
	Csa4G561180	0.000786215	0.00632855	3.70551	2.35329	4.01142	4.12404	3.19536	2.26492	1.60496	1.77643	2.90619	3.12396	2.85867	1.43594	1.39152	1.32835	2.6321	2.07426	1.53775
	Csa3G848160	9.73e-06	0.000145335	2.13836	2.09128	1.51274	1.75631	0.996284	1.88315	2.90838	2.64654	2.25469	2.03495	1.91129	4.63021	5.30248	3.71658	2.27471	1.78635	2.48695
	Csa4G194780	6.96e-08	1.79e-06	0.326433	1.00304	1.89232	0.936075	0.587614	1.37203	1.15031	0.795392	3.54947	3.09583	2.49599	0.637739	1.41184	1.63903	6.61368	7.33681	7.52794
	Csa3G120370	4.13e-09	1.41e-07	1.32721	1.75404	2.06473	2.93665	4.13803	1.10683	1.33334	1.71106	2.77878	3.46036	2.54864	1.57556	1.15602	0.854356	5.34084	3.33645	5.0219
	Csa3G778270	7.81e-10	3.17e-08	5.76567	4.61136	1.83624	1.26694	2.52628	2.10105	4.64613	4.52143	0.884384	1.08856	2.08247	2.9617	2.23571	3.30194	0.375679	1.50269	0.902735
	Csa1G160590	3.11e-05	0.000404464	1.33273	0.775367	2.8751	1.66161	2.88376	2.26151	1.04782	2.28591	3.50829	2.52106	4.09679	2.79472	1.4097	1.28686	2.98058	6.05072	2.83871
	Csa1G616240	5.89e-07	1.2e-05	4.73063	2.66532	1.71243	2.8559	1.74004	2.93018	2.40125	4.10225	1.53823	1.4119	2.19064	2.61453	3.39208	3.51001	1.8296	1.3371	1.66601
	Csa7G291130	0.00157091	0.0111609	0.973791	2.89566	3.10231	1.25362	6.28054	3.083	0.985128	2.15705	4.0108	3.37558	2.84359	0.288251	0.542414	0.227946	2.3233	4.49002	3.84329
	Csa2G349650	0.00350701	0.0213591	2.9508	2.39304	2.75735	3.46269	2.97161	2.67627	1.26295	1.31684	3.59508	3.10696	2.57204	2.5196	1.85188	1.13571	2.94601	2.5857	2.61357
	Csa3G585890	3.23e-07	7.03e-06	1.49388	1.85765	3.14909	3.46169	4.05529	2.05493	2.41804	2.30062	3.32258	3.61164	2.78809	1.22711	1.58591	1.46869	3.0224	2.40408	2.53147
	Csa4G615240	2.58e-18	3.42e-16	1.41062	1.13854	2.55417	2.39708	2.88067	1.74239	1.06518	0.958657	4.23299	4.07843	3.77826	1.50096	1.19841	1.01182	2.81355	5.13046	4.91209
	Csa2G277650	0.000749542	0.00607605	1.8377	0.428595	4.14229	4.01835	3.89183	0.778897	2.00491	0.250856	1.60285	2.11382	2.71747	2.11191	2.33769	1.98321	2.38308	3.65519	6.58751
	Csa7G073510	0.00185795	0.0127949	0.720909	3.7729	3.65493	1.56194	2.0458	1.48906	1.9521	0.836466	2.52979	3.43963	2.44654	0.915468	1.34072	1.53141	4.35908	4.93258	5.37514
	Csa1G033160	6.73e-05	0.000794867	1.59717	1.38523	2.84433	2.38544	1.32127	1.43852	1.61998	2.43231	3.94701	2.78156	2.66624	1.40171	2.21267	1.83137	3.92967	5.26154	3.93614
	Csa4G003090	2.06e-12	1.26e-10	4.54798	6.58161	2.50239	1.8355	2.31158	3.0585	4.13316	4.22159	0.899134	0.711458	0.857467	3.99834	3.14723	1.66875	1.14583	1.08551	0.326058
	Csa3G119730	0.00108465	0.00825679	1.23956	1.76478	1.92651	1.43618	2.60123	1.78628	1.73468	1.54285	3.0911	2.62217	2.12458	1.29339	2.46125	3.3513	4.6135	5.64818	3.85092
	Csa3G106000	0.000120016	0.00130851	3.03941	3.2174	1.68162	1.72372	2.2185	3.36649	3.42058	2.9103	2.58879	2.01958	2.37996	2.73838	2.23347	3.53316	1.08421	2.5238	2.46817
	Csa5G027940	0.00257783	0.0167656	0	1.55186	1.35371	1.13072	2.25466	2.55702	1.50996	1.23529	3.94647	3.6738	2.23027	3.28814	1.69287	0.907054	4.01028	4.35969	7.70752
	Csa1G077190	0.00174297	0.0121746	1.49909	1.78307	2.94582	2.22899	3.4922	0.900119	1.11213	2.08726	2.68585	4.17718	3.68996	1.28131	1.783	3.54636	2.75396	2.38535	5.28414
	Csa4G038740	0.00567715	0.0314611	0.51487	2.80686	3.54116	1.50378	1.97631	1.8549	1.64127	1.86688	3.26045	1.63603	2.49423	1.65027	1.91369	1.33609	3.44564	5.12039	7.11336
	Csa3G183990	0.00330088	0.0203638	1.65039	2.11534	1.7334	1.51106	2.13927	2.32364	1.89989	1.28763	1.72282	1.00155	1.16238	3.78716	5.32273	7.61074	3.49491	3.76369	1.56401
	Csa3G204780	0.00166737	0.0117266	3.20856	3.73791	2.82499	3.36346	2.89008	3.07749	2.84017	1.83726	2.36845	2.17964	1.85496	2.26417	3.04126	2.79636	2.51524	1.90626	1.44392
	Csa1G015700	0.00721877	0.0377136	0.425768	1.03395	0.585666	0.293927	1.42014	3.0678	1.34243	2.17367	6.28677	4.45418	6.1989	2.1575	2.60107	1.45945	3.0393	5.14463	2.51827
	Csa5G157280	0.00932287	0.0456764	0.780478	3.90673	7.53429	3.91666	12.1693	1.66365	1.62848	0.701827	2.31451	1.75509	2.71819	0.0952993	0.92829	0.678254	1.22898	1.64939	0.862635
	Csa6G008650	0.00075098	0.00608345	4.05036	2.87721	2.89629	3.10683	2.6448	3.02651	2.23277	3.68136	2.33554	2.13405	2.3098	2.80253	2.36006	2.54212	2.43305	1.83502	1.29059
	Csa6G008710	9.19e-06	0.00013857	2.20275	3.34472	1.24331	1.34395	1.63768	2.64525	3.47692	2.17518	1.50566	1.74125	1.17816	3.20467	3.4966	6.29029	3.44395	2.79655	2.85602
	Csa2G370550	4.67e-08	1.24e-06	1.07368	1.14025	0.828874	0.48871	0.649659	2.94713	4.12489	4.09329	1.13714	0.449893	1.28527	6.83594	5.97048	5.62794	3.78387	2.89824	1.28292
	Csa3G633290	7e-07	1.41e-05	0.781634	1.04423	1.03511	1.19108	1.54737	1.26514	0.535751	0.867493	3.23335	3.9872	1.63742	3.48565	2.5722	1.93605	7.38479	4.59642	7.55289
	Csa3G142970	0.00666673	0.0355901	1.57404	2.28828	3.60863	3.45494	4.22239	2.14228	0.875803	3.16568	1.55594	2.56494	4.72629	1.6657	1.2481	1.92517	2.75396	3.33949	3.6362
	Csa6G496450	5.62e-13	3.64e-11	0.376989	0.910823	1.80573	1.8518	1.49695	0.509311	1.39839	0.519433	4.59994	3.84712	1.65352	1.89881	1.09549	0.910034	6.30726	7.42801	8.19269
	Csa6G046340	0.00300626	0.018962	3.96019	3.81101	3.58882	4.00183	3.13487	2.63182	2.53149	4.41654	2.28038	2.2179	2.41634	2.72293	2.82695	1.0395	1.21086	1.26182	0.781004
	Csa3G893960	0.00727799	0.0378804	1.90359	2.09193	3.14435	1.50898	3.34486	2.83265	1.45827	1.63253	3.37478	2.3332	2.38399	2.49278	2.66979	2.25097	3.18573	4.60933	3.69204
	Csa7G212670	0.00388315	0.0231366	2.42506	3.02536	3.2865	3.55252	4.25025	2.71138	1.47338	1.35838	2.68648	3.06596	2.18973	1.99108	1.80836	2.1801	2.7652	2.66121	3.49717
	Csa7G062780	1.12e-08	3.45e-07	1.1857	2.98852	3.59483	2.37467	6.24171	1.22048	1.09954	1.53299	4.10221	3.17971	5.64195	0.744573	0.366299	0.457955	1.84927	4.44718	3.92647
	Csa4G337890	1.12e-05	0.000164073	1.06393	1.90562	2.38414	1.92293	2.49034	2.28634	2.04248	1.12618	2.88293	2.46367	2.58071	1.89167	2.36132	2.66741	4.78102	5.40177	4.77284
	Csa3G731730	0.00073341	0.0059869	0.960831	2.14284	2.04545	2.15432	2.23265	3.10898	1.03952	1.95098	4.05635	3.36624	3.10309	3.22633	2.04896	1.46895	3.81044	4.08761	4.24151
	Csa1G025070	1.67e-10	7.63e-09	1.00523	1.53443	3.67416	2.968	2.9591	2.58334	0.894901	1.30633	5.78812	2.45707	2.96921	1.22742	1.13039	1.5336	5.63507	4.57863	2.83467
	Csa3G119580	0.000519481	0.00447425	0.803742	0.445197	1.30069	1.15491	2.62831	3.00917	1.55645	1.83772	4.79036	3.35133	5.19977	2.10712	2.96501	3.44671	2.87865	4.41978	3.24833
	Csa4G641630	0.000818378	0.00654874	1.54305	3.32884	1.5161	2.98845	2.69115	4.03306	4.79782	5.26585	2.69171	2.12987	2.28176	1.88412	3.04245	3.24281	1.52456	1.17349	1.19302
	Csa6G094680	1.91e-07	4.4e-06	1.20282	2.07876	2.96969	4.2255	5.51913	2.8889	1.77323	1.18091	4.38247	7.41791	2.9397	1.39337	0.800344	0.53604	1.58644	2.45375	1.99
	Csa7G041920	0.00163398	0.0115375	1.31706	2.25489	2.31362	1.86508	2.23983	1.91714	1.51744	1.71341	4.3397	5.42396	2.34102	3.16762	2.1577	1.81125	3.39366	2.7387	4.86425
	Csa3G081350	3.19e-05	0.000415131	2.7173	2.69338	2.72918	1.79571	2.68548	3.08188	3.16382	3.78343	1.7907	2.56818	1.92908	2.87553	4.37451	3.32345	1.8066	1.80157	2.27279
	Csa5G076690	0.000704791	0.00580046	0.843605	1.30072	1.98009	0.895968	3.17611	2.42012	1.13	3.9697	3.41669	4.71971	3.28903	1.0873	1.21621	0.950332	1.96797	7.69051	5.71205
	Csa2G361530	0.00244254	0.0160665	2.31035	2.29002	2.06823	2.01753	2.50076	4.13088	3.38035	3.09768	2.34722	2.56004	1.61329	3.19716	3.10874	3.42061	2.42533	2.45082	2.88329
	Csa5G159600	7.6e-17	8.53e-15	2.42857	2.1476	1.82472	1.23908	1.41185	4.14593	4.08471	3.42563	1.67692	1.39673	1.29682	4.47714	5.14887	6.0234	1.97456	1.84693	1.36558
	Csa5G647390	1.27e-05	0.000183096	5.46663	5.12562	3.45497	2.44791	2.69089	2.69689	4.35696	4.69717	1.2414	2.13792	1.70231	1.65972	2.26849	1.45515	1.55099	1.64566	1.51824
	Csa2G248690	0.000904011	0.00711163	1.35936	2.22321	2.07022	4.04247	3.95838	2.44866	1.26059	0.236589	3.52729	3.05685	2.42054	2.40676	2.86616	2.16575	5.494	2.83896	3.89827
	Csa5G160200	0.00847444	0.0425597	2.06721	1.96364	1.73491	1.69238	1.27688	3.51686	2.23651	2.04878	2.5543	1.55796	2.34571	4.68018	4.61009	3.7842	3.07429	4.28301	2.93321
	Csa2G374650	1.83e-09	6.73e-08	4.36872	6.9375	2.44961	1.6276	2.39775	5.1914	5.833	2.91932	2.06315	1.58778	1.77288	1.67572	2.99252	1.2368	1.41666	1.36482	0.73792
	Csa7G043020	0.00261049	0.0169375	1.69591	2.94818	2.92242	1.71804	3.28764	2.88256	1.54849	1.84666	2.77251	2.95909	3.11545	1.87962	2.25688	2.09101	4.27273	4.95595	3.70989
	Csa6G045090	0.000861626	0.0068204	0.954318	1.68163	2.13577	2.42127	2.35787	1.87821	1.37663	1.13805	4.84774	2.22895	1.69374	3.62525	3.06694	3.73708	5.42647	4.16536	4.18109
	Csa5G155580	0.000449466	0.00396616	4.39586	3.25536	3.27656	2.68317	2.22035	2.33608	2.6005	3.60552	1.81054	2.59355	2.01111	3.91767	3.66041	2.21986	2.59904	1.58285	2.38477
	Csa7G071700	0.00115826	0.00871619	1.64316	2.19375	3.22893	2.06568	3.51534	1.93298	2.14571	1.712	3.56342	2.78684	3.33682	2.25203	1.81294	3.46462	4.78756	4.50216	2.4442
	Csa3G619930	1.06e-05	0.000155863	1.92449	2.16621	2.43572	2.45967	2.9013	2.3111	1.33093	0.870483	3.46617	3.15726	2.45994	2.94731	1.3755	1.85826	6.64291	4.41172	4.67704
	Csa3G179080	0.00677701	0.0359974	0.827382	2.55142	4.60663	2.14802	6.32741	4.85756	2.30179	0.320002	5.45244	3.056	2.69618	1.57152	1.09342	0.97644	2.50916	2.92562	3.40526
	Csa1G173150	0.000586572	0.00495674	3.05544	1.30964	2.10957	3.59591	4.28466	1.38836	1.68474	3.25775	3.77537	4.68285	4.49782	1.31082	0.535739	1.91369	3.03411	2.95651	4.24292
	Csa1G705100	0.00293849	0.0186001	2.08747	3.00564	2.63394	3.5706	2.90841	2.7443	1.71165	1.1728	3.04089	3.91002	2.73886	3.005	2.63724	2.16414	3.85217	3.36529	3.36071
	Csa3G038750	0.00116946	0.00877968	1.30667	2.41311	2.66231	2.498	2.942	3.61734	1.1352	1.53208	5.72742	3.483	2.17544	2.90548	2.32005	1.5406	4.24504	3.83006	3.61568
	Csa6G483310	0.000112068	0.00123171	2.71453	2.97996	2.23695	1.92201	1.73081	2.97943	2.16541	4.09793	2.38036	2.28304	2.69043	3.42147	4.19753	4.11485	2.29808	2.98988	2.79014
	Csa4G644670	3.42e-08	9.33e-07	2.81202	2.97309	1.01307	1.19462	0.893281	1.68846	3.56385	4.56787	1.27402	0.824803	1.17816	10.9875	4.25673	4.79691	0.983986	1.58471	3.58403
	Csa3G844850	5.71e-06	9.09e-05	1.61836	1.81598	2.97018	1.91339	3.97697	2.34682	1.64235	2.01949	3.62206	4.09006	4.41371	3.05732	1.94796	2.0344	3.01313	4.09956	3.64857
	Csa7G042990	1.38e-13	9.72e-12	5.46995	7.3559	2.01148	2.75185	3.35329	5.45479	4.68687	5.12193	2.25293	2.31435	1.8763	1.56234	1.66019	0.895724	1.04098	0.508993	0.191109
	Csa7G378370	8.08e-05	0.000931349	0.901452	2.55871	4.87141	1.56666	3.55781	1.32858	0.721958	0.618061	5.16424	1.40217	3.30474	2.9519	1.77219	3.12562	5.63487	5.41971	3.62307
	Csa7G433150	0.00107479	0.00819811	1.09499	4.43184	2.64484	0.920671	2.174	4.3284	1.94623	3.59977	3.21336	0.847544	1.57702	6.35085	3.65056	5.33055	2.01159	2.54092	1.90805
	Csa4G642310	0.0018347	0.0126761	2.67007	3.7925	2.40708	2.42651	3.17706	4.95843	3.49711	3.03418	2.99309	2.36834	1.12445	1.81499	4.49426	3.08317	2.57177	2.35426	1.84189
	Csa5G175820	2.92e-07	6.42e-06	2.48084	2.459	1.40241	1.76858	1.79926	4.97895	4.38055	5.83586	2.30954	2.69136	1.45944	6.18288	4.11551	1.73917	1.24864	2.19682	1.62428
	Csa3G100780	0.00118727	0.00888489	2.4146	2.50214	1.68228	2.00496	1.39461	4.00681	2.46307	3.5912	3.66162	2.85441	2.82804	4.10085	2.96684	4.00594	2.30433	2.96891	2.93762
	Csa3G389850	2.18e-10	9.85e-09	2.88395	3.96699	1.33005	1.37521	1.93198	3.39262	2.9473	3.00478	2.18172	2.12914	2.15768	4.3838	5.15475	5.34206	2.34784	2.39983	1.89881
	Csa3G893400	5.99e-06	9.5e-05	0.779889	3.47861	1.40483	0.690247	0.963448	3.90233	5.06255	4.22286	1.28487	0.889591	2.58679	5.2375	4.4974	7.78148	2.59255	0.904866	2.64031
	CsaUNG003100	0.00294092	0.0186066	1.69622	2.31177	3.45472	1.65138	3.01221	2.58865	1.44189	0.738041	4.51926	2.52217	2.16532	2.33004	3.85915	1.85963	6.19511	5.81625	2.78682
	Csa2G360650	2.36e-06	4.17e-05	1.6522	1.50532	2.73837	2.41056	1.78483	2.84588	1.85715	1.29739	3.27876	3.5734	2.53467	3.28081	2.67066	2.59443	5.32589	4.91273	4.80583
	Csa2G375180	0.00922705	0.0453481	3.06438	2.12618	3.25174	3.4824	2.93116	2.83358	2.23548	0.888894	3.71069	3.4355	2.16122	2.68157	3.04832	1.61754	4.43929	4.33764	2.88043
	Csa7G392380	0.000451202	0.00397964	3.22567	3.46464	2.2859	2.11283	3.22519	3.65771	3.76256	2.09957	2.54141	2.3406	1.96599	3.49951	3.75514	2.8976	3.28	2.93967	2.39046
	Csa1G050520	0.00908751	0.044824	2.08107	1.88338	2.00028	2.97902	3.16171	3.36839	2.13962	0.629909	4.19253	3.89245	1.99024	2.54106	2.83718	2.70838	4.41676	4.72414	4.00023
	Csa3G730720	0.00538258	0.0301515	2.31311	2.42377	2.70562	2.78424	2.65926	3.14816	1.34831	1.22692	5.06298	2.60617	2.56128	3.06649	2.90601	2.40367	4.64831	4.1407	3.55358
	Csa3G088930	0.00671318	0.035738	3.62103	1.78396	3.38938	4.23264	3.17631	2.39294	3.05988	1.81483	3.86531	2.89092	3.4786	2.32844	1.83022	2.08957	3.98117	2.64224	2.99541
	Csa7G073480	4.67e-05	0.000576389	3.99956	4.21921	2.47011	2.42732	1.72428	4.25411	3.81492	2.45292	2.11798	1.5921	2.24426	2.0581	4.57169	3.94466	2.78907	3.57981	1.39956
	Csa5G512900	0.00237823	0.0157248	0.793066	3.02643	2.33765	1.22132	3.69497	1.80953	1.06639	2.66855	3.47876	2.94649	3.82115	1.79147	1.28627	2.60362	3.78803	6.19133	7.15453
	Csa2G131680	0.00305429	0.0191902	1.28429	1.48516	6.30934	1.81868	5.66633	2.05639	1.78646	5.21555	4.49623	5.65052	5.15665	1.04545	0.462886	0.413364	0.449403	2.55446	3.83645
	Csa2G338880	0.00157464	0.0111764	1.43921	1.44332	2.26252	3.39875	2.72519	3.27365	1.39744	1.65026	4.37258	3.16191	2.7844	4.81714	2.43493	2.28887	4.94131	3.85607	3.50006
	Csa3G903520	0.0039391	0.0234221	1.25434	0.87031	1.93082	1.06576	3.45333	3.56496	1.35706	4.12364	4.54635	4.41498	5.29915	2.75687	1.76315	1.73601	1.93125	5.32241	4.4464
	Csa3G146560	0.00378471	0.0226881	4.20613	3.56759	3.24857	3.20038	2.32661	2.94018	2.79439	3.66632	1.99096	3.43721	3.26587	3.01507	3.5071	2.64696	2.78986	1.76893	1.47524
	Csa7G024150	0.0013412	0.00984039	0.803112	1.81953	1.5406	1.09666	3.68508	1.79112	1.8087	2.39617	3.59134	3.25302	5.84839	2.98859	1.11648	2.14178	1.84674	6.04726	8.22535
	Csa3G036540	0.0101115	0.0484827	2.81442	2.74113	2.95764	2.54724	3.18746	3.29163	1.88368	1.59018	3.32636	3.34988	2.30706	3.01815	2.24926	1.6069	4.41887	4.52698	4.21093
	Csa1G004120	2.61e-07	5.8e-06	0.855588	1.45381	3.12241	2.33664	4.40042	3.0824	2.49361	0.709095	4.68182	3.22657	4.35284	1.04471	0.925114	0.826141	5.26069	5.59151	5.69582
	Csa1G046190	6.17e-09	2.02e-07	3.47177	3.5704	2.7359	2.22746	2.23333	4.14074	3.23049	2.21349	2.66465	2.18956	2.14712	4.84682	4.38167	3.40948	1.7663	2.54532	2.29363
	Csa1G044930	0.00042454	0.00377415	0.424298	0.714959	1.37573	0.495698	1.79713	2.90435	2.5182	3.10156	5.40002	4.48029	4.79979	3.10851	2.20213	3.52338	3.78602	5.23236	4.25868
	Csa7G407840	6.29e-07	1.28e-05	2.2396	2.86249	3.35864	4.63203	3.36999	2.26485	1.3117	1.50445	3.64119	4.26412	3.88914	1.36732	2.61277	1.47962	4.45463	4.10288	2.95774
	Csa7G041320	4.63e-13	3.05e-11	6.23911	5.17927	3.16725	2.56772	2.86282	4.05842	4.07414	2.59405	2.31276	2.21127	2.15112	2.5394	3.82279	2.53526	1.06431	1.37023	1.58419
	Csa3G827930	9.57e-06	0.000143417	1.75967	0.87209	3.71722	1.58856	1.67696	2.43014	1.87658	1.22504	4.23986	5.16134	2.7647	2.57834	2.37832	2.03892	5.8188	5.16247	5.04622
	Csa1G009750	0.00259728	0.0168748	5.60695	3.60912	4.30188	3.08425	2.93308	3.27277	3.87376	2.51416	2.9258	2.27142	2.76097	2.5094	2.65691	2.15696	2.13396	2.22156	1.57482
	Csa4G621720	0.00139477	0.0101515	0	1.12224	1.29784	0.801655	1.5985	3.17252	1.22493	0.437897	3.03113	3.13642	4.74365	2.99535	3.87667	0.546619	5.94276	9.94615	6.53879
	Csa3G807350	0.0027101	0.0174589	0.956086	2.22497	2.24637	3.53193	2.55297	3.49437	4.47163	3.56918	3.955	6.38087	3.61388	1.26893	1.07872	1.60553	2.79281	2.68712	4.22195
	Csa1G701260	2.18e-14	1.75e-12	4.48165	3.78757	1.76136	2.55528	1.44864	4.36222	3.10607	3.12002	1.74873	2.26007	1.03767	5.35706	4.99886	5.96726	1.13903	1.73589	1.8038
	Csa4G627220	0.00809121	0.0411115	3.47614	3.73709	3.20525	2.72633	2.77478	2.69734	3.19876	2.5441	1.85024	2.06534	2.99684	3.10174	3.0358	4.82819	2.3579	3.74953	2.33239
	Csa1G013190	1.64e-11	8.85e-10	1.61785	1.08719	5.92732	5.3878	5.48779	1.90993	1.75458	1.78173	3.55764	4.34323	4.5955	1.30581	2.16441	1.21796	3.31037	2.37252	2.98162
	Csa4G434480	5.01e-05	0.000613192	1.62695	2.15018	2.60503	1.53594	1.27612	2.38796	3.12923	3.70557	1.04238	1.59069	1.1992	4.56175	5.6684	9.77484	2.90979	2.63675	3.02402
	Csa6G421800	3.38e-05	0.000435379	1.46944	1.99846	3.05544	1.2703	3.40142	1.84671	1.5845	2.14114	3.2091	3.17408	3.90155	2.08633	2.8082	2.57376	4.01785	7.10288	5.26742
	Csa6G001760	1.24e-15	1.19e-13	1.2729	1.17758	3.83538	3.84542	4.58269	2.03814	0.341006	1.18155	5.38254	3.53998	4.05908	1.8651	1.00931	0.955955	7.30479	4.47283	4.08969
	Csa7G372280	5.96e-14	4.49e-12	4.50905	4.81078	1.84596	1.43003	2.42044	2.59462	4.52987	3.23356	1.93455	1.40829	2.19748	6.61451	4.3676	4.4748	1.57782	1.21448	1.79593
	Csa7G031610	0.0023581	0.0156243	1.90136	1.44634	3.06291	1.90197	2.85611	3.05328	2.21426	1.847	4.20701	2.98302	3.24206	3.37447	3.01209	3.26623	3.3189	5.36489	3.90979
	Csa5G604260	1.17e-06	2.26e-05	2.59264	4.23674	1.20484	2.12099	1.48395	2.60859	4.12623	4.67495	1.77493	3.04868	2.93581	5.68973	3.71251	3.78894	2.42743	2.22995	2.38622
	Csa7G396440	0.00330642	0.0203794	4.25116	7.59008	3.5941	2.63456	3.7782	6.35717	5.36748	2.63836	3.49819	1.61687	2.20287	1.54737	1.78811	0.642195	1.53789	1.50162	0.547698
	Csa2G010260	2.95e-07	6.48e-06	3.15405	3.23637	2.70614	2.35903	2.56363	4.18776	3.00726	4.45855	3.12875	2.6277	2.37305	3.03757	4.10683	3.79614	1.86536	2.49611	2.07014
	Csa5G643340	0.00503625	0.0285907	1.57308	1.76714	2.06082	2.70101	2.94276	3.9671	1.41016	2.37281	4.82696	4.43464	3.81718	3.68152	2.77816	2.50625	3.57797	3.41568	3.4147
	Csa4G642420	0.000306897	0.00288429	2.96778	2.26419	3.72889	3.57226	4.2091	2.69998	2.08495	2.35827	2.37804	3.67541	3.54187	2.26211	2.58661	2.51829	3.64416	3.3271	3.43869
	Csa2G416820	1.51e-05	0.00021535	2.20082	3.0084	4.14104	3.62072	3.21384	3.10934	1.26723	1.20169	3.96355	4.14883	2.33535	2.51164	2.34855	1.76395	4.71129	3.93396	3.83286
	Csa4G192100	0.00795166	0.0405645	1.26541	2.04644	2.68293	3.53671	3.10298	2.47937	1.42051	4.09563	3.12714	4.49301	4.74365	1.95172	1.08019	3.79418	3.21608	4.57015	3.81982
	Csa7G063940	0.00133643	0.00981823	3.00588	2.54866	3.61167	4.57713	2.99114	3.17481	1.02431	0.882429	4.20637	3.22215	2.75016	2.74166	2.68234	2.32543	5.15139	3.45755	3.20221
	Csa1G569110	8.21e-21	1.35e-18	3.59151	3.82997	1.11948	1.81515	1.73102	3.30168	5.19106	3.07511	1.92813	1.88893	1.81608	5.2322	5.40993	5.16598	2.15814	2.09379	2.2493
	Csa5G609610	0.000103665	0.00115399	3.37016	3.71765	3.5917	2.16492	3.69812	3.03538	3.79318	3.46888	2.08212	1.88668	1.93582	3.45136	3.95258	3.34602	2.25397	2.82455	3.03644
	Csa4G269120	3.64e-08	9.9e-07	0.919655	2.25909	2.98579	2.29321	2.74148	2.25682	1.84471	0.823499	6.13875	3.98757	2.37678	1.51352	1.96716	1.40922	6.64252	7.23724	4.26413
	Csa6G521000	3.12e-10	1.36e-08	1.44554	2.71481	1.4203	0.606026	0.443086	3.33482	1.90493	2.4276	1.45712	1.11578	0.916434	6.08481	7.07466	12.0846	2.83529	3.66964	2.22724
	Csa1G560730	8.04e-05	0.000928627	4.81709	2.74708	1.94506	2.24267	3.77315	4.27915	4.46707	3.90481	3.34297	1.87099	2.48823	4.59267	2.14049	3.95042	1.80106	2.09999	1.41925
	Csa6G509680	0.00242202	0.0159701	1.71226	2.20904	2.617	2.62678	2.66207	3.0517	1.73907	1.98672	3.79484	3.93279	2.74715	3.21906	3.37953	3.96273	4.20836	4.01384	4.12436
	Csa6G149370	2.51e-33	1.11e-30	4.74959	3.54612	0.0909088	0.589605	0.424549	7.00002	6.14911	5.18885	0.342976	0.542774	0.323044	8.17192	7.56992	7.23654	0.129505	0.0613437	0.0368519
	Csa6G155030	3.87e-52	5.67e-49	3.10586	5.072	0.650347	0.648914	0.835667	3.1795	4.03699	4.01725	0.817866	0.647153	0.853295	6.59003	8.42315	9.36563	0.962094	1.6963	1.30802
	Csa4G038690	2.7e-06	4.7e-05	1.88558	3.00116	4.22191	2.86914	5.49069	2.59096	1.98396	2.52441	4.65974	2.60579	4.50077	1.54967	1.35267	1.73315	2.85493	4.97652	3.63953
	Csa4G022870	0.000130034	0.00139807	0.986927	1.98705	2.33332	2.09637	2.64526	2.74075	1.88763	1.61033	3.92517	2.89479	2.61666	4.14245	2.90125	3.51404	5.86011	5.21421	5.12242
	Csa6G501360	3.68e-07	7.89e-06	3.39256	3.9741	1.21212	1.71968	1.22466	4.25927	3.43206	5.99401	1.61961	2.41233	2.50359	2.6361	5.25226	5.3604	1.69976	2.22371	3.59306
	Csa1G522530	0.000731209	0.00597661	3.55556	2.99321	3.7168	4.56943	4.14314	3.41196	2.01747	0.847703	4.33315	4.00014	2.21072	2.12117	1.68525	1.64605	4.53354	3.536	3.2009
	Csa3G171050	0.00265272	0.0171765	1.89044	2.39072	2.81817	3.66939	4.2106	2.50506	0.846315	1.21019	4.43011	3.44168	4.50647	4.7758	2.18503	2.51776	5.06395	3.24146	2.88199
	Csa4G617340	4.28e-06	7.05e-05	1.83484	2.42492	2.61095	3.15829	3.9751	3.44445	2.38604	1.27248	5.02948	5.31998	2.67295	2.26616	1.71029	1.28295	5.22497	4.19483	3.78003
	Csa4G099770	7.01e-17	8.01e-15	2.60132	3.96876	0.751735	1.24596	0.864158	5.23712	4.89557	3.49176	2.07981	1.32154	1.17537	5.69868	4.6327	5.8116	2.9985	3.24645	2.59023
	Csa7G072810	1.68e-05	0.000237543	2.10077	0.957851	4.41715	5.26556	6.18405	1.16049	2.53257	1.85251	3.42641	4.64193	4.84093	2.30861	1.63547	2.31246	2.95513	2.17279	3.91588
	Csa1G025940	0.00136739	0.0100057	0.961875	2.12531	2.95337	1.34082	3.28895	3.56157	1.17073	1.51133	4.92739	3.89889	4.49177	3.54792	3.29345	2.45737	3.32374	5.22136	4.64519
	Csa6G434350	0.000452018	0.00398499	1.79383	1.13906	2.01036	1.75633	1.57299	2.32248	1.42956	2.08137	3.53254	3.39808	3.05324	4.41489	3.12154	3.5995	5.56103	4.59928	7.36798
	Csa6G146940	0.000758845	0.00613502	2.08891	3.30524	5.10284	2.9106	6.04725	3.06088	2.80794	2.13468	4.09662	3.18532	2.46902	1.96563	1.71989	1.49888	3.42006	4.19296	2.79369
	Csa5G175830	2.73e-08	7.62e-07	4.17382	4.18946	3.06273	3.25453	3.00235	4.58932	3.4786	3.39205	2.11078	2.66888	2.6194	2.49444	4.22736	3.23094	2.2185	2.43448	1.66241
	Csa1G537540	0.0099954	0.0480712	3.47423	2.98316	4.42572	4.33345	3.5077	3.03209	2.32268	1.19527	3.594	3.25855	2.85621	2.54036	3.27606	1.83336	3.77435	3.57565	2.84798
	Csa2G401390	6.34e-07	1.28e-05	2.20532	2.24553	2.95475	3.68365	4.26702	2.76872	2.32396	1.32593	4.5581	3.19505	3.3599	3.08446	2.27614	2.30365	4.18818	4.60571	3.61727
	Csa4G122810	5.43e-09	1.81e-07	1.50495	2.63242	0.782825	0.282064	1.12487	2.44514	5.58239	2.77335	0.984469	0.692427	0.463628	6.48565	6.12609	14.0187	0.836388	2.72923	3.59647
	Csa1G050270	1.38e-09	5.2e-08	1.62633	1.02583	2.94165	2.66943	3.2485	1.64233	1.98803	2.10146	4.47578	2.9272	2.74879	3.02385	2.31801	2.07002	5.47101	5.58733	7.28727
	Csa1G612930	0.00220239	0.014767	3.59123	2.99758	2.92496	2.78532	2.92708	3.57497	2.93591	1.97378	2.77338	2.65649	2.47472	4.41387	4.31734	3.80983	2.87706	3.3835	2.85132
	Csa2G420470	0.000520211	0.00447851	1.57618	1.44658	3.90032	1.30201	1.48355	2.03302	1.56992	2.64164	3.53447	4.79438	3.1796	2.49482	2.39859	3.4948	6.80232	6.61838	4.11546
	Csa5G615830	5.83e-07	1.19e-05	0.984027	0.785712	3.38395	1.5096	5.35458	2.88861	0.760439	3.61557	6.24831	5.07773	3.83651	1.20153	1.77332	1.02934	2.89813	7.14933	4.89915
	Csa3G002690	0.00155985	0.0110988	2.14736	6.00529	2.82571	3.01371	3.49192	4.55884	3.9471	3.15895	2.74809	2.28695	1.56642	2.3879	3.52424	4.07285	2.89829	2.70757	2.06183
	Csa5G550210	0.00154957	0.0110339	1.68931	1.844	3.80285	1.95314	2.76242	2.54225	3.03397	2.05934	3.67268	3.32422	2.10541	2.53269	3.02889	2.33318	4.62424	7.48564	4.62471
	Csa6G499070	1.23e-05	0.000178172	0.676949	0.894654	1.25635	1.27816	1.03539	0.54196	0.627761	0.523639	0.743515	6.25091	0.945413	1.01026	0.487972	0.798905	8.92245	4.78738	22.7383
	Csa1G003490	3.08e-05	0.000401164	2.77325	3.13062	2.97081	4.78625	4.13972	2.68279	1.64306	1.36309	5.378	4.59438	3.18721	2.82187	1.95742	1.84099	3.01234	4.5392	2.83045
	Csa6G008740	0.00107433	0.0081978	1.16877	2.73227	4.07342	2.36552	4.92701	3.60158	2.82208	2.63546	4.30522	3.53596	3.37234	1.3194	2.02676	2.44872	2.96315	4.89059	4.55851
	Csa5G623740	4.86e-05	0.0005974	2.39342	1.48629	3.20161	4.47143	3.57253	2.38942	1.84513	2.71015	3.52746	5.07486	4.289	2.85203	2.18257	2.92361	3.75366	2.63835	4.78939
	Csa2G297200	0.000353874	0.00324893	4.12302	3.67113	2.76935	2.64716	2.41723	3.8883	3.93145	2.45953	2.15869	2.64187	2.48868	3.29936	3.47578	3.98112	3.0811	3.72969	3.34002
	Csa6G361410	2.64e-08	7.42e-07	0.947662	1.57806	0.40969	0.241556	0.802772	1.95742	1.93337	3.73852	1.03044	1.63071	0.714682	11.201	8.0744	7.83279	5.88935	3.05354	3.30644
	Csa7G073740	1.7e-05	0.000239243	4.40452	4.36575	3.38682	4.10164	3.10925	4.02449	4.23247	4.81427	2.91835	1.93474	3.40994	3.50745	3.20947	2.09564	1.9433	1.96796	1.10597
	Csa3G872040	0.00875738	0.0436245	4.06845	3.83101	3.3978	3.45678	2.90791	1.34358	3.96147	5.66471	2.76489	1.69055	3.72876	4.22257	4.39906	3.43737	1.38805	2.12419	2.18759
	Csa3G119750	1.81e-08	5.29e-07	5.4573	5.53507	2.99275	3.63937	2.82214	3.35301	6.59077	5.74304	1.09773	1.98537	1.59521	3.7192	2.74454	4.16656	1.73199	1.00973	0.454942
	Csa3G778420	0.00404672	0.0238804	2.22691	2.56048	3.93844	2.93276	3.86719	2.13941	2.80853	1.86038	3.41201	4.44164	3.82537	2.93667	2.79313	2.06425	5.79757	2.03749	5.00247
	Csa5G511840	8.47e-07	1.67e-05	2.17006	4.39545	0.92703	0.300621	0.599439	8.27122	3.4123	1.20422	1.98189	1.10697	0	6.2211	8.36544	7.83488	4.35802	2.34579	1.24012
	Csa2G377920	5.22e-16	5.32e-14	0.572343	0.810437	1.76738	1.25047	1.8874	2.10123	1.39513	0.834851	4.38465	4.95634	4.36773	2.69557	1.02553	1.31056	7.99957	8.96076	8.44106
	Csa7G023930	0.00628864	0.0340193	2.48312	3.61655	3.58495	3.55221	5.04404	0.912841	2.58466	1.99916	3.25605	4.21145	4.1933	2.90823	2.41093	2.83804	2.5535	4.03178	4.60193
	Csa4G182290	0.00142847	0.0103611	0.648194	0.240933	3.50281	0.602374	1.20113	0.778408	0	0.188024	0.200231	4.19857	0.33947	0.0989336	0	0.547649	13.2688	3.94835	25.0749
	Csa1G600880	0.00348916	0.0212853	3.53852	3.89708	2.98005	3.34058	4.28215	3.23761	2.50012	5.27878	2.01263	2.25152	2.52974	4.11492	2.61144	5.15221	2.9481	2.17846	2.21472
	Csa5G387980	5.67e-05	0.000684875	3.06954	3.29191	2.17543	2.29808	2.50432	4.04874	4.80639	4.96284	1.30572	2.31234	2.8989	3.13359	4.29834	5.19896	2.64123	2.60226	3.78799
	Csa4G279800	0.00947792	0.0462274	2.61779	2.85903	3.76285	1.57034	3.28526	2.5324	3.16934	2.30618	3.80365	3.2467	3.24973	1.77579	2.46359	2.48088	5.52157	5.49605	5.21325
	Csa3G734120	0.000422718	0.00376321	0.651877	0.824385	1.54602	0.57297	2.1898	3.99513	1.79269	3.36453	6.52712	4.30759	7.29888	2.3879	2.3819	3.42937	3.72835	7.1312	3.30368
	Csa4G193230	0.000156522	0.00163277	1.65987	2.13884	2.0223	1.69238	1.65216	4.6245	2.46282	4.16002	3.48666	1.91499	1.80815	5.63441	6.35343	6.73152	2.57886	4.25891	2.30069
	Csa2G369840	0.00369572	0.0222525	1.30904	2.50854	3.51557	3.05865	2.95707	2.62002	2.02321	2.4302	3.3428	3.8396	3.0165	4.68861	2.83083	1.76958	4.58062	4.51305	6.56943
	Csa4G022900	0.000495566	0.00429738	1.04014	2.21817	2.19879	2.37678	2.87028	2.87669	2.57216	2.99887	4.12828	3.54393	3.6646	3.34831	3.5103	3.13475	4.59922	5.61092	5.00902
	Csa3G848170	0.00570335	0.0315604	1.68605	1.90577	1.78739	2.52898	3.14783	3.33907	1.4401	2.02495	4.86109	2.73299	2.29274	5.02041	3.15038	2.542	6.05512	6.39823	4.78916
	Csa5G590060	0.00153469	0.0109484	1.76508	1.96824	2.70978	3.86644	3.09556	2.25214	1.73913	3.45602	4.56642	3.02005	4.91089	3.4349	2.98205	2.8228	3.87955	3.45589	5.79992
	Csa6G006690	0.00326583	0.0201933	1.91321	4.48653	6.64807	3.4692	7.95524	2.91396	2.7262	1.89502	4.49738	3.33052	3.66578	1.31049	1.96777	1.35173	3.13509	1.48502	3.0109
	Csa3G182000	0.000334791	0.00309909	2.27239	2.74577	3.04073	2.94209	2.42911	2.80685	2.06713	1.30576	4.19835	4.10493	3.76295	4.09594	3.01865	2.40315	5.54338	3.98171	5.14601
	Csa2G386160	0.000367324	0.00333707	2.55587	1.91009	2.71055	2.2621	2.98561	2.92316	1.82465	1.97704	4.98779	3.78803	4.67432	3.86387	2.7197	3.42765	4.70601	4.80121	3.75686
	Csa3G846050	5.02e-05	0.000613527	2.90896	2.17142	3.91674	3.69979	4.86756	2.67391	2.53107	1.87514	4.12688	4.63487	4.58922	2.10486	1.55326	3.39835	3.27993	4.60731	2.96092
	Csa7G045510	0.00143084	0.0103744	2.34676	1.80919	2.43388	3.04629	4.27963	3.13132	0.846315	3.02547	5.47723	6.11854	3.55055	3.02467	2.81939	0.881217	3.69531	4.79736	4.67349
	Csa4G377750	1.78e-08	5.21e-07	1.98626	1.793	3.20616	2.71228	4.46935	2.34268	2.13796	0.987706	5.60977	3.98802	2.86066	2.68515	2.99139	1.78091	5.77128	6.06711	4.61955
	Csa5G173520	0.00822013	0.0415892	1.74928	2.18799	2.45533	1.99056	3.66046	2.80091	2.62637	1.40144	5.09484	3.58346	2.83563	4.52614	3.24244	3.45857	5.77132	5.01186	3.98129
	Csa2G408430	4.58e-08	1.22e-06	3.72999	2.53453	1.98225	1.8188	1.73883	3.52146	3.43721	2.72193	2.55082	2.29362	2.43261	4.64039	7.71106	8.99269	1.99474	2.19302	2.13034
	Csa7G390120	0.00174198	0.0121721	4.1062	2.80382	3.09311	2.37436	1.98075	3.39697	2.83472	4.65852	2.31136	3.30096	3.63194	4.40102	3.69989	5.33055	2.73001	2.9039	2.99837
	Csa3G820520	2.9e-13	1.96e-11	2.97931	4.57253	1.16462	1.02072	1.52649	5.30902	3.65407	2.45327	2.37504	1.78533	2.58375	6.33691	6.26964	6.12474	2.75765	2.54875	3.17714
	Csa2G049330	6.55e-06	0.000102591	0.816171	0	0.744639	2.97199	2.53096	0	0	0.0676427	1.36865	3.07792	1.28233	0.996575	0.504282	3.37749	20.9913	6.89929	11.0758
	Csa1G045570	0.00659873	0.0352863	2.53431	2.76713	3.42383	3.63788	4.08821	3.09097	2.01967	2.91757	4.11003	3.40701	3.56701	4.10987	2.78307	2.90591	4.21928	3.85932	3.28843
	Csa5G167090	0.00174391	0.0121767	2.64812	3.33773	3.82252	2.49999	5.05423	2.70897	2.00095	2.57947	3.87803	2.65303	2.87647	2.43508	2.15632	2.58855	4.46158	5.29963	6.01588
	Csa2G366710	1.57e-06	2.94e-05	4.69801	2.32833	1.21473	1.70697	1.96368	2.67242	5.73243	7.45935	3.6663	3.26366	1.29496	5.73644	6.55023	5.01382	1.03827	0.737711	2.06815
	Csa3G855300	0.00593533	0.03257	3.32823	3.4472	2.44339	3.29651	2.81145	4.80517	4.71628	1.7356	2.44898	4.51545	2.27184	4.13238	4.60954	4.65802	2.68909	2.51033	2.97146
	Csa4G499300	1.2e-06	2.31e-05	2.13071	1.46212	3.62336	3.13333	3.64459	2.46032	2.50785	1.04595	3.64535	3.84594	3.60517	3.30212	2.39246	2.84867	6.96831	6.60146	4.40644
	Csa3G177390	0.000423162	0.00376541	2.95081	2.55923	4.0124	3.77755	4.37998	3.069	2.46765	2.44557	3.84142	5.04882	3.25636	3.63522	2.39295	2.72205	3.70613	3.51102	3.93512
	Csa3G150060	4.69e-06	7.64e-05	1.46487	1.77464	3.94473	2.53537	4.02145	2.60614	1.76093	4.21773	6.43567	5.03931	4.43259	2.71612	1.70124	2.51459	4.3855	4.47836	3.76001
	Csa7G278220	0.000283323	0.00269619	0.625422	1.42065	1.76669	0.85798	2.12472	3.16072	1.9091	2.90269	6.60089	5.325	5.48637	2.8001	3.35305	4.20212	4.2402	6.6604	4.39042
	Csa2G031160	0.000237084	0.00233521	4.51333	6.80767	4.14531	5.47082	7.79202	4.65414	3.4575	5.23679	1.69728	0.911327	3.4428	1.67725	3.76616	2.41585	0.669492	0.731822	0.468948
	Csa3G632280	1.01e-05	0.000150119	1.04002	1.51917	3.49582	2.03474	4.86872	3.28669	2.63954	2.41345	4.73447	4.8166	4.24273	2.74031	1.77557	2.58984	2.98801	7.51226	5.167
	Csa2G169770	7.55e-05	0.000878175	1.54886	1.02348	0.676361	0.639721	1.27561	2.99668	3.59079	2.99522	2.55174	2.10325	1.26181	7.03952	8.3736	7.47775	5.32946	3.85085	5.14084
	Csa4G297410	2.18e-05	0.000299432	2.49337	2.05076	4.53479	2.8735	5.11186	2.16606	2.21381	1.90817	5.37513	2.28219	4.83431	3.75704	0.975142	1.33184	5.79181	5.17034	5.07111
	Csa3G119710	1.62e-09	6.03e-08	1.64518	1.90248	5.87799	2.54152	5.17337	1.7362	1.96483	2.25596	4.46604	3.04642	4.85633	1.58271	2.23706	2.50317	4.26529	7.313	4.73577
	Csa1G574890	1.8e-07	4.17e-06	2.32217	3.03013	5.78588	4.14173	8.23788	4.09475	1.18121	1.28467	6.1503	2.67277	4.4336	1.31604	1.21836	0.775799	4.02175	5.04755	2.56398
	Csa2G406790	8.35e-06	0.000127824	5.14371	4.50181	3.92483	3.67589	3.40412	4.4192	3.13346	2.52379	3.19475	2.83554	3.0664	3.70826	3.71273	3.44761	2.85781	2.43527	2.3048
	Csa6G041170	0.00415315	0.0243855	3.57777	3.09739	4.16051	5.12258	4.17209	3.72545	1.40692	2.33837	4.11301	3.60873	3.67633	3.62206	2.42394	1.9241	4.54027	4.21116	2.67865
	Csa3G910710	0.00238189	0.0157436	1.96996	1.40589	2.7872	5.02136	4.83942	2.3657	1.68067	1.37144	1.84994	2.31126	2.64115	2.59782	2.55604	3.80431	13.0697	3.05623	5.08435
	Csa5G167030	3.5e-06	5.91e-05	2.04876	1.31997	4.5292	3.48147	5.20655	1.96826	1.99488	2.2583	6.07558	6.00928	5.47214	3.50225	1.55067	1.68151	3.11853	2.44498	5.75285
	Csa6G452650	0.00102883	0.00792775	1.14122	1.6402	2.07438	2.2423	4.83367	2.94652	0.793721	1.7876	4.37135	3.23577	5.73768	3.1353	3.02318	5.3995	6.88855	5.05048	4.15904
	Csa3G702640	0.00725199	0.0378162	3.36186	2.34053	3.42113	3.3155	3.13604	2.1628	2.3753	2.83269	4.69798	4.1478	3.47941	3.95836	2.16372	3.67125	4.70556	4.49763	4.20832
	CsaUNG033710	0.00869595	0.0434319	4.78043	2.73623	3.77079	3.64697	3.06567	4.44707	3.18432	2.4218	2.32945	2.89649	1.05786	6.16593	3.93127	4.22582	3.88744	3.41494	2.57444
	Csa3G175080	0.00404874	0.0238804	1.37868	2.92619	3.37179	3.27866	4.36373	3.72519	3.22406	1.66923	4.6662	3.64827	3.07652	2.56173	3.15967	3.51618	3.86993	5.73775	4.36909
	Csa6G091860	0.00726907	0.0378727	4.02532	3.21264	4.10912	2.91489	3.18292	2.47976	3.68436	5.00416	2.00243	3.34782	3.20326	3.82992	4.23937	4.79537	2.82624	2.75543	3.02954
	Csa3G002920	0.00152758	0.010914	3.42277	2.91841	2.49513	3.40069	1.87062	3.4474	2.83277	5.63685	2.72855	1.47533	3.31528	4.40403	5.21311	5.22398	3.39993	3.69676	3.29823
	Csa4G053250	9.38e-07	1.84e-05	2.82184	2.96046	1.9804	2.02394	2.05668	3.25668	4.5709	2.48751	2.44524	2.56188	1.55462	4.92224	6.20135	8.51031	3.05844	3.20722	4.33512
	Csa2G009290	0.00626368	0.0339228	2.28458	3.16463	4.14082	3.37584	3.7714	2.82872	2.1449	2.14038	3.26122	3.32968	3.86438	3.95043	3.92781	3.97345	3.91767	4.85449	4.03536
	Csa1G601000	5.3e-06	8.52e-05	1.57123	2.3819	2.99677	3.04302	4.55084	2.49732	3.34266	1.23326	4.11129	3.65979	3.1463	2.14423	1.99871	2.6327	6.6947	6.52609	6.571
	Csa7G446740	2.2e-05	0.000300907	2.68333	3.0371	3.79438	3.94747	4.20441	3.52719	1.64769	1.99849	3.83084	3.72256	4.36784	3.58638	3.05821	2.69601	5.08177	4.18316	3.92116
	Csa6G507240	3.76e-10	1.61e-08	2.93024	4.49632	1.68869	2.12462	3.25196	6.12423	4.33727	5.36145	3.02884	2.61701	1.80023	5.2637	4.99626	3.72718	2.69156	2.63392	2.25564
	Csa7G272120	1.72e-24	4.1e-22	5.05913	6.11023	1.58731	1.39973	1.53058	5.41174	4.06073	5.17948	1.05062	1.45482	1.42497	4.72388	4.55087	11.4531	1.38351	1.39524	1.57476
	Csa1G666460	1.45e-05	0.000207742	4.13449	4.24372	3.58801	2.22899	2.55566	3.55367	4.22332	4.99203	3.13781	3.11896	3.09957	4.53584	3.88045	3.20186	2.79802	2.90118	3.3102
	Csa3G182040	9.05e-07	1.78e-05	2.58143	2.74825	3.71059	5.07715	5.46688	1.95186	2.3052	1.55308	4.0757	5.37497	3.30474	1.98461	2.7912	3.18497	3.66338	5.56234	4.16979
	Csa6G522750	0.00164303	0.0115912	2.09532	2.76917	3.01947	4.30239	3.54992	1.50974	1.29538	3.56573	3.45203	4.50696	4.68204	2.55846	3.4739	2.29296	8.06517	3.75083	4.67349
	Csa3G877630	0.00554849	0.0308647	2.9704	2.07647	4.51604	4.48309	4.40343	2.5533	2.43561	3.41025	4.40435	4.00473	4.09381	2.93975	2.73846	3.7739	2.69152	4.0424	4.07232
	Csa4G043830	1.66e-05	0.00023465	2.78203	2.4189	3.62062	3.55084	4.59966	3.37021	3.48511	2.03872	4.73416	3.3881	4.42211	2.71161	1.97901	1.60234	4.27825	5.70334	5.01545
	Csa3G135690	9.92e-06	0.000147959	1.81122	1.76585	3.17992	2.17592	3.61566	2.60295	2.47812	2.61832	3.85227	3.36752	4.41628	2.86416	3.75627	2.89569	4.20792	7.23455	6.91832
	Csa5G512860	2.84e-07	6.27e-06	1.98136	2.24448	4.37719	2.69252	3.21872	2.52718	2.0314	1.69923	4.01447	3.47734	3.48039	2.81001	3.59279	4.43237	4.8834	6.64573	5.6761
	Csa7G452270	8.32e-05	0.000952884	1.19038	2.45346	2.24637	2.26766	3.96151	3.63052	1.3492	1.44696	6.07024	5.43131	3.1666	4.24515	2.83982	2.7367	5.61339	6.10709	5.05731
	Csa5G638300	0.00624423	0.0338463	3.13716	2.58693	3.10828	2.60391	2.0378	3.89401	2.76252	5.20003	3.35516	3.22189	3.5621	5.02161	3.81966	5.67654	3.34863	3.1199	3.46503
	Csa6G452710	0.00707044	0.0371013	2.11442	4.82948	1.26456	2.53857	2.33627	3.86397	6.13811	4.69336	1.36311	2.60659	1.34809	3.7043	3.18086	6.65754	2.60567	6.12552	4.61358
	Csa1G046900	0.000402124	0.00360682	3.83717	3.26486	3.2697	3.75076	3.12825	3.6701	4.03071	4.13704	2.76926	2.52323	2.6676	5.51459	3.48808	4.45924	3.06566	2.73541	3.69232
	Csa3G888520	0.0101096	0.0484827	3.37253	3.3906	1.84617	3.63303	3.11198	2.71931	2.23391	3.68952	1.78593	2.82631	2.52322	4.7651	7.13689	5.72206	4.60248	2.44362	4.20248
	Csa2G193380	0.000162289	0.00167916	1.83638	1.74593	2.94582	3.38329	3.43267	3.44295	1.96361	1.36976	3.72778	4.14054	2.76747	4.55323	3.62678	4.12536	4.28831	6.31745	6.40366
	Csa6G495060	8.7e-05	0.000989987	1.9879	2.99079	2.54612	2.2998	1.09007	5.45656	5.43162	2.43011	2.67561	2.18654	2.0822	7.02184	5.71904	5.00436	4.0246	4.16575	3.1388
	Csa6G037500	2.65e-06	4.62e-05	1.6068	3.04269	1.27242	0.585825	3.0981	3.71517	5.293	3.53393	1.68907	1.31306	2.00957	6.53012	7.83113	13.1993	0.981847	2.52812	2.03456
	Csa3G837560	0.000110706	0.00121886	8.11629	7.97037	3.47041	4.86874	3.6605	7.31006	1.95133	1.78754	2.64646	1.54299	2.87312	2.70698	3.00653	3.33796	2.13005	1.68159	1.43674
	Csa2G315390	0.0037604	0.0225565	2.25742	3.44095	4.36146	4.17052	4.1781	3.96386	1.81193	2.09102	5.08642	3.09738	4.33161	3.26599	3.28183	3.48024	4.1222	3.82972	3.85336
	Csa2G381890	0.000659562	0.00548503	2.51847	1.91383	3.54677	3.47723	7.77808	1.76423	3.58106	2.19162	2.85256	3.69351	7.69397	0.973796	0.635395	0.689007	1.14565	7.30514	8.92751
	Csa6G079220	2.65e-47	2.8e-44	6.83223	6.69051	1.10534	1.71937	1.13312	5.56868	5.11444	3.97961	0.915405	1.34136	1.49449	7.23679	5.60732	8.47818	1.3826	0.791345	1.34423
	Csa6G501950	2.33e-08	6.66e-07	2.86708	3.24532	1.77367	1.76687	1.55543	3.29426	4.46408	3.10077	1.85879	3.09734	1.81668	4.94868	6.86988	7.45075	4.5518	3.78414	4.39858
	Csa5G160120	0.000278179	0.00266429	0.971632	1.69502	2.78762	1.73366	1.64615	3.73383	4.18079	2.61552	5.18647	6.19385	4.68151	3.36937	3.10974	3.45254	4.69193	5.1793	5.71205
	Csa1G118890	1.78e-07	4.16e-06	3.31607	2.94977	5.54166	4.59051	5.5221	3.60783	2.0238	2.54863	4.99044	3.38071	4.03741	2.3879	1.34841	1.2452	4.23979	5.01721	4.19937
	Csa3G183330	0.00701032	0.0368772	4.44008	3.76035	3.58944	3.73076	3.48152	3.17223	3.28355	3.78233	3.22926	3.1322	3.23783	4.18623	3.46393	4.91136	3.09753	3.74493	2.71984
	Csa3G075990	1.81e-05	0.000252899	7.21282	5.42472	3.26369	3.62867	2.94783	3.76104	3.96043	7.08428	2.38444	2.81464	3.47926	1.85413	2.97591	4.12376	1.52764	1.91913	2.64602
	Csa6G404180	3.04e-05	0.000396803	1.84473	2.27087	3.71274	2.74925	2.55197	3.71601	2.26252	2.31304	4.88966	3.49087	3.67748	2.97909	2.99195	3.47629	7.6212	6.15473	4.37291
	Csa5G608070	0.000503035	0.00434634	2.45173	2.82211	3.75583	3.21988	3.51729	2.94425	2.98255	1.8353	4.29981	2.80949	3.50687	4.15248	2.70797	3.10555	6.50353	5.89897	4.59904
	Csa2G347140	8.13e-08	2.07e-06	2.81685	2.4177	3.58714	4.3789	2.7661	3.36382	1.75118	1.82591	4.86113	5.72354	3.75814	2.53638	3.04575	2.32483	5.60019	4.50721	6.1299
	Csa3G337350	2.91e-06	5e-05	1.0756	0.888442	3.34658	2.95109	3.32189	2.90626	0.748082	2.08001	7.9742	5.52103	5.91474	5.69116	1.64758	1.64441	4.89287	4.81356	6.31895
	Csa3G099600	0.000140633	0.001493	1.37047	2.18237	2.29574	3.29286	3.7112	3.12969	2.20844	2.73714	4.636	3.82209	3.95345	4.30694	3.91108	4.20854	4.69338	5.94329	5.34218
	Csa3G914030	0.00367502	0.0221699	2.98886	2.4558	3.43899	2.50609	2.87336	2.12523	2.18817	3.51359	5.58826	3.0376	4.20164	3.88961	2.67894	2.08855	6.15135	7.86127	4.18222
	Csa1G575090	0.00695418	0.0366639	4.41425	5.69402	3.14891	2.05512	4.80225	3.55822	3.6449	4.59561	2.91397	2.80827	3.4519	3.61793	4.15182	3.4157	2.31697	3.15717	4.11845
	Csa6G312040	1.61e-11	8.71e-10	1.2676	2.43898	0.293051	1.02951	0.868511	2.59677	6.43065	7.18091	2.02695	1.96838	1.56203	7.82999	8.22364	11.5917	3.05274	1.70556	1.87102
	Csa3G829010	2.58e-10	1.15e-08	2.10359	2.26771	3.62078	4.22371	3.62573	2.45242	1.85107	0.83735	5.35028	5.28439	3.47394	2.21234	3.35369	3.26177	5.19026	6.6731	6.34808
	Csa4G051360	0.000683487	0.00565441	4.50533	3.86221	5.34389	2.80201	3.18042	3.31447	6.28577	5.98102	2.35715	2.02388	3.061	4.65865	3.90593	3.09613	3.23824	2.54301	1.98844
	Csa6G028940	5.5e-22	1.05e-19	4.85753	5.73188	1.22727	2.21102	1.4206	5.3889	4.16137	5.79719	2.74381	1.67355	1.4537	6.21367	6.5028	7.63857	2.67105	1.10419	1.4925
	Csa3G853170	1.26e-32	5.12e-30	7.33704	7.73275	1.93911	2.07141	2.50774	7.86295	6.82545	5.73827	2.78286	2.06579	2.5779	3.45878	4.41852	3.07145	1.02371	0.554179	0.388407
	Csa2G258810	0.0022806	0.01519	2.22777	2.96722	4.03573	5.54543	3.24356	4.01296	1.93678	2.01943	4.30108	4.08398	3.42725	4.1653	2.93573	3.15942	5.4081	4.56951	4.492
	Csa2G062630	1.39e-06	2.64e-05	1.34085	3.0626	7.38911	2.75528	4.07423	3.8155	3.8384	1.89399	9.50853	3.9614	4.67134	1.38809	0.945529	0.816226	4.68173	4.72515	3.79642
	Csa3G642640	0.00911941	0.0449698	3.82983	2.4185	4.11194	4.69081	3.71196	4.54356	0.959492	0.949668	6.83121	4.10684	3.46154	4.05411	3.50653	1.74463	5.8361	4.39237	3.69048
	Csa1G598880	0.00494908	0.0282219	5.88285	4.46034	5.00369	5.59523	3.44004	3.92773	3.4198	3.97325	3.33614	3.00464	3.77072	3.35037	4.15357	2.69182	2.58085	2.44498	1.88847
	Csa6G487770	0.00362862	0.0219455	0.713933	3.3334	1.51369	0.399077	1.07428	6.00147	4.35564	2.35432	3.11075	1.54299	2.20404	6.35452	8.04451	5.71444	5.28568	6.61427	4.37757
	Csa1G470460	0.00898911	0.0444767	3.79966	3.8821	2.06768	1.67629	3.03303	3.08878	4.2825	8.47831	4.11711	1.48599	4.77588	4.13989	3.91881	4.34622	3.74329	3.31368	3.14318
	Csa6G062290	1.35e-15	1.29e-13	7.26332	6.92382	4.19994	3.35879	3.34872	3.29699	4.31849	6.734	2.31883	1.59697	1.63805	4.32831	4.88498	4.42947	1.67818	1.93545	1.07966
	Csa5G623840	0.00881852	0.0438374	3.10109	3.16332	4.2598	2.68602	3.76191	3.18172	2.54072	3.63311	3.57137	3.8562	4.44655	2.46309	3.54841	3.22693	4.7725	5.95847	5.18041
	Csa5G470560	1.98e-14	1.61e-12	0.863175	0.320842	0.212025	0.200539	0.11425	0.97179	1.90108	2.06567	0.46662	0.764817	0.310791	11.6595	14.4956	20.3678	1.699	3.16545	3.80326
	Csa4G295520	5.26e-18	6.69e-16	2.13574	2.47905	4.07263	4.58137	5.57936	2.76726	2.21509	1.40207	6.23283	7.40464	3.84124	1.47547	1.8687	1.84515	6.04756	4.73706	4.78491
	Csa3G150770	0.00412674	0.0242879	4.30542	3.69652	3.87275	4.28284	4.01315	3.42261	1.12467	1.47756	5.28241	3.70551	3.49339	3.70217	3.50785	2.66414	5.50637	4.91495	4.78218
	Csa7G407700	3.59e-14	2.81e-12	2.47039	2.88504	5.55143	4.96169	3.96263	2.84916	2.17747	1.47576	6.10494	4.75891	3.76606	2.71778	2.24798	2.50345	4.82718	5.54604	5.08531
	Csa5G099490	2.66e-17	3.25e-15	0.555422	1.31281	4.36579	2.76798	2.75968	2.001	1.90178	1.83421	5.70151	4.01016	4.83315	2.6606	2.35603	2.434	7.17616	10.9199	6.48348
	Csa6G490900	2.75e-13	1.88e-11	4.11227	4.6496	2.82223	2.919	3.36975	5.01282	5.07824	5.82643	2.27251	3.21245	3.09522	4.97077	4.66988	6.06585	1.84391	2.21951	2.09881
	Csa6G018600	0.000792935	0.00637379	2.59876	2.17959	3.29538	4.57651	3.31625	3.89435	1.13287	2.39679	5.26947	4.29988	3.6759	4.66485	3.72256	2.91681	7.01841	5.30146	4.00757
	Csa7G392940	0.000278692	0.00266786	2.40672	2.5917	5.1381	2.0512	7.8341	4.03201	1.98386	2.9304	5.25005	5.63577	4.9484	2.61218	3.11633	1.66402	3.5558	4.75742	3.90534
	Csa5G622600	0.00741944	0.0384565	2.19144	3.14741	1.88952	1.75747	2.22577	4.67257	2.48842	4.56651	2.81832	3.32322	4.02865	5.78854	4.7874	8.16179	3.09864	4.58117	4.96984
	Csa5G286050	0.00146261	0.0105406	2.50053	3.57199	4.11887	4.21794	6.15219	3.97437	2.38704	1.28001	4.81632	5.03341	2.54211	2.78384	3.65798	2.5565	4.40069	5.33926	5.18478
	Csa7G388310	0.000266649	0.00256805	4.5069	3.8666	3.34906	2.77545	3.08795	3.00177	3.05554	4.3065	3.18219	3.4437	2.7372	4.90192	5.28264	6.18026	4.09506	3.27684	3.57506
	Csa4G646130	1.05e-18	1.43e-16	4.06832	6.43545	2.21767	2.10123	2.86209	6.39143	4.4704	4.13847	2.41016	1.74363	2.18902	5.30781	6.05604	8.17947	1.69661	2.74348	1.66478
	Csa1G042720	0.00172431	0.0120575	2.72905	1.82385	2.43763	3.57913	2.82407	3.07866	2.3582	2.42285	4.52165	4.95239	3.42154	4.79645	3.57674	5.09057	5.77313	6.18883	5.11367
	Csa5G148560	2.36e-06	4.17e-05	1.85744	2.30136	3.94756	2.93765	4.95978	3.56406	1.94714	3.49044	6.38634	3.55312	5.07533	3.13082	1.8119	1.54008	3.87855	7.85068	6.48938
	Csa1G637440	0.00222264	0.0148871	0	0.233034	0	0	0.373421	0.705831	0.10901	0.272788	1.30725	1.72397	1.23128	1.14828	0	0.567528	21.2251	14.6131	21.3499
	Csa3G462680	9.49e-10	3.75e-08	2.24194	3.54495	1.94055	0.680313	1.63916	4.6154	4.70258	4.89293	3.29785	1.87883	1.62143	8.53836	5.42541	9.63841	3.41819	3.29132	3.69936
	Csa6G476690	1.6e-05	0.000226454	0.881827	2.80621	3.87613	3.94342	2.45725	3.4556	3.22797	4.14656	6.88172	6.53436	5.10441	2.66352	2.1077	2.91294	4.57983	4.84645	4.71382
	Csa2G000470	0.00579044	0.0319424	1.36044	1.55916	1.83794	2.61885	2.83608	4.16091	1.47842	1.06056	6.27745	4.07348	2.56049	7.13774	4.367	3.85874	6.78367	6.55338	6.62925
	Csa7G033380	0.000467158	0.00409198	2.51683	4.36077	4.4395	3.4939	4.67954	2.80824	3.16094	1.90851	4.75048	3.72016	4.19303	2.97635	3.40704	3.21476	6.55318	4.67092	4.33337
	Csa6G495030	5.36e-31	1.89e-28	6.65931	6.77958	2.42925	2.76006	3.43973	6.17661	5.32192	6.51225	2.16302	2.15265	1.9092	3.94444	3.94171	5.73308	2.17868	1.84861	1.81137
	Csa7G307400	8.29e-07	1.64e-05	3.43811	2.54177	4.03129	3.81291	4.24397	2.55483	2.39562	3.32802	4.88192	4.12292	4.49652	3.06157	2.48517	3.31978	5.02498	6.87618	5.22028
	Csa2G009450	2.05e-05	0.000283423	2.54747	3.34669	4.35042	4.23016	3.7679	3.69049	2.26862	2.43971	4.49673	4.01278	3.70598	3.85116	3.23541	3.65064	6.28234	4.24253	5.72547
	Csa6G409930	0.000145465	0.00153252	4.91359	5.22671	3.80728	4.45488	3.08792	5.37296	4.18611	4.17161	3.2578	3.8667	5.23035	4.58512	3.6283	4.51304	1.50969	1.78777	2.29118
	Csa3G722890	0.00225625	0.0150541	6.02686	5.18893	5.16521	3.92467	3.86632	4.96593	3.77355	3.47094	3.39732	3.0753	3.50196	3.89437	4.28098	2.71857	3.80993	3.10623	1.76092
	Csa1G042540	2.62e-05	0.000349662	1.49967	3.40237	4.06026	2.76077	3.70528	3.68191	2.22512	1.16004	5.18848	5.01782	4.01428	2.116	3.99978	2.18817	6.26222	9.04796	5.65453
	Csa5G167210	0.000178989	0.00182521	1.03151	4.55146	9.77533	2.40311	15.2562	3.75613	1.60455	1.31268	4.15259	4.09914	5.82042	0.690699	1.22326	1.67072	1.99103	3.50769	3.18072
	Csa6G501310	2.99e-05	0.000393057	0	1.0842	3.46301	0.25816	0.772158	3.06498	2.36681	0.705089	7.80901	4.63427	4.07364	1.484	1.44554	1.52559	6.12406	15.7128	11.7629
	Csa3G840450	6.38e-05	0.000759375	2.41762	3.30109	4.07213	3.24891	4.85875	3.2588	2.51648	2.63341	5.3649	3.93153	4.49613	3.3436	3.92112	3.59691	4.8169	6.5015	4.09734
	Csa3G824990	5.57e-07	1.15e-05	1.05893	1.39948	2.58183	1.16631	2.8655	2.54331	1.23657	1.00114	5.08837	2.76087	3.73827	3.7832	4.4951	4.9988	11.2398	9.51694	6.93568
	Csa3G902960	2.44e-05	0.000329707	1.63103	0.524326	5.71719	2.10681	3.82756	2.59393	1.14461	4.44986	5.28345	8.14578	5.72543	2.58363	3.38414	2.63901	3.47067	6.7951	6.47872
	Csa7G398160	0.000332828	0.00308242	0.839118	0	0.224854	2.59259	2.26171	0	0	0.0885111	0.0942576	3.43083	2.47696	1.95604	1.23723	3.16729	28.8287	4.93115	14.4016
	Csa7G000520	8.85e-09	2.76e-07	0.958684	2.01638	4.31915	2.95523	4.72905	3.03262	1.34438	2.25184	6.44292	3.65782	5.24122	3.45467	3.33731	3.81564	5.20379	7.46451	6.37017
	Csa5G622560	0.00180795	0.0125366	3.73492	3.45661	4.62261	4.51465	3.75821	4.33654	2.04751	1.38867	4.94642	4.45868	3.32852	3.8046	3.34676	2.07217	7.38669	4.43263	5.05454
	Csa6G451500	0.000102011	0.0011389	4.68147	4.70817	3.32078	3.95339	2.39394	3.34573	4.00248	6.06781	2.59599	3.90731	3.70755	4.46147	4.59274	5.42441	3.14045	2.7253	3.68372
	Csa1G051690	0.000286673	0.00272239	0.916902	2.30704	4.01936	0.898905	3.21142	3.81149	2.1584	2.4551	7.93062	2.89628	4.43259	3.35872	1.8303	2.0431	7.99642	10.5916	5.9836
	Csa1G597130	1.47e-13	1.04e-11	2.78858	2.51276	5.30186	6.00027	6.36575	2.13104	2.25012	1.76486	5.86206	5.87776	6.10725	1.54771	0.861482	0.31472	5.36049	6.08673	5.88514
	Csa5G606670	1.44e-07	3.42e-06	5.37443	4.19969	3.15717	3.80535	3.58316	4.61006	3.71816	3.89332	2.81091	3.05826	3.84226	5.10407	5.13473	5.49148	2.98513	3.25217	3.12596
	Csa1G151000	5.88e-05	0.000706311	2.68289	4.78671	10.5442	6.89042	7.85115	2.05027	3.07601	2.49035	4.0986	4.19696	8.07281	1.07212	1.42408	1.55433	2.35554	1.2613	2.73945
	Csa2G000710	0.000390133	0.00351913	2.34538	3.39962	4.83186	3.69626	6.46241	2.57426	3.20398	3.83327	3.89517	3.42733	5.9963	2.49428	2.5905	2.77603	3.78581	7.22317	4.67075
	Csa1G538270	0.00771277	0.0396321	2.83758	2.58456	3.64202	4.42554	3.43778	4.1444	1.68315	1.98732	5.05396	4.52392	3.45415	5.24401	4.45022	3.67791	7.11153	4.22025	4.73458
	Csa3G125520	0.00802616	0.0408463	2.66177	3.5018	3.51875	5.29417	4.91958	3.37084	3.23131	3.31304	5.26231	3.5961	4.20739	3.95924	3.29669	3.31784	4.52158	5.5349	3.87442
	Csa5G523090	8.84e-41	6.48e-38	9.15529	10.9134	0.82311	1.2075	2.28103	7.68894	9.54437	7.56789	0.591503	0.526543	0.438738	4.31084	4.78787	6.5868	0.125633	0.416565	0.428999
	Csa4G049110	0.00130176	0.00959541	0.503203	1.9951	1.73046	2.13775	2.66417	1.6618	2.56652	5.25477	8.70478	5.53486	8.69669	2.61133	0.544094	4.37296	5.28245	7.1312	6.01268
	Csa1G425890	0.00921462	0.0453103	3.4335	4.89656	5.09474	3.98151	5.37933	3.23969	3.34647	1.82933	5.23821	3.83654	3.1193	2.90904	3.75039	2.84171	5.36977	4.77349	4.39567
	Csa3G221740	0.00669858	0.0357002	3.62117	4.08683	4.43862	4.41712	4.36591	4.04723	2.59335	3.24482	4.0757	4.34671	5.40776	3.23958	3.17887	3.32345	4.5165	4.38569	4.19835
	Csa5G635950	0.00440009	0.0256199	0.756701	2.25012	4.88577	2.87025	6.41008	3.11559	2.2054	2.38313	9.21641	2.53658	5.43493	4.22382	4.09096	3.54891	3.85831	5.59029	4.13334
	Csa4G293270	2.91e-09	1.03e-07	5.24716	4.86452	4.37734	3.09436	3.6991	4.89153	4.55112	3.00309	3.09321	3.18045	2.50359	4.78365	5.94881	5.35335	3.05851	2.68651	3.21091
	Csa1G612830	2.05e-06	3.68e-05	4.29511	3.53573	2.00276	3.09268	2.46673	8.04289	4.79312	8.86909	3.95786	2.91821	3.50757	5.9556	3.46342	7.31046	2.5219	0.506786	0.521913
	Csa3G903550	3.44e-17	4.1e-15	8.07765	8.27264	1.70241	1.6847	2.5324	10.1106	13.2615	7.33372	2.6837	1.16913	1.94266	2.20505	3.48306	1.31958	1.33215	0.339774	0.320756
	Csa6G487640	2.83e-31	1.04e-28	7.29277	6.53685	2.77703	1.96415	2.62333	7.5845	6.82759	5.34426	1.20723	1.5011	1.38885	7.49874	7.92312	4.04312	1.50184	0.971648	0.958957
	Csa4G152260	5.28e-10	2.22e-08	5.65538	4.71864	3.85095	3.34534	3.24056	4.14796	3.75078	4.13234	2.52096	3.21961	2.68064	4.69832	5.22479	6.63583	3.21265	3.09691	3.89198
	Csa6G503370	2.61e-10	1.16e-08	1.59682	1.58277	5.21006	3.26388	9.63467	2.78596	1.50874	3.35599	7.07328	4.41859	8.77309	1.83942	1.04247	1.4255	3.32095	7.67054	3.88803
	Csa1G690370	1.35e-05	0.000194812	7.45891	8.52904	5.14068	4.61536	4.62441	5.81576	4.99222	2.45839	4.62156	2.83251	1.99281	3.08867	3.36627	2.79737	1.77028	2.23612	2.06667
	Csa2G416200	1.19e-32	4.92e-30	4.85944	4.58172	1.33921	0.440579	0.251005	8.18414	5.49555	4.46945	2.0503	0.869111	1.3656	9.55159	11.598	8.75495	1.7419	1.827	1.3454
	Csa7G235750	0.00017538	0.00179321	2.24152	2.42076	4.43763	3.0913	4.35735	4.4194	2.48197	2.79491	6.57282	4.18687	4.41536	4.98376	3.14715	2.97198	6.18121	5.92234	4.15745
	Csa6G507370	0.00182771	0.0126507	1.31194	0.382468	1.09947	0.655704	0.163434	1.89986	2.18274	2.73107	0.762853	2.60312	0.606251	8.48079	16.4802	16.1329	3.6051	2.91644	6.77761
	Csa4G126430	0.00174855	0.0121912	1.55905	1.57505	3.15203	1.01897	2.85725	1.29617	2.86374	2.29599	3.00074	6.03859	4.93042	3.18497	1.75058	1.79489	2.6438	12.0758	16.8734
	Csa1G004110	1.34e-08	4.05e-07	1.59348	1.01536	5.14428	4.11007	5.06193	3.41712	2.63874	1.71684	7.59447	5.2303	5.00719	3.47445	1.84603	3.40697	5.73523	5.3201	6.66405
	Csa5G224130	4.05e-10	1.73e-08	0.710235	1.38089	3.67704	1.59568	5.11978	2.62435	0.607965	1.45799	5.40051	3.01799	4.52077	2.03464	2.24478	3.29707	11.0116	13.6647	6.69125
	Csa2G370580	0.00869068	0.0434276	1.03139	1.36309	2.89538	1.14757	2.6003	4.30557	4.50899	3.76112	4.9156	3.98561	5.14437	5.69715	3.1863	2.94026	6.75412	8.10808	6.92488
	Csa7G390190	3.65e-05	0.000464418	1.60396	3.46025	1.94676	1.10228	2.79738	5.212	7.08709	8.32005	3.96378	2.85968	3.75539	6.79713	4.59079	7.10605	3.16947	2.34579	3.49487
	Csa3G133370	0.000351459	0.00323298	0.435562	4.65308	5.99139	1.79899	2.76726	1.51107	1.34638	0.617686	5.14271	3.54879	4.96776	0.590931	1.30821	0.981332	5.79168	9.67405	18.5625
	Csa2G416170	4.8e-29	1.58e-26	5.55207	7.98431	1.3869	1.21932	1.67402	5.01751	6.91141	7.0098	1.23252	2.28174	1.83334	5.37747	8.50628	6.81481	2.21281	2.93858	2.1364
	Csa3G171850	2.78e-05	0.000368714	2.50624	1.24209	6.56661	4.14059	9.28839	3.67854	1.80766	4.03886	6.02151	3.94784	8.3129	2.55018	1.5055	1.34444	2.4848	5.81574	4.99111
	Csa4G627230	0.000117549	0.00128382	1.81849	2.66276	4.58867	3.77494	6.56446	3.5735	2.22293	4.26792	6.28131	3.51551	5.67096	3.4316	2.72596	2.9132	4.20845	7.80939	4.247
	Csa4G641570	0.010374	0.0494433	3.62662	3.25979	4.84696	3.4211	4.10254	4.16581	3.25866	2.77045	5.31613	3.67793	3.68067	3.76813	2.8253	4.43706	5.91164	6.25007	4.97935
	Csa2G350420	4.96e-09	1.67e-07	1.99448	1.69451	3.9753	3.51029	2.71534	2.32672	2.32516	1.78523	5.84422	3.56577	4.41693	3.20073	1.47878	1.3756	11.6651	8.27409	10.2136
	Csa6G349840	0.00104746	0.00804201	2.28698	2.01892	1.7204	2.01146	1.40002	3.13262	4.57299	7.09001	2.87	4.99609	3.8552	7.06849	7.57302	7.65994	3.03851	4.54881	4.69678
	Csa4G102320	6.52e-07	1.32e-05	5.54988	6.23126	3.90877	4.12084	4.10848	5.30823	4.60008	6.3825	3.15569	4.03363	4.37271	3.23838	4.30151	4.36297	2.68102	1.85607	2.4061
	Csa3G346920	1.18e-06	2.28e-05	4.99222	4.13856	2.5863	2.21724	2.01836	3.70606	3.70358	8.0041	2.24309	2.12987	2.75712	6.20652	5.69232	10.1667	1.61984	4.15235	4.33826
	Csa3G088430	0.00349795	0.0213175	3.4117	3.27841	5.04098	5.14476	4.88114	3.75304	2.80153	2.81028	4.56956	4.4815	3.57353	3.59341	4.25213	4.75281	4.64773	4.76565	4.97902
	Csa6G513520	0.00763096	0.0392965	5.17186	4.75486	3.79275	4.09975	3.69062	5.04066	4.34426	5.26163	3.24154	3.55427	4.47506	3.98122	3.12024	4.81292	3.42278	3.72711	4.25418
	Csa5G211570	2.22e-08	6.39e-07	2.46272	2.33672	2.93674	4.09103	5.08174	3.43771	2.14714	2.36902	5.12367	3.86899	5.07088	4.49775	3.73253	3.53645	5.74505	7.64058	6.71529
	Csa5G263270	3.91e-05	0.000494193	2.97302	2.93282	4.36775	3.92439	4.09251	4.25031	3.57097	1.90548	5.14295	3.90336	4.06309	3.92404	3.184	2.81602	6.07847	7.43391	6.5635
	Csa5G161960	0.00657693	0.0351994	3.11929	3.31268	4.00615	4.16479	4.64774	4.81617	2.78933	2.22328	5.80893	4.37859	4.17741	4.65213	4.38459	3.39917	5.98769	5.16283	4.09989
	Csa1G612320	2.29e-44	1.99e-41	4.80415	6.5608	1.18007	1.38897	1.2435	11.1218	12.3752	11.3033	1.58297	1.56569	2.01281	5.31204	5.25226	3.27293	1.31684	0.610488	0.318911
	Csa3G733980	7.46e-25	1.87e-22	4.93509	3.2611	1.24331	0.358387	1.33992	6.33172	5.51527	5.87297	0.938141	1.07224	1.50216	11.1763	7.5253	16.3729	0.974146	1.17455	1.66321
	Csa3G199680	0.00248419	0.0162731	2.68061	5.31404	4.87254	6.5481	7.38	2.57529	2.85871	1.71066	4.80274	6.42113	4.21165	0.981939	3.18829	4.14137	4.50243	5.06515	4.00377
	Csa6G516820	0.00392083	0.0233208	5.4044	6.61375	5.33969	4.23274	4.60369	3.80703	3.33181	6.79617	2.83527	2.33202	4.30091	3.13359	4.4398	4.60618	3.6132	2.82246	3.21077
	Csa5G285030	0.000586678	0.00495674	1.23366	6.41971	4.09089	0.655116	1.3063	4.07409	8.00814	6.62025	4.00139	2.41233	2.58435	6.21367	6.5028	8.63619	2.75199	1.53359	4.42223
	Csa5G157920	0.000458502	0.00402911	2.90104	2.89987	3.11609	3.00277	3.56649	4.66478	3.89857	3.76542	3.06817	2.04315	2.93564	6.27403	6.69888	9.9466	3.9229	5.03667	3.73078
	Csa3G026160	8.81e-06	0.000133977	1.90968	1.55883	4.04698	3.89734	4.12355	0.989269	2.29177	1.82476	4.44168	4.50304	6.35377	0.731541	0.566823	0.578494	2.83018	18.4331	12.3935
	Csa2G354000	0.00135649	0.00993351	3.08728	2.27463	4.62306	2.87562	4.4928	3.90574	3.53659	2.87339	5.58949	4.05154	4.15024	3.95112	3.30246	3.88968	5.06069	9.32584	4.55692
	Csa1G612330	3.89e-08	1.05e-06	2.99863	5.16911	2.56197	1.66161	3.03716	8.298	9.06766	5.89967	4.67175	3.18674	3.41399	3.97983	7.75334	6.42029	1.23177	1.42624	0.778915
	Csa3G431430	1.15e-20	1.87e-18	5.03448	6.009	2.65878	1.71549	1.79919	5.3405	6.2638	5.01393	1.5811	2.68674	2.37298	7.37675	6.55499	11.6466	1.58551	1.75238	2.23079
	Csa5G576760	9.37e-14	6.74e-12	8.78188	5.85183	4.87621	5.23173	4.39554	5.98201	4.75624	5.28744	2.27964	2.52534	2.51218	3.73954	5.70528	4.89895	2.26599	1.33939	1.30064
	Csa7G432360	0.00310459	0.0194294	5.92746	4.20531	4.25134	3.13142	3.12203	5.48121	4.92152	3.02116	3.21731	3.95342	2.78345	4.08637	7.30343	4.25931	2.33141	5.25511	4.55703
	Csa7G452320	1.33e-07	3.19e-06	7.87847	5.59248	4.85822	5.60012	3.9105	3.67113	4.77555	4.6897	3.24494	2.86852	2.98712	3.88304	6.32246	4.39798	3.07992	2.12202	2.10831
	Csa6G012820	1.93e-07	4.44e-06	0.810242	0.401556	2.68018	1.54896	5.74829	3.79474	1.20219	2.63233	7.07483	9.11011	11.4005	2.57227	1.69376	0.312942	4.93327	10.7438	5.51842
	Csa4G044980	2.31e-05	0.000313818	2.93164	2.90584	5.52735	4.29173	7.80264	4.66238	1.83691	1.83868	5.38466	4.49313	5.64346	3.38615	3.16987	2.3717	6.48778	6.30383	3.40829
	Csa5G635440	0.000741546	0.00603871	2.44822	2.28393	2.68846	3.55613	3.96482	3.15622	3.47227	2.42291	6.31708	4.3297	3.80881	4.30821	3.69824	5.87513	8.01253	6.55235	5.63557
	Csa6G311520	0.00285957	0.0182432	7.37169	7.70536	3.29226	3.4164	3.26423	6.11632	6.96034	2.64375	3.80907	3.53817	2.3866	3.60044	2.46368	5.17671	3.65822	4.26539	2.88271
	Csa5G464810	0.00329451	0.0203376	3.11828	2.67316	4.26452	3.26708	4.19431	4.14954	3.43878	4.20484	5.20679	4.11998	5.78205	3.39591	4.37407	3.62129	4.99867	6.32798	5.58897
	Csa4G314400	0.00698917	0.0368065	3.65051	3.61838	7.17353	4.98484	5.79821	4.69698	1.45083	0.302547	8.05474	3.05927	2.73119	4.13902	3.10133	2.01421	6.02199	5.44565	6.54289
	Csa1G489250	9.4e-29	2.94e-26	5.9362	8.52904	1.1237	0.462728	2.3067	6.6709	7.27249	8.84663	1.8842	0.905195	0.969746	6.45035	7.53742	9.25517	2.00098	1.2457	1.43163
	Csa4G047970	0.00405931	0.0239354	0.996816	1.52987	3.0646	2.08323	1.97483	3.70704	3.57827	1.08198	3.57587	4.7158	3.26702	6.08575	5.11094	6.02344	9.28278	9.6575	7.14646
	Csa5G146850	5.41e-07	1.11e-05	2.26075	3.10272	6.11705	5.13461	5.37702	3.38319	2.90282	3.43025	6.70426	4.2507	7.35898	3.48243	2.48207	3.05612	3.35908	5.32678	5.3611
	Csa6G502850	4.44e-07	9.35e-06	2.60751	1.6745	6.49515	3.84199	6.94151	5.57905	2.4521	2.57804	8.78081	4.64995	5.34698	3.1166	2.38259	1.96811	5.06973	5.62461	4.10302
	Csa6G497190	0.00541251	0.0302631	4.57202	2.78879	5.15449	6.28764	4.99641	4.15305	2.60911	3.23054	5.25095	5.01456	5.00377	3.75752	3.70766	3.76378	5.23027	3.14783	4.62255
	Csa5G409690	0.000884963	0.00699062	2.8417	4.63306	5.76681	3.38477	5.63842	4.67234	3.18935	2.34194	5.64429	5.81639	3.04604	2.46455	3.40285	2.79518	6.66322	4.92581	6.07698
	Csa6G487670	0.00919152	0.0452201	3.93594	4.66362	4.22281	2.78683	3.40123	4.07467	4.27925	3.30702	4.19253	3.40589	2.93797	5.08213	5.96787	6.59622	4.93917	4.36421	5.24355
	Csa1G038950	0.000149424	0.00156558	2.89093	2.44409	3.4531	3.49179	4.77182	3.60783	2.68087	2.59796	4.90289	5.32047	4.77959	5.53715	4.07586	5.00816	5.59355	6.34198	5.9604
	Csa2G406060	0.00183385	0.0126748	1.18021	2.44598	3.79504	1.70926	3.74911	2.70574	2.78587	2.61428	2.78401	6.92341	4.60761	1.17906	4.29237	5.07634	5.18102	10.6701	12.0508
	Csa1G420310	0.00139452	0.0101515	5.07999	2.27854	4.48937	2.71273	2.97505	1.94262	4.4477	4.05026	0.455869	2.60825	1.69438	5.64842	10.7401	13.6467	2.41317	2.8506	5.86653
	Csa7G063920	1.75e-05	0.000245924	3.96899	8.75984	3.27573	0.955478	7.11658	8.51581	7.3612	3.37714	2.02706	1.75917	2.49435	4.5232	8.75469	4.54777	1.49994	2.52618	2.71902
	Csa4G288620	0.0102507	0.0490394	1.80969	4.33974	4.26358	2.37668	3.04952	4.9073	2.61654	1.98688	5.21755	3.13918	3.72991	3.0413	2.86148	3.47601	7.88497	11.0887	8.39368
	Csa5G550250	0.000445155	0.00393248	1.44315	2.77149	4.38678	2.53857	4.10685	4.33265	2.50929	3.19197	6.01826	3.30699	5.66851	4.79081	2.82826	4.6159	7.10141	8.70097	5.92759
	Csa5G537540	0.00314789	0.0196231	3.1674	3.74999	4.4088	5.046	6.05568	4.5433	2.77407	1.73547	5.76186	4.2151	4.7	4.08238	4.85178	2.80352	4.89518	5.68746	5.78213
	Csa6G497160	0.000914343	0.00716925	2.58184	3.33709	2.94264	5.46226	5.53337	5.06002	2.24101	1.43793	7.78406	5.65443	4.02402	5.14493	3.55098	2.73231	5.61581	5.21745	6.14532
	Csa7G433230	6.12e-06	9.67e-05	0.741791	0.791821	6.95199	3.81796	6.04209	3.15209	1.90493	3.44278	8.46069	4.51891	7.76977	1.39347	0	0.165291	10.1232	7.26361	7.97717
	Csa2G005270	2.36e-06	4.17e-05	2.60312	3.75087	4.09701	5.17101	4.56849	3.70496	2.05635	2.82462	6.43297	5.13734	5.20074	4.32631	4.03955	4.07285	5.66776	5.34541	5.52964
	Csa2G263880	0.00035981	0.00328074	1.61799	2.25983	5.05826	5.31148	3.58229	4.76924	3.88747	2.98668	5.54332	5.17723	5.00719	3.95126	2.86277	4.89995	5.63597	6.72893	5.44841
	Csa1G064810	0.00876891	0.0436705	4.19878	3.99968	3.3218	4.054	2.77155	4.51839	3.59029	3.98603	4.44695	4.21183	2.1133	5.06029	7.13425	7.42405	4.40773	5.58566	3.90938
	Csa2G352960	1.72e-12	1.06e-10	2.20635	3.11217	6.00321	5.29946	6.1462	4.03551	3.2107	2.93417	5.85089	7.48375	5.83085	2.81838	3.3399	2.06486	4.06217	4.8104	5.63769
	Csa3G124940	2.02e-07	4.64e-06	3.27082	3.37806	3.12381	2.98799	2.59151	5.49355	4.00886	4.83014	3.81541	3.77936	3.30618	6.89837	6.52912	6.95697	5.28245	4.57216	4.09955
	Csa6G485110	0.00011216	0.00123201	7.061	5.52084	4.39531	6.84717	5.1548	5.63542	3.94503	5.80113	2.49278	2.9587	4.54781	4.177	3.79368	7.07206	2.57822	1.48294	1.46731
	Csa6G497070	0.000121899	0.00132495	3.68664	2.42317	5.07374	4.08208	4.99732	3.37538	2.53376	3.13993	5.29836	3.33605	4.62834	3.3522	4.38201	5.11241	5.5993	7.94378	6.2015
	Csa1G076610	0.00256116	0.0166856	4.61774	5.04598	4.42645	5.04791	4.38877	6.22166	4.78354	4.20794	4.84297	4.75708	4.62444	4.07068	4.23795	4.37181	3.38146	3.29305	2.85303
	Csa7G452340	0.00126876	0.00938481	4.50283	5.0391	4.39566	3.42476	4.55266	5.30274	4.06789	5.52797	3.84082	4.34567	3.834	5.037	4.39757	4.88082	3.99501	4.42029	3.71418
	Csa4G056700	0.00133714	0.00981823	5.1159	3.94863	3.54331	2.80579	3.64103	3.72646	4.3553	5.15746	4.97416	3.03392	3.82127	5.12025	6.66515	6.15453	4.49008	4.46222	4.35919
	Csa7G395210	0.00282522	0.0180665	2.66601	4.37387	3.07108	4.58896	5.35396	4.02957	2.87724	2.42668	5.73642	6.40412	4.52573	4.82682	4.15002	3.95014	4.94595	5.71411	5.73951
	Csa5G608570	0.000130094	0.00139807	0.163382	0.539813	0.963172	0.404887	2.19137	3.46625	1.91913	4.61289	5.5853	4.04676	7.58684	5.18688	2.82653	4.15431	7.14635	15.0568	9.56587
	Csa7G393980	0.0065171	0.0349694	2.51234	3.00903	2.46847	2.44593	2.54944	5.53124	6.8923	6.31595	5.82058	4.40096	5.15338	4.21804	5.54618	8.38948	2.41759	3.53958	4.25276
	Csa5G512850	0.00138461	0.0101084	1.59107	1.9311	3.86036	2.79339	4.05718	3.1585	1.98736	1.84611	5.73741	2.47628	3.33308	5.51109	6.35481	6.96042	8.62395	9.46163	5.78102
	Csa2G360040	0.000838321	0.00666914	0.951113	0.831831	2.41872	0.831887	1.59954	3.6281	4.20249	5.58276	7.95	7.16581	8.90745	5.05526	3.44817	4.64591	5.75574	7.28885	5.28123
	Csa2G372780	0.00328262	0.0202708	3.65442	2.92215	4.64666	4.27263	5.95074	2.43398	3.41736	5.808	4.81905	4.86404	4.82491	3.48725	2.82241	3.41003	5.9962	6.93269	5.28395
	Csa3G880040	0.000208985	0.00209965	2.41707	2.55552	3.32481	4.10736	4.43629	3.09614	2.5403	4.30025	7.16782	4.88395	4.05076	4.13187	1.74232	2.33388	10.6569	5.92932	7.89418
	Csa3G247880	4.71e-13	3.09e-11	5.58498	7.66004	3.92417	4.75911	3.6102	5.42014	4.87806	7.04535	3.3301	3.49218	3.19704	5.11461	4.52912	5.14194	2.35199	2.80943	2.79351
	Csa3G180410	8.35e-06	0.000127824	2.10675	2.1861	3.16963	3.8807	4.0782	2.76716	3.05262	2.8264	7.03665	5.3426	4.68921	4.50174	5.12539	5.78488	6.56568	6.64561	5.9393
	Csa1G039030	0.00588965	0.0324344	0.831379	2.12883	1.49758	1.76597	2.42092	3.41117	2.24866	3.37625	5.39318	5.62221	5.44259	6.51385	4.49469	6.7566	7.9275	6.82115	9.18894
	Csa3G860270	0.00154814	0.0110279	6.79966	4.23127	4.37406	6.18542	3.39016	5.9686	3.90211	5.23615	4.37046	3.69671	3.54513	5.43581	5.50591	4.68132	4.41727	2.75949	1.34806
	Csa2G425780	7.19e-09	2.3e-07	3.45504	2.91326	5.9753	4.25064	4.86695	4.16789	2.78356	1.94094	5.83384	4.23401	4.71607	2.82522	3.16106	3.26065	6.79444	8.4113	6.25793
	Csa5G181440	0.000121181	0.0013182	0.84133	0.316316	0.513086	0.123248	0.952311	3.86717	9.44308	2.42364	0.573554	1.33314	1.15473	13.036	16.0609	17.396	1.40094	2.25044	4.22915
	CsaUNG003210	0.00838908	0.0422232	3.91601	3.72628	3.59112	3.10544	3.37257	4.57728	3.9704	6.60353	4.45161	3.31823	4.21114	7.39553	4.40359	5.74746	4.71382	4.3618	4.61677
	Csa6G411280	2.57e-05	0.000343603	0.218395	0.432946	2.86109	0.541219	2.92924	2.97237	1.5527	1.85828	3.95786	2.98939	12.429	3.28892	1.102	7.45104	11.0047	11.2941	9.22046
	Csa1G045830	0.00259065	0.0168432	3.75426	3.94449	3.46738	3.85438	4.31986	4.59862	4.66517	5.08205	3.30905	3.15671	3.38182	5.71484	5.38539	7.58844	5.38616	5.6502	2.9906
	Csa7G063990	0.00816906	0.0414407	2.87271	3.97315	8.402	2.90911	6.50819	4.73345	3.84108	2.48051	5.61331	4.83355	6.29786	2.5288	3.82851	3.2899	3.0858	5.91314	5.18874
	Csa2G351020	6.45e-05	0.000767114	4.10271	4.20576	4.03107	4.17512	3.84875	5.52636	4.20965	4.94135	3.43101	4.05703	2.99015	5.65719	6.52764	5.03096	4.81454	4.76275	4.04482
	Csa1G028020	0.00398477	0.0236347	3.79951	3.87684	4.02596	3.95622	3.94436	4.24965	3.38526	2.33394	6.35174	5.82718	3.94072	4.18451	4.67214	3.77664	6.29572	6.07541	5.78623
	Csa3G165080	6.77e-06	0.00010565	5.502	5.58768	3.72211	3.9755	5.3007	5.6866	4.72583	6.01764	4.45797	3.79202	4.34586	6.55295	3.75476	6.18356	2.27245	2.42192	2.31715
	Csa4G362910	5.59e-07	1.15e-05	1.60032	3.53851	5.5033	4.64134	6.2568	2.43921	3.1393	1.57117	5.01952	5.17537	4.25503	0.751556	3.32761	3.09047	9.17514	7.16181	10.2228
	Csa4G037610	1.6e-06	3e-05	2.5879	3.36673	6.62164	4.80993	5.88021	2.8488	3.84978	3.69085	7.79433	3.74262	6.21192	3.09409	2.7399	3.12354	6.16915	4.98648	5.41141
	Csa6G362420	0.006644	0.0354787	3.16454	3.80516	3.602	4.38945	3.99176	4.77627	2.22901	2.02651	6.92294	5.61317	4.70933	5.34206	4.54355	4.64187	6.02683	5.95031	5.33094
	Csa4G639730	4.9e-05	0.000601572	8.19502	1.87451	6.34863	6.86252	6.34131	1.7033	2.04604	3.10859	8.95758	8.78279	9.57418	0.769725	0.170403	1.36955	4.96318	3.29132	2.82464
	Csa4G665110	1.47e-06	2.77e-05	1.32892	0.98792	4.20277	1.72015	4.52935	3.24164	0.731714	4.52945	8.4155	4.18213	5.56784	3.80312	2.42479	1.48368	7.58562	12.4314	10.0236
	Csa6G005140	0.000421238	0.00375354	3.2531	3.63543	4.54375	4.36959	4.74485	5.18966	2.27733	3.07145	6.16734	4.97358	4.97749	4.30317	4.46578	3.95722	5.45729	6.93032	4.89695
	Csa5G589940	0.000847054	0.00672739	2.50093	3.44725	6.18155	2.73917	5.42054	2.95641	2.97149	4.80613	4.82846	5.53989	4.99354	2.6243	2.28164	3.39589	4.1432	6.48998	11.9066
	Csa6G476070	3.69e-127	3.52e-123	7.03535	11.4947	0.227884	0.246331	0.368388	11.9767	10.6107	9.32922	0.286584	0.226765	0.445383	9.81763	6.39493	7.91297	0.486954	0.307545	0.184756
	Csa1G073900	1.12e-06	2.17e-05	2.71819	3.07315	1.29363	2.30051	2.20366	3.11123	2.79638	4.04093	2.15164	2.61608	2.22432	9.59402	15.1546	15.6658	3.16556	3.63248	2.02995
	Csa6G476680	5.13e-07	1.06e-05	2.42914	3.05601	4.40626	3.77065	5.2433	4.43179	4.15872	3.30634	7.79238	8.81491	5.28446	2.96608	1.61633	3.06724	4.31544	6.08591	7.03307
	Csa3G855960	2.35e-08	6.7e-07	7.53837	5.87738	4.33565	4.39369	2.87167	6.23755	5.49872	3.84002	3.86215	2.92118	3.89983	6.67897	4.62218	5.76987	3.76375	2.46849	3.24049
	Csa4G017010	0.00270457	0.0174411	1.73951	4.59786	4.44375	5.09083	6.63099	4.41002	3.40546	5.38224	9.45727	5.51795	4.00845	3.02081	2.17344	3.2473	4.70722	5.80492	4.34177
	Csa1G539330	0.00149754	0.0107491	2.28243	7.46574	3.41993	1.63627	2.29599	8.15431	7.67263	5.23037	3.24326	2.62209	2.51023	5.15583	4.44223	6.11576	6.76875	3.17783	5.79538
	Csa3G121780	0.0036514	0.0220483	1.27423	2.67461	2.46713	2.46781	3.37315	3.96052	2.71082	4.43543	5.92739	3.73748	5.88824	6.26927	3.68756	4.45104	8.57662	10.1377	6.13498
	Csa3G119560	0.000361513	0.00328927	3.81663	4.12695	5.40208	5.24408	4.0979	4.55129	2.62355	3.46841	5.6723	4.54051	4.08154	3.84552	4.3865	3.73681	6.5562	5.83945	6.28254
	Csa3G124990	1.7e-12	1.05e-10	4.97283	5.1051	2.72656	2.21634	2.30372	6.13177	4.32328	3.68349	3.34658	3.38603	2.48809	8.91827	6.52912	7.0739	5.2203	4.90132	5.01351
	Csa2G365680	6.29e-14	4.72e-12	6.48862	7.66403	3.75411	3.50571	2.84883	4.56123	6.60419	7.29261	2.01136	2.80728	2.91275	4.27889	6.35586	10.4349	2.04109	2.13599	2.8095
	Csa1G701980	0.000581226	0.0049194	6.37659	5.35085	6.01605	6.15671	4.66123	5.98247	5.2077	4.66623	4.09622	3.38291	3.47235	4.29118	4.01541	4.44292	3.59418	4.23368	2.70571
	Csa4G646050	0.000322324	0.00300557	4.57701	3.93183	2.54835	2.59259	0.969305	6.96219	5.37628	9.73623	3.77031	4.0275	3.83529	7.26531	4.12411	5.74532	4.48446	3.64147	5.46898
	Csa5G606800	0.00207665	0.0140325	3.39319	2.67341	4.57347	6.37596	6.35684	4.07483	3.46936	3.33138	5.48276	6.37992	3.46301	4.9931	3.85707	4.36853	5.0234	5.32136	5.92574
	Csa5G608050	1.13e-05	0.000165494	3.24588	2.55493	4.5493	4.88375	5.88	4.0508	1.85914	2.60309	6.38958	5.10255	5.09977	5.69245	3.40642	4.9317	6.86494	7.10483	4.9241
	Csa5G168800	8.4e-08	2.13e-06	1.61378	2.173	2.90194	2.78111	4.12692	5.52136	2.3436	3.25029	8.54042	6.31123	5.61315	4.31275	4.1812	3.49867	8.34257	7.29775	6.40331
	Csa2G264020	0.00598761	0.0327908	3.08173	3.10234	5.72466	4.29583	3.23771	4.30798	3.63924	3.96681	4.22435	4.1194	5.67406	3.70411	4.47758	5.20741	7.10204	7.56618	5.89744
	Csa6G104630	0.0013592	0.00994958	2.65895	3.48428	3.77855	3.2069	4.88341	4.87082	3.5802	2.38795	5.55001	5.18468	3.99666	4.9709	4.87291	4.67069	7.71147	7.05153	6.5158
	Csa4G012500	0.00321117	0.0199199	4.01342	6.47104	6.94027	5.62654	3.3998	5.59081	4.71428	7.32661	4.29787	2.77294	5.15665	5.1619	5.55463	5.11538	3.70757	1.91585	1.66246
	Csa3G820500	0.000151541	0.00158602	4.88447	3.88824	5.7441	6.45097	6.27083	4.07256	3.09794	3.43569	5.7852	5.27049	4.6125	3.67736	3.55741	3.90994	6.16369	3.77534	4.83844
	Csa5G286060	0.00946842	0.0462151	4.10239	4.32043	4.5346	5.66414	4.61546	3.69489	2.23503	2.85599	6.58972	6.06658	4.94154	6.07363	4.93478	2.62429	6.19067	5.15079	4.90187
	Csa6G014490	0.00311043	0.0194596	2.30408	4.20476	4.14686	3.63634	6.11079	3.72373	3.91389	2.99822	4.23056	3.8528	5.00719	3.12889	5.09904	4.36639	6.93976	7.4096	8.54234
	Csa6G135980	0.00446661	0.0259439	5.28208	5.03085	4.60997	4.48168	3.24963	5.38639	4.48781	4.10867	4.37542	4.21227	4.11084	5.40471	5.90274	4.5874	5.01833	4.75414	4.68952
	Csa7G388340	1.35e-24	3.3e-22	10.1566	8.85741	4.06879	4.21295	3.92338	6.28168	7.11448	6.42338	1.45426	2.30143	2.92213	4.36451	7.25844	5.42964	1.69311	1.51728	1.71882
	Csa3G130280	0.00217083	0.0145861	4.76336	4.38636	4.5292	7.08262	5.43434	4.5393	2.56485	5.38426	6.07558	6.30974	5.79403	3.1145	1.92726	3.32345	5.09719	4.43153	4.95724
	Csa7G368730	0.00689987	0.0364672	3.97538	3.74973	4.12646	2.72396	2.78368	5.35148	3.53787	7.0305	4.23864	4.10619	4.46617	7.00711	5.51169	6.25313	4.34149	4.87813	5.7461
	Csa5G168830	3.39e-05	0.000437016	2.62341	3.34326	7.73279	1.59214	4.76209	1.08014	1.7377	3.21786	7.03878	4.61689	4.71059	3.02023	2.10718	3.83586	7.47504	12.8213	8.15011
	Csa3G731720	0.00186948	0.0128493	1.05563	5.71242	3.92451	3.03013	2.68873	3.87158	2.46053	2.15174	8.10816	6.69469	4.21361	2.43857	3.60931	3.22317	8.32617	7.57572	10.8408
	Csa4G554160	0.00061118	0.00513418	3.59131	3.06134	3.59917	5.26362	6.0084	5.0028	3.26375	3.00022	6.56751	4.42419	4.51399	4.73593	3.72781	2.91287	6.40905	7.00025	6.8659
	Csa6G501260	7.67e-10	3.13e-08	2.34143	4.18232	4.84074	4.19642	4.28714	3.07541	3.05339	3.16954	6.66023	5.91389	6.15679	4.25869	3.29649	2.94381	7.93715	7.15546	6.52805
	Csa5G138480	0.000723828	0.00592898	4.93223	3.81007	3.13973	3.98411	3.2611	5.78401	4.27322	3.43907	3.7768	4.43742	2.54671	6.39	5.73363	9.54731	5.76108	5.2275	4.03963
	Csa1G305710	0.000574472	0.00487305	5.38803	4.96863	3.23958	5.18154	5.64854	8.27313	4.05191	6.09618	3.77594	4.03614	5.22245	5.59705	4.60852	4.60727	3.65822	3.09241	2.6585
	Csa6G128660	0.0103018	0.0492046	1.74987	2.94105	3.84976	2.18169	3.58497	5.7103	3.52765	2.82484	5.35843	5.02102	6.41504	3.66947	5.38826	6.06066	6.90852	7.86891	7.04536
	Csa3G839800	0.00231722	0.0154069	2.92458	3.19946	3.25665	4.44059	3.87673	4.50068	2.71208	4.67531	5.51421	5.48581	6.172	5.66074	4.47398	4.45553	6.36767	6.44178	5.95364
	Csa3G859640	0.000126959	0.00137166	2.70842	3.67479	3.38093	4.52699	4.63096	4.1856	2.28516	2.88497	6.00739	4.53642	5.32498	6.07201	4.53678	4.71593	7.22453	6.86627	6.55205
	Csa5G155560	0.000157436	0.00163873	3.34441	2.0227	4.01005	4.87647	3.48132	3.33554	2.786	3.09124	5.25309	6.81685	3.14681	5.53715	3.06456	2.84617	11.5441	5.41182	9.55018
	Csa3G823020	2.01e-05	0.00027841	2.34536	1.18141	3.21105	3.3893	3.62342	3.18589	3.17327	1.82907	5.79596	8.98438	4.55077	6.3848	3.78313	6.0514	7.58804	8.02977	7.35062
	Csa4G280600	6.17e-12	3.51e-10	1.79866	3.56565	8.48279	4.4701	5.98035	2.72158	2.33515	2.7548	10.3122	10.5866	4.55922	1.40559	1.20579	2.36198	4.45607	5.65249	7.82302
	Csa6G366290	0.00445639	0.0259082	6.11881	4.15973	6.10639	5.40983	5.35969	3.88559	2.43605	3.53122	5.38342	5.73186	5.93927	3.01199	4.08739	4.17596	4.90997	4.68334	5.55042
	Csa6G052790	0.000675871	0.00559626	4.71019	4.12304	6.2307	5.99874	4.18868	4.48106	2.3447	2.34223	5.59328	4.88432	4.52782	4.45665	4.51972	4.19368	7.21355	5.21152	5.5794
	Csa4G120790	0.00468801	0.026967	5.99404	5.85326	5.06049	4.76278	5.64177	4.15894	6.21729	5.97601	4.66327	3.99378	3.72051	3.57815	6.00103	3.94423	3.68218	3.79742	3.55455
	Csa5G158500	3.38e-05	0.000435379	5.64247	5.24326	4.8262	3.74544	2.98737	5.32398	5.18577	5.84547	3.82836	3.02927	3.5619	5.41331	6.75466	4.76724	6.05549	4.45909	3.97302
	Csa6G507120	0.000461915	0.0040535	3.8637	4.58765	5.08141	6.28351	5.49756	3.91488	2.35131	3.40896	6.29084	5.13515	4.7847	5.11086	4.13414	4.29421	6.12621	4.94314	4.92924
	Csa1G070580	0.00718721	0.0375796	2.92908	3.45064	3.65639	3.18738	3.86424	5.07442	5.54382	4.29002	4.06423	4.7417	3.2692	5.89246	7.63219	8.57753	5.26756	5.3484	3.95891
	Csa3G000060	0.00945031	0.0461598	6.00211	4.41454	5.6409	6.09751	7.47929	4.03223	3.7752	5.51081	4.34233	4.45654	6.61483	2.29424	2.69	2.25102	4.83975	6.50546	3.82497
	Csa5G218770	0.000228398	0.00226133	6.08773	9.8345	5.92391	4.041	6.8491	9.87645	13.2721	5.39954	4.44819	2.94741	4.10794	1.64391	1.96207	1.01738	1.75129	1.01874	0.699434
	Csa3G119610	0.00142749	0.010358	2.13434	3.82285	5.37145	3.85757	3.56846	5.57588	4.75717	3.51918	8.69828	6.80947	4.35351	4.43496	2.91509	2.60322	5.42451	5.17617	7.87457
	Csa7G075030	8.05e-05	0.000929063	2.60511	4.38189	5.15803	4.31791	5.55883	3.74466	1.1347	4.12186	8.38876	4.90115	7.81397	3.6629	2.98752	3.77318	7.08551	6.51622	5.23517
	Csa3G036460	1.08e-09	4.2e-08	5.71707	4.68374	3.75438	3.93436	3.6137	5.77968	4.43608	8.73182	2.88333	3.90705	3.11634	8.26294	6.78088	9.18172	2.38838	2.34967	1.88207
	Csa2G001000	3.64e-07	7.81e-06	2.2885	2.04153	7.71999	4.53703	7.51211	2.83984	3.53703	5.13365	6.88081	5.51916	5.51323	2.32862	1.4022	2.43071	5.1251	9.71058	7.01852
	Csa7G448810	0.000281206	0.00268653	3.69675	4.05402	6.87799	4.63626	6.57958	3.58928	2.44346	5.06504	4.85935	4.46027	6.50843	3.45743	2.76399	3.98722	5.44952	7.11817	6.10886
	Csa6G514800	3.96e-06	6.59e-05	2.83346	3.39979	7.32627	12.4333	9.00093	1.4327	2.76587	5.36405	5.52804	5.1032	8.43498	1.63883	2.0156	2.01596	3.67895	3.48527	5.25667
	Csa5G631490	0.00925811	0.0454656	6.88382	3.41162	9.01815	5.48332	8.30156	3.44445	1.24126	1.33121	5.198	3.73911	6.00862	3.26877	4.54862	3.13881	9.63519	3.42298	3.65571
	Csa6G366560	0.00225447	0.0150474	3.0277	1.79054	6.84961	1.89155	8.02844	6.04969	4.0346	3.98536	9.49421	5.62193	6.66243	3.728	3.60386	1.00725	4.16661	7.46436	4.52978
	Csa6G483500	1.17e-08	3.57e-07	3.55539	3.29272	4.99296	4.27193	4.9246	4.35588	2.68094	1.66679	6.21251	6.32028	5.28513	4.25357	4.05788	3.08626	8.52027	7.92885	6.56551
	Csa3G046230	0.0022264	0.0149071	6.72801	3.1589	1.73961	4.98313	6.37428	6.27231	5.08983	4.82768	4.15665	4.76044	3.05995	8.53944	6.31753	7.9496	2.3233	2.20099	3.59647
	Csa3G904140	3.49e-07	7.55e-06	1.82727	1.85823	4.29021	3.65454	4.24666	3.64774	1.82654	2.28537	7.12532	7.07656	5.66726	6.60656	5.97858	3.57458	5.3062	9.6997	7.48584
	Csa5G494420	1.07e-05	0.000157331	3.34357	7.60303	2.31895	1.09666	2.65534	6.49526	3.92137	4.56414	3.82761	1.77875	1.13305	9.66621	7.92169	7.78636	8.1555	5.37896	4.52394
	Csa6G519690	0.0064854	0.0348563	6.60734	5.58341	6.13296	6.27368	5.93245	4.42441	5.53429	5.40538	3.49894	3.81056	4.52879	4.23839	3.8849	5.70372	3.42013	3.66402	3.5291
	Csa3G146660	0.00680799	0.0360821	4.62318	3.92785	8.11151	6.01241	5.79457	5.212	3.14982	1.36843	6.06226	4.28952	4.10128	5.12665	4.13171	2.55089	6.6856	6.89662	4.1713
	Csa2G008700	1.2e-05	0.000175252	6.2902	6.45076	5.59175	5.03216	4.46923	4.83968	4.99984	5.78191	4.7105	3.54091	4.44942	5.22013	4.97587	4.575	3.85903	3.54755	3.93697
	Csa1G026000	6.5e-06	0.000102049	3.51707	2.81754	2.8876	2.55847	2.14267	4.86004	2.94877	5.42247	4.10765	2.44947	1.66532	8.94192	10.3146	14.9797	4.60248	3.59355	4.54789
	Csa6G067360	1.48e-18	1.99e-16	1.92127	2.09167	5.60127	5.18494	7.93751	3.40411	1.84008	2.70432	6.49922	6.49759	8.08261	3.53814	2.75851	2.91957	5.48857	8.61383	7.30105
	Csa4G286970	2.2e-11	1.18e-09	0.586689	15.5073	0.832642	0.276935	0.828315	16.6743	16.1404	2.19347	0.483285	0.254939	0.955917	5.41257	9.304	11.7076	0.136864	0.518633	0.623132
	Csa6G382990	6.89e-10	2.83e-08	7.42912	7.40092	4.00606	4.15765	3.12544	8.00535	5.33516	2.62662	3.80165	3.19156	3.03925	7.78843	8.04634	5.5431	4.05697	2.33837	2.98886
	Csa6G524620	0.000167791	0.00172765	3.09385	2.53955	3.84728	4.85182	3.63435	4.9635	4.05701	3.00083	7.28728	5.908	4.12671	5.37143	3.94636	4.10763	8.83	5.48061	7.88455
	Csa5G585410	0.00540113	0.0302302	7.26754	6.57927	6.52178	5.37732	4.89947	4.77103	4.76256	6.15571	4.37024	4.95021	4.41512	4.52571	5.94597	3.11105	4.62839	2.16827	2.54726
	Csa5G150470	0.001016	0.0078533	3.77402	5.56965	8.07546	6.59139	10.035	3.3236	3.42202	4.96284	4.97416	6.64184	6.06133	2.25291	1.72296	3.15825	4.49008	5.58819	2.40507
	Csa4G049060	0.00520326	0.0293293	5.54379	4.06787	6.0819	7.86256	7.31078	5.70445	3.09089	1.34173	7.87264	6.27372	2.95681	3.22539	3.98393	2.43019	6.55755	5.11868	3.7117
	Csa1G264520	8.82e-06	0.000133977	3.17094	2.92873	4.67335	4.5924	5.26542	2.33669	4.4108	3.5956	4.63047	8.66665	7.69949	3.60785	2.88315	2.64428	6.43052	5.01693	10.5917
	Csa4G639950	0.000638045	0.00533869	3.04594	4.38354	4.97832	4.38591	3.4734	4.1854	2.66166	2.92249	5.89877	5.21159	5.33782	4.82781	5.00351	5.51457	8.332	7.22344	5.77426
	Csa7G073780	6.91e-05	0.000812937	2.08698	4.74189	5.61531	2.93262	6.7656	4.00996	2.76902	2.98032	5.59384	5.11686	4.8764	2.11703	2.7426	4.27832	7.48255	10.8884	8.24836
	Csa2G171920	0.00356752	0.0216515	4.47806	4.78009	6.2275	5.5243	6.09133	3.51616	4.50406	2.6379	5.06501	4.9508	4.94304	4.79491	3.94806	4.55677	6.6536	6.06352	4.6922
	Csa5G165850	0.00267741	0.0173128	1.43004	2.34893	2.36855	1.95275	2.55259	4.12157	3.29639	2.4652	5.14953	5.79242	3.72329	8.58101	3.35757	4.6948	9.95087	11.7838	9.86182
	Csa3G002760	0.00305673	0.0191992	9.08073	6.14538	4.61491	3.65821	5.37139	6.69337	3.54259	7.48441	3.25004	3.91871	5.24771	3.89989	5.89118	4.05151	5.45661	1.993	3.14287
	Csa3G134630	0.0101152	0.0484885	9.69744	6.49832	5.63634	4.35184	4.48342	4.59261	5.19303	6.49756	3.20656	2.80433	4.578	4.33612	4.87352	3.56083	4.58819	4.34664	4.24323
	Csa7G039230	0.00186355	0.0128197	5.1167	4.20732	6.41333	5.18913	6.20557	4.80478	3.66274	2.97587	4.91207	4.15007	4.352	3.74234	4.28456	3.8757	6.1252	8.08557	5.47028
	Csa3G731740	0.00148163	0.0106495	2.53776	3.3344	4.29104	2.44455	3.43711	4.74853	2.29863	1.98586	4.44834	7.15508	5.43991	6.62977	4.65838	4.16001	7.2487	8.98003	9.94319
	CsaUNG024830	0.000435733	0.00385926	3.29264	4.42408	2.22866	1.78736	2.55679	4.39344	4.27475	7.81066	5.2438	3.00464	3.98531	11.3466	5.5381	9.6086	2.68839	6.98567	4.72118
	Csa3G011860	0.00808338	0.0410936	3.84986	4.35155	3.38446	4.19642	3.68321	5.27212	3.88329	5.6033	6.21745	4.29234	3.78487	9.77276	5.84239	6.71733	4.96318	4.9034	3.18781
	Csa3G627650	0.0081991	0.0415048	6.86067	5.69422	6.61905	7.19873	5.12028	4.86393	2.83615	2.3018	6.58771	6.10164	4.6753	4.2895	3.03877	2.35451	5.98729	5.34326	4.04946
	Csa5G190560	0.0041774	0.0244653	7.14207	4.81387	6.063	5.76489	4.65858	4.25411	5.56342	6.69582	2.40038	4.58078	5.14683	4.95338	5.80728	6.17905	4.1986	2.67065	3.41357
	Csa6G133660	2.44e-05	0.000330014	4.35073	4.9593	3.4198	3.49125	4.65811	7.02436	5.02083	4.40308	4.33056	4.53734	3.8229	7.93909	5.30537	8.44865	3.75529	4.15853	4.79427
	Csa4G627800	0.000138675	0.0014732	7.34738	6.53192	4.31657	6.11403	5.29363	3.27466	5.61939	9.75555	3.74375	3.48073	4.52233	5.54934	4.91409	6.80195	1.5108	2.33522	3.34879
	Csa3G081360	1.46e-05	0.000208177	0.582387	1.15452	1.64513	0.798942	2.0813	5.74076	5.06316	4.98358	10.6143	8.46993	9.42978	3.58521	4.93275	4.00669	5.70612	10.0875	6.002
	Csa1G601010	0.000813638	0.00651902	5.58174	4.88388	5.36294	4.61665	4.47205	5.2349	5.47391	4.35585	4.83701	4.53973	4.30727	5.60923	5.88844	5.36578	4.71873	4.8633	4.82507
	Csa4G296140	0.00905982	0.0447337	3.12209	3.54748	4.93803	4.97381	7.57945	4.16078	2.50685	6.05228	6.44522	6.55171	5.54335	5.1604	3.49929	4.19107	3.91696	5.56613	7.23357
	Csa5G598030	0.000283131	0.00269619	6.0828	6.19863	4.49923	4.57306	3.72709	4.14484	4.78519	8.08875	4.77143	3.47479	4.97537	4.79856	5.6903	6.86335	4.34071	4.07821	4.04244
	Csa7G021920	0.00120104	0.00896386	3.4721	3.04252	5.33969	5.82536	5.80789	2.35673	2.98649	4.14543	3.29538	7.37982	5.32343	5.03832	5.00566	3.83848	4.54291	6.50566	11.364
	Csa6G000690	0.000346218	0.00319093	3.24849	3.49027	4.77546	6.00479	6.09182	5.98561	2.96646	2.70461	9.16152	6.06123	6.15581	3.63346	4.66541	3.92684	4.34729	8.08888	4.05934
	Csa4G011780	7.28e-08	1.87e-06	2.68137	3.86585	5.68824	5.04838	6.74326	4.79345	2.54305	2.26268	7.07814	6.40507	5.90437	4.65065	2.66864	4.76627	6.74915	6.78777	6.80834
	Csa6G497390	3.57e-15	3.25e-13	7.10562	7.81644	3.0664	3.07786	4.75047	6.5922	9.40593	5.72273	3.02992	3.24205	4.20292	4.76342	7.442	7.9104	2.60342	2.18924	2.56376
	Csa6G106760	9.95e-08	2.46e-06	6.34384	6.1092	5.11052	5.04522	5.15743	5.12697	5.99441	4.25596	4.34652	3.55686	3.0547	6.16748	8.1922	7.2577	3.21931	3.85713	2.80214
	Csa6G362930	6.7e-08	1.73e-06	1.80375	1.49478	2.44048	2.63802	2.5988	4.19016	3.29053	3.22509	7.38047	5.55084	4.33612	5.95744	4.38023	5.76749	11.9819	10.8512	8.09108
	Csa4G291940	5.95e-05	0.000712717	3.75119	5.84285	3.53525	3.49619	3.16145	3.76929	5.39542	8.34966	4.44588	3.81728	4.97155	6.54335	7.78093	10.2749	4.01823	3.65442	3.20159
	Csa1G073700	0.00669185	0.0356897	3.64609	4.45727	5.19451	3.5497	5.08337	5.61913	2.87399	2.67934	5.70658	5.88196	4.26459	4.82301	4.66514	4.45943	9.56885	6.28513	7.47891
	Csa1G207300	0.000168851	0.00173481	3.04893	3.0221	4.38259	5.15711	6.6363	2.23754	3.56042	6.35468	7.32538	8.1701	4.1398	3.4471	3.90719	3.10755	8.23875	5.95203	7.55609
	Csa3G820510	4.11e-07	8.75e-06	3.86987	6.8819	1.78932	2.53857	1.0847	6.97092	3.37758	6.33908	3.51596	4.22875	2.62281	8.61665	9.59937	11.21	2.74813	5.77288	5.16804
	CsaUNG024800	0.000106862	0.00118681	6.19956	5.9337	4.83464	4.77319	4.2322	4.30912	5.6173	6.03908	4.32402	3.9425	5.32143	5.63946	5.58932	6.20916	4.2144	4.91117	4.45738
	Csa4G624960	0.000703337	0.00579341	3.38192	5.37802	4.82537	4.71623	5.32488	5.15609	3.61343	1.62079	6.99491	6.21055	5.08248	4.48853	4.43578	2.83958	8.15007	8.65688	5.99121
	Csa5G177050	3.13e-05	0.00040726	6.03694	4.93032	4.63662	4.74101	4.05154	6.02439	5.44059	7.69522	4.57019	4.57228	5.03192	5.34681	6.06783	6.40387	2.94554	4.73534	3.86071
	Csa4G312250	3.6e-81	9.81e-78	7.59245	7.33099	2.07933	2.61839	1.75576	7.86006	6.98007	7.69562	2.15665	2.00512	2.0567	11.0555	10.2382	9.18498	2.58805	1.73579	2.21588
	Csa3G223310	0.00853184	0.0427916	5.03565	5.53862	5.70723	7.99886	6.26764	5.35765	2.7445	2.81891	6.24946	5.63601	4.69616	5.77116	3.34333	3.00697	7.55841	4.12936	5.35724
	Csa7G431330	3.8e-07	8.12e-06	2.33134	4.86673	6.07365	5.40229	6.02195	3.81774	2.55502	3.31982	7.94364	4.9732	4.21788	3.36423	2.32982	3.92238	10.1973	8.74714	7.13302
	Csa2G121970	4.68e-09	1.59e-07	3.052	4.14458	4.49146	6.25441	6.19295	4.82762	2.96739	2.01241	8.92113	6.36232	5.54859	3.94003	2.86389	2.09014	7.59336	7.11338	9.14106
	Csa2G382470	6.73e-05	0.000794867	3.69656	1.52668	1.31156	1.41772	1.30474	7.64521	3.99929	3.57424	5.4557	2.71063	2.47372	10.908	11.6578	11.0054	6.14416	6.12705	6.87081
	Csa5G409650	0.00540309	0.0302322	6.05521	7.58137	3.57863	5.0288	7.23132	3.38978	6.79738	10.7764	4.05039	4.09521	5.7225	2.77956	6.20267	5.75888	2.00733	2.98831	3.80803
	Csa3G681660	0.000617135	0.00517964	5.29771	6.6832	4.4954	5.71179	5.43968	5.7836	4.16842	8.66154	3.66972	2.98222	4.62417	6.46871	5.12067	6.8205	4.63446	3.67204	3.74054
	Csa6G501300	0.000284339	0.00270186	0	0.952965	1.65312	0.255276	2.96929	4.71448	2.8233	2.13811	4.85085	5.40499	7.30098	6.84798	3.98495	5.02849	12.3636	12.6688	14.0727
	Csa6G538760	0.000282487	0.00269337	3.93385	2.29849	3.98721	7.6084	8.46253	4.37601	3.64801	3.84372	4.60493	8.62352	6.33248	4.34832	3.98487	4.19829	7.38984	5.0241	5.39318
	Csa5G157290	1.82e-14	1.49e-12	2.98299	2.41656	8.45451	5.87934	7.38029	4.20223	2.73964	2.39617	11.1993	6.2817	7.45069	2.59167	3.07032	1.68942	4.27562	8.98532	6.16901
	Csa6G421040	2.72e-08	7.6e-07	3.1156	4.17258	7.99183	6.39064	10.7786	5.28378	3.77142	2.98032	9.40388	5.69702	8.96809	3.16538	1.6201	0.895622	4.41913	5.60562	4.09221
	Csa5G425400	3.14e-09	1.11e-07	2.51577	4.01516	5.73968	4.66454	5.68902	4.45492	3.47968	4.05695	9.79981	12.1734	6.69941	2.86358	1.15263	1.52338	5.01335	6.61527	8.05008
	Csa3G736760	3.91e-06	6.54e-05	3.46212	3.61714	5.90235	5.36645	7.35179	4.71946	2.27342	4.49478	8.34764	5.81847	7.95835	4.47874	2.87335	4.15611	4.93102	7.83533	5.14308
	Csa2G257100	0.000896469	0.00706395	4.11794	4.50687	5.85831	4.46465	5.99558	4.17249	4.81318	4.77801	5.61824	6.08117	6.96413	4.60914	4.1279	3.43776	7.47496	6.27091	5.48425
	Csa4G622760	1.47e-06	2.77e-05	7.8973	5.81649	3.8797	5.59166	4.03599	6.25666	4.80603	9.35409	3.89646	4.77219	4.88272	7.96879	6.52288	4.23639	2.13015	3.35426	3.40757
	Csa7G429520	0.0051377	0.0290353	3.00341	3.83286	4.97975	3.34932	3.49829	3.02066	3.69036	3.31059	4.73164	4.992	4.48287	7.10535	5.68307	6.34384	8.39453	8.58731	9.86898
	Csa1G575000	2.26e-12	1.38e-10	8.66668	7.9768	5.03486	5.66157	4.66134	5.65816	6.34663	7.66163	2.63469	3.73238	4.64696	5.50114	6.84227	5.11402	2.96045	3.14662	2.6711
	Csa6G127410	4.58e-05	0.000567137	3.39662	4.03695	4.29524	5.7452	4.64565	5.26866	2.42069	2.57265	8.10244	6.84171	4.18364	5.20345	5.11788	3.53784	9.07921	8.19463	6.27573
	Csa1G064740	1.41e-05	0.000202522	2.30664	3.2804	3.81833	2.92912	5.89378	5.05829	3.74331	3.46184	8.76728	5.41746	6.1977	4.83702	4.2562	4.33346	9.23829	9.57476	5.81191
	Csa1G003480	0.00279345	0.0179053	4.39491	5.50261	4.20453	7.24722	7.34796	5.83335	5.89885	3.08647	7.85987	5.99313	6.29936	2.54196	2.50108	2.2335	6.19197	6.44109	5.38959
	Csa2G271390	3.17e-06	5.41e-05	7.15389	6.82522	5.15238	6.12105	4.66572	6.86074	5.53099	4.35442	4.2231	3.94768	3.40442	5.70752	7.20988	5.48407	5.99737	3.18238	3.16298
	Csa4G188370	0.00346804	0.0211826	4.51546	4.82538	6.40535	5.90475	5.3342	5.38867	4.40981	1.88286	6.15479	5.84964	4.95135	4.97942	5.01971	3.14741	6.04372	7.63406	6.59255
	Csa5G418770	0.00398318	0.0236326	2.44918	3.88419	4.7326	3.77173	7.17506	6.12747	3.48253	3.1733	7.01084	4.50981	5.00243	5.48265	3.66334	5.43923	8.52735	8.64675	6.09682
	Csa3G784360	1.87e-06	3.41e-05	2.17052	4.9512	3.27196	0.978939	3.99847	7.81965	8.05123	6.10635	3.15955	2.87798	2.77177	7.80564	11.6059	11.1107	4.08888	4.11018	4.44095
	Csa7G446900	0.00770749	0.0396156	5.58698	4.51716	6.04037	6.42103	5.51654	5.80333	4.17886	3.06383	5.92081	6.09045	5.0938	4.44421	5.05988	3.9082	6.11118	6.80337	4.78756
	Csa4G642550	0.000273379	0.00262399	2.09717	3.71649	4.24599	2.49733	3.8357	3.58691	3.35919	5.23536	6.28199	6.08917	6.25713	4.03509	3.2296	3.31363	8.00561	13.6515	9.94757
	Csa6G120430	0.00353787	0.0215058	3.17812	3.918	3.51296	5.14747	5.3003	5.43861	3.37086	3.01919	5.89045	6.71952	4.68123	7.08211	5.47673	4.50721	8.19475	7.30899	6.64559
	Csa3G535110	0.00107123	0.00818728	4.39491	5.04406	2.53787	3.88975	4.00055	5.69446	4.68333	6.35186	4.52538	5.42774	3.43234	6.44904	9.42072	6.36547	5.42303	5.13753	6.67941
	Csa3G133890	0.00402314	0.0237883	1.21674	4.9206	4.35159	3.72171	6.18425	2.68854	3.43012	6.32474	7.99825	5.18674	5.25075	3.9222	3.05222	4.93441	8.32793	9.53516	8.54868
	Csa7G351890	0.000246317	0.00240626	2.06764	1.2072	4.42484	1.68458	3.89892	3.70749	3.23069	3.28639	4.79467	5.98159	8.06951	5.98311	7.38073	5.00486	5.58987	12.1686	11.1684
	Csa6G513620	0.00834823	0.0421255	2.56531	2.6517	3.38469	3.15268	2.71637	4.26889	3.36446	3.48677	6.6112	6.37782	3.7234	6.6674	6.65704	7.74952	8.73292	8.78341	8.93298
	Csa5G139030	0.00336769	0.0206756	4.22292	4.70335	4.99686	4.6056	4.66392	4.3351	4.69508	3.37192	6.62062	5.48287	6.30192	3.71479	5.35164	5.59023	6.69728	7.02207	7.46032
	Csa2G348260	0.00472874	0.0271849	6.09013	5.04126	5.19024	4.40483	4.66899	5.13785	5.14156	5.62268	3.9109	5.07938	3.7954	5.57055	6.96266	5.98591	6.00366	6.44739	4.95566
	Csa3G872760	2.08e-06	3.73e-05	4.44324	4.01068	6.49186	4.54224	5.53196	4.79763	4.61911	4.8286	8.21152	5.48347	7.14865	3.72114	3.50285	3.69684	5.94134	6.87652	6.22715
	Csa2G427880	3.09e-05	0.000402953	3.24751	4.86169	6.09552	3.54423	6.18973	4.03437	3.98769	3.3003	6.69705	6.7663	4.5745	3.50043	3.92308	4.84417	7.59411	9.33256	7.9481
	Csa4G627170	0.00153911	0.0109717	9.98693	7.68532	7.34905	6.86982	6.51456	7.16048	5.78341	4.27818	4.42577	4.36717	4.52412	3.65318	6.08268	2.58373	3.18499	3.70878	2.31615
	Csa6G514940	0.00379724	0.0227321	2.46245	3.3585	3.05818	5.39796	4.67255	6.05618	2.4662	3.22288	8.0813	5.70111	4.76646	7.50482	5.34639	5.17386	8.04449	7.48385	7.81483
	Csa6G004480	6.12e-12	3.49e-10	3.8997	3.48724	5.49752	4.727	7.13657	4.02136	3.34119	3.98379	6.65171	8.57876	8.21376	2.53611	3.16244	2.98783	6.80812	8.43098	7.85055
	Csa3G735550	0.00394949	0.0234693	6.77919	6.08461	5.92655	7.25667	5.36966	5.57694	7.52413	6.99875	3.69359	5.53212	6.70938	4.17141	5.77171	5.25731	3.86648	2.44195	2.42372
	Csa3G483760	2.62e-12	1.58e-10	7.66395	8.25137	4.69984	4.93993	4.70125	5.2365	4.80341	5.33546	3.62464	3.41067	3.37708	6.51832	6.48651	9.08436	4.54979	3.60064	5.21031
	Csa7G432650	1.35e-05	0.000194131	2.06102	2.65182	2.99861	3.68333	5.1412	4.73593	3.58362	3.47212	8.39905	6.91718	6.97454	6.36406	4.97128	6.3147	6.61559	9.99223	6.63029
	Csa1G015680	6.8e-10	2.8e-08	6.12555	5.06569	4.80775	4.427	3.66531	6.94259	5.26031	5.59343	4.65777	4.44747	3.8155	7.50166	8.60248	9.08208	4.35669	3.44244	3.78958
	Csa6G152360	1.88e-05	0.000261333	1.24601	1.67094	6.4093	0.856283	4.4238	2.3765	2.78672	2.38121	5.97725	4.9446	10.9783	3.7588	6.02303	5.23712	6.38619	14.8698	11.2976
	Csa3G119630	8.21e-05	0.000943868	4.16575	4.16212	6.6143	6.90194	5.85787	5.04262	3.61582	3.09343	7.12386	4.67569	4.6426	4.82204	4.82857	5.18082	7.11934	8.60053	5.25632
	Csa3G880020	8.18e-06	0.000125476	2.53082	4.1809	8.12296	5.73419	6.25297	2.83661	2.81631	0.195766	8.33903	6.92835	4.24138	5.76841	3.10133	3.90994	9.38723	11.4099	6.04805
	Csa3G146440	0.00835708	0.0421591	5.08357	4.98046	5.70834	7.62962	5.36213	5.20911	4.13174	3.9171	6.35414	5.39245	5.55085	5.15272	4.98732	4.94651	6.09892	6.18775	5.30032
	Csa3G146320	0.000244917	0.00239749	2.82178	2.89566	7.27375	3.91364	6.43286	4.30557	4.18679	3.65928	6.11191	4.83617	5.87649	5.5128	4.91762	6.28275	8.92147	6.83407	7.21939
	Csa3G876000	0.00335473	0.0206093	6.10948	5.59167	4.73784	5.29537	5.13078	6.74648	4.05923	6.87151	5.58223	4.85189	6.12958	6.37379	6.20098	5.31155	4.64427	3.86435	4.55907
	Csa2G174080	0.0014732	0.0106049	2.08929	5.6758	2.28089	1.39713	2.70394	7.8987	5.88419	6.01557	4.68508	3.17757	4.29573	8.78712	6.27518	9.78803	8.52935	5.46384	7.21197
	Csa3G179090	3.26e-07	7.09e-06	2.4458	4.84855	8.95698	6.02174	10.7124	5.47375	4.12379	2.96684	10.4399	6.08692	7.68545	2.85067	2.40413	1.50285	4.78492	5.4175	5.57921
	Csa1G001330	0.00621238	0.0337504	4.41156	5.16778	5.6918	6.27085	5.19037	5.51184	2.76866	2.09402	7.62594	5.59849	4.64416	6.03961	5.9987	4.2167	8.44358	6.29289	6.54918
	Csa6G106700	6.61e-08	1.71e-06	3.92258	5.94523	3.46664	2.79941	3.67008	6.85402	5.61994	4.91256	4.3083	4.95121	2.71736	8.69227	8.7744	13.0461	3.57311	4.41701	5.00941
	Csa6G110820	0.00132888	0.00978018	4.01616	5.62958	4.3583	3.62881	4.61762	6.85652	4.87777	5.32066	4.444	4.16108	5.63505	7.84987	6.22211	8.63853	6.57574	5.85698	4.02887
	Csa1G569400	0.00487629	0.0278599	2.06428	3.2307	1.70798	1.26929	1.95574	3.13132	4.83608	2.52123	1.74519	4.67388	2.84499	12.0722	10.9252	16.0507	8.89613	6.69901	8.17861
	Csa7G004040	0.00649709	0.0349093	1.1896	2.42377	4.15583	1.19325	4.05887	4.28573	4.04493	4.60095	6.77786	5.2985	6.85315	5.00321	5.35945	7.72152	7.00716	11.5019	11.3714
	Csa3G122310	0.000721102	0.0059092	8.2394	6.09745	5.09176	6.61261	6.47435	5.82035	5.60089	8.21911	4.09996	4.77514	6.71674	4.3247	5.60336	6.26386	3.32671	2.41003	3.47475
	Csa7G044810	0.00962842	0.0467901	3.83781	6.30668	2.38155	2.57433	3.84992	4.36621	5.24477	7.03103	4.11813	4.44348	5.18349	7.2758	7.09812	9.65438	5.61911	5.62461	8.68875
	Csa4G036610	0.000142245	0.00150442	4.59423	3.97524	6.17901	6.37921	6.43983	5.94677	3.30007	3.9543	9.12002	4.87843	5.50243	5.51777	3.68495	3.49071	7.82727	7.22795	5.30958
	Csa6G011690	0.00421441	0.0246696	3.54959	3.21138	6.13257	3.31448	5.27214	6.4369	3.33585	3.28932	7.74165	6.91766	4.74102	5.70134	6.31085	4.43954	5.90195	9.90313	7.20173
	Csa4G049610	3.2e-16	3.39e-14	1.53174	1.9648	3.80674	4.25843	4.00714	2.51571	2.59022	1.04545	12.1631	7.81836	5.89852	3.10802	1.70492	3.6758	10.4518	16.6669	10.3355
	Csa5G584380	0.000382897	0.00346205	0.0414888	0.0411236	0.5707	0.528768	0.263591	0.348763	0.307793	0.240696	2.97334	0.283949	0.564938	9.42264	8.97204	12.0182	18.2054	22.4045	16.3595
	Csa4G285810	7.61e-15	6.48e-13	2.37938	2.82239	1.18808	1.69852	1.19779	5.76158	5.13642	7.10561	1.20493	2.1738	1.42998	9.38273	15.9425	26.6282	3.68526	3.29729	2.56343
	Csa4G642280	0.00585837	0.0322964	4.20534	5.55777	5.19137	10.1925	8.67759	6.34505	2.09988	2.12693	7.99418	4.63874	5.76015	4.3449	5.4798	1.66589	8.94243	6.5414	4.12298
	Csa7G031720	0.00794237	0.0405645	6.49797	6.42078	5.61123	4.67231	4.31641	7.18537	5.3147	3.18441	4.71271	5.06082	3.52992	5.55645	8.2261	6.05999	6.38707	5.64944	5.6665
	Csa3G002710	0.00464441	0.0267647	4.82835	5.24463	4.17558	3.91027	4.11018	6.90996	5.3262	3.38091	5.82305	6.05776	4.02166	9.02964	8.72392	6.40921	6.1177	5.07379	5.04029
	Csa5G524820	1.66e-08	4.9e-07	1.58554	3.73783	5.01039	4.23264	4.62833	4.63149	3.93413	2.58551	7.88948	6.66168	4.93736	3.76736	4.21646	4.26189	10.3466	11.9327	9.9847
	Csa4G051440	1.9e-06	3.45e-05	3.60248	3.95335	4.67729	5.76645	5.50394	5.2223	3.55548	2.65724	6.00926	6.59152	5.71394	5.74981	4.95249	5.81404	7.50948	9.54524	7.56368
	Csa1G180750	0.00873868	0.0435655	5.382	4.60211	6.77182	5.73312	7.79136	6.34742	3.32232	6.20741	7.82134	5.02643	6.46185	4.08029	3.75217	3.35075	7.11711	6.85426	4.06967
	Csa6G091930	6.5e-06	0.000102071	2.50921	4.67095	6.31383	5.32992	9.91504	5.07114	2.66741	4.04759	8.99886	5.32544	6.15392	3.7364	2.05138	4.43205	7.90226	9.43388	6.14268
	Csa2G021580	0.00147384	0.0106055	5.948	5.37159	4.35063	4.77299	4.93363	4.84128	6.37382	6.1346	5.92042	5.46004	5.46868	6.01193	7.25312	7.01957	4.96051	5.29089	4.77759
	Csa4G011040	0.00242576	0.0159841	5.1697	4.10783	3.73611	3.26712	3.66449	5.18207	5.70533	7.2377	5.33197	4.2608	6.89172	8.97299	7.39146	7.42577	4.75421	5.65114	6.43243
	Csa1G364460	1.71e-05	0.000240594	6.37743	6.51	10.1005	8.8457	10.331	4.34367	3.5749	4.63861	5.11619	5.90957	6.87934	1.62715	2.83031	1.28673	4.39659	6.721	5.85737
	Csa6G067420	0.00218637	0.0146751	3.59756	3.20203	6.49237	6.55004	7.92977	4.14393	2.51914	3.74828	6.07817	4.80947	7.53641	3.49627	3.73113	8.71979	5.08684	11.5365	6.31639
	Csa3G011820	0.000198771	0.00200442	6.67927	5.21714	5.43341	4.28108	4.46225	7.44098	6.48743	5.00556	4.65136	3.77819	4.86761	7.50482	7.11398	5.46831	5.49044	7.0401	4.69701
	Csa2G379980	4.66e-10	1.97e-08	10.1416	6.6215	4.26807	4.8525	4.69134	5.54909	5.36035	5.0603	4.14855	3.6718	3.91551	8.38934	8.40205	6.11616	6.04985	5.0429	3.68089
	Csa5G092940	0.000329728	0.00306263	5.28606	4.61629	6.91105	6.61023	6.80482	5.93842	4.6549	3.23981	6.42624	5.7726	5.13494	5.04907	4.88593	4.65134	6.99235	7.44033	5.69224
	Csa6G523390	0.000241542	0.00237176	2.73056	2.77593	5.53774	2.90005	5.04133	2.18607	2.79186	2.68083	5.79627	4.86023	4.07012	4.74471	6.58623	10.6139	12.2008	12.2896	8.6587
	Csa6G500500	0.00213788	0.0143901	2.98214	3.64464	6.05926	2.82899	6.00891	5.49351	5.45036	3.46015	7.33383	5.23689	5.58001	4.73723	5.22802	5.53535	8.08471	9.87619	8.92555
	Csa2G336130	1.26e-09	4.78e-08	0.0489464	1.50398	5.771	1.55953	6.21943	0.352674	0.272339	0.397545	8.58806	6.84333	5.69076	0.179296	0.211695	0.141785	10.5334	33.1005	15.0892
	Csa6G491640	0.000557809	0.00475284	7.50853	7.59129	6.63967	4.78475	4.13435	7.48402	5.08295	5.8371	4.63886	4.40471	4.56152	5.68428	7.22562	6.38009	6.93633	3.13624	4.66534
	Csa7G446670	2.39e-05	0.000323595	4.32805	5.69733	9.79917	5.52329	10.1802	6.03978	2.96655	5.31954	7.50388	6.92441	10.0522	2.69457	3.36646	2.19691	3.6994	6.02254	4.57872
	Csa1G025080	0.00383777	0.0229053	4.63557	3.5418	6.35749	5.43614	5.47097	4.639	3.67184	4.08999	7.51776	4.76831	6.27163	5.77812	5.89984	6.62078	6.23489	8.0196	8.01994
	Csa4G043880	3.2e-07	6.99e-06	6.29786	6.63116	5.12257	4.41018	4.83665	5.81771	7.01686	8.21744	4.2187	4.71398	5.31594	5.74632	7.23367	7.70719	5.73946	4.38196	3.63856
	Csa5G636510	0.00242073	0.0159671	3.95779	4.02441	7.74383	4.56581	8.20104	2.49935	6.6127	4.98807	6.5345	7.20542	6.18254	3.9994	3.91048	5.1064	5.87395	7.80417	8.15359
	Csa3G610780	0.0034396	0.0210358	3.76165	3.49551	5.31295	8.23996	10.9537	4.79965	1.30812	5.45577	7.26247	8.27507	6.64889	6.31553	3.3047	3.17816	6.41688	4.20858	8.42761
	Csa3G848300	8.39e-05	0.000958631	2.31092	2.44778	1.51371	2.06936	2.08714	5.14219	6.63911	5.83586	4.25514	6.75609	4.39019	11.3699	11.9056	13.0164	6.35021	4.52882	6.84904
	Csa1G629050	4.74e-07	9.93e-06	5.73651	7.79095	4.36275	3.45637	4.61414	6.22651	6.52174	7.20004	4.08933	4.47614	5.34421	6.26364	6.94818	8.17546	4.89287	6.36323	5.07493
	Csa2G301450	2.81e-06	4.84e-05	6.29141	5.88744	5.98957	4.39927	4.924	6.85137	7.06635	7.61726	6.22871	4.01164	3.92934	7.34805	5.99986	8.90478	5.20976	3.76963	3.36186
	Csa3G126940	0.00570151	0.0315594	3.63188	7.31852	9.13684	4.19642	7.22663	5.79934	4.92244	1.94495	8.18625	5.97026	4.30581	3.41128	4.18594	3.54542	8.4213	8.85116	6.81948
	Csa4G608090	7.51e-05	0.000874179	6.74795	3.50139	3.20382	4.56943	3.98027	8.37546	5.83766	8.40763	4.02907	4.42789	4.88596	7.52062	5.4355	11.7632	4.37387	6.17037	4.65381
	Csa6G133810	0.00832481	0.0420407	3.2009	4.33917	3.74626	3.74954	3.33954	5.2006	3.18658	4.36939	7.03777	6.94946	8.52975	7.01216	5.80228	5.90875	7.41219	9.73714	8.38058
	Csa6G141400	0.000703631	0.00579341	1.3327	1.7833	3.07715	1.86363	2.98698	4.8546	3.97535	4.71627	9.49603	7.57908	9.51546	7.43121	6.12421	8.21425	5.73597	11.1331	8.59903
	Csa4G188990	6.6e-05	0.000783229	6.79938	7.53544	6.23527	5.91468	5.93809	6.15896	5.2124	4.92891	5.713	4.26728	4.87002	7.24276	5.92353	6.2027	6.10447	5.24214	4.39494
	Csa1G032430	0.00329693	0.020346	5.27157	5.03045	4.18222	5.25102	4.61121	5.89804	5.13144	10.5995	5.09766	5.09005	5.6931	8.07597	5.84155	7.80909	4.15903	4.85182	6.14241
	Csa7G235250	0.00573592	0.0316947	6.08997	6.58675	6.30041	6.54407	5.65199	5.74315	6.81018	6.08936	5.20104	4.48319	4.10873	5.66455	6.17814	6.24357	6.48706	5.2727	5.4576
	Csa7G387700	0.000575107	0.00487626	7.32568	5.96045	6.2348	6.35134	5.38245	6.08432	5.31456	5.37751	5.74717	4.74246	5.51564	6.26754	6.89718	6.35176	5.30121	5.13777	5.02175
	Csa3G895620	0.00334902	0.0205875	4.29839	4.92009	5.71392	5.66763	4.97425	4.93815	4.2082	3.72125	5.1961	5.47768	4.71137	5.49224	6.66216	5.98796	10.7709	9.67444	6.77389
	Csa6G147460	1.29e-07	3.1e-06	1.63932	3.5814	5.22655	3.74864	4.78246	5.2631	4.29691	3.28014	11.5128	13.5419	7.93713	2.71656	5.66126	3.44039	6.12853	10.0813	6.516
	CsaUNG003730	9.13e-08	2.29e-06	8.41382	10.1733	5.80442	3.99271	3.47525	6.73603	10.2926	6.99299	3.68664	4.259	3.43767	7.28623	6.38763	5.35854	6.64006	3.50131	3.13727
	Csa6G227540	0.000230637	0.00227994	4.45915	4.69615	4.65512	4.58793	4.46351	5.85697	5.78274	5.45687	4.95024	4.29165	4.59769	9.27316	7.68428	10.2933	6.29018	5.82045	6.45207
	Csa7G069170	0.00138881	0.0101236	4.33126	4.67475	4.63391	6.54237	4.79014	4.79681	3.57026	5.41641	8.44397	6.30504	7.30915	5.69997	4.9434	5.39038	7.83061	6.31758	8.62557
	Csa6G147660	7.07e-09	2.27e-07	9.29711	4.99978	7.23978	2.20593	4.13681	15.5	8.52985	12.6809	3.60519	2.94938	4.19568	6.58182	5.93531	4.82282	2.59569	2.36067	2.30451
	Csa4G554170	0.000562547	0.00478679	3.95284	5.34279	5.80967	5.7248	6.19192	5.21768	4.57445	2.04685	7.38688	6.83516	6.53557	5.98334	6.57002	4.19531	8.50487	7.76473	7.37752
	Csa1G072460	0.00119527	0.00892427	3.39955	4.83349	5.06504	3.81773	4.04233	8.26535	5.76243	6.78968	6.47301	4.03213	5.31203	8.26794	7.77342	10.3589	5.4116	6.09662	4.46161
	Csa4G638520	5.69e-11	2.83e-09	3.10162	2.45946	4.13583	7.38827	7.45995	3.56506	4.76636	4.42136	9.36209	10.2238	8.40031	4.27412	3.54529	3.37992	6.41891	6.83009	10.4829
	Csa3G217150	3.72e-05	0.000471778	5.95046	6.29572	4.86118	5.5032	4.46016	7.58743	5.9831	5.5467	4.79154	4.34704	5.53241	7.91884	6.79546	6.84315	6.31678	5.11984	6.3911
	Csa2G350370	0.00441314	0.0256802	5.76667	5.11817	6.85101	7.1854	6.3457	6.58565	3.19811	4.22016	7.172	7.38854	7.83648	5.38454	5.56284	4.36721	5.57885	5.88488	5.87718
	Csa3G889840	7.73e-07	1.54e-05	7.47001	6.58471	4.45417	4.05768	5.10218	7.05326	5.65812	10.6854	6.94021	5.18494	4.80809	6.99754	6.01153	6.71737	3.71137	4.90536	3.98594
	CsaUNG025520	1.02e-05	0.000151804	5.6824	12.7399	2.39279	2.58647	5.73048	6.49897	10.7899	7.69212	5.01522	3.43927	2.69254	5.28642	9.06994	8.75279	3.69273	6.8621	1.45496
	Csa4G083620	3.42e-08	9.33e-07	4.91701	4.97066	6.06639	7.31406	7.48442	5.36798	2.48713	2.04219	8.59556	7.30674	5.94034	4.75874	4.04785	4.22175	9.37026	8.36296	7.17715
	Csa4G054280	0.00353906	0.0215062	7.05228	6.76102	6.78308	5.52542	7.92225	7.25914	4.64069	7.26287	4.87737	4.52138	5.69147	5.64662	6.48244	5.85271	5.06264	4.53331	4.57841
	Csa7G451970	0.00115998	0.00872228	5.85424	4.93951	6.73842	7.3224	6.67286	5.82468	3.47717	3.78928	7.17386	6.40967	5.87855	6.35072	5.84606	4.82353	6.51381	6.77234	6.18577
	Csa6G108590	1.34e-08	4.05e-07	1.9493	3.24324	5.60898	5.39755	8.03519	4.09656	5.16475	2.18098	9.03226	7.41922	6.63574	5.27038	4.74233	2.95776	9.64688	7.75432	11.4795
	Csa7G041990	0.000276885	0.00265456	10.4054	17.606	5.21169	5.82781	7.2952	12.2272	13.2867	7.02704	5.173	3.04012	4.70444	2.20855	3.29617	0.627954	1.53608	1.15204	0.145702
	Csa4G580380	0.004593	0.0265305	2.02759	5.0106	4.39373	4.63138	3.88223	5.60363	5.35747	7.2834	10.2616	10.5094	5.12032	4.84979	3.42368	3.67424	7.46432	6.90562	10.5206
	Csa3G823610	0.00447618	0.0259837	5.45244	4.58697	5.98749	7.68872	4.99724	5.50232	3.48414	4.73153	8.0393	6.89883	7.48678	7.04926	5.301	3.84904	7.07055	6.37935	6.73401
	Csa1G135270	2.33e-09	8.46e-08	7.56463	7.34185	2.47751	2.17592	2.33627	9.08427	5.84582	10.6058	4.67352	5.70111	2.47608	10.0064	5.7937	13.9999	2.97791	3.29132	4.89604
	Csa4G003670	2.82e-10	1.24e-08	2.21974	2.91204	1.41122	0.832067	1.52088	10.5842	7.26513	13.4838	3.22679	3.12774	6.01774	13.6317	18.2833	7.94299	1.85046	4.67478	2.34029
	Csa4G193760	0.000646719	0.00540061	6.69668	6.39526	4.3264	3.83222	4.1769	5.65507	7.71299	6.74119	4.04283	6.06907	5.3168	7.46748	5.75301	7.76534	6.03483	7.02477	6.50369
	Csa5G148490	0.00115877	0.0087166	3.97011	5.90275	5.25757	7.51642	7.76805	4.97494	5.20231	5.05712	6.98509	8.18516	7.05124	4.68957	3.12622	5.75019	7.92765	6.48031	5.92976
	Csa7G062920	5.32e-15	4.69e-13	6.90506	14.9809	3.32108	2.87192	6.74923	14.4389	10.926	6.55519	0.477318	1.51075	1.77022	6.60357	12.5829	7.97291	1.97692	1.24856	0.923159
	Csa4G296180	9.11e-05	0.00102842	3.28624	4.80026	3.99359	2.57174	3.06768	6.02347	6.6563	5.06729	4.38113	4.22763	3.44213	11.6155	8.27542	11.4818	9.48691	7.39638	6.61334
	Csa1G256170	0.00957838	0.0466299	6.22985	4.79332	8.18397	6.1596	7.56252	5.02201	4.89944	2.35624	6.10292	5.28336	4.99317	4.28675	5.30328	6.72998	8.23809	10.2005	6.04563
	Csa5G606740	0.00369814	0.022253	4.99806	4.85365	4.99374	6.90437	5.13146	6.12377	3.60144	3.1543	8.01175	6.35597	5.35895	6.88629	6.20754	4.84234	10.0504	6.71699	8.41339
	Csa1G065960	0.000499701	0.00432734	3.63025	3.42017	4.90884	5.68793	7.61192	5.17963	2.99983	6.92295	8.57154	8.22322	8.28256	6.45151	4.5082	5.24061	6.75399	7.97122	6.31331
	Csa4G641580	0.00253056	0.0165185	6.2094	5.51956	5.7753	3.75506	5.4753	6.87299	6.0451	5.1792	5.92502	5.53088	4.42083	6.77246	7.74139	8.51345	6.03127	6.87848	6.20492
	Csa3G418790	0.00838392	0.0422232	4.49003	5.77902	4.41162	3.84345	4.89635	5.95536	6.77391	10.4195	4.14029	4.84861	5.75592	7.61003	6.5215	7.70035	6.54259	6.59803	6.88648
	Csa4G652690	0.00333696	0.02052	4.97797	7.75367	4.65813	4.27991	1.75703	5.83565	11.2109	8.52633	4.1006	4.17173	4.9658	10.8541	8.33003	6.52329	8.21181	6.60078	0.424863
	Csa7G420890	0.0096046	0.0467174	4.50672	4.14527	6.4544	5.35433	6.61218	4.74702	5.2949	3.65595	6.65401	6.1053	4.8405	4.89662	6.77255	7.81814	8.35943	10.3692	6.77687
	Csa1G569310	0.0054232	0.0303092	4.39952	3.45466	7.46647	4.12645	5.80811	5.07748	3.97387	8.41949	6.77754	6.92703	9.81488	5.72081	2.7183	3.08952	4.97834	9.6598	10.9917
	Csa5G608060	1.24e-05	0.000179895	2.53459	3.81612	4.53934	4.94085	5.33371	5.74076	3.80828	5.28612	7.13575	6.1482	6.82187	6.65976	6.14023	6.04094	8.42001	10.6569	9.5073
	Csa5G622680	0.00859503	0.0430406	4.48019	5.83212	6.43628	5.54097	6.23038	6.47591	4.24143	2.57881	8.0508	6.95364	4.81523	6.38461	6.55176	5.08276	8.66951	8.2829	7.35205
	Csa7G127380	7.19e-05	0.000840803	4.57996	4.47087	5.65907	4.67999	5.10683	5.25001	3.95759	2.43563	7.67409	5.47862	6.17822	6.10069	5.77749	4.72385	9.16047	13.578	9.22449
	Csa4G179100	0.000744575	0.00605224	6.31017	6.14458	5.7818	4.89372	4.56553	6.88891	5.52562	5.51807	5.41902	6.65802	4.41924	8.54097	7.26312	7.00425	6.93501	5.96261	6.21323
	Csa4G312300	8.64e-08	2.18e-06	6.29617	7.61373	4.66029	5.03752	3.06679	7.76262	5.76084	6.03914	5.13461	5.33507	4.08879	9.53295	7.71551	11.7131	3.56913	6.01108	5.01545
	Csa4G286980	1.97e-09	7.19e-08	1.55884	19.3139	0.765807	0.496678	0.825314	25.0846	18.3587	1.62784	0.770454	0.762046	0.163278	6.28121	11.7986	12.6435	0.327282	1.86031	1.86262
	Csa1G169420	0.00358217	0.0217099	2.39021	3.14054	4.04156	3.24701	5.12079	5.00647	2.78356	6.19166	7.89864	7.60865	11.994	7.33029	5.58961	7.46058	8.40278	9.45299	6.90759
	Csa1G088470	0.000183401	0.00186521	4.1445	3.71678	4.02365	3.35371	2.87346	6.2806	5.58202	6.41178	5.73069	4.82396	4.70285	9.09701	10.563	12.1485	6.16357	7.26205	7.78201
	Csa1G658520	8.96e-05	0.00101695	1.37387	1.14676	3.69441	2.45751	5.66595	5.12326	3.55391	6.20857	8.66663	6.92835	11.5881	6.26873	5.7075	7.54059	7.28712	11.8654	9.67688
	Csa1G025790	2.26e-14	1.81e-12	7.38218	5.77674	3.02856	3.93395	3.89473	6.53223	7.95071	9.58734	4.38477	5.97672	3.96113	9.58322	10.1386	9.97934	4.1331	5.38382	3.71403
	Csa4G290180	0.00110802	0.00839778	6.83615	6.403	5.79245	5.92828	7.50434	6.25123	4.94359	10.4789	5.96709	4.35366	5.38674	7.88772	7.52729	8.47818	5.5304	2.99386	3.14745
	Csa3G589580	8.45e-05	0.000964576	8.00011	8.62124	6.12381	3.95194	6.40265	5.92074	10.1362	9.55231	5.40234	4.68399	5.35904	4.25949	6.13561	7.32056	4.3456	3.88554	5.39094
	Csa2G401380	0.0075814	0.0391046	3.31647	6.88763	8.66732	7.02068	9.5797	5.06644	5.37688	5.41872	7.248	4.8528	6.80578	4.38011	5.36676	4.66189	6.82093	8.39141	5.71504
	Csa3G790960	6.66e-11	3.25e-09	6.43266	6.79075	3.9395	5.16561	3.26728	7.80864	5.7551	5.13766	5.38506	4.19286	3.68844	10.3875	8.80261	10.1501	7.30179	5.37441	5.99904
	Csa1G495260	0.000171348	0.00175668	6.37805	6.26646	4.61755	5.58553	6.75362	5.37496	7.57485	7.40041	3.52565	4.43077	4.33652	6.89975	8.10622	11.7768	4.4049	6.67681	5.54863
	Csa6G148170	0.000231432	0.00228662	3.23118	3.79455	8.31648	4.32698	10.0412	3.50069	4.75515	5.09391	6.46615	5.56288	10.3373	5.70366	4.74694	5.3243	6.26779	11.1421	7.17619
	Csa1G447420	5.07e-10	2.14e-08	2.96379	2.29206	6.91209	4.35843	6.41458	4.57609	3.56391	2.90981	7.445	7.10105	9.68839	6.91966	3.45114	6.35254	9.8809	11.8871	9.22316
	Csa2G369220	5.9e-06	9.37e-05	4.41091	5.23956	7.80787	5.72574	7.71027	5.46516	3.92809	4.83362	7.39673	5.95549	6.27019	3.5051	4.12586	5.61119	9.37109	10.4096	8.2404
	Csa1G011440	8.93e-15	7.53e-13	2.83382	2.38462	5.59767	5.9097	8.36129	2.4637	2.65528	2.29479	8.84502	10.3178	5.92102	1.24351	3.62266	4.71724	16.2997	10.2308	12.6096
	Csa4G269170	0.00041383	0.00369791	6.44897	6.31612	5.06909	6.42526	6.30844	7.09912	7.27613	8.1597	5.44515	6.18514	6.41713	6.65578	5.97687	6.43458	5.27086	5.46675	5.39403
	Csa1G063480	0.00168532	0.0118283	8.17809	8.4145	5.50242	5.99502	6.1653	9.07372	7.08926	4.8992	7.13943	5.4754	5.49342	4.7758	5.76694	7.38162	5.31901	4.46437	5.36389
	Csa5G178700	2.19e-06	3.91e-05	1.58972	5.02891	6.38077	3.87971	5.12162	3.65567	2.94841	4.43474	8.94381	8.43283	4.95995	2.76711	4.24239	4.63767	12.2144	11.4368	15.8428
	Csa7G212680	0.00929742	0.0455923	4.94047	5.21108	5.22216	6.13439	5.97873	7.09186	3.94035	2.69072	7.91991	7.8863	5.92916	6.47219	6.82148	5.92479	8.16507	7.72089	8.53652
	Csa1G064860	4.76e-05	0.00058617	7.87467	5.99617	5.32891	5.04023	4.63856	6.6384	9.81725	7.32164	4.83285	5.40471	5.62626	9.48791	7.72514	5.84121	5.63878	3.16366	6.41826
	Csa6G454440	0.00408454	0.0240767	8.30895	6.38169	6.11221	5.03608	5.43556	7.0526	6.1319	6.86467	5.37526	5.74193	6.1514	6.05546	8.23155	6.59481	4.38406	5.49442	7.58911
	Csa6G318140	0.000897227	0.00706701	4.71694	6.48294	6.25906	7.04976	6.95139	7.12444	4.83643	3.97782	7.69104	7.14355	6.29046	5.09157	5.95467	5.10631	7.38924	7.774	7.11786
	Csa3G563290	0.00242973	0.0160011	6.26962	7.36802	5.36707	5.06386	5.88349	5.47776	6.28406	6.62119	6.00732	5.06541	6.01649	6.7157	6.7588	9.3345	6.60134	5.86177	6.4597
	Csa4G622820	2.98e-11	1.54e-09	6.46208	10.9563	5.95937	5.05708	4.62176	9.25782	6.8336	11.773	3.43202	2.93734	5.46238	6.7138	8.3356	10.0163	2.91579	3.55151	2.91247
	Csa6G491070	0.000280966	0.0026862	2.34184	2.73786	4.6609	2.2321	4.03753	5.69669	5.15078	5.95699	9.94224	10.0979	9.2142	4.50918	6.23297	7.21858	6.96543	12.2718	8.00005
	Csa3G127120	0.00174601	0.0121824	3.99224	6.63878	8.07199	6.16734	12.5772	7.52814	6.45584	3.63683	7.94974	8.35493	6.98088	2.6992	5.06583	2.67609	6.58078	6.10309	5.95297
	Csa6G046370	0.000627756	0.00525953	3.05567	2.9682	4.98384	3.50496	6.4065	3.66952	2.60695	6.7364	8.83505	7.11041	11.3302	7.83529	3.70046	6.19606	6.22301	11.3654	10.9535
	Csa5G180920	0.000727515	0.00595407	2.66191	4.47928	5.53497	5.06254	5.89951	4.23742	4.99439	7.39826	7.57262	6.96039	7.45674	6.27382	4.08305	5.3199	11.0475	7.75711	11.0214
	Csa4G526570	0.00848953	0.0426242	6.28285	3.11378	2.81817	3.7716	1.44626	7.21695	3.29314	5.5467	5.73805	4.67388	4.00575	12.8416	8.41791	14.9028	8.74623	9.10077	5.87525
	Csa3G728650	0.00101831	0.00786796	5.30762	2.65702	4.45113	5.03919	3.54808	6.9211	7.8801	7.80685	5.73016	5.97558	4.68897	10.1467	10.2605	12.6312	6.92248	4.69193	3.45926
	Csa2G023880	0.000129422	0.00139353	4.95748	49.314	8.5241	3.76085	6.28054	4.99658	8.2094	2.25977	2.84402	3.02937	2.50359	3.24282	2.20156	2.47891	2.13744	0.528237	1.05779
	Csa7G043670	5.51e-06	8.81e-05	7.2641	12.4045	3.18046	4.00638	3.96737	9.51918	11.3926	7.09767	4.06268	3.8626	5.57969	6.09989	7.33076	5.14366	5.37805	7.12275	5.20784
	Csa6G008010	9.06e-05	0.00102539	6.62952	6.70596	7.08162	6.26469	5.09392	7.45096	7.50348	6.33126	5.83913	5.10231	4.80737	8.96665	7.99534	6.13872	7.12004	5.35897	4.38728
	Csa3G183380	2.64e-12	1.58e-10	0.0930044	0.58999	2.37589	0.711196	0.827241	2.27843	1.91468	1.03596	10.8023	4.36472	5.06564	3.40686	5.24934	5.35229	26.8295	20.3299	17.6251
	Csa4G022330	8.31e-05	0.000952271	9.7664	8.08346	7.01611	7.33053	6.27651	7.42875	6.76951	5.88519	5.01383	6.24265	6.12529	6.14472	8.64588	5.07044	5.59603	4.13432	3.58884
	Csa1G569170	2.88e-06	4.95e-05	4.58785	5.96224	5.40929	5.84714	7.66486	4.4076	3.92359	3.2531	7.49549	8.2236	7.63536	5.35297	6.22839	5.61127	8.40154	9.83498	10.172
	Csa3G895860	0.00987461	0.0476642	4.46949	5.70731	6.60694	5.28147	5.88387	5.58495	5.22759	5.79328	7.71175	6.49576	6.60049	6.41615	7.48848	5.81253	8.60184	7.94877	8.41972
	Csa1G059720	0.0046391	0.0267513	3.52749	3.20985	3.97726	2.5181	4.71494	6.25002	8.6874	5.83745	4.57302	6.04966	2.4834	8.89685	11.8801	16.6396	6.43479	6.84366	7.60071
	Csa2G354990	4.8e-12	2.8e-10	7.0886	5.95276	2.32161	2.50953	3.64876	8.63084	7.76042	8.79602	4.01447	2.69524	4.64053	15.3875	11.3905	11.6929	2.06705	5.09139	6.47017
	Csa6G519570	5.79e-09	1.91e-07	4.26552	3.70601	8.17511	5.36923	9.31221	5.62833	4.10209	6.4157	9.69527	7.20819	9.4873	3.53654	2.79006	3.35599	8.18166	9.47918	9.6902
	Csa3G368690	4.56e-06	7.47e-05	4.97261	4.28595	8.21377	8.18977	7.02056	4.93301	6.68303	7.02396	10.3295	15.9945	11.0208	1.05595	0.389615	2.08759	4.00962	5.44695	8.78335
	Csa5G201310	2.9e-17	3.5e-15	2.43358	2.59421	6.02283	4.26708	5.73721	3.80471	3.38513	3.06341	8.39688	6.15037	7.91157	6.98021	5.95774	5.71938	12.436	16.1651	9.4642
	Csa5G631480	3.93e-06	6.56e-05	5.60951	4.53728	7.4094	9.13325	8.5455	6.29153	3.58245	3.00873	10.2661	7.8128	7.64935	6.20325	4.549	4.85436	7.02751	8.55218	5.50127
	Csa2G172510	7.59e-08	1.94e-06	3.38133	9.56124	4.17834	2.37946	4.70071	9.76538	5.32867	6.45064	4.10116	1.94708	2.71605	9.9039	12.83	15.6037	6.38058	7.38564	4.06508
	Csa7G351880	0.000295589	0.00279731	4.05731	5.64104	5.27069	6.56495	6.80477	6.1804	3.86351	4.80246	9.58922	9.18507	5.93256	7.14858	5.59418	5.7056	7.94675	8.28664	8.32946
	Csa1G050360	5.72e-06	9.11e-05	4.74325	8.87629	4.75711	3.32361	3.00103	9.00506	7.46485	4.86415	4.54765	4.57981	3.17473	9.20422	10.4702	9.82515	10.3098	7.14425	5.9028
	Csa5G600960	4.77e-07	9.98e-06	1.69266	2.9799	3.84747	2.38802	5.69801	6.09808	4.4513	5.62812	11.987	12.0538	9.55276	5.39836	4.9716	6.07412	7.66452	11.3815	9.35796
	Csa5G056630	5.34e-05	0.000650435	6.99286	10.5438	5.85178	5.00372	8.78516	10.0345	8.87531	6.66979	5.38203	4.34555	5.02788	4.52253	8.74653	8.49745	6.43881	3.5656	2.37215
	Csa3G172970	0.00683279	0.0361728	6.46975	5.71577	7.31029	7.52859	6.7018	7.06006	3.97803	3.1496	8.82836	7.49441	5.64229	6.78353	6.44802	4.79395	9.96611	6.93771	6.89031
	Csa6G344240	0.00890379	0.0441627	2.65345	3.69466	7.88343	2.61686	10.1684	7.20756	2.98793	9.23635	10.4605	6.8564	10.1908	6.40279	4.37192	2.0131	8.48915	12.0005	4.52938
	Csa1G089490	0.001421	0.0103227	4.46433	8.41624	7.35362	4.97385	8.24945	7.88405	6.98108	6.95735	4.16421	4.06528	4.03427	9.08519	8.70771	8.62135	5.92704	4.61388	7.26935
	Csa7G206930	0.00569298	0.0315305	5.94849	6.58668	7.52955	7.52245	7.61338	7.31509	4.76254	2.43539	8.79584	7.35285	6.36163	5.14759	6.49947	4.7261	7.61344	9.55762	6.07253
	Csa3G009490	0.000689233	0.00569453	5.92449	6.02936	5.94555	3.76861	4.4618	6.96246	7.60935	8.27103	5.71543	6.25708	6.00641	8.16246	7.53638	8.19849	6.75146	8.00291	6.43552
	Csa3G238170	0.00143165	0.0103757	5.07417	5.66348	4.90177	2.30963	3.79268	6.19592	6.24761	9.00445	7.00739	5.33629	5.2702	9.47586	9.0827	10.7049	5.59526	8.98998	7.48963
	Csa5G139690	0.00962359	0.0467785	6.58132	5.7333	7.10902	7.90154	5.67032	6.89709	3.96134	3.79442	7.42491	7.63364	6.44393	6.46377	6.89513	5.88116	8.64678	7.96798	7.15566
	Csa3G146310	4.9e-17	5.72e-15	8.4043	6.87826	2.27272	2.62046	2.61261	7.12965	12.9417	7.33596	4.09666	3.31695	2.09979	10.1678	13.6725	19.9526	1.86164	2.68379	4.3301
	Csa2G285370	0.000265899	0.00256212	13.8966	8.48496	10.0493	12.3977	9.88841	4.5392	5.8764	17.543	3.43419	3.26085	5.00719	7.73753	5.04868	2.46897	1.51717	0.995052	0.265677
	Csa6G538680	0.00326365	0.0201864	4.837	5.55145	4.21058	4.37116	3.27977	6.72586	5.66594	7.82774	5.76701	5.72482	7.06635	10.4135	6.97341	12.6596	7.30479	6.11849	7.95968
	Csa3G205280	1.36e-17	1.71e-15	9.90409	9.02778	4.59961	4.29547	3.30468	7.83989	6.61516	11.4177	3.46277	3.7052	5.40376	10.5379	8.47071	11.3467	5.11491	3.51546	4.07158
	Csa6G485160	3.33e-06	5.65e-05	2.42009	2.26553	5.01987	7.78232	6.47768	5.00522	4.33264	2.57401	17.4851	7.19705	5.7387	8.86507	1.56278	4.05694	11.8911	10.0617	10.0809
	Csa4G652090	1.1e-07	2.69e-06	3.53752	3.79068	11.7424	7.85266	6.88422	5.66421	4.34442	3.73478	8.3483	5.76446	6.00862	5.64251	4.4797	5.5083	11.8433	9.73013	7.95878
	Csa7G291720	1.82e-06	3.34e-05	2.45517	4.86711	9.70661	5.71179	12.9058	5.51066	3.38805	6.20612	9.75106	7.77287	7.68426	3.06923	4.8037	3.41489	5.58425	9.91199	10.128
	Csa1G008470	5.49e-06	8.78e-05	5.54781	5.11742	5.09496	4.13654	4.07618	6.82546	7.32858	6.7261	4.78452	6.17691	5.66866	8.79249	10.014	10.8449	6.77474	7.56658	7.46775
	Csa7G440550	2.29e-08	6.58e-07	2.93061	4.51174	8.39325	7.68195	10.1679	4.64253	3.98977	5.28142	10.7864	7.13275	8.29451	6.16701	4.38232	4.75638	6.93838	8.8675	8.41906
	Csa4G046670	0.000787407	0.00633547	5.90176	3.80238	6.61053	7.2083	7.12419	6.166	4.04997	7.32712	8.75083	7.559	7.91259	5.90915	4.53076	3.3622	12.7627	8.04095	6.34672
	Csa3G732620	8.25e-09	2.59e-07	9.83609	9.24893	6.42713	6.76859	5.60235	7.10455	6.35598	7.86893	5.17052	6.16044	5.66772	6.43091	8.26907	7.08253	4.84722	6.05096	4.51153
	Csa5G149880	2.92e-06	5e-05	7.39299	7.10753	4.64234	5.15587	7.25935	7.07582	5.94513	8.75002	5.40313	5.3804	5.64764	8.00902	9.65661	8.39091	6.28264	5.28852	6.15484
	Csa4G022350	0.00776688	0.0398457	6.42927	7.24005	10.7114	5.91187	11.518	6.81593	6.44675	3.1447	7.41856	5.79878	5.51215	4.40749	4.36289	3.37978	7.65508	10.4913	6.47688
	Csa3G198490	0.00983778	0.0475673	3.67761	6.31704	4.61939	4.01684	4.11543	8.00472	9.95989	5.86727	6.42893	5.37304	4.66186	11.711	7.07176	8.07053	9.76125	5.83934	8.23933
	Csa7G429580	0.000104841	0.00116572	8.83577	5.49522	5.10675	5.70413	5.07551	7.55931	5.99804	13.6694	4.49552	7.62251	6.23042	7.82718	8.49224	8.53166	4.18306	3.33109	5.58937
	Csa6G031970	0.000206696	0.00207885	2.31667	4.15517	4.9318	4.86235	5.49024	6.95515	5.26854	7.04004	9.13284	7.01083	8.83961	5.85953	5.48698	6.76406	9.26461	11.1356	9.42488
	Csa6G190460	5.89e-06	9.36e-05	4.89789	5.75677	7.19225	9.11044	8.67219	7.77815	5.24937	2.99677	11.211	10.3887	5.98526	4.9184	4.42772	3.29502	8.27439	7.38629	6.42805
	Csa4G641680	2.8e-17	3.4e-15	7.77807	9.11938	2.96956	5.33415	5.03578	8.32647	11.2109	12.4285	3.56972	5.56231	4.05023	9.44305	10.1402	10.5574	2.70616	2.91731	2.97404
	Csa3G133960	6.16e-07	1.26e-05	7.14285	5.20668	10.8139	7.20247	8.03434	3.67141	4.61349	4.32127	8.41377	9.07603	6.43365	3.25791	4.32744	2.25428	13.1293	7.10356	9.92966
	Csa2G416190	1.75e-14	1.44e-12	5.07667	5.81032	9.2404	10.4732	9.51367	5.43861	4.08122	2.71214	6.99491	8.7308	6.75205	4.97242	3.41594	3.57948	10.0835	9.38922	8.77172
	Csa2G264570	1.17e-05	0.000170901	3.91126	4.01781	1.60706	3.17217	4.29218	3.92839	9.36442	8.16877	2.6361	6.67477	2.45807	17.627	16.455	20.7372	3.21007	3.04108	3.73879
	Csa6G080400	0.00032199	0.00300393	9.68166	5.64497	6.66391	6.81841	7.56548	6.65265	7.0097	9.07095	4.47809	5.9225	6.4533	9.79871	8.95692	6.89885	5.65241	4.37655	3.58807
	Csa2G348960	3.93e-05	0.000496064	4.79959	4.95676	6.24064	7.08156	6.05605	6.00536	3.8112	2.6344	9.48168	6.18189	5.68953	7.12382	6.05972	7.49274	10.1976	11.6614	9.85585
	Csa5G033470	0.00476447	0.0273409	4.58875	6.42927	6.94938	6.19274	6.35684	5.63487	5.0872	4.60372	8.18522	6.54419	6.86631	7.62519	7.94608	5.69676	9.67044	9.40152	7.58552
	Csa4G653430	0.00230024	0.0153101	4.74353	4.13757	4.19463	7.90961	8.73977	6.03824	4.6628	6.10932	9.61241	10.2959	8.34715	7.06628	4.97513	6.32078	8.41552	5.94398	7.87847
	Csa5G167170	0.0028187	0.0180429	16.2016	11.6005	8.38904	8.13917	6.08607	9.45308	5.75485	2.94786	5.81532	4.19428	4.27525	6.00095	7.56569	4.30311	5.94621	5.34323	3.3841
	Csa5G623670	7.77e-14	5.7e-12	1.32703	2.07688	11.3573	6.15687	23.0005	1.92912	1.97545	3.03898	10.8308	11.7113	13.4609	0.341128	0.264318	0.57324	4.25254	12.3638	11.0161
	Csa5G155470	2.45e-06	4.32e-05	4.07519	5.43342	3.72055	2.71945	4.27697	7.36241	7.3575	6.36034	6.28311	5.64157	5.25062	10.5684	11.8152	12.8495	7.38237	6.45574	8.44598
	Csa1G532370	0.0014884	0.0106942	5.8962	7.21407	8.32779	8.17019	7.0726	5.25519	6.66385	5.18444	8.02542	7.11591	6.51363	5.34337	5.42899	4.40339	9.57458	8.61242	7.37551
	Csa1G050030	0.0038903	0.023168	5.23237	5.81095	5.23482	6.38869	5.33828	6.16883	4.32092	3.96615	8.58887	7.16953	6.7207	8.37089	7.18551	7.02526	10.0634	10.1793	8.57948
	Csa4G061850	1.87e-05	0.000261167	6.60988	7.30858	5.53318	3.64947	5.88733	8.3389	8.3867	6.53421	5.51368	6.36924	3.4992	7.31335	9.28852	11.7279	6.48792	7.80754	6.18726
	Csa7G027280	0.00637539	0.0344202	7.25678	5.86958	9.77474	9.35385	7.34207	8.55942	4.0337	3.62284	8.32807	6.8424	7.93932	5.36381	6.65902	4.3456	7.59531	6.93847	6.74124
	Csa2G369080	3.54e-16	3.69e-14	8.13207	8.97376	5.54975	5.48843	4.45393	7.11982	7.31829	8.04116	4.90034	4.30833	4.61556	8.90237	10.5255	10.9466	6.72849	4.90021	5.79182
	Csa7G333400	0.00591052	0.0324982	5.85415	4.70748	6.95091	7.47853	6.86241	6.95096	4.05247	5.43402	7.94669	7.22311	7.22002	6.90651	7.07874	7.96149	8.55174	8.59352	7.4088
	Csa1G689640	1.79e-07	4.17e-06	1.9458	5.78603	17.0294	6.39109	22.855	5.32246	3.07419	2.55037	7.30189	8.0325	11.9267	1.18795	1.79223	2.47032	2.57221	6.02031	11.1945
	Csa2G409480	3.72e-22	7.23e-20	14.4185	12.5697	6.28684	7.96422	6.86732	9.31811	7.43719	5.81172	4.04255	4.10459	3.42686	7.49472	11.0822	7.79981	3.28251	3.45523	2.59464
	Csa1G042290	5.9e-05	0.000708593	4.49795	4.28606	8.04887	5.40024	6.51148	6.83672	4.71518	2.89941	9.31665	6.64966	6.78246	8.59643	6.71956	4.88865	11.1316	11.4748	9.24313
	Csa5G169620	0.00907326	0.0447747	6.21403	6.22203	8.43587	5.76007	7.81892	7.44336	5.63054	2.42171	8.7723	6.18375	6.26036	5.25144	7.07802	5.06884	9.21226	11.5106	9.10652
	Csa4G608110	4.39e-05	0.000545115	4.26824	5.65702	5.96705	5.4398	6.86976	6.56087	5.79014	5.06561	8.58899	8.29853	8.9414	7.56438	6.03916	5.91117	8.11638	9.79934	9.58808
	Csa5G025920	0.00125799	0.00931598	12.0417	8.78599	8.54489	9.4586	5.4899	8.58603	7.94852	8.53836	6.97452	7.31742	6.87576	6.17744	5.19903	4.03723	4.12586	4.11655	4.29652
	Csa2G418930	1.18e-16	1.29e-14	7.20096	5.69504	11.9311	14.8128	11.6542	4.93365	4.45651	3.71148	10.0591	7.64817	9.35274	3.85025	3.58981	3.13256	6.28617	5.32202	5.14446
	Csa7G039250	0.00118607	0.00887992	6.71879	5.69576	5.81972	6.97934	5.33582	8.28085	5.84802	6.63324	5.46178	7.40458	5.92631	10.2549	9.97313	9.5606	5.87763	6.91629	6.19718
	Csa3G734960	0.00153383	0.0109463	5.14182	5.68919	8.08325	6.37537	6.10301	7.95537	5.98798	5.35554	9.0129	9.09576	6.43781	5.89873	7.08532	4.71083	9.56523	8.89518	7.62982
	Csa3G144130	7.06e-07	1.42e-05	5.65041	9.78786	5.02301	4.88664	4.21669	9.07966	8.10929	6.24394	7.3475	3.52514	4.25564	9.46199	10.4154	9.87265	7.08968	7.92059	6.26932
	Csa2G369830	9.06e-07	1.78e-05	5.78668	6.48166	8.26074	8.62626	10.1941	4.89245	5.89562	6.8949	8.7854	8.29628	8.15404	4.6577	4.34898	4.40988	6.72843	8.77422	8.15465
	Csa5G604330	0.00231911	0.0154141	4.76977	6.2222	6.89505	6.12849	7.59047	8.64131	4.95702	3.27607	9.97516	7.1828	7.22126	6.54371	6.93576	5.10851	8.90637	10.673	8.41794
	Csa1G085390	0.000317558	0.00297276	3.03197	3.353	5.12096	3.32661	5.83728	6.86082	4.04321	3.77964	12.0441	8.1337	9.08117	10.1274	7.07148	7.59728	9.81161	11.1142	9.19184
	Csa6G513560	0.000431423	0.0038282	7.82899	7.0899	6.01396	7.71021	6.78273	8.37609	6.99612	8.58844	4.4411	7.68929	5.74025	7.8214	7.54171	8.83091	6.35074	5.91023	5.82544
	Csa6G009410	2.66e-06	4.63e-05	3.7754	5.43135	6.38854	4.65019	7.8011	5.91917	3.62264	5.32361	9.26517	7.45942	6.72812	4.80199	5.81146	6.43019	11.6422	12.6458	11.8418
	Csa5G576590	5.83e-05	0.000700728	6.69512	6.3791	6.59414	9.26283	7.87898	5.58718	4.67528	5.41712	8.75339	7.97237	7.31834	5.72052	5.53893	7.13777	8.76411	8.8025	7.41877
	Csa1G589110	3.89e-06	6.52e-05	4.26747	3.99919	11.016	4.44995	12.365	7.26783	3.59763	5.31163	13.8056	9.14126	13.369	5.54233	3.27192	2.92188	5.05	7.33054	7.23148
	Csa4G336750	7.4e-05	0.000863162	3.47301	5.38203	5.79338	6.17975	6.62777	7.82783	4.5666	3.75906	10.5202	7.71613	6.7597	7.61106	6.31944	6.33156	10.2573	12.3593	8.50097
	Csa1G008480	0.00441549	0.0256861	5.42441	5.59948	6.71252	7.12093	7.32726	6.98359	5.04839	4.66089	8.71933	8.18938	5.26198	6.38472	7.30244	8.14441	8.87499	9.83659	8.40846
	Csa1G404660	0.000999441	0.00773158	4.44281	6.68542	7.46386	6.94339	9.5551	6.27521	4.22672	8.25327	8.67533	7.94485	10.9467	5.42483	4.75405	4.71222	5.55802	9.18014	8.9669
	Csa6G062270	0.000907704	0.00712598	5.82055	5.0895	6.75705	7.14651	5.71184	6.96756	5.38043	4.58122	8.61209	8.08314	7.70817	7.22028	7.57629	7.10582	10.041	7.85323	8.43886
	Csa3G746550	0.00931932	0.0456764	8.20316	8.5968	6.96847	7.48716	8.27904	8.41446	5.34875	7.70864	6.59897	7.79058	6.53371	7.17318	8.2461	6.33253	6.01003	6.20351	4.28829
	Csa1G470250	0.0029389	0.0186001	9.82898	7.6423	8.84775	8.62629	8.35114	7.42136	7.58656	10.1753	5.23613	5.29408	6.47304	8.55201	8.78216	4.09179	5.80781	3.27782	4.36022
	Csa3G150210	0.000319969	0.00299092	6.95735	5.99662	6.12712	6.52423	5.7655	8.57854	7.9407	8.04556	6.1528	6.46103	7.18987	9.29072	6.9692	8.47038	6.98603	6.08601	6.86743
	Csa3G775260	0.00315443	0.0196575	5.59503	4.51312	5.02342	7.04881	3.71813	5.53738	3.79296	3.91751	7.81924	8.65821	5.73918	8.78704	7.78115	6.66925	12.4153	9.65111	13.9241
	Csa6G361360	0.000168606	0.00173323	5.50523	5.93038	6.40926	7.4576	6.00538	6.6361	4.52726	5.08604	9.54901	8.5308	8.18171	7.48308	7.27788	5.6367	10.2935	7.54096	8.83698
	Csa3G738990	1.97e-06	3.55e-05	3.05345	3.43619	6.94768	4.60845	4.81342	6.69959	3.89609	5.24776	11.5173	6.82377	7.21419	7.62496	7.32305	7.16031	12.677	12.8088	9.2173
	Csa6G517000	0.000217711	0.00216904	5.22255	5.36146	2.9322	3.36765	3.95006	5.00242	6.39977	9.66665	4.91665	5.16694	6.31687	12.2224	10.8905	13.6276	7.571	8.9037	9.95481
	Csa1G071880	0.00197993	0.013484	7.37048	10.0496	6.72203	7.06015	8.06589	9.06287	8.19211	5.58534	6.16584	7.48205	5.42992	5.74857	9.24681	7.5765	6.83027	5.99723	4.90908
	Csa4G652740	2.59e-05	0.000345708	6.18022	3.4556	3.2697	2.18794	3.02038	8.08781	5.65768	6.34346	3.81822	3.64098	4.56456	17.0275	12.5081	11.2465	12.1438	7.56459	10.7929
	Csa3G175740	0.0011471	0.00865959	2.25545	2.27778	7.52627	5.60445	13.0679	6.28587	3.07816	11.2086	14.6706	9.44485	15.1107	4.15697	1.10433	0.123273	5.80756	12.1886	7.67821
	Csa7G073750	0.00225172	0.0150449	3.20426	5.42577	6.16543	7.26714	7.28069	7.69591	5.54049	6.6612	7.29989	10.3123	7.86621	7.66202	6.24357	6.8003	9.14512	8.66367	8.53483
	Csa4G293080	1.65e-06	3.06e-05	9.74125	9.48612	7.47221	7.03339	5.42888	8.31184	6.57698	5.15562	6.49339	5.55575	6.39945	9.80769	8.96215	9.48849	5.69608	5.69363	4.54354
	Csa1G613590	0.000141339	0.0014965	8.12525	6.66744	5.10412	4.52699	4.65446	5.99847	8.5848	9.04129	6.66574	5.92556	7.53403	11.3037	7.20124	11.1253	7.97029	5.6299	5.96847
	Csa3G800660	8.44e-12	4.75e-10	4.51668	4.05211	5.70113	5.84748	8.69255	3.84037	3.11844	3.59579	11.284	12.0232	8.08056	2.25432	3.13698	3.91555	11.421	12.328	18.2392
	Csa3G878890	0.00519478	0.0293075	2.05487	3.81897	4.03798	3.06902	4.14776	5.01245	6.31217	5.51358	8.25191	7.78516	8.27307	7.44882	8.8874	9.92073	10.1116	14.1773	13.2741
	Csa5G167050	0.000301678	0.00284224	2.63841	5.40686	8.28593	3.97118	5.69038	7.48372	4.06782	1.72787	11.5803	5.90302	6.40875	4.0517	7.00075	6.22052	13.2368	15.7112	12.8811
	Csa6G190310	0.000360092	0.00328074	5.31639	5.98935	6.52307	6.55531	5.76675	7.31869	4.30481	3.5206	9.03646	8.89982	7.38854	8.13814	7.15045	5.70936	11.4614	10.239	9.11035
	Csa5G645150	8.23e-14	5.99e-12	7.25567	15.1702	2.84045	1.98671	3.66139	11.2319	6.5182	11.9703	4.48264	1.82891	2.96869	9.82845	9.0711	20.3063	5.47454	5.41182	2.43834
	Csa2G020960	0.00416882	0.02443	4.25539	5.92582	6.33576	5.90588	6.35812	7.86916	4.47881	6.33091	9.25807	7.22353	8.77777	8.09683	5.73032	7.15912	8.74249	10.9824	9.07758
	Csa3G730970	0.00300026	0.0189318	6.96511	7.40308	7.86744	7.48967	6.76831	6.73734	5.75029	5.7236	8.26286	7.54011	7.18633	6.44742	6.42303	5.24949	9.66388	8.74055	8.38474
	Csa4G334120	5.32e-06	8.53e-05	5.31459	5.36835	6.73651	5.47212	7.38884	5.57836	5.17297	5.4604	8.89782	7.79421	6.67153	7.75251	7.41337	6.2677	10.9026	10.5707	9.98598
	Csa1G065420	0.00496683	0.0282977	3.73383	2.3832	3.80759	5.16728	3.08508	5.60488	5.22001	4.62772	9.64663	9.87323	5.59975	12.1232	8.71677	6.60975	13.6594	10.1272	12.7761
	Csa4G637810	0.0101805	0.0487644	5.48774	7.19984	8.43099	9.19821	8.91707	7.28512	4.03418	6.25161	7.76708	6.88726	7.29479	5.99411	6.79675	6.93669	9.38493	8.67255	6.24722
	Csa6G139160	6.91e-15	5.93e-13	5.69306	9.51979	2.47657	3.09245	5.56812	8.40238	8.22134	7.91665	4.24217	3.18674	2.41255	16.503	14.9898	17.9181	2.87413	4.6677	5.29662
	Csa1G046820	2.62e-09	9.41e-08	4.26394	3.53356	6.73064	7.98074	9.17808	5.49826	3.75965	4.54189	8.63709	12.37	8.9324	6.6574	4.38369	6.74948	7.11779	11.783	11.0668
	Csa7G435550	0.000222201	0.002208	4.15297	6.70823	3.88614	2.3804	5.049	10.6078	7.98769	7.59767	7.95519	6.01542	5.89201	10.6785	9.36102	11.3936	7.15073	9.59325	7.06275
	Csa6G303220	5.98e-05	0.000715925	4.2155	6.21976	8.37863	6.3227	6.98523	6.64674	6.23681	5.78732	8.54875	7.58239	8.29163	7.22978	5.67147	5.49972	8.95192	11.3289	9.61264
	Csa6G520250	0.00363329	0.0219668	6.12868	6.19673	8.94786	7.00577	8.05333	5.49773	5.79749	5.11197	9.03256	7.91726	7.81155	6.88228	6.09444	8.29436	6.9246	9.91352	7.91125
	Csa7G396470	1.87e-05	0.000260982	3.15728	4.81101	4.83843	5.80563	7.90891	6.16833	5.1784	4.70224	8.90874	10.044	9.92114	9.03373	6.5984	5.66496	8.97858	8.69335	13.204
	Csa6G366280	2.03e-26	5.71e-24	9.4705	13.8857	5.30985	4.40226	6.88916	9.67178	10.8989	11.8713	5.08922	4.12955	3.90194	8.16836	9.44583	9.57517	3.46999	4.01782	3.60486
	Csa2G035440	0.000126861	0.00137138	8.38862	5.76424	5.76444	6.53167	4.57753	7.6944	7.03937	8.03143	3.46566	5.91224	6.49557	9.39449	12.4647	10.9324	5.21342	8.8287	7.3177
	Csa1G046210	4.06e-16	4.18e-14	8.75414	8.28875	5.56978	4.83731	4.70612	8.67485	9.37834	6.83314	5.55214	4.70448	4.77065	10.4948	9.47875	14.955	4.87123	6.22205	5.89573
	Csa4G031070	1.81e-09	6.66e-08	7.23959	6.63768	3.12472	5.02528	3.8877	7.2346	8.72762	5.70003	5.3992	6.72433	4.87478	15.2487	12.5246	14.4302	5.10277	6.24837	5.86995
	Csa1G294100	2.66e-05	0.000353661	4.04077	5.34028	6.48977	7.20766	6.96662	7.80757	5.23642	6.04093	10.8179	10.9658	7.81374	7.55904	6.60971	6.25272	8.51092	8.01133	8.60418
	Csa3G121750	0.0020855	0.0140773	7.89429	11.2482	7.90187	6.60262	9.82199	8.23588	9.15085	7.385	4.99911	6.07819	6.30492	5.18108	7.14872	9.43295	4.97229	6.82044	5.188
	Csa3G912910	0.00159692	0.0113119	1.3184	0.740519	1.12266	0.653443	0.884157	3.85258	5.01268	2.54956	2.00916	1.54682	1.473	12.0736	14.9681	36.3237	20.5757	11.407	7.98169
	Csa4G646170	3.27e-70	6.93e-67	10.674	16.0076	3.84296	3.77883	3.84766	13.5758	10.0856	9.54488	2.96207	2.6892	3.251	10.7841	10.7228	12.4995	3.3377	3.81446	3.34682
	Csa6G495640	4.59e-05	0.000568186	7.26734	6.29539	4.80029	5.86989	5.43196	7.26049	6.68265	7.05049	6.64045	7.37406	6.87644	11.8564	10.136	12.2654	6.95585	6.13415	6.05663
	Csa7G045500	0.00142161	0.0103232	7.0767	8.56628	6.46087	6.85083	7.02922	6.31734	8.18861	10.9723	5.02982	6.85775	7.93715	7.7233	8.7352	10.0381	6.63997	6.29041	4.48982
	Csa3G646600	0.0012532	0.00929129	6.81277	7.12067	5.83429	7.48903	3.92978	6.33499	6.93232	6.24388	6.2562	5.96115	4.88686	13.2386	10.0034	10.7249	8.98847	5.69442	8.77396
	Csa2G070320	0.00261687	0.0169674	0.906157	2.64533	3.51255	0.883301	4.17981	8.98877	5.50234	4.91137	16.1662	11.5054	12.5339	6.98732	6.84513	6.84394	8.32672	15.8508	8.67684
	Csa2G094900	0.00308836	0.0193342	6.70837	7.25672	8.49254	8.73468	7.95716	5.61596	3.85817	7.07266	8.88679	8.4193	8.68187	6.93099	5.54474	6.85118	9.41219	7.31296	7.55326
	Csa3G715370	0.000283348	0.00269619	6.02334	7.13338	4.76527	6.31413	5.13555	6.3879	7.76191	8.89489	6.2827	5.35372	5.81744	8.11885	11.8415	12.9161	7.96546	8.24626	6.54289
	Csa2G235600	0.000580254	0.00491554	2.40766	8.19701	3.29129	1.66768	2.32775	4.90269	9.90162	5.95157	4.78581	3.78687	3.50868	9.07517	13.1297	23.0458	13.4066	9.88999	6.25406
	Csa3G126190	6.2e-08	1.62e-06	8.77649	9.09323	5.49887	7.3962	5.42109	8.1338	8.33045	5.58974	6.64025	5.90713	5.34581	11.493	9.36933	9.96358	5.02389	6.65684	7.10523
	Csa2G433910	0.00115004	0.00867197	7.38506	7.07484	7.14671	8.00111	13.9763	6.8483	7.77764	5.16714	8.23863	7.82519	8.87559	3.82146	4.5343	4.76587	8.32396	8.37783	7.61223
	Csa7G430220	0.000568651	0.00483442	7.43124	6.36953	8.11181	13.6043	12.9449	7.098	6.06273	2.08333	8.90622	10.7514	6.29898	5.63311	4.93253	3.84904	7.68381	7.78338	6.24128
	Csa4G637710	0.000593292	0.00499933	7.84782	7.11673	6.28893	5.37928	6.24719	6.95129	9.08408	10.3328	5.02041	6.04038	5.82984	10.5339	8.6059	7.309	7.18666	7.58325	8.44614
	Csa2G279260	0.000219157	0.00218117	5.15671	8.31543	5.36915	3.59669	7.33481	9.61243	9.27853	11.6094	6.56195	7.29929	5.88501	7.33029	9.07099	11.4448	5.17094	7.11845	5.97772
	Csa1G574850	2.63e-06	4.59e-05	7.29065	11.7319	7.42865	4.63635	8.1012	9.40379	8.8476	14.151	4.55986	4.5761	6.22232	8.5175	5.45004	10.7769	5.33854	4.1176	5.00103
	Csa6G290800	0.00838972	0.0422232	6.35522	6.97421	8.12743	6.53542	7.39706	6.96563	6.26763	5.1793	7.47873	6.63275	7.63405	6.6514	6.81712	7.08619	9.61013	10.3331	10.125
	Csa1G538280	0.000219062	0.00218117	3.27446	5.25875	7.43232	5.81084	6.45176	7.64052	7.39914	5.48257	10.8576	8.32789	5.92613	6.88304	5.2884	5.64313	12.2485	12.3044	9.97957
	Csa3G121770	3.35e-09	1.18e-07	2.44038	4.76523	6.13827	4.04329	5.81418	6.65251	4.72979	3.85091	11.6092	8.0885	10.4035	6.64494	5.67317	5.53751	13.7314	13.8094	12.3054
	Csa7G433350	1.1e-05	0.00016188	3.67946	4.7348	5.83507	6.68447	5.91254	6.70545	4.01072	2.47167	10.4089	8.83585	6.86281	9.53726	8.1663	6.73166	12.5703	10.9456	12.2254
	Csa2G008690	0.000474003	0.00414242	5.19218	7.30599	7.50223	9.25565	7.74022	6.67536	5.11703	3.4493	9.40953	9.85431	5.97166	7.85644	6.84701	6.64532	9.83241	8.54529	9.78049
	Csa1G073040	0.00684885	0.0362377	5.7385	7.39734	7.24506	5.49469	6.54867	7.56971	8.27181	7.21032	6.17215	7.29669	6.44671	8.78588	9.38759	10.68	6.67954	8.63433	7.53185
	Csa6G488310	0.0075376	0.0389103	7.98991	6.99075	6.332	7.2636	5.76212	9.35807	5.83906	6.61916	6.92702	7.50643	5.54483	9.13369	9.04803	8.66737	7.52462	8.9433	7.83797
	Csa6G510900	0.00195644	0.0133479	6.66363	5.3127	6.6896	8.46192	9.81707	6.08868	5.6421	1.51274	11.2766	7.08164	10.4696	5.12956	6.26532	7.55329	9.42837	13.1099	7.09678
	Csa3G386830	0.00532847	0.029912	6.3057	3.87181	8.00492	7.23049	6.02704	5.02595	5.38179	4.07909	8.68784	6.98355	8.53365	10.7657	6.6371	9.15995	10.6029	11.0437	9.33486
	Csa6G367190	0.000229752	0.00227238	4.0856	6.61166	8.52005	4.60486	7.94605	6.70868	6.10837	5.6112	8.34509	9.45646	8.8208	5.59953	5.58961	5.63569	9.3656	12.3552	12.354
	Csa7G018720	6.17e-07	1.26e-05	4.95718	5.35357	15.9931	12.6514	9.98892	7.41905	5.21449	5.19377	10.8334	5.8956	10.5784	4.83329	2.12	1.82175	9.43687	9.60229	5.87904
	Csa1G005520	5.5e-21	9.29e-19	5.05566	8.43244	2.55351	2.37205	3.20342	14.9709	9.67787	9.94165	6.47268	3.43428	4.29592	14.528	16.0262	14.3117	4.26286	5.81535	2.64442
	Csa6G095350	0.00353178	0.0214756	6.37543	6.15624	9.37594	9.87278	10.0609	6.61888	5.98847	6.92012	9.7581	8.40495	9.86597	7.43307	6.35981	5.00423	6.39045	6.21765	7.42129
	Csa3G827230	9.25e-05	0.00104258	5.18933	7.2339	7.71916	7.00456	9.19466	7.10077	7.11295	5.54137	9.3754	9.13665	7.03797	5.85672	5.36511	5.74935	9.44102	10.8973	9.28859
	Csa3G133380	4.81e-05	0.00059249	1.41497	8.10828	9.94904	4.03876	6.60183	2.33642	2.41928	1.847	8.63257	6.35514	6.7157	1.24181	2.34273	3.54376	16.8034	25.1095	21.3982
	Csa4G047940	1.16e-08	3.56e-07	1.86735	2.14707	8.43984	6.34644	6.16922	5.74076	1.10827	3.55335	9.41398	5.18509	10.875	9.02924	4.84583	5.62562	13.1731	20.7993	14.7264
	Csa6G525490	0.000831287	0.00662808	5.96081	6.47018	8.30001	7.51539	7.93817	8.10245	5.88376	4.64621	9.94092	8.6883	8.82907	6.80952	8.20476	6.51483	7.8698	9.18298	8.21486
	Csa2G369140	2.79e-06	4.83e-05	6.26981	5.21457	7.57649	10.3329	9.5388	5.36573	4.00982	6.52225	7.83617	7.39836	7.47304	5.89575	5.84422	5.56691	10.7428	9.96218	13.6056
	Csa6G516540	1.37e-19	2.11e-17	2.34857	7.08277	1.47291	0.742998	1.69319	10.8014	13.809	7.59531	2.28452	1.51453	3.08806	19.9518	20.2613	23.9801	2.20317	5.7149	4.65721
	Csa5G606530	0.0096985	0.0470348	10.0452	6.15777	6.18673	5.21135	4.68284	8.24444	10.1355	9.4807	4.16339	7.70058	6.46302	6.86564	12.3188	6.40532	6.07947	9.90619	9.1594
	Csa7G420700	1.72e-08	5.07e-07	2.05867	0.802463	2.49999	4.0044	6.53968	0.555557	0.793664	1.39562	9.00313	9.49854	5.37869	1.89234	4.57697	9.69338	31.3726	15.6426	23.7142
	Csa3G565330	7.73e-16	7.68e-14	3.31995	3.35789	5.75839	6.29647	11.766	3.98689	2.16767	3.34112	14.9856	7.84992	15.1517	3.51604	3.11354	1.53742	11.4157	18.0245	13.8843
	Csa1G039320	0.00944954	0.0461598	8.8306	8.95377	8.1928	8.48697	5.73299	8.17073	8.02787	7.99531	7.62003	6.62396	7.03567	6.61091	7.10635	8.75032	7.20329	7.11201	7.02282
	Csa3G797580	0.00502031	0.0285172	6.20563	5.87641	7.04996	7.41467	6.16036	7.31919	4.7014	5.59313	10.2694	8.74886	9.43079	9.16719	7.42882	6.9818	10.5278	7.96234	8.67289
	Csa6G426380	0.00223789	0.0149683	6.18712	5.79769	11.8261	6.46071	8.9463	8.24172	6.72595	5.51989	9.60437	6.07464	9.4486	6.34849	3.12007	5.19602	6.95895	11.5564	11.5242
	Csa3G033800	4.42e-07	9.32e-06	4.19406	5.50616	6.38591	8.17129	9.29381	5.57028	4.1984	3.38388	9.0261	8.93439	7.09863	9.39435	7.41797	7.91169	9.82607	11.8224	11.4167
	Csa4G627190	0.00150484	0.010781	12.6849	10.8899	9.53811	8.86274	8.79177	8.81257	11.0244	7.37127	5.28504	5.24787	7.04959	4.83864	7.18657	5.18276	5.50255	6.25544	5.16088
	Csa6G292420	0.00288318	0.0183448	9.33906	8.30292	9.21101	9.12373	8.56795	6.72054	6.41272	12.9867	6.73876	6.97017	7.01919	8.74837	8.47921	7.02136	4.56514	4.99834	4.51474
	Csa1G695390	0.0100839	0.0483871	5.73273	6.03859	6.95248	8.51997	7.61292	8.42937	5.28109	4.45638	11.1746	8.23171	8.12512	8.82493	7.69196	7.05173	9.99031	7.75213	7.98029
	Csa5G471600	0.00165426	0.0116618	2.70969	4.64054	5.05851	4.90839	4.94149	9.99711	4.24384	4.03484	9.87707	8.55134	6.93788	10.1832	6.99916	6.83179	12.7056	14.6866	12.5733
	Csa3G113390	0.000104571	0.0011634	7.79123	9.61455	8.08559	7.17817	7.28917	7.55275	8.99512	9.621	6.80465	5.26194	7.2759	6.87715	9.33783	9.1848	6.96362	6.56589	5.60819
	Csa2G307340	0.00702938	0.0369468	3.14199	5.55626	7.05128	4.74008	10.2835	5.87415	4.33743	5.21988	9.61757	5.65521	13.4259	10.3324	6.17693	8.8947	8.54573	11.4691	9.98304
	Csa3G850520	8.06e-09	2.53e-07	2.19768	5.58549	7.0039	7.69054	9.99457	7.816	6.0356	6.01528	13.2642	14.1594	9.82746	5.36691	4.1737	3.53674	7.15777	9.58299	11.0762
	Csa4G607030	0.00016937	0.00173921	5.70725	5.22186	3.59461	5.90607	6.97306	9.48982	11.2636	11.0368	7.59447	6.43851	6.13125	11.2572	9.17742	19.4998	4.30142	3.92944	2.9726
	Csa3G182200	0.000163393	0.00168966	4.80694	6.1501	6.09636	10.8986	12.1294	6.67329	3.47761	6.28948	10.7418	9.83293	10.2128	7.78432	4.60777	6.61661	7.58714	8.95073	8.26934
	Csa5G612810	2.88e-07	6.35e-06	8.8558	10.1602	7.65063	7.7515	7.80209	6.75493	9.29006	8.81898	5.3707	5.27232	6.18391	8.486	9.14818	10.2118	6.80768	5.80205	6.86001
	Csa1G467120	8.49e-06	0.000129601	3.57179	7.19566	7.22394	8.22745	9.9956	10.1384	4.86085	5.59753	11.3774	11.1342	8.69712	5.09761	5.06579	5.06131	9.56864	9.9414	8.53574
	Csa6G517970	0.00468671	0.026967	4.7358	4.79364	5.0806	6.70042	6.25505	8.5207	4.17444	5.126	10.442	7.80435	7.39685	11.0544	7.36431	7.61057	11.2781	13.3304	9.79779
	Csa3G857050	1.36e-08	4.1e-07	10.6289	8.91453	5.79701	8.23766	7.74498	8.70401	9.09839	10.4353	5.87041	7.99385	6.59652	7.93268	8.72101	8.66281	5.47454	5.31819	5.62403
	Csa7G378530	3.94e-06	6.58e-05	3.22978	6.99555	9.01084	12.1541	13.2999	4.69263	4.65904	6.47715	8.81916	11.6566	11.1931	6.86493	3.49223	4.27366	6.82288	6.50334	11.7682
	Csa5G605000	0.00615646	0.0335039	6.71565	4.3024	7.99316	5.56682	9.01896	5.63876	7.01247	6.33506	9.10759	8.72794	6.80545	6.23338	7.76317	7.59163	8.65471	14.1991	10.373
	Csa2G047780	0.000554817	0.00473308	2.18188	5.3391	7.36923	7.60366	10.2522	4.83097	6.89199	7.12017	14.3224	10.3996	7.49888	5.82783	7.44615	7.17622	8.9471	11.5953	7.49536
	Csa1G044860	5.41e-05	0.000656635	5.03505	6.04647	5.48624	8.98118	7.1429	7.67444	4.39982	5.16804	10.2095	9.90877	9.77021	7.52734	6.21197	7.91593	8.87713	10.7209	11.2613
	Csa3G914600	0.000587023	0.00495746	3.44417	5.03683	5.49211	5.21707	5.61993	7.79748	3.92694	6.87878	16.1158	10.3782	5.08604	5.99795	7.38704	5.39733	14.2845	10.4441	14.0327
	Csa6G502640	0.00569652	0.0315409	4.27187	5.83725	7.52512	8.45832	12.1163	8.09813	7.18724	8.60328	11.8388	9.93449	7.86235	6.14757	5.64179	6.42297	7.4314	6.82775	8.38577
	Csa6G504620	0.00851537	0.0427202	6.14627	6.66153	11.8521	7.13784	13.4421	5.86339	6.23235	9.93074	8.94302	7.63796	9.80713	5.89164	3.41602	5.15822	6.39184	7.94049	10.2268
	Csa6G491650	1.82e-05	0.000253843	13.1613	8.99688	7.58052	8.09773	5.76675	8.93814	9.34313	8.10941	4.93481	5.67966	5.41917	8.3123	11.3846	7.27442	8.38506	7.49228	4.01289
	Csa3G778430	1.89e-06	3.45e-05	5.14122	6.92873	10.8562	6.70567	7.21086	7.90708	3.76393	6.06997	11.2564	9.61233	9.02238	5.45162	4.82755	3.65788	13.54	10.8089	10.1308
	Csa4G620640	5.12e-07	1.06e-05	13.2157	11.3682	9.83881	8.99665	9.15462	8.84418	12.3634	7.22797	6.61819	4.80986	5.79316	6.0069	6.98744	7.16745	4.91986	5.35564	4.24345
	Csa7G341220	2.58e-07	5.74e-06	4.69525	5.55622	9.74435	8.2433	8.11712	6.78918	3.73208	6.33732	10.2415	8.01014	7.62787	6.6691	6.16468	7.35562	11.8696	9.67239	12.1365
	Csa6G504410	0.00255502	0.0166513	1.85848	7.00008	5.20418	6.02021	6.29734	6.36071	7.15229	7.97862	14.2376	11.0841	7.98122	4.76548	3.31568	7.35752	14.3396	11.9213	10.2151
	Csa1G246600	4.17e-05	0.000521985	6.06667	4.54064	4.92673	5.91725	4.58851	7.43407	10.3906	11.9234	4.2835	5.50779	5.38182	10.3556	11.9814	18.7093	5.65374	8.00337	7.69277
	Csa1G574790	0.000571045	0.00485045	3.1227	5.0154	6.61929	5.25117	7.71535	6.87502	3.61975	3.5897	10.1107	6.53025	6.48107	7.73178	7.97218	12.703	13.8105	14.4349	11.8156
	Csa6G450430	1.16e-06	2.24e-05	7.74714	7.37367	6.79713	5.71179	5.34345	8.64907	6.76679	6.51493	6.96718	5.76772	5.3353	13.0756	9.4782	12.925	9.27672	8.52917	7.30362
	Csa2G123070	0.00979279	0.0473956	4.99724	6.74587	6.64016	7.83476	7.35771	8.45873	5.95817	4.14162	8.64459	7.77085	7.17844	7.26407	9.26283	7.95017	12.3404	11.4541	9.66751
	Csa6G011640	0.00870163	0.0434394	8.67927	6.49832	8.85711	9.69274	7.13929	8.58877	7.53047	12.7934	6.39777	7.28397	7.02307	8.09611	7.24987	10.5027	5.98289	5.37156	6.05328
	Csa5G322500	1.1e-07	2.71e-06	2.7967	3.3265	5.71853	5.04147	6.89923	5.46441	2.76172	3.99924	13.1316	9.60725	8.89893	9.70933	9.12093	8.65602	9.20438	16.9435	12.5541
	Csa3G118090	0.00984798	0.0475903	7.21282	8.8217	7.62564	7.07814	6.74427	7.59806	6.102	13.4589	6.82758	7.54695	9.23384	10.0432	7.75334	9.2861	6.73046	6.12445	5.69525
	Csa5G202330	2.52e-05	0.000338676	5.77185	7.20969	8.5934	8.88241	8.26331	6.50698	5.32515	6.5262	9.86086	8.66636	6.84761	7.47914	6.46377	7.16554	10.7271	8.90302	10.8025
	Csa1G654910	0.000123863	0.00134507	8.15485	10.0342	4.97324	7.4664	7.14625	15.5338	10.6915	6.52553	6.60173	5.49869	6.47989	6.5238	10.0337	13.8477	5.60872	5.5931	3.36003
	Csa1G453990	0.000133152	0.00142644	9.12627	10.3205	6.66815	6.94235	7.39432	9.00791	7.75098	5.86444	8.25335	6.77509	6.77186	9.55159	8.90233	8.27757	7.42438	8.31234	6.74349
	Csa2G382490	3.72e-09	1.28e-07	3.2778	4.97025	7.84879	5.02592	6.32102	5.8653	4.91172	2.46831	9.28043	8.91387	7.5032	7.28899	7.08832	6.28805	14.1055	17.81	15.1216
	Csa4G050260	7.64e-06	0.000118165	7.01713	7.93476	11.5513	8.30645	9.68248	6.79774	6.9421	4.35272	9.00162	8.82562	8.61298	6.46192	5.59544	6.06409	9.4057	8.4775	9.26512
	Csa7G428170	0.00339865	0.0208389	1.71368	1.75007	3.64815	1.07549	2.55693	4.95777	4.7675	3.94663	7.95655	5.00108	7.39746	6.34083	6.12032	12.3601	14.0919	37.6486	13.2477
	Csa3G145790	0.0102005	0.0488357	5.94944	7.79035	7.03005	7.23328	9.69834	8.96837	5.88012	4.55968	11.3364	9.16918	7.82236	7.68507	7.56712	6.63661	9.38471	9.1242	8.75514
	Csa4G638410	7.34e-41	5.6e-38	11.2544	13.5379	3.82632	5.34321	4.89312	9.75605	10.7822	7.91287	4.53563	4.15366	3.70822	11.9447	13.1159	13.062	5.96592	4.70678	6.14496
	Csa1G629040	7.47e-11	3.6e-09	6.88382	13.4028	7.32725	4.35184	6.85529	9.74288	11.0194	13.6924	3.84787	4.64718	5.92279	9.60617	11.5192	15.6677	3.44114	3.83048	3.03554
	Csa7G390090	6.25e-15	5.47e-13	10.1964	13.6193	5.68114	6.66926	7.50511	10.9008	12.9149	11.2537	3.45702	3.4041	4.3632	8.27483	10.4872	15.1884	5.41718	2.78241	2.74872
	Csa6G490240	0.000363084	0.00330169	6.79854	8.10309	10.0775	8.30806	10.4695	8.28524	6.13332	4.40187	9.14715	9.09246	6.82212	5.88263	7.20579	5.75411	8.75809	9.59916	10.1292
	Csa1G042330	0.00834415	0.0421161	5.86902	7.04289	7.64259	6.71536	8.76676	9.05908	7.4019	4.84857	10.4234	10.1452	7.55723	7.01342	8.30896	5.84837	9.29915	10.1637	8.99507
	Csa7G374570	0.00787174	0.040297	6.92664	6.04267	7.72886	8.21524	9.46315	8.39684	6.26124	7.14958	9.15271	9.99817	9.26927	7.52388	7.79665	6.43506	7.01903	8.84429	8.98146
	Csa6G416810	0.00181696	0.01259	6.06376	6.29661	7.23457	8.22907	8.40823	8.61114	5.31077	5.24889	11.774	9.69282	6.30099	7.75666	7.12891	7.2956	10.8113	10.5772	8.56807
	Csa7G453000	3.52e-10	1.51e-08	9.47241	13.4524	7.58638	6.93235	4.84652	7.83844	8.52578	11.4064	6.58984	4.39717	5.50281	10.4484	10.1561	11.4906	7.77121	4.23518	4.8983
	Csa3G627720	0.000361523	0.00328927	7.17725	5.64017	10.3636	7.22266	10.4341	8.04764	4.76198	7.54555	9.52984	7.92837	9.65671	5.95544	5.91683	6.56649	8.99136	12.2052	7.93632
	Csa2G279250	2.75e-08	7.64e-07	4.44551	4.79329	7.22298	7.02458	10.3331	6.51044	3.65997	3.67357	12.674	9.81657	9.83518	10.0354	5.97913	6.19796	10.927	13.3494	9.71681
	Csa2G369050	0.0042677	0.0249481	6.30062	7.54839	8.78707	8.47523	9.80068	9.67678	7.06207	3.94227	10.3749	10.2967	7.09036	6.31041	7.24896	6.12148	9.18331	9.20475	8.91287
	Csa2G432230	6.44e-06	0.000101327	9.97004	9.17005	9.3841	7.56803	7.13319	8.01788	7.21879	8.75429	6.62204	6.46928	7.71462	10.2362	11.3629	9.56907	6.53745	5.27024	5.58087
	Csa4G099750	0.00225301	0.0150474	4.01419	10.1767	7.88818	3.77142	7.3295	5.56222	5.79853	3.61265	9.82467	8.30229	8.4092	4.80722	4.78555	5.01896	16.3696	19.5767	11.4685
	Csa1G145970	0.0032258	0.0200041	8.32947	8.67597	10.23	9.18385	10.9876	5.42523	6.21867	7.37133	8.80934	9.48963	9.31608	5.77483	7.02189	5.00971	8.04003	6.63395	10.3745
	Csa4G337320	7.54e-05	0.000877273	5.04108	5.96142	6.59589	10.0718	12.8427	8.78096	4.76736	4.48819	11.3785	12.2242	8.93974	7.58753	5.3158	6.96401	8.54047	9.77852	7.66355
	Csa4G646260	0.00298038	0.0188188	5.66103	7.63672	9.11655	6.68698	7.54415	7.32886	7.88735	4.83823	9.21281	8.47779	7.34687	7.41812	7.28555	5.19955	11.3057	12.5231	11.5157
	Csa4G003700	0.00800853	0.0408097	6.08086	5.09133	6.88845	8.26662	7.40856	8.72855	4.89599	2.70602	11.2086	9.27471	6.5941	9.32924	10.4117	6.78339	12.4966	11.3976	9.52261
	Csa5G600900	0.00265731	0.0172004	6.76901	8.53441	7.52872	4.37101	8.1424	9.29938	10.2192	8.95361	7.49411	8.44476	7.85583	7.47176	9.42696	11.8956	6.90691	6.92027	6.89112
	Csa3G806230	0.000226294	0.00224282	7.10987	7.19186	6.48418	7.12522	6.87221	8.75709	6.999	8.46107	6.8479	7.41484	6.60694	11.6198	9.81651	11.4419	7.73163	8.70249	8.05979
	Csa3G890030	0.00415355	0.0243855	6.32442	6.37471	7.47428	7.36029	7.45141	8.79299	6.07965	3.88613	11.2486	9.00521	7.46413	9.11455	8.14823	6.81203	10.8097	11.4808	9.55792
	Csa5G210020	0.000468276	0.00409989	10.3324	7.70862	8.92391	6.81433	7.58799	8.739	10.6377	9.02368	6.0746	7.08777	7.38956	8.5804	8.82949	7.72395	7.14359	7.43045	7.36776
	Csa1G064680	4.02e-05	0.000505372	9.19341	9.47307	6.07607	7.69182	6.44316	7.82349	6.80806	7.52066	7.88634	7.14555	7.72438	10.4179	10.6556	11.3357	7.88043	6.24871	7.0731
	Csa3G166330	3.71e-10	1.59e-08	10.4254	7.05712	5.04673	5.23919	4.30802	7.87827	8.48887	10.9164	5.84397	4.97222	4.36797	10.2459	14.6269	12.9147	8.38168	7.53581	9.17573
	Csa5G175740	0.0103577	0.0493813	6.84147	7.8932	7.06354	5.6216	7.2778	8.78507	8.30775	7.11314	8.39492	6.70444	7.41424	9.68489	9.92586	9.19959	9.50405	9.19226	8.51458
	Csa2G110250	1.01e-06	1.97e-05	5.00277	4.36906	3.87919	2.52741	3.29296	6.982	7.02159	7.24801	5.3462	7.08574	4.81521	14.3634	17.2513	15.7712	10.4751	10.085	12.0847
	Csa3G119420	1.12e-05	0.000164073	4.70883	5.20782	7.59737	6.89627	7.87281	6.72621	6.20529	5.06104	8.39067	7.46314	7.42425	7.02064	6.00258	9.33283	15.0897	14.7389	12.1414
	Csa2G008110	1.06e-05	0.000156594	3.73277	3.31551	6.14441	8.46954	7.44317	6.4911	5.25975	4.94984	12.9085	13.366	8.40361	11.7794	5.03202	7.48946	8.9821	9.85914	14.3075
	Csa2G049930	1.77e-22	3.53e-20	12.4196	14.5847	4.98816	7.5548	6.16543	9.1278	8.6179	11.6148	4.99716	4.85149	5.37772	10.7519	9.42806	10.4689	5.96177	5.61939	5.65493
	Csa6G499200	4.24e-22	8.16e-20	11.9603	11.6904	3.59072	4.93993	6.44956	10.9717	13.8127	14.7127	4.17354	5.0348	4.00188	13.387	10.238	12.1368	2.49948	3.41417	5.22685
	Csa3G816120	0.000214436	0.00214537	5.67167	7.07539	8.76329	8.23293	9.65023	8.84176	6.07833	4.41035	10.4658	10.4175	7.46114	7.6745	8.07426	6.45904	10.1641	10.3731	8.56509
	Csa5G585970	0.000242176	0.00237677	5.08858	5.68921	5.42624	6.94124	6.25647	6.63212	4.58466	4.61707	9.23767	8.46486	7.6034	10.6304	10.0915	8.82557	15.0128	12.9273	10.4315
	Csa1G031730	9.74e-11	4.59e-09	4.58004	5.97456	8.58042	6.0741	8.99588	6.78252	4.07119	5.50693	12.0221	8.70069	11.5582	6.4327	6.28649	6.14095	12.2067	13.9713	10.5766
	Csa4G646330	0.00788336	0.040324	4.93496	5.32139	7.24379	6.84542	5.35223	7.00384	7.19739	5.63924	8.20425	8.21707	6.21852	10.2438	8.78011	8.82267	13.6107	11.7044	13.1693
	Csa3G002320	0.00577228	0.0318678	7.82595	7.38353	9.7628	11.5403	11.8782	8.4628	7.02432	2.62355	10.0735	9.53063	6.03932	6.4421	7.14439	5.4946	9.77145	9.94412	7.68499
	Csa7G430820	4.94e-05	0.000605924	4.75809	7.70536	3.42395	2.77582	3.97385	11.2669	7.08464	8.00902	9.68828	7.86261	4.49243	15.4655	12.4633	12.9418	8.6531	9.93037	8.48799
	Csa3G745000	2.77e-13	1.89e-11	16.0942	18.1579	8.74409	7.94818	6.91468	8.22366	12.5668	11.0636	4.71276	4.18107	5.53851	5.11578	10.8724	8.39789	4.61053	4.05171	1.93343
	Csa4G411390	2.05e-06	3.68e-05	3.94055	6.38695	12.1022	6.05397	13.7249	6.45835	6.22827	3.3932	11.0242	7.68122	7.86555	4.99313	6.02938	6.22189	9.88634	11.8059	15.3396
	Csa1G433100	2.65e-08	7.45e-07	8.89987	9.79656	6.42028	5.92012	5.33197	9.28146	9.44774	7.41875	6.4245	6.64063	5.93666	9.32281	10.3068	12.325	10.1541	7.56987	8.1996
	Csa2G009470	0.00163316	0.0115375	9.36915	6.10454	6.45891	5.63641	4.2551	7.29105	9.35672	14.8494	5.45106	8.19946	7.22865	8.66674	12.6572	10.9868	4.42479	8.40541	10.5426
	Csa5G576580	9.54e-10	3.76e-08	2.98957	4.76699	8.04584	7.79979	10.0474	5.61935	4.15852	7.2392	13.0093	8.51466	10.9598	4.28523	6.67583	6.71467	13.5086	16.0937	10.173
	Csa6G058190	0.0100244	0.0481768	5.55402	5.0726	5.57398	6.29904	6.21714	8.38484	6.27253	3.13009	9.80384	9.83261	5.85903	10.1241	10.1448	6.60782	14.9092	15.2487	12.1588
	Csa4G179700	0.000144926	0.00152769	2.6869	6.76567	6.42779	6.00868	7.12165	8.85831	4.19406	3.17569	15.0328	7.35892	9.94639	7.70278	7.59695	6.84864	13.7702	16.9622	10.8081
	Csa1G001430	0.0005414	0.00463099	7.21548	6.40042	9.58883	8.80636	8.93535	6.22704	3.87863	7.23688	7.43473	11.144	11.1701	8.72078	8.14563	6.58927	9.96248	9.80287	10.346
	Csa2G023890	5.54e-08	1.45e-06	15.0583	53.7477	9.83931	6.77537	5.18411	7.30462	8.94259	7.22983	4.9495	3.98892	4.27337	2.80784	3.36869	3.22317	1.3238	1.91805	1.68407
	Csa2G354710	1.89e-12	1.16e-10	13.1251	10.4265	7.38684	8.08542	6.84029	10.2423	10.033	7.47705	6.98669	6.11517	6.45199	9.41133	11.3055	8.54043	6.59899	7.57101	5.03893
	Csa5G506320	0.00104312	0.0080239	6.10267	8.87181	6.86221	6.04937	9.04685	13.0287	5.91077	12.5096	8.75549	3.77888	9.02004	15.3586	7.99162	14.9935	4.84037	5.56335	2.99781
	Csa7G044860	0.00190326	0.0130505	1.26541	11.3367	3.53865	1.39564	1.49453	6.77981	7.40183	8.01887	4.87112	1.5703	1.88619	10.7563	16.1031	29.5595	17.9331	11.6648	6.28067
	Csa1G009710	0.00174765	0.0121895	7.54804	6.30593	11.866	12.5974	10.6186	6.60403	5.1997	9.63374	9.59302	8.5395	11.4073	6.31985	4.31389	6.55943	7.47089	8.68613	8.63249
	Csa1G570120	0.00134274	0.00984039	4.41867	6.94837	5.51665	7.90389	6.57855	9.25614	5.1143	5.28114	11.6175	9.71229	8.45615	10.1011	6.64572	7.57078	14.5435	11.6963	11.7108
	Csa3G829260	2.22e-11	1.18e-09	3.35455	16.402	3.71627	1.86508	4.17192	21.3048	14.8651	8.4376	7.09374	2.57541	3.46651	13.3877	11.1736	18.7172	4.4196	4.85862	3.28196
	Csa4G646180	0.00102255	0.0078906	13.5199	9.99015	11.8442	11.1996	8.01602	7.86466	7.1437	7.90791	6.94005	6.33796	7.48752	8.99959	10.3938	7.73842	7.48088	5.67405	4.66867
	Csa5G640540	3.36e-08	9.23e-07	8.57122	6.39451	10.6843	11.0794	10.5617	7.21614	6.67554	5.83966	9.55434	8.84244	7.93943	5.82881	6.89307	6.05254	10.4227	11.1632	9.49443
	Csa4G658610	0.00278092	0.0178429	10.288	10.3289	12.4544	11.1301	10.8002	8.69079	6.01404	4.05314	10.3991	8.34382	6.65395	5.92107	5.46638	5.23736	10.7226	9.3226	7.50256
	Csa3G684690	3.41e-08	9.33e-07	7.56872	7.68659	11.1853	9.29042	9.82094	4.8426	5.72433	5.03882	10.5403	9.3107	7.44038	4.6966	7.17756	6.70919	12.9601	11.0747	12.4166
	Csa5G593400	0.0045329	0.0262729	2.07561	7.58087	10.3963	5.2715	9.19747	9.29298	8.22223	6.5967	12.9628	9.08797	8.93259	5.48202	6.31813	7.18889	9.42614	13.6641	11.8884
	Csa6G106800	0.00587782	0.0323849	2.92353	10.5964	6.04506	5.32946	4.25079	7.33606	8.17377	9.61953	6.25427	5.88739	7.12991	15.2913	10.1438	18.8334	6.64191	6.81298	12.5132
	Csa6G518190	0.000336091	0.00310961	3.41945	7.73988	7.57196	5.42044	6.16078	5.33216	5.91603	8.40887	13.8737	13.1235	10.2638	5.48395	3.7525	8.13121	12.8048	13.6026	12.8064
	Csa2G234570	0.000307736	0.00289074	3.95819	5.18566	7.47379	6.68965	5.90423	8.22536	5.23458	6.15018	9.65409	7.26882	6.77773	9.11986	7.36877	9.20595	17.524	16.8411	11.4332
	Csa1G041560	0.000211979	0.00212526	9.85377	9.08208	8.14772	8.20922	7.23605	7.9913	8.06973	9.41388	6.04034	9.18372	8.1229	9.87547	11.6508	10.8244	6.28709	6.92333	7.76784
	Csa4G052070	0.000101805	0.00113727	8.39329	12.6429	7.72724	5.82585	9.51735	8.65082	9.62202	14.6464	6.36956	6.33236	8.72219	9.28016	7.93198	9.95502	6.17463	6.63826	6.31747
	Csa7G431340	0.00102027	0.0078787	12.8709	9.02163	10.6161	9.99286	7.7752	7.57735	8.62163	13.4438	7.55505	7.42483	10.0891	9.37494	10.8979	6.57788	5.21698	4.85903	2.93572
	Csa5G167110	2.3e-08	6.59e-07	5.87826	9.54558	5.52984	4.18422	3.84059	9.46224	8.75662	12.4075	6.87697	5.25812	7.46711	14.7369	11.0215	20.8319	5.31739	6.28126	7.47215
	Csa2G356610	3.62e-09	1.25e-07	4.15004	5.36319	9.34229	7.14149	13.517	6.75012	3.5562	7.07052	12.982	8.32054	11.7201	6.22195	4.31688	3.29707	12.6285	16.6134	11.9262
	Csa1G227450	0.0046321	0.026726	8.64959	8.79557	8.41048	16.6118	16.8942	5.32814	4.53005	10.6081	9.52474	9.99043	13.3786	3.3928	3.00442	6.14491	7.10407	5.70496	6.85445
	Csa4G372090	8.78e-15	7.44e-13	7.86379	7.43456	12.4908	14.2349	13.9422	7.28439	5.22089	4.95199	12.8584	10.7249	10.3293	3.14892	5.08598	2.94607	10.7908	8.81391	6.83565
	Csa4G639170	3.96e-06	6.59e-05	8.43605	8.82635	5.89421	7.16774	8.23804	9.00511	9.21385	12.7248	6.02263	5.59033	7.46169	13.0476	10.0337	12.6711	8.56068	6.52528	5.60004
	Csa6G104650	0.00311968	0.0195104	6.36413	8.7209	4.84103	7.35097	5.80724	8.27655	8.40381	8.40512	5.65315	8.22948	7.74117	12.9991	9.06934	18.322	7.08108	6.97079	11.319
	Csa6G007470	1.32e-06	2.53e-05	9.6827	16.0266	8.73419	5.79852	9.90699	10.7312	8.8926	9.12318	7.78392	5.90826	7.40488	7.35017	10.2677	10.566	4.75163	7.05386	5.63151
	Csa2G011510	0.00695632	0.0366639	5.83335	6.3305	7.52116	7.15046	8.44739	9.16491	6.20061	4.1199	12.165	9.24257	7.96964	11.2613	9.34888	7.05742	11.739	10.9834	11.2404
	Csa3G881600	7.68e-09	2.44e-07	4.21803	6.2249	9.34786	8.81035	8.5358	6.35986	6.17154	7.17808	9.72887	10.6766	10.4071	7.72555	7.04388	7.73842	11.4142	10.8133	13.7761
	Csa3G416660	6.97e-29	2.25e-26	5.1206	17.9926	1.7303	1.98546	1.97951	16.7885	22.8884	9.87089	2.30991	2.09265	1.50405	14.3575	17.8405	18.574	3.61206	5.03855	2.49273
	Csa2G000930	0.00638513	0.0344499	4.52883	7.54963	6.37122	4.26335	7.73821	8.77594	10.4994	12.6592	5.59593	3.92472	6.46861	10.0543	10.5727	18.4857	11.8855	9.92909	7.01024
	Csa3G901120	7.19e-06	0.000111574	3.23553	7.02086	4.75423	2.41474	4.22856	9.94131	9.54193	9.23322	5.94283	5.18687	4.18283	11.7454	16.4837	21.5315	11.3524	10.4649	9.195
	Csa7G075660	0.000932371	0.00729261	7.90848	6.26258	6.33455	7.1212	6.23512	10.1682	9.72531	8.82706	8.28488	8.6147	6.93303	10.1289	10.5495	12.8655	7.98621	9.23281	9.4497
	Csa6G506530	0.0103218	0.0492802	4.33148	5.59097	6.65372	5.02947	7.15363	7.72479	7.53889	6.01969	9.92531	8.48568	8.36286	8.58459	12.0232	9.56646	11.7239	15.8483	12.07
	Csa4G091870	1.7e-05	0.000239733	3.06866	7.97658	7.50692	8.44714	10.0796	5.67808	5.89464	11.3356	13.5418	19.318	14.792	2.59992	2.47159	4.89809	7.88908	7.25577	13.881
	Csa6G483490	0.00063949	0.00534844	11.6656	8.14911	7.85959	7.07982	6.20568	8.90577	7.46955	13.7933	6.0746	8.66283	9.13512	10.6492	12.2231	7.40212	6.21055	7.15422	7.99834
	Csa3G178560	0.0061677	0.0335555	8.10291	6.70163	9.4681	8.4578	9.13361	9.56328	6.44762	3.65961	10.7227	9.83049	6.37002	7.87262	8.81789	6.44431	12.2196	12.1482	10.7023
	Csa1G287020	0.00505388	0.0286582	5.38238	7.25282	4.5971	4.70768	6.55608	12.8005	8.05783	8.12276	6.99834	5.26242	7.07475	13.7026	12.2101	11.5152	8.86311	15.7085	7.94455
	Csa1G277460	0.00128532	0.00948891	4.4262	6.2894	5.47415	5.09541	7.47271	7.80578	2.92774	8.87073	12.3151	8.62483	10.6015	7.55881	6.66006	6.84415	13.322	16.6839	15.8294
	Csa6G491020	3.03e-10	1.33e-08	4.60809	7.68683	8.76813	10.2418	10.6634	6.53259	6.98314	5.45107	12.0821	11.6701	8.61738	5.21495	5.7117	6.7285	12.9076	12.7199	10.2602
	Csa2G382710	0.000178358	0.00182073	6.80467	6.7687	7.63419	8.38029	9.68381	8.34551	5.52705	6.43952	9.54101	9.34253	10.3879	8.39715	8.87089	8.85382	10.5123	11.3027	10.2644
	Csa2G277040	0.00301336	0.0189894	5.26959	10.0497	11.6659	8.82007	10.7713	7.20932	7.79397	6.07557	9.43716	9.71733	11.9124	6.47509	7.42878	7.4069	9.83826	8.49111	8.84703
	Csa1G025810	2.6e-06	4.56e-05	1.99689	5.81798	1.24856	2.89205	2.3067	9.44682	9.09061	4.07226	4.11234	6.80376	3.48602	21.7228	21.9187	27.1695	10.1637	8.48523	6.79661
	Csa6G095890	0.00220058	0.01476	11.5552	8.13198	7.79602	9.28614	6.77038	10.0836	9.03681	9.60865	8.04321	8.81218	8.35129	7.99529	10.7034	8.59127	9.21899	6.47363	7.13366
	Csa1G025800	2.76e-07	6.11e-06	3.58532	5.2768	2.45523	1.73085	5.06193	12.0034	10.5789	6.55519	4.16162	5.62991	2.04839	15.7867	22.6726	25.2825	7.29939	8.42779	9.08735
	Csa6G327960	5.04e-06	8.15e-05	2.19457	1.11292	4.8641	2.92704	6.3229	5.82248	2.74504	8.172	9.52237	8.63255	13.8989	7.60275	9.27089	3.54816	10.126	26.6976	24.2101
	Csa3G689280	1.11e-08	3.4e-07	0.757759	0.417272	4.0949	2.86149	6.15158	9.30205	3.20118	6.34994	14.6168	13.2945	11.4646	8.63569	6.3726	3.29255	11.3133	24.7848	20.8752
	Csa6G505870	0.00932498	0.0456764	6.57634	6.92405	6.92098	7.6985	6.83979	8.38884	5.36667	6.34178	10.5817	9.68751	9.0313	10.778	9.03853	8.74888	13.6845	10.3771	10.8614
	Csa6G108560	3.99e-05	0.000502699	5.18591	4.26452	7.05801	9.09807	9.80296	6.18157	6.26964	8.20119	13.3853	9.08903	9.37506	9.89698	7.22722	7.93769	9.59755	13.562	11.7505
	Csa5G571520	0.00647429	0.0348064	10.06	8.71718	7.11795	8.09731	6.29763	8.43385	10.8252	7.96522	8.59962	6.80463	6.49461	12.554	10.1934	8.55299	10.0625	5.7574	11.4535
	Csa6G093100	0.00232842	0.0154574	8.56266	9.5772	9.63143	8.67174	8.74483	9.01851	6.68216	10.9396	6.96676	7.93722	8.65026	10.8553	9.23317	12.6278	6.50827	6.74731	6.765
	Csa7G414430	0.000306156	0.00287874	10.7704	10.2463	7.46153	9.62955	8.25535	9.15439	8.75607	11.5587	8.06339	6.94495	8.71049	11.1766	6.89995	9.84208	8.45706	5.74325	6.76245
	Csa6G003410	0.00373741	0.0224398	10.2977	8.52455	7.78296	5.98521	5.96727	14.2145	11.6272	7.6154	10.4589	5.97451	7.65696	9.11948	10.645	8.6976	7.1038	12.3793	4.89475
	Csa2G008040	0.00091004	0.00714138	7.15017	9.79062	13.1091	9.96873	12.5406	7.46528	5.4002	3.30711	10.5655	8.09588	8.93058	8.61062	8.68763	5.4331	12.7679	9.09015	8.04449
	Csa6G190360	0.00473396	0.0271903	8.73835	9.24071	8.12093	7.98026	7.69111	9.19041	6.73564	8.39539	9.11239	8.18988	7.66624	10.2621	10.1104	11.4472	9.40693	8.63494	8.11362
	Csa4G102300	0.00108666	0.0082688	10.5387	11.8459	5.97794	11.6544	10.0088	9.00255	7.85864	15.3795	10.4712	4.46143	9.44537	9.28627	9.86788	11.0152	5.24643	4.64609	2.33675
	Csa2G238780	9.6e-08	2.39e-06	5.61982	5.57036	7.33207	10.225	9.21877	9.07212	6.87744	8.65855	13.0911	13.0609	10.9525	7.7057	5.32938	6.53836	10.0581	10.0784	9.74228
	Csa5G160150	0.000857714	0.0067979	11.0009	12.5375	8.83961	9.83895	12.7334	7.32749	9.62336	12.8677	5.88847	7.01083	8.11724	5.60142	9.487	12.5575	5.79757	5.44806	4.68317
	Csa1G097720	0.00111205	0.00842494	6.62833	7.20139	8.37332	9.80079	8.22183	9.69657	5.57195	6.81185	11.1471	8.98867	8.58375	8.78716	8.35834	8.1457	13.0489	10.0847	9.93608
	Csa1G003500	0.000399999	0.00358945	6.45813	8.92574	13.1376	9.75714	12.7137	6.55393	5.56712	7.80994	9.10373	9.69362	9.43214	5.88645	4.8192	8.34375	11.5538	8.23179	11.412
	Csa3G629740	0.00224445	0.0150015	1.45654	10.106	17.2833	4.64083	33.2189	9.21661	5.29891	3.44502	12.3212	7.50377	13.4373	1.09445	2.9075	2.54235	3.64613	8.96972	12.3166
	Csa1G616330	6.34e-66	1.21e-62	12.7346	10.8038	4.62819	4.15932	3.27688	14.4378	14.4251	11.6936	2.91017	3.72185	4.04463	16.0511	16.7306	15.8662	4.39862	4.739	4.94123
	Csa3G848260	0.00250977	0.0164013	9.52097	8.36978	7.89357	9.78516	8.52503	9.8325	7.98905	7.49697	9.14535	7.82137	7.78829	10.561	10.2947	10.3981	8.48749	7.90467	8.0064
	Csa4G109540	6.84e-08	1.76e-06	2.29072	13.5821	5.77002	1.2828	5.60095	20.0065	14.0588	12.9029	3.39656	1.18091	1.65775	23.2918	22.562	16.1668	2.92938	1.8225	1.74181
	Csa4G279810	8.96e-06	0.000135716	3.86082	5.38507	10.1309	3.53573	8.49457	7.13507	8.70417	4.80158	10.9979	9.69687	11.139	4.57306	5.49941	4.88873	15.2896	19.037	17.265
	Csa4G011730	4.81e-06	7.82e-05	7.41431	7.81484	6.59226	4.85225	5.83289	12.7599	8.95761	5.84625	7.93549	7.14696	7.19175	14.4085	13.6342	14.8728	8.16696	10.0997	7.01875
	Csa1G015610	1.22e-05	0.000177555	4.412	7.41537	8.56221	5.55899	8.56014	6.31849	6.02277	6.93161	9.51486	9.5383	9.58701	7.89679	7.52617	8.04401	14.5563	15.725	14.7349
	Csa4G630550	0.000834016	0.00664321	9.65532	9.149	7.7266	8.86799	8.39129	9.00614	7.77118	11.6258	8.62887	7.06525	7.95072	9.45385	10.7354	10.5837	9.81708	8.00184	6.49408
	Csa6G079190	3.57e-08	9.73e-07	4.69582	5.37782	9.57056	9.40171	6.417	6.4012	7.00269	3.71825	9.48749	12.5326	7.61048	7.74834	7.68472	8.88458	15.2548	15.2721	14.179
	Csa6G157080	0.00613898	0.0334469	11.3765	8.89296	10.3649	9.96818	9.47286	8.38344	8.41592	8.82005	6.83685	8.26637	10.5349	12.8177	9.58916	10.0113	6.24275	5.68268	5.83906
	Csa2G251510	0.000302953	0.00285144	11.036	12.6176	10.1723	9.05183	9.9503	7.31536	9.42345	8.81133	7.39195	6.27636	8.26901	8.87237	9.00864	10.4187	7.28375	7.98695	7.67046
	Csa4G015720	0.00163421	0.0115375	6.76749	10.1292	7.77089	7.04322	7.54013	10.2159	8.39288	10.3751	8.16058	7.46699	9.59368	10.9183	10.3443	11.1796	7.36106	9.54131	8.80081
	Csa5G603340	0.000964946	0.00751043	13.0843	9.41166	10.5793	9.9881	7.45658	9.16581	8.93169	16.1832	7.01707	6.66288	7.5663	8.54298	8.44925	8.02786	6.05697	7.77128	6.78569
	Csa4G050850	6.09e-06	9.64e-05	3.38213	7.1725	9.23505	6.64113	6.37136	8.35926	4.74104	3.87863	13.6062	13.4962	7.90897	8.40348	8.377	7.06308	14.6972	14.6666	13.9564
	Csa3G252490	0.000117126	0.00128087	3.87122	1.83815	9.63432	3.05286	11.1684	6.93159	5.99755	6.91245	10.9702	10.5162	14.3984	6.25537	8.49692	7.4312	5.96197	17.9356	20.6354
	Csa4G218340	4.51e-05	0.000559616	11.6849	10.0798	13.4984	13.7602	14.9614	4.16857	6.16601	10.4946	9.90734	15.4876	16.7456	1.85062	2.9075	1.60507	4.72179	5.98049	8.06177
	Csa5G154780	0.00614257	0.0334569	5.73651	7.89419	7.85257	8.39948	10.4089	6.75514	6.74	7.98078	9.08388	10.5094	8.25456	7.31052	9.42444	10.2984	12.1317	12.49	10.8806
	Csa7G392420	0.00683699	0.036185	6.51492	7.90425	7.39874	9.36802	9.29513	9.27158	6.04154	3.85324	12.4932	10.4645	7.77665	10.2795	9.65164	7.35276	12.9011	11.4225	10.2109
	Csa5G600390	5.06e-17	5.84e-15	5.03471	7.32855	9.16713	10.1335	10.1404	5.91927	6.43195	5.84174	13.3556	14.6298	12.7228	6.36252	4.64439	4.75944	12.0859	10.8194	12.9152
	Csa6G362950	1.51e-08	4.5e-07	2.77877	3.99142	6.15463	4.70199	7.20639	8.42732	5.76518	4.5084	13.9959	11.2818	11.4943	9.23007	9.21743	9.45918	11.693	18.5716	13.9284
	Csa3G873280	0.00457637	0.0264766	6.78554	8.32031	7.28491	9.38116	8.31553	9.02676	6.18401	4.29294	11.6189	10.9809	7.88861	9.17823	9.12374	8.71247	11.2529	12.362	11.8299
	Csa6G077420	0.00778567	0.0399314	6.18675	7.67707	7.60999	7.87488	12.502	9.92502	6.56932	11.6718	9.92033	13.0674	10.6849	5.07461	4.23838	6.74904	7.58533	12.1176	13.0919
	Csa6G518210	2.08e-06	3.73e-05	5.89443	5.17366	7.71298	8.23493	6.03737	8.31895	4.77648	6.02431	11.4355	8.50994	9.57841	10.8128	9.29209	8.39106	14.1827	15.3398	12.8686
	Csa3G750890	3.57e-05	0.000455651	4.59426	6.83073	9.24049	7.74967	7.89813	6.10136	9.17246	7.99603	11.1866	10.4634	9.85082	7.68867	6.25332	6.31496	16.0858	15.0508	10.1719
	Csa1G246610	1.2e-11	6.62e-10	9.93646	9.84901	6.79381	5.82059	5.15232	9.04169	11.9218	16.759	3.03779	3.80588	4.34552	9.81881	13.8452	25.915	5.26924	6.01059	5.38564
	Csa4G101790	3.87e-06	6.5e-05	11.0339	10.5585	9.45549	8.3353	8.85495	10.0425	10.5399	7.70078	8.89781	7.75436	8.35947	8.63069	10.4235	10.2216	7.38525	7.09545	7.49417
	Csa6G499210	3.32e-06	5.64e-05	13.1753	9.93899	8.51561	9.72088	9.07443	10.5481	10.5961	8.50043	7.82773	8.53079	8.73204	8.30479	10.0436	8.46248	6.9359	6.89929	7.15167
	Csa5G139900	2.71e-12	1.61e-10	4.61077	5.54951	7.64848	7.63162	8.08429	7.51452	6.52467	5.73197	9.80358	11.1236	8.87495	9.61474	8.67597	7.71886	14.0492	14.8877	15.2401
	Csa3G130890	0.00802456	0.0408463	4.27334	6.20967	7.25604	6.03677	7.0291	8.9682	5.04011	6.59506	10.8681	9.97876	11.1249	10.8918	9.15148	12.0583	10.0609	14.6062	13.1372
	Csa1G423280	0.000360059	0.00328074	7.21448	8.38006	5.83325	6.46505	7.48016	10.6944	8.9552	6.32178	7.56794	9.44165	5.11651	13.5349	13.0419	15.8916	9.70356	9.64114	8.17147
	Csa2G002530	0.00341669	0.0209293	8.50009	8.88182	8.72193	6.73742	6.82806	9.95623	8.8338	6.58316	8.84728	8.4744	6.79808	11.0947	11.5225	11.907	10.8132	9.93163	9.05589
	Csa1G533380	2.48e-27	7.28e-25	7.68625	6.95474	4.29306	3.31953	3.7486	11.3751	11.0318	9.73242	6.10823	5.76873	3.87509	16.0444	18.4494	17.0607	10.245	9.32501	8.53631
	Csa3G848250	0.0072717	0.037876	9.86927	7.08206	10.505	10.4546	10.8859	9.38274	7.00712	5.78527	11.4643	10.9309	7.29542	6.93546	8.69819	7.49463	8.95745	12.1409	9.42795
	Csa5G118190	3.63e-05	0.000462083	6.543	8.59951	7.93498	9.48574	9.422	7.44386	6.94321	5.4264	10.2534	9.68808	8.7267	9.19646	8.05962	8.93503	11.6848	14.6933	11.3887
	Csa5G154820	0.00139007	0.0101278	1.61592	5.20552	5.55696	2.14527	9.83867	1.94054	8.42909	3.51551	8.48584	9.67691	5.71242	4.68611	5.24169	1.75534	22.4765	14.4633	43.6851
	Csa2G369750	0.00870592	0.0434476	8.76825	8.87521	9.5095	10.3976	9.65831	9.86042	4.30675	5.15153	12.2344	11.1338	8.63934	9.54953	9.05895	5.97316	11.9348	9.81002	9.72232
	Csa6G011670	2.41e-07	5.42e-06	5.41977	6.57556	9.69935	8.69034	9.14873	9.27678	7.21259	3.83845	13.5023	10.4947	8.45999	7.778	7.03984	6.59252	14.039	14.7174	12.195
	Csa4G292460	0.00107416	0.0081978	5.93744	8.74727	10.5504	8.28018	9.59303	8.95067	6.1587	3.39223	12.8666	9.96925	7.27764	8.13127	8.95666	7.73705	12.0869	16.0093	10.1135
	Csa5G611690	0.001381	0.0100898	8.48087	8.68149	10.4527	10.9131	10.7899	7.92703	5.96286	4.85818	12.0629	8.45894	8.54752	7.92962	7.53005	10.5198	10.9661	11.3235	9.57207
	Csa2G382580	2.61e-11	1.36e-09	6.27334	10.2089	3.49588	3.13247	4.70941	14.1676	12.7638	7.82211	6.76809	6.40815	5.19788	14.1195	13.8699	16.7709	10.0257	10.0101	9.28596
	Csa4G049050	0.00305947	0.0192046	8.0214	8.25197	11.3443	12.0044	14.2206	7.95435	8.34019	9.44819	14.4166	9.56562	8.33824	5.19402	4.46802	6.21973	7.39991	7.1312	12.7795
	Csa2G373480	1.25e-14	1.05e-12	7.31668	10.8567	5.68226	3.44336	4.59285	8.41822	12.0262	16.4706	5.52185	5.22599	4.63496	14.2836	17.2437	18.3179	9.01459	5.83858	6.28209
	Csa4G016450	8.01e-17	8.93e-15	4.77024	8.39568	2.91431	2.27335	3.27028	11.7141	10.2084	8.33779	5.36525	4.36495	2.72246	18.6314	18.3832	28.6993	8.41025	10.9781	5.80948
	Csa2G007390	0.00301097	0.0189806	9.10219	9.02208	8.1119	6.7534	6.2173	8.86772	8.48836	8.59771	8.04706	8.24754	8.11057	10.4567	10.4795	13.3938	11.2239	9.76609	10.6003
	Csa3G119700	0.00875094	0.0436038	3.68284	8.08553	8.15015	7.01865	4.81085	16.8227	5.55376	4.51279	14.0771	12.5858	9.62581	7.9431	3.08893	3.48962	13.9469	15.0611	17.7667
	Csa5G202360	1.41e-11	7.7e-10	12.3882	12.1132	10.1981	6.93416	8.27241	11.1911	10.7118	8.41717	6.89511	6.49252	6.19566	10.8338	12.3088	10.9919	7.26388	7.93589	7.1345
	Csa3G776890	2.58e-06	4.53e-05	13.5052	11.1394	11.4686	10.9625	8.93782	11.6714	10.3546	7.863	6.91335	8.58276	8.33595	9.80591	9.96112	8.28999	5.97474	6.47564	6.28197
	Csa3G454120	0.000372981	0.00338486	6.85563	7.46212	7.93201	9.42467	11.4996	7.69424	6.26836	7.39697	11.5981	10.4927	10.3686	9.07508	6.13108	10.3935	10.9297	11.3738	11.7133
	Csa2G287090	1.64e-06	3.05e-05	8.40805	9.01021	7.06102	7.04286	6.61858	12.0403	8.415	7.9335	9.80113	7.988	6.09835	12.8622	11.6986	14.874	9.75909	8.81934	8.3406
	Csa2G368920	0.00973971	0.0471866	7.81431	7.1635	8.0329	9.42671	7.34178	9.81805	6.84858	6.15815	11.4415	9.45081	9.0839	10.0655	9.71914	8.00331	13.9407	10.489	12.0628
	Csa1G103270	0.000886355	0.00699872	14.9037	12.6046	11.6656	11.6808	9.79301	13.8454	12.1982	5.69171	8.80231	7.51487	4.05811	10.11	8.95265	6.39588	7.57669	5.96597	5.11471
	Csa1G050370	0.00138295	0.0101001	10.1101	10.5744	8.11608	11.7708	11.0432	11.2411	9.47903	9.25135	8.9456	8.65309	8.96951	9.34626	8.27635	11.3789	6.61236	6.56557	6.57372
	Csa4G038710	1.75e-08	5.15e-07	7.24066	7.86278	8.32825	13.0443	11.0949	7.68622	5.91247	6.36548	12.6109	12.0807	11.5185	7.99623	5.13029	7.44482	11.6739	11.6491	9.36041
	Csa6G091870	0.000193339	0.00195689	3.88632	3.12701	4.17784	2.865	2.22703	11.0362	6.91108	12.3607	8.53067	7.4653	7.27931	19.5397	21.6533	14.7895	10.0793	12.7316	8.63181
	Csa6G008570	2.64e-05	0.000351575	7.47687	7.98809	9.95595	9.87307	11.3267	8.80411	7.91206	5.44585	11.5539	8.57307	8.8986	7.44136	8.08445	7.43033	12.9479	13.5508	10.1078
	Csa3G740270	0.00294692	0.0186384	11.0509	11.7741	9.9429	10.7258	13.8053	11.059	8.82777	9.29252	7.90132	9.52987	8.51872	8.8946	8.74907	8.37256	6.30007	7.2444	5.39059
	Csa6G524660	0.00260031	0.0168887	7.99523	6.94407	7.91395	8.86983	7.18775	9.24489	8.31355	4.86803	14.1584	9.32627	7.93918	8.50593	7.14705	5.52252	17.8665	13.1471	12.6511
	Csa3G132020	0.00184152	0.0127094	4.42501	8.9835	9.74312	8.21026	13.3793	9.79557	8.75079	5.93847	12.7798	10.9984	7.31533	6.50976	8.30097	5.9715	12.7044	11.6114	12.4221
	Csa1G505910	0.00732811	0.0380824	7.63084	7.51391	6.28909	6.53157	7.33595	11.6959	7.12292	11.883	8.68446	8.34427	10.3591	13.302	11.4536	11.9006	6.98291	10.9839	9.95776
	Csa3G184590	6.58e-17	7.56e-15	12.5664	13.9336	8.68471	6.59778	5.56311	8.82428	10.7645	10.7502	5.92143	5.10194	6.32095	12.0065	15.6986	15.5272	8.27279	5.50727	6.19276
	Csa5G148830	2.4e-12	1.45e-10	1.63634	2.76917	5.29387	4.95941	7.98732	3.5467	5.40358	4.26036	9.91227	11.9795	16.2617	7.94342	11.1769	5.85765	13.7841	25.6803	20.1723
	Csa5G603290	2.18e-07	4.96e-06	5.82477	6.95445	4.29229	3.79615	4.20529	9.75045	8.34782	8.96005	7.85152	6.81668	5.86996	18.966	12.0713	19.7702	12.9704	12.2437	10.3871
	Csa3G194380	0.00104478	0.00803343	7.05095	6.81633	9.32263	10.1928	8.9179	9.51276	3.69311	4.67135	14.2785	10.6811	9.30014	11.2136	10.3535	6.2199	15.8317	9.95555	11.1554
	Csa5G289590	3.75e-31	1.35e-28	10.5828	12.3778	5.23681	4.82284	4.25827	12.2928	10.2064	9.77866	6.2291	6.24578	5.19977	13.8618	14.5843	19.5825	7.81701	8.05609	8.04693
	Csa6G198260	0.00221061	0.0148117	7.31871	7.71555	9.14451	10.2891	10.1686	9.39858	5.80615	3.97595	11.1864	10.3818	9.3497	10.7444	9.37719	9.39519	13.3674	10.6021	10.9691
	Csa2G123570	0.000216952	0.00216509	6.076	8.57492	9.04013	8.48126	9.12985	8.02625	6.78824	7.38565	10.7967	9.39177	9.21295	10.0687	9.57305	9.19144	13.1516	12.4305	11.9619
	Csa1G073790	4.88e-05	0.000599704	14.1619	11.286	11.4656	11.4311	9.80727	10.4762	9.19302	10.1221	8.43442	6.92313	8.9892	9.61447	8.42199	8.25939	8.05774	7.01384	5.92263
	Csa6G511000	0.000276646	0.0026536	10.3004	8.91974	7.92839	9.08358	8.74134	8.03805	8.72439	8.49982	8.08677	6.36246	7.63412	13.8486	11.9014	12.4234	10.6179	8.61661	10.3528
	Csa4G626100	7.73e-05	0.000895848	10.1233	9.81118	8.62029	7.88452	8.42662	10.6711	9.41377	9.95143	9.20768	7.56069	8.83621	9.88871	11.9189	12.2729	6.55335	9.95572	9.07207
	Csa4G420180	0.000135706	0.00144974	12.5237	11.5819	7.83043	8.71884	8.12164	9.28276	9.94664	9.17755	8.29257	8.31925	8.4104	9.14585	9.52429	13.3077	9.62429	8.99843	7.44634
	Csa1G056980	0.00029941	0.00282926	14.1346	11.2246	10.9235	12.905	9.234	9.92638	9.42827	10.5979	8.27294	5.85919	11.645	10.6481	11.3954	8.89924	5.46665	4.85004	4.88898
	Csa7G370750	4.79e-17	5.64e-15	2.90142	4.27274	10.67	6.9554	10.3579	2.58832	2.99809	3.65505	10.7552	9.48285	18.5816	5.66838	3.76463	6.88382	15.7512	26.2164	18.82
	Csa3G824880	0.0087142	0.0434662	6.11431	9.68201	7.3629	4.27642	7.4613	11.6407	11.0981	8.86799	8.01566	7.21738	8.70834	12.4278	9.91674	14.5437	10.2541	13.1254	9.62237
	Csa5G172930	0.000114765	0.00125701	7.21046	7.96503	9.55987	7.79641	9.6128	7.56354	8.13663	7.13147	10.7342	10.5534	9.37236	9.44069	7.70245	9.14325	12.1975	14.4712	12.2487
	Csa2G372790	8.09e-10	3.27e-08	6.28723	7.57329	14.0585	9.31254	16.6138	7.07625	5.47744	5.33225	12.7678	9.31714	10.2473	4.88846	4.49653	4.42382	8.7755	20.216	13.9975
	Csa5G167040	0.00260536	0.0169158	7.6492	9.10736	9.29861	10.1245	10.2401	10.4547	7.88155	7.51603	10.7288	10.7352	9.21504	9.00338	8.37012	7.76299	11.1888	11.582	10.1829
	Csa1G006300	0.000134147	0.00143388	5.84324	5.91082	9.00504	7.9912	7.37393	6.7287	6.829	8.82312	11.6708	9.82168	11.1509	12.3638	9.08763	7.92217	12.3941	13.9307	14.2031
	Csa5G154750	0.00306388	0.0192188	7.94353	7.36289	7.42512	6.11082	7.00183	11.4987	9.27761	9.167	7.74606	9.78157	7.87058	10.0139	13.2782	15.2988	9.78123	10.4192	11.236
	Csa3G881760	6.61e-05	0.000783502	3.57044	7.8364	10.5243	7.42161	8.07448	10.4742	7.49708	7.27943	11.6281	11.7193	9.26938	5.57412	5.90117	7.60925	14.0287	17.0946	15.9375
	Csa5G550230	0.000718273	0.00589107	3.50738	6.32394	8.43482	5.17964	8.22366	10.1288	8.58048	5.92997	11.7425	9.34051	9.13189	7.68836	8.63221	9.40202	14.1491	19.0848	16.1649
	Csa3G852460	8.86e-10	3.54e-08	4.49697	9.17193	3.35631	3.30653	3.61711	12.4104	11.3879	10.3353	8.17455	8.7512	6.6578	16.6841	15.8495	18.0785	7.58045	11.6536	10.23
	Csa6G421620	3.36e-09	1.18e-07	6.02415	6.41493	9.91826	9.68357	9.48213	7.13657	5.51094	6.42305	11.8192	9.2328	11.9803	11.5803	7.43792	7.07451	15.639	14.9776	11.7699
	Csa4G652820	1.88e-07	4.35e-06	7.48816	6.24204	9.54123	8.03726	12.1878	10.2317	6.72323	6.78498	14.1894	10.1411	12.4995	7.78637	6.32283	6.59171	12.1107	14.2361	11.0974
	Csa7G429530	0.0031464	0.0196203	7.69421	7.58137	7.64932	6.43106	6.74923	8.69315	9.49945	9.29732	9.05711	6.54344	7.01006	14.9541	11.3716	14.7269	13.5256	11.3646	10.4449
	Csa4G296200	0.00686531	0.0363147	10.6192	10.8872	10.0756	10.3587	9.65198	10.2348	9.38272	15.0713	7.03937	8.15454	10.3591	11.13	7.78619	9.02154	9.13825	7.56935	6.20822
	Csa5G160140	0.000435369	0.00385783	7.44955	8.02607	5.46308	4.58663	5.7161	6.74197	10.6127	12.4018	7.3372	7.91687	8.53797	22.0813	11.4403	13.0832	11.2771	8.4286	11.6749
	Csa5G472110	2.66e-12	1.58e-10	4.34115	10.2579	19.0417	13.4613	22.0809	5.91143	3.81005	6.11636	10.4886	11.5963	13.56	2.79233	4.14908	2.47013	10.0502	9.02001	13.8479
	Csa3G865350	0.00711822	0.037311	9.10322	11.0513	8.35141	7.80147	7.2225	8.25409	9.68249	9.55791	6.77483	9.84936	9.06789	10.5068	11.8002	12.9442	9.55624	10.1228	11.4415
	Csa3G171130	0.00206659	0.0139793	10.1746	10.4212	9.33043	10.0857	7.90071	9.48389	9.57005	13.1547	7.84249	6.96346	9.13473	10.2346	10.3727	11.6021	10.63	9.68495	7.06287
	Csa5G639480	2.41e-12	1.45e-10	16.8629	24.1856	7.91935	6.71976	11.2437	18.4996	29.7702	14.5228	5.57446	5.56742	7.46276	3.35894	4.25343	2.5234	2.51237	1.58674	1.18331
	Csa2G193350	3.34e-06	5.66e-05	6.3739	5.49135	11.0506	9.34747	15.6174	8.63339	4.0207	6.34216	14.7212	9.81878	14.2841	10.1131	6.75161	6.76283	8.50004	14.5204	11.4241
	Csa2G000270	0.00023806	0.0023424	6.64494	7.48271	10.0413	8.82173	9.37421	9.7475	6.59111	8.56404	10.679	9.84805	10.9248	11.3746	6.91206	7.67511	13.5098	13.4468	12.6637
	Csa6G499110	0.000252415	0.00245702	11.1846	10.3136	10.1852	10.8855	9.11972	10.8107	10.8779	7.05395	8.86022	8.80163	7.3475	13.6569	12.0514	13.6219	8.42752	5.23213	5.91383
	Csa5G602170	3.48e-06	5.88e-05	7.82409	7.49843	10.6912	9.52042	9.30898	8.23433	5.83009	3.66737	11.3749	9.52414	7.99622	8.35141	10.2527	7.65487	17.0978	16.6442	12.9811
	Csa3G207340	6.64e-16	6.66e-14	11.8906	13.0455	6.95625	5.78409	4.70951	10.6822	13.7201	17.7986	3.7011	4.34849	5.13395	20.7253	14.0345	22.2615	3.62082	1.7151	4.33826
	Csa5G577390	7.29e-06	0.000112865	1.99689	6.65769	10.5236	3.27765	9.9957	5.23208	5.89206	8.0041	18.1691	12.0693	11.2186	4.21157	2.74802	3.68103	12.387	28.1637	20.3898
	Csa2G359980	0.00401233	0.0237399	15.7044	10.7368	11.3268	15.5241	9.39706	9.92588	9.27853	16.4045	7.09534	9.22962	12.5306	9.4019	8.98415	6.09074	5.57141	4.06673	3.37871
	Csa3G063640	0.00382043	0.0228447	10.7522	9.8504	10.5052	12.1723	11.6887	8.98238	7.31388	6.26409	9.87574	10.9844	10.9147	7.69685	8.80505	8.82408	10.5591	10.5281	8.99152
	Csa5G152850	0.00050205	0.00434177	6.14963	9.10823	9.83891	7.75753	11.2022	8.68659	7.99702	7.19005	10.6264	9.00734	11.7474	6.53076	9.0951	8.09931	12.4167	16.4494	12.838
	Csa4G643620	0.000295374	0.00279666	3.91924	6.55188	5.0865	4.19357	5.60563	11.2747	6.59085	8.4162	7.58931	6.09098	5.4531	16.178	17.9629	23.2144	11.7595	13.0601	11.9172
	Csa3G124900	1.32e-12	8.24e-11	12.6398	14.6969	6.48816	11.316	11.1963	13.6708	15.5909	14.9479	6.90797	6.85239	6.49237	9.29976	11.4329	11.0703	3.3172	4.06922	4.88912
	Csa6G182110	0.00107038	0.00818405	7.00038	7.13797	8.0958	9.87169	8.81354	10.1363	5.358	6.74283	13.4921	11.0361	10.2268	12.2899	9.76033	8.08546	13.3262	12.7246	10.906
	Csa6G190370	0.000428554	0.00380629	9.16287	8.17401	7.44783	6.17073	4.69686	12.7542	10.6214	7.75625	10.9874	9.34551	9.61932	14.8244	11.979	14.6185	9.92492	6.62726	10.5753
	Csa4G001820	0.000142391	0.00150513	10.2624	12.1746	7.96276	7.72951	10.4777	13.0959	9.87862	9.56317	8.53872	9.11333	8.9937	9.50317	10.6495	10.2638	8.6763	8.58484	9.90311
	Csa1G004250	0.00110464	0.00837548	4.58404	6.56628	5.87354	8.6688	7.28856	10.3886	3.43808	3.81822	12.8908	10.5935	10.5061	14.581	10.1928	7.687	18.6754	15.7487	14.1313
	Csa3G124790	1.82e-13	1.26e-11	13.7582	10.9364	5.45346	3.82275	5.44978	11.4725	8.26653	18.4615	5.52811	5.92001	5.84889	30.4359	15.7128	10.0041	4.48471	4.6166	5.74777
	Csa5G184270	0.00826773	0.0418013	9.05312	12.2637	9.40332	9.7524	7.94286	8.64565	10.6341	15.2062	7.88364	7.62901	11.8758	10.1593	10.9075	10.1152	6.78832	9.0462	9.06601
	Csa6G355990	0.00558521	0.0310508	5.6889	8.00665	10.9613	7.19287	8.81418	10.913	7.01121	5.37207	10.9548	9.70359	10.473	11.0661	10.3585	9.39297	13.004	15.6503	11.8884
	Csa6G524600	0.00668004	0.0356412	13.16	16.514	10.17	11.6818	12.9281	11.989	9.759	5.19011	8.22385	8.78906	8.03514	8.89195	11.3087	8.11665	8.30255	7.15628	6.79076
	Csa1G042620	0.00587721	0.0323849	11.5852	12.136	8.65102	11.5531	8.29019	12.7995	9.38636	8.88604	10.9397	11.0409	10.0655	8.42803	10.918	9.16114	7.65551	8.44102	7.25663
	Csa4G645820	8.65e-12	4.85e-10	5.70622	5.80615	12.6024	9.86826	12.8865	7.70151	5.38525	8.84737	15.5366	13.2811	11.4248	6.9675	6.0061	7.26516	12.4045	15.4175	10.1369
	Csa2G297760	0.00128265	0.00947287	7.52165	6.6105	7.93227	10.1188	9.1327	9.33375	8.97466	11.171	13.6311	18.336	10.6622	9.30668	4.93394	6.19757	12.1598	12.3674	8.92757
	Csa4G050180	0.000125336	0.00135875	7.93517	9.76163	8.58695	6.11875	6.42269	11.2001	11.3705	8.60173	8.62293	8.75733	6.30769	15.0514	13.5869	11.1467	11.8903	10.4428	11.6117
	Csa4G642270	0.00944004	0.0461511	10.4142	9.75592	10.7452	12.8821	10.5537	10.5065	7.26041	6.34458	11.3939	11.2756	9.71064	9.55987	7.4174	8.32781	12.0544	10.0356	9.38478
	Csa2G356090	0.000359137	0.00328024	10.5029	7.51251	8.77272	10.1994	8.78759	9.39888	13.7024	12.8389	6.91959	8.90554	7.70316	11.067	11.3807	15.5054	7.7203	9.08082	7.63199
	Csa2G034590	0.000780186	0.00628532	10.2227	8.75095	12.6174	12.6742	10.1984	9.99348	6.60065	5.31797	12.3182	10.3046	10.3978	9.28432	9.20352	6.44458	13.4364	9.59929	10.3221
	Csa3G893370	1.25e-35	6.13e-33	5.38966	8.05966	3.15284	3.17644	2.47415	12.9822	13.8963	15.146	6.96756	6.21379	4.89479	21.5689	18.0556	22.1703	7.48934	8.33437	7.85458
	Csa3G734980	3e-17	3.6e-15	12.7065	12.4842	8.5695	7.13234	8.82231	11.1432	14.5999	11.4778	7.36821	7.76458	7.82211	12.2828	12.4435	12.9419	6.28916	6.734	7.35833
	Csa1G046910	0.00507042	0.0287248	8.43347	9.09394	9.22487	12.4557	12.3137	10.9386	5.57529	4.14728	14.2469	12.6098	8.10888	9.49308	10.0271	7.50702	12.8129	11.0736	10.1164
	Csa3G873260	0.000825502	0.00659468	9.09733	14.3977	3.50625	7.41999	10.9636	8.45018	10.4405	17.0872	4.84414	7.81347	7.10716	10.0035	18.4776	11.3564	7.17574	7.19785	12.9122
	Csa5G635360	2.59e-06	4.54e-05	8.22549	8.18769	10.2881	14.3459	12.3195	9.89186	5.82606	4.80574	14.4044	12.4102	9.554	8.70827	8.31523	6.2236	14.5217	10.7373	9.56436
	Csa7G420840	5.8e-05	0.000698379	4.80393	7.1275	7.62925	9.56244	8.9579	9.107	4.31478	4.87284	13.477	12.8794	8.82938	13.7237	9.04919	8.89792	18.4593	13.0405	13.6102
	Csa2G369000	0.00247333	0.0162242	1.97597	3.36284	5.42144	3.3657	5.96114	6.08898	6.43065	3.89326	8.52239	8.56609	6.36529	15.2047	13.3433	18.4676	20.1559	17.4634	24.3232
	Csa5G576690	0.000583158	0.00493356	3.99971	3.32161	8.497	5.97012	10.9887	7.01007	5.21276	14.8005	15.6278	8.24389	14.4932	8.84362	8.41568	4.48832	12.4828	22.4687	14.5959
	Csa6G519530	2.18e-07	4.96e-06	12.5837	11.126	8.91917	9.5834	8.14449	10.3791	9.62787	11.3842	7.01877	8.26418	9.56521	17.6551	12.1075	10.786	8.1314	6.9465	7.43685
	Csa1G050250	0.000823595	0.0065822	6.90326	8.21583	11.4637	7.64154	14.1562	8.66952	7.21314	9.30717	11.0527	10.6232	9.5476	8.36978	7.88475	7.20549	10.7681	18.2269	12.431
	Csa3G751450	6.13e-05	0.00073035	15.1226	11.467	10.5991	11.3232	9.0741	11.3504	9.91015	6.90169	9.71666	7.41743	6.96958	10.9253	12.0729	12.1684	9.63096	8.97354	6.20394
	Csa6G054850	0.00545812	0.0304508	8.2296	7.91725	8.29399	9.76869	9.64329	9.95549	6.00429	7.4073	11.3276	10.2944	11.6623	11.6372	10.5668	9.17337	14.4515	11.0428	12.7979
	Csa4G064060	3.58e-07	7.71e-06	13.8975	10.3314	8.67784	8.89747	7.59862	14.4667	10.5992	11.8302	7.90398	8.98444	10.2033	12.7667	10.8137	10.0958	5.99927	9.84913	7.72096
	Csa6G087690	4.8e-06	7.81e-05	4.93028	6.00451	8.01571	5.18934	10.2773	9.55809	6.06871	5.87448	15.1343	13.402	14.9598	10.3664	8.67768	10.0549	13.5541	16.5344	12.0464
	Csa4G046650	0.00328086	0.0202665	12.9825	11.4628	11.2321	11.8589	9.47743	9.6842	7.51934	10.5393	9.69058	6.80144	8.58596	10.6582	10.5401	14.0331	10.3261	7.97578	7.6239
	Csa4G644730	0.00620358	0.0337218	10.5951	11.3097	11.3373	9.56711	9.22048	8.19045	7.08055	13.2391	8.00335	8.55558	10.918	14.0893	12.3373	13.3369	7.70011	8.23323	7.43192
	Csa1G030640	0.00241026	0.015909	14.2216	14.3812	11.2209	10.7561	8.7464	9.66057	9.19179	17.2513	7.89876	8.35681	13.3915	9.47186	7.99927	9.5015	5.80585	5.92878	7.55249
	Csa4G131130	0.00382425	0.0228532	7.65679	9.035	9.89644	11.6172	8.59026	10.5085	7.39629	7.45631	12.3893	10.2043	11.7913	9.62748	8.62394	10.0337	13.2529	10.2889	13.1789
	Csa4G015100	8.82e-08	2.21e-06	0.730594	7.28187	19.0625	7.19902	8.81062	2.58334	2.63475	1.64831	27.7843	15.9529	7.48244	1.13988	2.01879	3.76239	18.9608	30.274	14.3071
	Csa4G303680	0.00394161	0.0234297	1.00055	15.868	15.845	4.31315	7.04238	2.82719	3.38394	1.16094	14.4721	9.2071	8.07588	0.287462	0.827305	0.284152	18.2884	37.9876	30.8029
	Csa6G125250	2.18e-50	2.77e-47	20.6915	25.8955	5.33903	5.38646	4.24209	21.675	15.6508	26.0357	3.18599	2.56265	3.99533	12.3073	9.79247	11.0905	1.61064	1.78015	0.585633
	Csa5G165890	1.88e-48	2.24e-45	9.89006	10.775	5.14569	5.11901	5.10366	11.1753	12.5188	12.5164	5.72348	5.50802	6.03193	18.955	18.59	18.8777	8.41093	8.00964	9.5487
	Csa1G006320	9.55e-07	1.87e-05	9.99251	20.1923	7.06442	6.30196	5.52582	13.2997	13.5143	6.68295	7.59447	6.80296	6.53903	14.8208	12.6227	11.1976	10.5507	8.84192	10.6235
	Csa5G622450	1e-08	3.11e-07	10.7144	12.7865	8.68327	9.31044	9.50893	12.4388	10.6629	11.0811	8.8064	9.6394	9.63005	10.1238	12.2786	13.9471	7.83092	7.86756	6.92637
	Csa1G257350	0.000876881	0.00693252	12.2198	10.6703	9.05841	10.738	9.68526	13.6919	8.8699	6.96268	9.5942	9.56507	9.40911	13.0557	12.7802	11.2373	8.97191	7.99322	8.12627
	Csa3G588470	0.000192177	0.00194616	8.92176	6.76546	13.7643	10.1815	12.533	8.50369	7.37266	11.568	12.0347	10.1726	11.5942	8.02209	6.93792	6.86214	11.2174	14.1353	12.2794
	Csa3G604620	1.86e-50	2.54e-47	16.7509	16.1027	8.01919	6.48059	6.3377	14.8886	13.6596	16.3695	6.53111	5.54786	6.63554	14.0944	15.1285	11.9338	4.77353	5.25661	4.50462
	Csa6G450400	0.000351406	0.00323298	7.696	8.24136	10.1094	10.9025	10.6053	10.9704	5.71385	5.68625	13.316	12.3159	9.84271	9.52782	9.69756	10.7619	13.9728	13.5329	10.3186
	Csa1G531690	1.71e-28	5.25e-26	15.2006	15.0005	8.29003	8.88995	8.11878	15.2789	15.1829	11.4991	7.03301	6.10515	6.99642	10.4045	15.2231	12.4306	6.23874	6.65949	4.76078
	Csa2G006850	0.009477	0.0462274	12.9908	12.2547	10.8635	11.0488	11.1818	9.95041	10.3501	9.09847	10.432	9.32789	9.47289	9.60672	10.4288	9.51503	8.31408	10.4759	8.27657
	Csa2G138200	0.00259623	0.0168737	9.1556	11.1409	12.5062	10.3563	20.1776	8.31317	7.52396	13.0415	9.65733	12.6632	18.4781	4.18089	4.26568	5.17492	7.34517	10.8078	8.89419
	Csa5G420310	0.000717941	0.00589088	8.9633	8.96084	10.5303	11.6283	10.4912	9.53706	7.91876	7.93983	11.0991	11.4774	8.58086	8.47319	9.54577	10.4788	12.6672	13.0739	12.783
	Csa3G000170	2.94e-15	2.72e-13	6.57027	11.1893	4.76065	3.82582	6.39307	15.171	12.7738	16.5125	4.54504	4.73727	4.86252	17.9656	23.4794	17.9057	7.42985	10.9743	5.06203
	Csa1G005570	0.00501434	0.0285088	6.96666	7.79185	9.11127	7.34909	7.92518	11.1926	12.3534	12.562	9.71328	10.6313	8.33253	11.8977	13.0806	16.999	9.43819	11.282	7.93062
	Csa5G623700	0.00250649	0.016391	11.5144	8.45003	13.0103	12.1585	10.3635	7.95079	7.61814	6.34602	10.5338	13.8773	9.48608	10.2742	10.1037	6.13632	13.9935	9.7554	13.0968
	Csa3G730890	2.08e-10	9.45e-09	10.5047	12.2762	9.11074	6.95573	7.55284	11.0186	16.2056	10.6085	7.57158	8.40031	6.69008	15.2019	12.7255	16.1226	6.80708	7.51275	9.4139
	Csa1G630310	1.78e-07	4.16e-06	8.78092	9.81474	7.55242	6.15116	8.16754	12.5321	12.8455	10.9936	9.79461	7.15	6.8212	11.8299	14.5159	17.0605	9.38602	11.4666	10.0457
	Csa1G039150	0.000152339	0.00159328	13.0603	11.8912	8.73596	11.4311	9.80519	11.5629	9.59964	14.3805	9.2165	7.93051	10.1893	13.8174	8.69375	9.3246	8.93176	8.33462	8.03151
	Csa1G031850	4.44e-24	1.02e-21	15.1096	13.9105	4.98212	8.05091	6.8336	11.8711	15.1516	12.7178	4.87312	7.0609	6.92065	17.949	14.7313	15.4797	7.63503	6.21433	5.69165
	Csa1G650630	3.9e-07	8.33e-06	0.493219	1.69227	4.47329	0.967076	4.21827	7.6999	3.41277	7.48364	22.8772	18.5101	20.2274	5.04954	9.51732	11.6863	20.9894	19.092	16.8188
	Csa3G151460	0.0099041	0.0477428	11.1709	7.95984	9.54329	7.74279	8.21837	11.3678	12.8555	8.0164	9.5901	9.47448	9.13981	11.7229	12.8063	13.9271	8.43016	12.2472	11.0965
	Csa5G222990	1.68e-06	3.1e-05	17.3509	12.5883	11.54	11.9867	10.2566	9.60654	13.8935	10.0157	7.93818	7.36046	8.32703	8.25336	13.37	11.7719	8.55387	7.51151	5.86847
	Csa1G039970	5.17e-06	8.33e-05	11.8809	10.1527	14.0585	16.2026	16.8228	9.40905	6.25918	4.46535	12.4124	11.2109	10.4393	6.28959	8.72784	6.51731	11.747	11.3445	8.25364
	Csa3G888580	8.51e-05	0.000970108	12.8438	12.1028	11.4028	12.3564	10.4898	11.2394	10.0412	12.2963	9.67863	9.29146	9.26028	10.4083	9.99526	10.4831	8.94834	7.15984	8.74012
	Csa4G325520	1.65e-39	1.08e-36	0.541862	0.214837	8.89108	9.43813	13.8279	0.650716	1.30647	1.13169	22.9652	13.4565	22.4756	1.85258	0.878842	3.87177	18.3731	32.1712	24.8625
	Csa6G079730	0.00790123	0.0404045	6.57803	7.69493	7.8606	8.49688	8.4714	9.9633	6.70457	8.59509	10.5444	9.61816	10.5523	11.7948	10.3164	12.1883	15.3038	15.3822	17.2069
	Csa2G000110	1.54e-06	2.88e-05	14.0486	12.9502	10.387	12.4214	8.59081	10.6286	13.2884	10.3916	8.24543	9.40881	10.4109	13.8946	11.3547	11.4964	6.74709	5.65839	7.51192
	Csa5G148660	0.0017655	0.0122989	11.9223	10.5328	9.47879	10.1543	9.8799	10.5132	8.62581	12.2295	10.8885	8.89727	9.77306	11.5687	10.9294	13.375	10.2785	9.45099	8.94658
	Csa6G494980	0.000746299	0.00605792	12.3523	10.376	9.60647	9.96159	9.06713	11.6407	9.90162	12.4619	9.02837	9.39553	10.2629	10.7624	12.0205	10.1685	9.31871	11.1184	10.0565
	Csa7G354520	6.6e-19	9.47e-17	8.94267	10.0766	19.8627	18.9645	16.5018	7.48592	7.34744	7.03007	14.1452	13.8128	14.3096	3.80576	3.33861	4.61277	12.0786	7.87957	7.65731
	Csa1G570110	0.000492065	0.00427285	12.6183	11.804	10.8046	9.25728	8.18315	13.3883	12.3594	10.8778	9.9247	10.9498	9.9259	9.56003	9.78071	9.81082	10.6928	9.17229	8.87083
	Csa1G073650	0.000155639	0.00162535	4.8384	5.92425	11.4187	8.06075	8.58909	10.7093	7.69801	7.87056	12.6016	8.81184	10.0861	12.2212	9.95026	10.1224	15.8849	17.1715	16.2104
	Csa1G008550	0.00511144	0.0289143	15.4023	11.9488	11.8242	13.6538	10.0248	10.3827	10.2648	8.86413	8.72911	10.1799	11.1855	10.8327	11.7466	10.3511	9.59351	6.94399	6.28189
	Csa5G608350	0.00170009	0.01191	10.4031	11.3269	9.61757	9.88835	8.79811	11.9189	8.5495	9.32374	10.8292	9.6371	9.46596	13.1473	12.3315	11.3199	11.4944	10.9119	9.41128
	Csa2G367210	0.0037028	0.022267	7.53837	8.201	7.76804	9.66611	9.58845	10.5983	6.90537	9.86672	14.767	13.7969	9.34033	7.46473	10.7354	6.61316	21.1831	12.2968	12.0832
	Csa5G211030	1.87e-06	3.41e-05	6.4247	1.35949	4.04285	8.28018	22.32	1.12696	0.401655	2.17773	14.5391	11.0809	9.45148	3.96647	3.98074	10.0373	33.3433	16.8708	29.0682
	Csa5G154790	1.32e-07	3.17e-06	5.46913	7.79591	9.00723	10.7321	10.0381	7.13077	6.13439	6.22493	17.3772	12.2732	10.6933	11.0664	7.88475	11.3162	17.2786	14.4523	13.7546
	Csa3G732520	0.000407172	0.00364524	6.86392	8.10998	10.727	6.99942	10.2701	9.79579	8.39466	9.26267	13.4593	12.1818	12.6858	11.1748	8.95443	9.98955	12.7141	13.8007	13.2533
	Csa4G269160	5.3e-12	3.08e-10	10.8877	11.7927	8.10943	7.55356	8.04226	12.8113	11.6029	15.3836	8.95063	8.75638	9.24286	14.5808	14.5256	11.7423	8.84864	6.68005	9.12762
	Csa7G448010	0.000160873	0.00166994	6.75854	11.4374	6.96445	7.11968	8.43654	9.63391	9.73239	18.6803	9.43732	7.57492	7.53956	12.8818	15.8631	17.0311	9.74825	11.2569	8.73221
	Csa3G106010	1.73e-58	3e-55	26.5435	26.8882	4.61416	3.93436	3.89168	21.052	19.2861	23.4541	2.70312	2.96594	2.93302	9.43827	14.8864	13.6599	1.6535	0.667191	0.453091
	Csa6G134900	7.95e-07	1.58e-05	3.3159	1.35577	3.13583	7.21953	10.4896	0.447978	1.11468	1.92371	8.4505	9.28023	4.081	2.3787	7.52925	12.3669	55.9993	21.847	28.2301
	Csa6G520440	0.00521102	0.0293644	9.89054	15.9579	10.2577	9.16221	16.0585	11.1516	15.1336	15.62	7.06102	11.443	10.4748	6.50801	10.8725	10.9296	5.94124	5.13665	7.81303
	Csa1G569190	0.00513883	0.0290353	7.49854	8.10387	8.92034	11.7833	9.61348	12.1034	7.0135	4.8648	15.4622	11.7303	9.66154	12.7396	9.88637	9.38923	16.4883	12.4449	12.197
	Csa6G087830	0.00854955	0.0428579	9.48498	9.38269	12.1524	11.2423	11.309	11.9827	8.63746	4.7323	13.1028	12.0742	9.63684	9.21889	11.1993	7.65653	12.2869	13.9794	11.8774
	Csa3G081370	0.00726453	0.0378594	10.5333	10.0551	10.8422	11.0023	12.541	11.1496	7.78399	4.75092	14.4318	11.4895	10.2074	9.66181	10.3488	8.16431	13.0777	13.1833	10.7514
	Csa1G240080	5.12e-06	8.26e-05	12.0316	14.7706	7.20685	9.42215	8.87201	11.7678	9.92065	15.003	9.60056	7.71002	13.4222	12.213	11.2852	18.812	5.69127	6.34312	6.68586
	Csa3G133910	4.06e-23	8.51e-21	4.95789	4.94724	11.0504	11.132	9.83024	6.39342	4.53593	5.94565	16.1581	18.5437	10.8741	8.20713	7.19567	4.78725	21.6918	15.7846	18.9651
	Csa6G087880	4.04e-17	4.78e-15	6.14627	7.15588	9.68147	14.7134	13.1197	7.38097	5.88061	6.56548	15.43	13.2586	13.9997	5.59884	4.95791	6.31153	17.3081	16.0088	17.4859
	Csa3G710210	6.34e-10	2.64e-08	3.44636	5.06894	15.4016	6.84825	19.1882	7.47633	6.49497	5.28871	13.462	10.2173	18.3985	6.92305	7.93365	4.18651	16.3387	16.6948	17.8003
	Csa4G293260	6.89e-09	2.22e-07	13.8657	15.5997	9.50585	8.33389	8.73379	10.8152	11.7833	15.002	7.49216	9.67712	10.7408	10.3979	14.8478	14.1203	7.86291	5.40937	7.19185
	Csa2G232990	2.2e-26	6.09e-24	13.1582	16.1743	8.25038	3.90746	5.86654	13.2546	15.1724	15.5687	7.16662	5.84	6.52848	15.961	17.4099	15.9652	7.1337	7.05946	6.98203
	Csa5G601520	0.00184913	0.0127526	10.6708	11.5896	10.1871	9.04242	10.7783	8.08856	11.6149	16.4206	9.07062	9.65607	8.68	13.2605	10.065	14.9804	8.93766	9.89713	8.72632
	Csa1G085370	0.00361404	0.021892	1.89605	4.40837	5.61181	2.18776	3.66838	7.36491	5.23142	5.21474	14.6063	10.0242	10.8126	13.0048	14.8317	17.7654	20.5921	26.4918	18.0125
	Csa6G112450	0.0100073	0.0481162	10.9698	10.8732	10.0475	8.45168	9.6076	10.2708	9.9658	13.9363	9.83278	10.5071	11.5291	11.8961	10.8962	12.6748	10.1104	11.3532	9.10866
	Csa1G075560	0.00223791	0.0149683	3.89632	8.00324	8.99416	5.70868	7.58046	10.0064	7.07406	6.50897	13.8341	10.1433	10.4487	14.1867	10.913	11.264	18.2828	19.5379	15.846
	Csa2G000460	0.000391174	0.00352519	12.3347	12.9016	12.9451	7.62377	12.6281	12.412	11.5859	13.4948	9.99231	8.01766	8.47044	7.9605	13.4844	13.292	9.56238	8.62974	6.92141
	Csa4G290840	0.00524141	0.0295007	15.4872	13.7848	13.4426	11.986	10.5161	11.8221	10.5943	10.8181	9.88998	9.67596	11.3844	8.86163	9.63066	8.34885	9.04028	9.42769	7.55152
	Csa6G292430	0.00133686	0.00981823	5.11844	7.15539	8.4213	6.89774	9.38246	10.2348	7.99297	9.55265	12.2611	12.3929	11.6329	12.4407	12.4262	11.9594	14.1933	15.7271	14.5974
	Csa1G050280	2.71e-06	4.71e-05	7.53413	10.5876	10.2759	10.8708	12.9114	10.3572	8.20477	7.07396	13.5659	12.8666	11.8632	7.989	9.35224	7.87308	11.9417	14.9114	14.5697
	Csa4G652730	3.46e-09	1.21e-07	3.12612	4.83172	6.58557	5.71179	5.89103	8.30359	4.91351	5.41008	14.5015	12.692	8.01951	10.8691	14.2654	10.5904	22.8606	24.5552	20.1962
	Csa3G151350	0.00679304	0.0360625	7.23271	9.01475	9.14782	9.5344	9.31902	11.6515	6.19823	3.75255	15.9847	12.1691	10.368	12.9001	11.0843	10.4662	15.782	15.1656	13.7245
	Csa6G446400	0.00990862	0.0477502	13.1991	13.7119	11.2852	10.1094	9.87747	9.6018	12.7108	11.6333	11.5261	8.93415	11.8311	10.3053	10.0862	11.9482	11.4578	6.75256	8.64389
	Csa2G033270	1.63e-06	3.04e-05	8.839	8.91453	10.0851	10.0213	11.3835	10.1237	7.64347	6.83295	11.8773	12.0664	10.3461	9.34923	10.6564	9.65498	14.2315	16.6248	15.2351
	Csa7G392290	0.00943508	0.0461511	9.18487	7.88435	8.29043	6.20771	7.81781	12.1383	11.574	14.7364	8.85117	10.0973	10.0348	15.3469	13.3525	12.9849	7.28913	14.1167	14.1255
	Csa7G044870	0.000359177	0.00328024	16.7209	15.0601	11.2902	12.9744	14.1078	10.4067	12.6384	12.9341	8.86808	8.77131	8.83699	6.759	8.95727	12.8647	8.17538	7.09957	7.57214
	Csa7G451320	0.00768617	0.0395416	1.58313	3.50761	4.6207	2.17592	4.58532	10.8478	9.84488	10.4271	17.4903	14.0672	20.3864	8.98304	9.96857	16.0957	12.9043	23.7089	12.8521
	Csa5G611710	8.74e-07	1.72e-05	11.8898	12.6356	9.09282	9.21047	7.4631	14.4807	10.5712	7.78671	10.1287	9.94698	9.19589	13.7882	14.3801	13.2707	10.4066	10.5749	9.575
	Csa1G046070	0.00201515	0.0136946	4.0398	4.60488	2.77848	6.65035	8.55537	6.54931	7.86715	4.68735	11.2313	16.984	10.5786	10.852	15.0699	2.92557	23.3246	14.6642	33.0655
	Csa1G699610	0.0013682	0.0100077	7.80497	9.92321	10.243	9.92973	9.84155	10.6314	7.72378	10.1121	13.7674	13.2666	12.6239	10.4057	9.93023	10.0129	11.5808	14.4818	12.4237
	Csa3G878770	0.000161046	0.00167083	12.2962	9.65841	10.0299	9.99307	9.03504	10.5253	13.4825	12.8913	10.0653	9.07333	9.42335	11.237	14.912	11.649	10.9056	10.434	9.48699
	Csa5G612830	0.00165849	0.0116829	5.95299	5.96765	8.50769	10.8488	10.1358	7.79876	6.74371	8.67326	9.57071	10.0533	10.1325	12.3074	12.6175	15.6113	14.0963	19.4426	16.6916
	Csa2G360840	0.00017028	0.00174761	1.73084	4.41157	5.58775	2.05712	7.15652	10.2938	7.03178	10.8543	20.0628	17.2853	18.4316	8.20211	9.9813	10.2266	13.1082	22.7871	16.2498
	Csa2G361850	0.00521694	0.029389	9.46104	7.48327	8.07517	9.4596	8.03477	10.1222	6.45169	5.9656	13.6505	11.1376	9.86978	13.0926	10.9945	11.6453	17.1751	14.6933	18.1562
	Csa6G504510	0.00802155	0.0408463	11.1515	10.4933	7.88446	9.80308	10.412	10.0438	8.03544	10.8408	10.2412	10.682	11.641	15.1345	14.2167	17.8977	8.58213	10.0411	8.373
	Csa7G041960	5.34e-19	7.84e-17	9.90089	14.6017	7.10439	4.55669	6.9575	18.7355	16.3875	16.4312	7.78513	6.83482	7.32222	13.8478	19.1725	12.4861	7.96843	9.27952	6.16614
	Csa6G040600	3.41e-16	3.58e-14	14.6319	12.0995	6.31813	7.2347	8.91527	13.1867	14.0741	17.0089	6.22853	6.18054	6.7069	11.9773	15.4968	22.0476	7.12228	8.26479	8.07428
	Csa4G642480	0.00861944	0.0431515	10.1482	7.95534	11.9899	10.4913	8.83567	10.5882	9.16037	5.31662	13.8982	11.6009	8.02272	9.77646	12.3601	7.74974	16.9115	17.0861	13.7627
	Csa6G517180	0.00105794	0.0081053	11.7563	12.9515	8.48931	9.2517	8.73651	11.5666	11.6245	13.3532	9.58216	10.0748	12.3881	10.9391	10.1463	14.5657	11.6723	8.06442	10.5779
	Csa6G497250	0.000194762	0.0019692	12.6138	12.2508	9.39604	10.9251	9.21501	12.3061	12.2051	9.46216	11.4538	10.2294	7.98874	13.4677	12.9833	9.87592	11.7429	9.95775	9.8377
	Csa1G423300	0.00173378	0.0121193	10.6876	10.7414	11.0749	16.5117	15.5937	12.163	8.42438	4.61424	14.0044	14.8114	10.8301	9.57504	8.15645	6.51585	11.663	11.185	9.75602
	Csa2G439240	0.00386601	0.0230522	11.3532	12.3989	11.054	8.97519	10.8522	9.74729	11.0523	13.4412	9.83881	10.849	10.2505	11.2595	11.4703	13.3682	9.51835	11.1885	9.82131
	Csa2G006060	0.00954571	0.0465067	8.06697	9.84901	10.241	9.13887	12.0944	11.4713	10.0932	8.61719	12.4992	13.3456	11.4003	9.38103	10.3562	10.8061	13.4151	14.2879	11.4445
	Csa3G733250	6.42e-11	3.16e-09	6.1978	6.17575	8.95715	14.384	12.7436	8.62426	5.38254	9.3981	15.1947	15.4217	16.7619	10.3306	5.88592	5.82616	14.2862	14.1537	18.181
	Csa2G008140	0.0014272	0.010358	7.76528	7.54565	9.72925	11.6313	10.3438	8.75243	7.62568	9.25352	14.8757	12.4796	12.1705	11.3454	10.9131	13.3196	15.8628	14.4964	9.91692
	Csa1G423340	5.49e-08	1.44e-06	8.44342	8.50056	12.4657	14.4372	14.1482	9.96706	7.08176	4.10339	14.789	12.0911	10.1751	9.23018	7.43269	10.1483	16.9151	14.8486	13.311
	Csa3G047740	2.25e-09	8.19e-08	2.07152	2.05329	5.24493	5.07715	3.79644	7.17595	8.20119	6.28626	17.622	14.3332	9.17984	15.2737	11.3716	7.5393	22.8334	23.3745	26.6562
	Csa6G088080	0.00203757	0.0138124	4.32812	5.28717	6.06849	3.87619	7.35755	13.5418	7.54997	6.58275	20.9437	15.3483	15.769	10.9981	10.6118	12.9893	13.4955	20.2186	13.4741
	Csa5G128260	6.04e-09	1.99e-07	12.1283	11.323	8.67317	8.39043	7.77616	14.4756	11.591	17.6442	9.48654	9.89977	12.0043	15.896	11.9107	14.755	6.26858	8.96319	7.48967
	Csa6G169870	0.00166069	0.0116941	8.25115	7.88644	8.77301	12.6598	10.578	10.6696	4.75493	3.48758	15.8027	12.8212	9.86175	14.4108	12.7133	8.66429	19.257	14.3454	13.7676
	Csa4G335240	0.00324246	0.0200683	6.51321	13.0482	9.14854	8.47635	12.1421	8.37245	7.82641	8.67485	17.626	10.5835	13.4041	7.00077	5.20746	8.19346	18.0082	9.35115	25.485
	Csa1G560640	0.000206179	0.00207474	7.02115	8.64554	5.16631	6.1101	6.94332	11.5888	9.40794	9.43856	10.4717	8.43718	8.65008	17.1084	15.4175	22.3693	14.0917	13.8728	14.3766
	Csa3G146340	1.89e-09	6.93e-08	5.74018	2.63579	6.90128	8.57013	13.1662	2.37852	1.93876	4.19194	12.5539	12.8024	14.7526	4.05312	4.8384	2.83329	12.995	49.4625	29.4952
	Csa4G674740	0.00107584	0.00820279	13.7348	12.5362	13.0153	11.8537	10.6434	14.229	10.0001	11.2765	10.2813	11.1725	11.946	10.458	12.5237	10.4768	8.78143	9.70932	7.90083
	Csa2G361460	0.00127116	0.00939522	15.0583	12.919	12.1016	10.438	11.3893	11.1438	15.0594	14.5356	10.1111	9.32027	9.45474	8.4466	10.1249	11.8927	8.94443	9.22862	10.3825
	Csa6G517350	0.000937029	0.00731704	6.48058	5.66521	8.09193	6.35706	6.79865	8.9354	4.70203	3.60303	11.5479	9.37221	6.89797	14.0676	16.7232	11.7329	20.2203	27.749	21.6711
	Csa6G001740	0.00903536	0.0446477	8.48855	9.17499	10.1348	11.7708	10.0872	10.4929	7.17889	8.69331	12.8736	12.6824	9.80423	12.2148	11.5795	13.2064	15.4036	12.5905	14.4082
	Csa3G017300	8.45e-06	0.000129088	13.5881	11.3209	9.76223	7.33082	7.40716	11.1139	11.1082	13.1445	10.4028	9.0485	9.4344	14.7397	12.0483	15.2125	12.7047	10.8045	11.6871
	Csa3G646550	6.75e-10	2.79e-08	4.01942	7.04379	12.9535	7.82063	11.6106	7.37546	6.20233	5.59644	12.6745	10.3748	13.5733	5.26123	8.03148	10.215	19.2069	29.3882	20.0946
	Csa2G362470	1.79e-07	4.17e-06	5.65032	7.52283	19.125	8.54385	15.49	11.2707	5.15095	6.77827	17.8092	11.1424	12.589	7.54241	7.48152	8.62302	13.3459	20.0721	13.3599
	Csa3G523580	1.09e-08	3.36e-07	4.35464	9.8412	4.92039	1.75747	3.91941	17.1525	12.9627	11.7727	7.80201	4.04471	6.47691	20.4711	20.3878	30.3584	11.7941	14.8543	8.63745
	Csa4G658600	2.29e-05	0.000312234	12.2637	13.5249	11.2219	13.4542	10.3458	12.4615	10.1853	15.2458	10.0744	9.48685	10.3751	12.9997	14.6445	10.8981	8.41759	7.7734	8.57478
	Csa5G613600	1.13e-15	1.09e-13	12.9224	13.3612	4.48119	7.37353	6.9758	15.214	13.8632	18.2865	8.20275	8.72018	9.34203	22.152	12.4382	19.7684	6.22415	5.3421	7.32676
	Csa7G037630	0.00651745	0.0349694	14.3676	12.8848	14.0133	13.3869	10.5325	12.8298	11.5179	11.8465	11.055	11.9634	11.8519	9.96053	10.812	9.52823	9.58547	8.87148	7.20032
	Csa1G588530	0.00143232	0.0103757	15.1952	13.3918	12.4128	11.5292	10.2807	14.6516	14.2104	6.82705	11.2307	9.19528	8.18467	10.7696	14.4695	11.0691	10.5729	10.5514	7.89716
	Csa3G889690	2.68e-05	0.000356674	7.81088	9.09595	11.6585	10.7889	10.5306	10.2001	8.07453	8.12195	11.6027	12.6863	10.2826	10.3191	11.4454	12.4052	15.9063	16.5546	14.9941
	Csa7G037520	2.64e-05	0.000351575	12.2604	10.9882	13.39	14.9011	13.9023	10.9942	7.63935	6.85144	13.7178	14.3468	13.4318	8.93899	9.37707	8.76226	11.8571	11.6969	9.8049
	Csa1G166810	5.49e-06	8.78e-05	10.3502	10.1877	8.39782	9.03928	7.4465	15.7642	9.49786	12.3441	9.89255	9.30859	11.7478	16.9094	15.4807	15.5308	9.12385	12.6246	9.52327
	Csa4G290860	1.17e-05	0.000171042	13.1366	11.7132	8.84906	12.2461	9.96187	13.4334	11.3841	12.5799	8.78934	12.3391	10.3949	15.55	14.018	13.0722	9.39431	7.4735	8.84225
	Csa3G854190	6.59e-09	2.14e-07	8.17732	6.96937	11.5648	14.8367	12.0371	8.66693	5.94588	7.54734	15.7302	14.9605	10.5767	9.83353	11.9565	10.1689	13.6893	16.0491	14.6194
	Csa1G425940	0.00297034	0.0187741	6.60389	9.7698	11.4761	8.42702	13.2028	9.46929	8.91186	8.06273	13.0924	10.1669	10.6854	10.8919	10.1246	13.0863	15.6758	19.7517	14.3684
	Csa2G252090	0.00232055	0.0154183	13.1356	11.5733	11.4722	9.97458	10.9526	14.0979	10.8865	14.0631	10.5068	10.9816	11.1	10.3828	12.5563	12.6222	12.457	9.71863	7.35489
	Csa3G119470	0.00028301	0.00269619	7.64724	7.98792	10.2808	8.398	9.45097	10.2761	10.3863	6.38457	13.2769	12.5178	10.9371	12.6176	10.5408	11.4421	16.4877	19.4546	15.8936
	Csa7G374640	2.46e-05	0.00033221	11.0256	11.4738	9.51403	10.4244	10.1135	14.1919	10.5101	12.4099	12.0463	11.5544	11.6868	13.4089	12.9209	13.4298	10.9505	9.21403	9.38762
	Csa3G073920	5.62e-06	8.96e-05	8.50298	9.70423	5.64811	5.21494	5.23101	14.1302	11.9388	11.5682	7.36194	7.2011	6.99333	15.7565	14.0175	22.5495	18.3237	17.895	12.4496
	Csa4G082350	7.26e-05	0.000847301	8.91552	8.72705	8.83253	11.1977	10.7332	9.2405	7.75312	6.73902	15.953	12.9848	11.5858	14.1837	10.76	10.0732	15.5339	16.5189	14.7639
	Csa6G525220	0.000488154	0.00424469	6.89878	5.79975	10.5277	9.17066	11.7261	11.807	10.2971	7.72679	14.0531	13.1682	10.6744	12.7543	14.1421	9.27675	16.1494	15.8052	14.6983
	Csa7G276700	0.00342912	0.0209851	8.55572	9.53868	10.9438	13.0402	10.7095	11.262	5.20463	4.28558	16.3834	12.7098	10.9715	15.6615	11.8094	9.02747	17.2208	15.2668	12.3091
	Csa2G360740	6.72e-09	2.18e-07	12.5486	14.6593	11.2837	10.1741	9.84703	12.8494	12.2083	12.4801	10.4523	9.85897	8.68434	12.1758	15.6278	15.0377	10.4679	7.85547	8.70194
	Csa6G091980	0.00105997	0.00811427	8.93598	9.94621	12.743	11.1624	10.7122	12.5426	8.86446	7.03906	13.7563	12.2957	10.9399	11.6519	11.7718	9.83165	13.9419	14.8386	14.3802
	Csa4G052640	0.000107027	0.00118795	11.2942	13.1043	9.1671	9.70854	10.0394	9.88882	14.7821	15.822	9.7548	8.82662	9.69345	11.4384	13.4781	15.1364	11.3408	11.1945	10.8323
	Csa3G576340	2.05e-05	0.000282597	7.84232	8.13318	12.111	9.7944	9.8227	10.6168	8.65292	7.33007	13.6604	15.2108	9.05096	10.3738	11.9146	11.1307	15.3599	17.9093	16.7023
	Csa5G604240	6.72e-13	4.3e-11	14.5648	12.4958	8.88146	9.94222	8.26508	11.9504	13.7801	18.9846	7.98745	9.78194	8.79379	14.0177	16.1544	14.9441	8.53178	9.22966	7.43563
	Csa7G270550	1.01e-06	1.97e-05	10.5472	9.10403	15.6849	15.8343	16.0893	10.8585	10.0356	5.66001	13.6297	15.2641	10.7483	6.92222	9.88372	7.04408	12.3638	13.3191	12.7602
	Csa3G590590	0.00203021	0.013778	10.9097	10.4735	11.2671	12.3158	11.7641	11.4529	8.18108	7.68132	14.9643	12.6656	11.6818	11.5229	11.3479	10.3133	14.5597	13.2812	11.6177
	Csa7G211090	0.000217537	0.00216843	5.40759	7.47269	11.9837	7.37817	16.3839	7.39452	7.10106	8.7475	13.1684	11.0758	9.96384	7.27761	10.2856	14.9784	15.7041	24.0629	18.0165
	Csa3G635360	0.00817873	0.0414567	11.7205	10.6433	12.7676	14.9608	10.6763	11.5835	6.85214	5.15252	12.8631	11.922	9.49332	12.889	10.7445	8.61087	18.3029	12.742	14.5266
	Csa4G004860	0.000924575	0.00724054	12.0307	10.3454	9.47219	9.22349	12.6548	13.9054	14.2351	11.9562	11.4855	10.2825	10.8767	12.7443	12.5776	15.8736	7.19294	11.2515	10.5038
	Csa1G033010	0.00226366	0.0150876	16.0024	13.8858	13.6556	15.2314	10.7884	12.1686	11.5534	15.2909	9.03127	10.6651	12.8756	12.8461	12.2736	9.73081	8.0797	4.01991	8.60115
	Csa1G109360	0.00672968	0.0357959	10.1341	9.86227	17.0177	15.2641	14.7305	13.8294	9.14144	6.52064	14.4571	10.809	8.68484	7.87444	11.4557	6.13806	14.2168	15.2092	11.5586
	Csa3G848200	0.00992595	0.0478095	13.5297	11.549	10.1837	12.264	10.0175	12.1544	12.5466	12.1068	11.2597	12.344	11.5485	11.3816	11.0941	12.9969	11.1361	9.78883	11.4703
	Csa7G237880	0.000907275	0.00712598	17.3097	16.054	13.5075	16.3152	10.7852	10.0259	10.9938	19.0511	9.14677	11.4277	11.3099	10.6699	13.6611	8.4376	8.76422	4.98169	5.18739
	Csa1G537400	2.18e-05	0.000298947	8.73961	8.24193	12.4634	11.828	10.3119	7.10681	9.49394	9.06851	13.4523	14.9412	11.6912	12.3483	8.66682	6.1965	15.5181	15.4461	22.1387
	Csa6G485130	1.54e-05	0.000218883	13.3095	17.1808	11.1916	10.6511	11.3402	11.1511	13.7202	16.9513	8.49051	8.89719	12.7737	9.75087	12.8516	15.2424	7.60331	7.88024	8.87627
	Csa6G112470	2.36e-07	5.3e-06	16.8596	14.5829	9.68909	10.8112	9.43146	12.8928	18.2895	22.884	6.28895	6.37583	13.1612	10.0989	9.45878	22.2689	6.09435	5.29897	3.61094
	Csa5G630810	3.33e-05	0.000430246	10.0468	13.6781	8.91324	7.43789	8.63587	13.7329	10.5773	10.5601	10.2598	9.21615	10.1519	13.1334	15.1446	19.2593	11.0431	13.5179	12.9227
	Csa5G579040	0.00817139	0.0414407	9.86055	6.92491	9.94904	10.7544	11.7522	9.45189	9.88216	9.2863	14.3694	9.33816	13.3851	12.688	11.0921	12.0402	14.4825	19.2608	14.0541
	Csa3G728090	8.37e-05	0.000957965	17.5781	14.297	15.1123	13.889	12.4588	13.4487	12.0285	14.3099	9.59006	9.90987	13.5491	11.5972	10.6529	9.2394	6.32458	7.40141	7.45295
	Csa3G829200	9.58e-05	0.00107536	15.6116	13.4262	11.775	11.1676	10.0644	11.5244	12.1354	17.0486	9.81527	8.12567	10.677	13.3998	11.3197	11.6161	9.83314	11.6443	9.76595
	Csa7G430150	4.33e-05	0.000538795	7.59764	8.08537	11.1396	10.1334	11.631	11.4933	8.73871	5.70615	12.6263	16.9296	11.8754	10.3917	13.1504	8.75788	12.8292	19.9147	18.0862
	Csa6G507230	0.000119484	0.00130345	5.23769	4.71963	11.5957	7.58562	15.4859	13.2332	6.59179	10.9706	16.0114	12.6361	23.2626	11.9187	8.56851	8.07873	11.0681	21.2414	11.4602
	Csa4G015810	4.17e-16	4.27e-14	19.0577	17.3013	12.5489	11.8624	11.6943	13.2475	12.9702	13.439	9.51519	8.12897	9.74478	10.4272	13.8369	15.1132	7.22955	6.68706	7.12177
	Csa5G429970	0.000928111	0.00726227	19.156	15.9474	15.7744	15.2133	11.3576	11.0083	10.7252	11.4115	9.97172	9.2305	9.97848	10.7955	15.5993	9.38069	11.5116	6.93524	5.93725
	Csa5G623380	8.93e-06	0.000135385	12.4377	13.4712	10.6019	7.75667	8.98354	13.2217	12.8324	18.6365	9.09204	7.62377	10.9858	12.2702	14.428	13.4677	11.3849	11.9597	10.8263
	Csa2G378520	0.00817339	0.0414407	9.77815	9.30441	11.9723	13.5805	10.6725	12.4289	8.37014	8.72732	17.0637	13.649	10.6832	14.8417	9.82451	8.59913	13.8337	13.2251	13.6969
	Csa6G490830	1.7e-13	1.18e-11	13.5142	20.4223	12.5816	10.353	10.5565	13.6217	18.6134	15.629	7.61012	8.7509	6.63671	10.9288	15.4268	16.9424	6.83754	5.99285	6.03559
	Csa1G615190	0.00319777	0.0198508	15.8302	12.2851	16.1325	12.6943	12.5003	13.322	12.0171	11.4193	11.2812	9.81436	10.0515	10.5787	12.393	11.1856	10.6149	9.81202	8.62183
	Csa5G623810	5.41e-10	2.27e-08	3.87977	3.22758	9.83637	7.24782	7.95969	6.15675	3.62998	8.27985	9.03143	13.92	15.1304	12.0971	15.0197	9.098	24.6553	31.143	20.5303
	Csa2G245410	5.01e-09	1.68e-07	17.255	21.1538	11.8229	11.4537	14.9774	13.0326	14.2326	13.5931	7.57444	6.65936	7.39584	8.37213	14.9011	12.5616	9.77184	8.80581	7.32468
	Csa2G437070	0.00053396	0.00457416	6.93425	7.92763	11.0327	7.65757	10.3881	10.1252	9.46291	9.18862	14.0206	12.0186	12.7518	13.6145	12.8654	12.6684	14.8895	19.1602	16.6654
	Csa3G183890	0.000417203	0.00372455	9.33026	8.97157	12.0975	11.7061	14.7364	12.3774	10.027	6.67762	12.4984	13.3851	11.7091	9.8381	12.4644	9.26173	13.6941	18.7487	13.8992
	Csa2G069200	0.00563261	0.0312597	3.08338	11.3721	8.66588	7.69188	6.3021	9.30003	11.0384	10.8161	16.1256	21.5232	12.2426	7.52984	5.3498	9.34719	13.2484	23.6756	24.162
	Csa5G270900	4.21e-09	1.44e-07	16.3728	14.5739	11.3043	11.4076	9.75468	15.8213	15.8546	9.98873	10.165	9.5182	6.97354	11.8625	14.006	15.1489	10.3886	10.6618	7.811
	Csa7G014500	0.00831467	0.0420015	5.36655	10.1248	10.4858	8.19325	11.914	12.5597	7.21043	8.34953	13.7142	9.62933	12.36	9.82914	10.3524	13.249	16.5487	27.9588	13.9178
	Csa6G425170	0.00249456	0.0163298	7.46427	7.7662	11.6614	8.66617	12.8621	8.23997	11.3502	11.5118	13.233	13.4173	10.4892	10.5294	11.2791	11.2811	16.5475	20.3793	15.1788
	Csa1G422470	1.45e-06	2.75e-05	1.48109	3.79546	5.18203	4.7958	13.235	3.81753	5.0249	3.81423	10.9358	17.3416	21.4161	10.8508	7.34321	19.9518	17.3303	38.548	17.0498
	Csa7G390740	2.27e-14	1.81e-12	11.0767	9.62956	8.67064	7.34224	6.71021	14.151	12.2389	13.6119	9.93337	9.19131	9.05133	18.5771	17.1866	19.5199	10.5834	12.3179	12.5157
	Csa6G014770	3.04e-06	5.19e-05	12.5429	9.82713	7.92894	8.22792	9.22866	13.512	14.1972	18.0312	9.91433	12.3986	10.3364	15.4279	12.8641	17.8551	8.66509	8.94267	12.4526
	Csa5G610420	2.32e-05	0.000315251	13.0356	11.5376	12.2315	10.0383	11.0997	12.8548	12.6473	10.0282	10.0914	8.72929	9.89994	16.2655	13.9234	15.0523	10.3049	13.1532	11.6157
	Csa1G039290	0.000675608	0.00559626	11.3458	10.9569	12.4239	14.8373	11.8735	10.9828	7.35022	6.09009	14.9035	12.9331	9.13511	11.5555	11.7518	10.0338	17.5317	15.2906	13.5569
	Csa3G171800	0.00333588	0.02052	8.29919	7.74428	9.00723	11.9491	9.44974	9.13239	8.27579	9.02514	11.7564	13.0371	12.8029	15.5608	11.6018	15.0883	18.2264	14.4696	17.6755
	Csa1G072470	0.00397081	0.0235813	12.3092	11.7841	13.5171	12.85	13.7018	9.73311	7.34273	9.5938	11.7174	13.3366	14.4099	9.92494	12.0972	11.006	14.5646	12.4041	12.8102
	Csa3G880550	9.62e-08	2.39e-06	12.1071	12.4038	10.2969	8.3118	9.18941	12.0734	12.2693	14.34	12.2072	9.75392	9.13062	17.1722	14.5571	13.7666	11.8759	12.3873	11.4575
	Csa4G043840	9.46e-06	0.000141958	9.92503	10.4325	14.6956	13.6299	18.1838	10.0894	8.98982	10.0698	13.2903	12.6827	11.7255	8.73684	7.71174	9.36056	12.1878	18.7768	13.1279
	Csa2G299920	8.86e-08	2.22e-06	4.34	4.50255	14.2993	8.23543	20.2511	14.5584	4.56127	6.41209	25.4188	13.2673	14.1225	10.316	4.28597	3.68775	15.9156	24.7458	14.7622
	Csa1G613500	0.00108283	0.00824621	2.4535	4.08213	6.45711	1.48902	8.35063	9.68095	5.038	13.0138	16.4573	19.7046	23.7714	9.41542	7.67438	14.6374	13.7978	26.6658	21.045
	Csa6G362410	3.25e-05	0.000421179	14.4003	12.9409	10.4291	11.5739	11.0147	14.1914	13.1899	17.0369	10.8858	11.0351	11.0067	12.3126	10.5588	12.5381	9.24842	9.99307	11.5415
	Csa3G889940	1.7e-13	1.18e-11	12.7226	13.6054	9.00161	7.94236	9.28972	14.7342	13.7796	16.1518	10.2403	9.62208	10.1048	13.9141	16.8368	13.9415	10.4331	12.4273	9.55446
	Csa4G652130	0.000165358	0.00170628	10.7776	10.4537	9.16994	8.83813	10.4026	13.4285	12.3525	9.6555	9.03278	11.1589	8.71634	18.5932	14.3403	19.1952	12.8913	10.862	14.4662
	Csa5G523070	2.13e-05	0.000292588	14.1755	11.4214	9.69255	10.8293	10.1824	8.95956	15.3748	19.1409	6.86283	11.0228	10.3327	15.3856	15.9548	20.6515	8.44123	6.59533	9.80623
	Csa5G612260	3.85e-05	0.000487382	9.45711	9.87223	9.97416	12.7395	10.6985	11.3282	7.50441	8.83397	16.0638	15.6134	11.5358	13.0092	10.7692	9.3628	17.7945	15.691	15.105
	Csa3G168380	0.000749749	0.00607605	12.2361	13.3022	10.0834	7.12664	12.1208	10.5862	11.103	17.5561	10.7298	8.10426	10.1981	14.1375	14.5108	19.1835	12.5688	11.9071	9.90437
	Csa3G592170	0.00364505	0.0220239	11.5855	11.1546	12.5785	13.5086	13.146	8.69968	10.4103	9.65682	14.5203	14.2199	12.1929	12.0531	10.464	11.694	13.7004	14.0791	12.1913
	Csa3G782790	0.0100316	0.0481845	9.59479	10.9759	12.6644	13.6725	13.9548	15.0735	7.79473	5.70624	17.555	13.5136	10.8243	11.696	11.8863	8.14722	17.8838	15.2001	9.85152
	Csa3G640580	0.00483882	0.0277175	12.8557	15.2911	11.9576	13.2896	11.5255	12.4021	11.1666	13.027	12.3372	13.9099	11.715	13.866	12.881	10.8823	10.7064	9.37569	8.80702
	Csa5G614670	0.00844194	0.0424076	5.44844	6.70405	6.52241	5.05498	6.36609	11.0553	12.1377	14.4602	7.97033	10.4091	8.33073	17.5877	14.8295	34.1052	12.2281	15.0098	18.1838
	Csa4G470690	0.000658827	0.00548132	8.2932	9.76434	18.3226	7.83471	15.0887	13.5907	9.09276	12.4934	19.0226	14.0217	20.5407	9.11928	6.73772	4.37994	9.6198	18.09	10.4021
	Csa7G450630	8.4e-06	0.000128498	9.60177	10.163	9.32279	8.87415	9.92724	10.2381	15.024	15.4132	9.06437	9.02777	9.55288	20.0244	16.1396	19.91	12.3691	10.8729	11.2699
	Csa3G164470	5.62e-16	5.7e-14	13.2991	12.9575	8.9487	7.38713	8.15666	14.2839	14.7069	15.1154	8.73424	10.3003	9.46856	13.666	19.1322	18.7699	10.5361	9.86877	11.4782
	Csa5G633170	0.00122806	0.00914527	5.59055	12.3047	22.7654	8.98535	18.4007	13.2103	11.5218	3.9586	24.9128	11.0462	8.18244	3.7246	5.01055	2.95563	19.5254	23.2116	11.544
	Csa6G526480	0.00728305	0.0378934	13.0601	13.8004	10.597	12.996	9.80085	12.2456	10.8018	8.78269	13.7144	9.66305	8.33922	18.1498	14.9271	15.7159	15.8098	8.89288	9.74745
	Csa2G000030	3.01e-05	0.000395015	12.9304	11.29	16.5585	16.9574	15.9679	12.4277	8.83647	7.2637	13.4443	13.3464	10.9093	8.10397	11.1298	8.12032	13.0621	14.4571	12.3788
	Csa2G163170	0.00727851	0.0378804	2.78839	16.0918	17.25	5.30871	22.5271	10.8394	9.74936	5.34432	14.4197	11.0867	14.2788	4.4892	7.83895	4.24804	14.2238	24.6083	22.5822
	Csa3G597260	0.00681569	0.0361023	9.38702	10.2786	12.061	10.694	13.7203	12.1399	8.40735	7.3775	13.0611	13.2764	12.1013	13.3967	12.0583	14.0995	13.2863	17.2146	15.5543
	Csa6G502620	0.000209758	0.0021052	13.3325	15.0386	14.1103	10.9036	12.1486	11.6636	14.4916	12.6465	11.1944	9.99889	9.13725	11.4004	14.1806	14.0578	11.9402	10.7214	11.298
	Csa7G378430	0.00349451	0.0213101	8.11105	9.51555	11.3189	11.486	12.5303	12.1873	7.55803	10.0477	16.5584	12.7957	10.2606	13.2531	13.7696	11.3506	16.9883	17.3019	13.3437
	Csa3G852610	1.22e-13	8.65e-12	14.6751	7.02481	5.82809	8.34525	3.34441	14.339	11.4657	16.6699	3.56947	7.00455	3.79237	26.9488	30.8606	33.3609	6.83337	6.85668	7.87004
	Csa6G110310	0.00634668	0.0343138	14.0432	14.6495	14.2631	11.3957	14.7588	12.7588	12.2912	15.8061	10.5933	9.30777	14.4339	10.7893	12.6252	13.4075	10.5459	9.41528	8.42143
	Csa4G307370	0.00613551	0.0334396	10.4943	11.1937	10.1487	10.6191	8.57481	13.1648	9.70622	13.2631	12.8989	11.0414	11.2806	16.4462	13.7892	18.5375	11.884	13.0937	13.5597
	Csa7G257840	2.23e-32	8.49e-30	23.7141	26.1707	6.14957	6.57349	9.00837	14.3643	16.8103	25.7939	4.58287	3.89826	5.17175	11.6616	21.7812	22.4279	3.79619	5.0026	2.79755
	Csa4G650210	0.00885553	0.0439985	11.0807	11.5437	11.2777	15.4371	14.7596	13.3251	7.54017	2.46498	16.3355	16.811	9.22105	10.8427	12.824	7.12799	19.6383	13.9837	15.8152
	Csa2G008080	0.0046407	0.0267513	15.4392	12.2766	16.9225	15.1404	14.441	10.2798	9.21083	9.61384	12.8664	11.5897	10.9787	9.53064	11.5187	9.22627	14.4967	13.7165	12.8316
	Csa6G361390	5.74e-16	5.79e-14	17.4689	16.181	9.5563	8.42591	9.69305	13.3289	17.1192	20.4461	6.88081	8.53978	11.1463	16.0209	16.0016	15.4682	6.92689	8.64848	8.29462
	Csa6G525520	0.00886285	0.0440232	15.4046	14.8231	13.0327	12.7411	12.4864	17.3532	13.3624	7.41845	12.9029	11.5026	9.48129	12.6507	12.6766	12.1365	10.9192	10.9544	10.3273
	Csa3G182780	2.32e-08	6.64e-07	13.1113	14.3966	9.87388	11.0345	10.17	12.8853	16.4784	12.3586	11.9645	7.77843	8.4976	13.9643	16.2141	18.0172	12.4451	11.2434	9.94396
	Csa5G440100	0.00323886	0.0200526	9.70084	8.61645	10.5217	8.2959	9.27155	14.2216	11.5078	15.3488	11.3639	9.85416	11.0187	20.152	14.2353	16.97	11.969	14.3459	13.172
	Csa4G669220	0.00772855	0.0396918	17.6099	13.7454	14.737	15.3752	13.5781	12.3331	11.1649	12.7241	11.256	11.3743	14.6164	11.7608	14.0532	11.2051	8.83199	8.62669	7.79966
	Csa3G134570	1.33e-07	3.18e-06	7.36422	10.2878	12.0432	10.9184	12.6912	11.099	8.43329	9.29016	15.2675	12.3465	13.5116	12.281	12.1844	11.9308	17.7443	17.9652	15.7089
	Csa6G497260	0.000647741	0.00540559	13.6726	15.2654	11.4627	14.0623	11.471	14.2695	11.4484	9.9196	12.4704	12.2212	11.1853	14.4713	13.3153	14.3344	11.0482	9.51509	11.0635
	Csa5G242650	0.00841326	0.0423193	11.173	10.7478	15.4758	14.5035	12.7758	12.9284	8.83218	5.89681	16.3702	13.8826	11.1951	14.4953	11.3678	9.96434	15.7405	12.5391	13.3968
	Csa3G017050	0.00322934	0.0200066	10.4259	10.65	9.75177	6.98713	8.48475	11.4542	11.2305	9.95764	12.4043	10.0155	11.445	17.3167	18.2634	18.6834	15.8675	16.1641	12.4577
	Csa3G280950	8.71e-05	0.000990012	13.4197	12.7	7.81844	12.9634	11.0323	12.6738	10.8812	17.1356	10.9989	9.69208	12.6082	14.0392	17.0622	17.5158	10.5125	10.0597	10.5556
	Csa1G049460	1.11e-09	4.28e-08	6.24111	7.34445	3.67928	2.96167	2.89655	10.1739	13.0037	11.9562	4.98798	10.4643	5.20191	22.6673	39.5133	28.0031	10.0367	14.9755	17.6439
	Csa1G042840	0.000356675	0.00326992	9.1774	7.82969	9.99672	14.254	8.66212	12.4332	5.76063	4.65685	17.3098	13.9717	10.5767	15.8881	8.78988	9.97231	26.8628	15.8895	19.7325
	Csa3G914050	1.79e-06	3.28e-05	10.5834	9.35002	13.5634	16.6161	14.9219	9.73933	8.26757	11.212	18.6207	11.641	16.5679	6.46137	7.02776	10.6635	17.8124	16.4742	12.5085
	Csa1G202300	9.32e-10	3.7e-08	6.67612	4.85273	8.11439	12.7629	12.0439	6.9483	3.43946	4.99203	11.1822	12.5711	9.89351	9.78215	10.6408	12.3674	42.0501	16.6231	27.1224
	Csa6G425060	0.00640776	0.0345363	10.2119	11.4864	10.9291	14.8561	13.3934	13.827	8.71091	8.11501	15.1003	14.1671	13.0538	12.0376	11.7255	12.2492	14.1568	15.6128	12.5576
	Csa5G604060	2.73e-05	0.000362148	5.98443	9.56893	9.50951	10.1485	13.482	13.6043	8.19878	7.28659	16.8278	15.1694	12.6914	11.5773	11.5035	11.8661	18.097	21.8957	14.9488
	Csa4G004980	7.87e-06	0.0001213	4.1636	4.73224	9.43633	9.07991	8.28849	9.20003	11.0169	10.4994	15.2967	18.0744	12.5018	10.9812	14.5863	15.2235	16.3177	20.4274	22.9514
	Csa3G146510	0.000429198	0.00381023	4.13366	8.27818	9.28339	6.63016	10.4514	9.92813	8.91831	7.83063	12.0916	14.4341	11.3103	16.0691	9.39522	14.4179	24.885	25.4206	19.6562
	Csa2G379140	0.00659857	0.0352863	14.4959	11.1881	9.45721	11.5775	9.45529	10.909	13.6577	15.4739	7.11683	13.1902	10.4463	16.048	17.6801	15.4527	7.66952	11.7252	17.9214
	Csa6G490130	5.19e-06	8.36e-05	11.2843	12.4569	11.421	10.5017	9.91072	11.6477	12.8443	17.2094	9.51308	9.99965	9.40824	18.1564	15.0578	19.7876	12.2817	10.2089	12.1306
	Csa5G426400	0.00297684	0.018809	8.04015	10.1184	10.1854	12.6649	11.0246	13.2354	6.68103	5.05754	18.0274	15.1257	10.1011	17.594	12.21	8.30861	21.5986	17.4743	16.6774
	Csa7G432350	0.000296795	0.00280734	7.37706	7.52562	10.2639	13.3823	12.715	6.85442	8.78848	14.495	14.1054	14.7938	14.1003	13.5444	10.5383	11.8546	18.2016	18.7428	17.1147
	Csa3G823070	0.00361799	0.021909	4.70998	5.83566	9.19614	5.54745	7.48099	14.1404	9.29546	7.81209	15.8924	11.9848	11.1001	15.5942	15.474	15.7718	21.3305	23.1802	20.0944
	Csa2G360600	0.00561387	0.031192	7.46862	7.23139	9.91649	12.4036	10.0764	12.2934	8.8513	12.547	15.1075	16.8034	13.7127	17.253	10.6634	12.7803	15.5292	14.4536	17.3658
	Csa6G520310	0.000652942	0.00544423	19.4345	15.4993	14.2664	15.0416	13.3881	11.9107	14.2936	17.9361	9.66068	10.1777	12.5882	11.2377	15.4584	8.36901	11.0685	8.08647	6.5128
	Csa6G411220	0.00929825	0.0455923	8.09457	11.8162	12.677	9.63906	12.5192	15.5531	8.82571	6.03369	15.0331	14.1496	11.7158	11.9204	13.4733	9.52127	19.0548	17.954	17.058
	Csa4G048040	5.81e-07	1.19e-05	9.41853	9.98913	13.2888	14.5446	15.8174	13.5727	9.24075	7.21265	15.1989	14.5864	14.5612	11.2474	11.7318	10.1675	14.3761	14.4997	15.5981
	Csa3G810530	9.78e-06	0.000145958	7.80215	8.9248	12.1293	10.8611	16.2859	9.68753	7.76418	9.9746	15.4802	14.8383	15.0216	9.55159	11.8282	14.7919	13.7505	18.6789	17.9151
	Csa7G237890	0.00814607	0.0413682	10.0777	12.0471	12.962	12.4821	14.7753	11.6865	11.3608	8.88221	14.2653	13.8051	11.3967	10.3614	12.3934	12.8185	14.2703	18.3374	13.4806
	Csa3G478200	0.000242426	0.002378	18.5677	14.9211	14.7907	10.9445	11.4145	15.3404	14.3561	10.1934	12.4982	11.3752	8.60506	12.1187	14.9932	12.2887	12.2135	11.7122	9.13549
	Csa3G134910	0.00516647	0.0291823	6.93499	4.80509	12.437	7.93752	11.9062	12.7752	7.99203	15.3901	15.8902	13.3634	21.7918	11.7564	9.82817	13.9127	11.4503	20.9584	16.6534
	Csa6G003400	3.74e-06	6.29e-05	13.6635	15.0794	10.7692	8.92818	10.9889	15.6787	15.5337	11.0199	11.6587	10.5102	8.19476	12.4597	16.8786	15.8151	12.4952	13.724	12.6077
	Csa4G314520	3.05e-11	1.56e-09	10.4249	11.5899	8.22197	7.92993	7.4288	21.1472	15.2588	12.3902	10.5139	9.72425	7.87968	18.0961	19.8327	16.4866	15.1437	12.5251	11.8169
	Csa1G033040	6.28e-21	1.04e-18	9.80564	19.6956	4.88087	5.04656	5.16865	19.401	16.3436	17.1914	7.4191	4.39232	4.20785	22.311	25.0816	44.1291	4.08117	4.85437	2.73559
	Csa7G062910	1.46e-05	0.000208115	6.08764	7.62732	10.2153	9.91618	13.2906	11.9105	5.93074	11.4285	19.1009	16.184	19.8815	14.5324	7.39587	12.3506	18.4178	17.8564	14.7115
	Csa6G212900	0.00250737	0.0163912	9.3889	8.11997	13.2799	11.6373	12.5419	11.5476	13.0887	7.087	14.4313	13.8401	12.0389	12.598	13.4986	12.3932	16.0948	15.4116	20.1442
	Csa4G049100	4.21e-08	1.13e-06	4.89727	8.93405	10.8633	9.15802	15.8114	9.88597	9.75153	8.26195	18.8589	15.6569	15.2628	8.58443	7.4393	12.9677	19.8701	22.4991	18.8474
	Csa2G058690	9.25e-06	0.000139365	6.74572	9.21347	13.5429	15.4571	16.62	11.6091	7.93028	7.27234	16.9985	18.9292	14.2427	13.2956	11.1705	12.2834	12.7131	13.7078	15.8668
	Csa3G345390	6.16e-06	9.73e-05	12.378	13.3133	10.774	10.9341	11.7633	16.216	11.1456	19.5014	11.1529	11.002	11.1596	15.8741	14.4453	16.8762	8.47	11.9766	10.6707
	Csa3G851790	0.00679836	0.0360653	7.90609	7.65427	12.6456	10.9354	10.7079	13.6895	9.37766	12.1601	14.5398	13.4824	12.518	12.1232	10.9342	13.6702	20.4593	18.2851	16.6967
	Csa4G572280	3.47e-06	5.88e-05	10.9462	9.1956	13.1182	12.9811	14.2415	12.9683	10.0825	7.63185	16.5579	14.5416	13.8562	12.3767	11.0395	10.0955	16.3089	18.7453	13.1967
	Csa1G277470	3.15e-10	1.38e-08	12.8396	11.326	17.6454	16.1811	14.4413	12.2712	9.07715	9.76546	15.6119	14.8959	15.5935	8.52642	9.67598	7.98829	15.9722	13.9298	12.4545
	Csa3G118040	8.39e-05	0.000958631	15.6243	16.5066	13.2546	12.7491	10.6126	14.5527	17.8108	14.8567	12.1485	12.1836	10.8171	10.7487	11.1665	12.9155	11.6013	9.55038	11.247
	Csa3G807310	9.76e-07	1.91e-05	23.7748	20.1563	14.9999	16.15	11.4373	13.6232	17.4028	19.1139	8.94721	10.5015	11.44	10.0941	17.6163	6.81703	7.6014	5.46092	3.46087
	Csa6G138120	0.00401072	0.0237399	13.7275	13.5592	13.4642	15.3669	13.3203	12.4931	12.8187	16.6493	10.9928	10.7793	12.6001	15.068	13.7827	11.8925	10.5192	10.5125	11.2304
	Csa5G603280	0.000250089	0.00243811	10.9322	9.50379	14.1392	15.1618	13.1205	12.6165	10.457	11.6766	15.3915	13.2364	13.5967	14.029	9.32172	10.3343	15.6916	15.3382	14.786
	Csa1G538180	0.00316165	0.0196832	19.9055	13.7019	17.17	15.7645	12.5411	14.5504	14.7981	9.56037	11.7046	10.5829	9.76049	11.7256	13.8317	12.1344	12.0473	10.0218	9.68954
	Csa3G144220	0.00680809	0.0360821	11.9792	7.4192	11.1973	19.0434	18.1255	11.5491	9.99931	4.23566	16.4506	23.0645	8.25784	12.6418	12.2727	10.1155	15.1838	16.5047	11.473
	Csa3G790460	1.36e-07	3.23e-06	12.7073	12.147	16.3385	14.5373	13.9746	11.0941	9.86078	7.30648	16.1674	13.3089	14.9294	10.0832	9.98896	9.53925	15.9918	15.6749	15.9046
	Csa7G387180	1.11e-06	2.15e-05	11.9084	14.1378	9.68199	9.18854	10.7527	16.0857	14.0633	11.1623	12.5061	11.0714	10.5139	14.6426	16.1267	16.514	14.4121	14.1683	12.6725
	Csa6G524010	0.00978319	0.0473732	9.35301	10.3008	7.76018	7.06386	5.50209	10.2335	11.3718	13.505	10.5295	9.14456	11.5383	17.5113	22.4734	21.6746	17.8914	19.6366	14.4043
	Csa4G001610	0.00720285	0.0376407	12.3441	14.414	9.93953	14.8371	11.3814	13.6308	11.8381	18.9341	11.979	12.5989	13.8127	16.2491	12.0125	13.1694	10.1455	11.0786	11.584
	Csa6G148250	2.26e-11	1.2e-09	4.6373	6.55425	11.9814	8.6646	14.0037	10.8284	7.96361	8.27023	19.206	18.1358	12.5929	5.45261	8.17118	9.20415	26.3237	21.8633	26.2686
	Csa3G895740	2.87e-18	3.78e-16	18.2126	18.2557	9.9414	10.1232	11.0244	15.0035	18.8474	16.1297	10.0017	9.40512	9.12352	14.718	17.7581	13.253	10.56	7.61245	10.2326
	Csa5G614680	9.04e-07	1.78e-05	7.74837	7.13159	15.913	10.2712	16.2551	14.5171	7.45549	10.4775	19.868	11.5629	16.2623	10.9905	8.69297	7.48169	18.7754	22.0164	14.8621
	Csa3G002440	6.72e-05	0.000794677	14.8724	15.268	9.18515	6.99518	10.5738	9.18521	13.6933	17.6262	5.38176	12.6714	9.9031	17.7707	22.7431	16.8224	11.4864	12.2551	14.0897
	Csa3G777680	0.00280765	0.0179842	3.85949	12.7308	13.6764	8.76928	12.7628	13.6765	9.50504	10.1676	20.0137	12.4958	11.465	8.65262	9.8855	11.1494	21.9183	22.6206	17.4637
	Csa1G538230	0.000103064	0.00114904	10.2551	9.57688	14.4276	13.7055	17.3911	13.3599	6.30736	8.84005	15.5705	12.6169	13.1439	13.9704	11.0599	11.9513	18.3898	16.9628	13.6554
	Csa3G780540	4.75e-10	2.01e-08	7.03562	10.4394	15.3757	12.635	11.965	11.6238	7.98745	11.3298	16.2276	17.3846	19.7409	7.91391	9.03659	9.1403	17.7706	15.7325	20.1761
	Csa1G526830	1.32e-15	1.26e-13	13.2303	18.2694	6.84697	4.82687	7.00471	16.9191	18.4972	23.6711	6.98834	5.67778	9.78517	19.6693	14.6877	26.9152	7.52749	10.747	10.6196
	Csa6G483270	3.58e-07	7.71e-06	11.3173	13.758	10.674	9.53873	9.65422	16.2327	13.2502	18.0787	11.686	11.9742	13.4458	15.5081	13.929	18.8553	11.1424	11.8189	11.1651
	Csa5G648680	0.00702652	0.0369468	6.87971	11.0684	19.3455	10.0059	24.5183	20.5003	7.26062	11.5567	22.6792	10.3656	14.197	11.096	5.16272	5.87453	16.1419	15.0113	10.5209
	Csa5G469030	3.36e-05	0.000433672	12.0811	11.2583	13.02	18.8626	15.4895	12.8547	9.9425	10.1638	15.6932	14.6723	13.0688	10.885	11.4439	10.8677	14.0915	14.4792	13.5924
	Csa4G296310	0.00706713	0.0370941	11.7717	13.6299	10.389	9.34909	11.1411	9.25749	14.4907	14.0816	12.4858	12.8843	10.857	18.3805	14.8121	19.9165	11.4826	11.5515	15.9951
	Csa3G646510	2.3e-07	5.19e-06	10.364	11.8267	7.78705	7.2149	8.57658	16.525	21.4834	18.4927	6.02638	10.5588	5.56467	16.1642	18.0807	31.5357	7.22274	10.9133	14.6733
	Csa5G608530	0.000755907	0.00611557	12.9766	15.3805	13.8993	16.2085	16.1599	12.2912	8.28801	8.92797	17.8409	14.528	12.1755	8.83745	12.4897	9.42396	15.5027	14.6865	13.4963
	Csa3G736770	4.22e-07	8.96e-06	11.354	9.4098	14.1282	19.6947	16.9148	12.9661	7.74712	6.46217	16.3441	17.1156	14.1995	12.4418	9.67627	10.4499	15.1347	14.9799	14.0961
	Csa3G078250	0.000359933	0.00328074	12.3076	10.2182	10.5423	7.65297	8.85528	13.5167	15.364	18.9795	13.1928	11.519	13.4423	14.3858	15.2413	19.6542	14.3556	11.4553	12.6321
	Csa7G450470	0.00479366	0.0274918	16.9063	15.7806	15.9407	16.305	12.8845	13.0191	11.4596	16.3176	10.9601	11.452	11.3158	10.877	15.1241	12.042	12.0573	10.6308	10.4176
	Csa4G621220	1.08e-09	4.21e-08	7.6048	12.0356	17.875	15.6182	21.6219	8.88023	11.8836	5.02128	20.4027	19.0196	14.5228	4.46332	5.67871	3.32669	19.2304	22.9814	13.555
	Csa2G416080	1.11e-25	2.98e-23	27.5032	24.3994	6.41139	9.03961	8.04057	18.7588	20.6143	29.0266	4.57789	7.1468	8.09346	15.2833	18.2796	20.5459	1.97969	2.72192	1.43577
	Csa4G169490	0.00563466	0.0312619	12.775	14.4576	13.5138	12.0604	11.9724	15.165	12.4141	12.6646	13.0333	13.7106	13.9706	14.8218	14.1042	13.5169	10.893	13.4106	11.5508
	Csa7G452940	0.000365415	0.00332131	9.24309	9.72868	12.6222	13.5953	12.9731	12.8446	5.96185	9.33102	15.6473	13.7905	14.1029	14.6525	13.1854	14.8234	18.4335	18.5438	14.7213
	Csa3G592690	0.000127602	0.0013756	2.63663	18.5382	18.5699	5.23418	19.1779	5.11933	5.27856	2.74476	13.336	17.0332	19.0996	1.98581	1.91835	2.92657	28.9201	36.5872	25.4687
	Csa2G176700	2.58e-08	7.27e-07	12.7976	6.9675	18.8104	11.5498	21.8264	9.16149	9.20273	9.71539	20.5135	16.6562	17.9522	3.96338	3.33084	6.08873	13.0221	22.103	20.9981
	Csa2G356650	6.64e-07	1.34e-05	10.7036	11.0088	9.81978	10.4777	9.81471	14.867	13.1846	13.5602	11.4927	10.8433	9.97873	19.5058	15.7042	20.1567	14.113	14.6365	14.7927
	Csa3G854180	1.46e-05	0.000208601	8.72864	9.89875	14.7754	13.1143	16.4154	13.6895	9.6738	6.24284	18.0074	15.3084	11.8389	9.16918	14.0837	11.1193	16.1927	19.8057	16.8586
	Csa7G432460	0.00808885	0.0411104	8.20355	11.5046	14.3959	11.6043	15.0214	9.16322	6.94306	13.6751	12.6596	12.9592	17.3355	14.216	11.8915	12.9368	13.9143	16.4237	22.2156
	Csa6G445190	0.00594641	0.0326214	1.82857	5.68741	8.44625	2.23226	8.79098	10.7271	10.7589	13.8031	22.5423	19.6865	17.7661	11.2921	12.7265	16.8039	19.5928	23.5361	19.0867
	Csa3G146610	0.00302183	0.0190231	14.047	13.5653	12.2638	9.5907	12.5368	11.8082	16.4131	14.1099	9.81897	11.8504	12.191	12.8884	14.9715	19.2602	13.9455	14.8079	11.6532
	Csa6G079800	0.00961284	0.0467382	15.5431	12.5533	13.9619	11.9385	12.7047	13.2806	14.779	15.9956	12.2421	12.5899	12.5356	11.8756	15.4302	13.6331	10.2416	14.1318	12.3091
	Csa1G668000	0.0064341	0.0346392	8.25406	11.8683	9.93727	7.50599	8.90891	16.2084	15.3415	7.80968	11.8841	10.6158	7.56953	15.8964	22.2354	22.8153	16.6231	17.8442	15.0267
	Csa7G066220	0.00669473	0.0356897	15.2086	13.9846	12.5711	12.905	14.684	13.6254	14.7502	14.4719	11.368	12.6405	14.2162	11.9544	15.8934	12.9239	10.6718	12.9909	11.6662
	Csa7G374690	0.000232669	0.00229646	10.3144	9.54673	13.9289	15.0814	14.0387	15.073	9.19372	7.37738	16.3529	14.1598	11.001	11.8179	13.7752	12.3015	18.2687	17.1898	17.4457
	Csa3G635870	7.7e-25	1.91e-22	13.5012	16.3711	7.87083	7.12182	6.88602	18.5374	18.7386	12.6367	10.8992	10.0322	10.5119	23.327	19.3185	18.8595	11.1968	9.95832	11.3464
	Csa6G500590	0.000752752	0.00609425	5.07268	9.63707	9.64516	6.98385	10.5936	9.08118	10.0615	8.44721	14.7412	12.0317	14.464	18.3524	12.6457	13.9686	21.547	26.7654	23.5154
	Csa1G697530	0.000110367	0.0012186	14.3559	13.9475	11.7615	12.5044	11.3777	15.0585	12.1154	13.5846	14.6018	9.84226	10.6358	16.7542	14.1264	16.6933	12.8419	15.191	12.4206
	Csa6G513670	5.92e-06	9.39e-05	20.0198	23.2535	9.20385	7.92388	6.97843	12.9416	11.3966	13.3698	10.243	9.36128	8.162	10.5776	18.2181	25.9544	17.8615	12.9021	9.70718
	Csa3G121040	0.0102734	0.0491107	16.2634	13.04	15.708	13.7523	12.8336	11.7764	14.7615	12.1796	12.9277	10.9045	11.2843	15.5577	16.0543	13.4698	11.7806	12.0876	13.6979
	Csa2G115750	0.000393198	0.00354008	2.35047	5.1154	7.63115	2.98479	7.46664	9.87928	10.235	11.8576	20.7089	17.7852	18.9464	10.9185	12.3759	19.0447	20.2223	30.7438	19.904
	Csa2G000920	0.000262716	0.00253915	3.22142	8.30198	15.6148	6.15847	15.9185	8.85471	10.0242	9.6352	18.3986	7.97904	15.3715	11.3634	11.8429	10.092	28.7072	30.6843	16.2522
	Csa1G709160	0.00532037	0.0298922	6.18076	5.12125	11.5763	10.1543	13.2939	12.6993	7.47802	18.7131	19.3314	15.2963	17.8033	16.2141	9.24135	12.6821	12.6219	23.6266	16.4438
	Csa6G148260	4.7e-07	9.85e-06	8.95683	7.28715	10.6826	14.9565	11.1289	8.14483	7.8259	11.1735	17.1447	21.9183	13.72	6.06888	8.56506	13.8477	24.3489	20.0806	22.8894
	Csa2G223160	0.00287922	0.018338	15.7192	16.12	15.9257	16.1461	11.2885	13.6515	12.0551	18.6807	11.6269	11.3804	14.5848	16.0059	14.35	12.8148	12.0192	6.49111	10.0412
	Csa3G825040	0.00446163	0.0259229	17.0962	16.1967	14.1991	13.944	13.4022	14.9159	13.4014	10.4663	13.3049	12.698	10.6849	12.8595	14.4003	13.2701	13.485	12.7281	12.0762
	Csa1G009870	0.00520222	0.0293293	5.72652	8.64791	10.5166	5.82722	10.3496	11.3055	10.3706	11.0277	11.1509	16.6501	16.5813	11.5684	17.3761	10.0746	16.6811	29.4591	25.9371
	Csa2G348840	0.00836885	0.0421819	10.0608	10.5297	11.9726	11.9462	14.5241	13.6202	10.0831	13.7036	16.3692	14.0217	16.3634	12.0938	13.2432	13.5158	15.6126	17.8047	14.1868
	Csa7G420160	0.00191058	0.0130959	8.08062	15.4237	10.7827	7.88633	7.80487	18.2932	23.1893	11.7199	16.4611	13.2921	8.63549	16.4668	19.4227	13.7071	12.6668	12.8687	12.9826
	CsaUNG021720	0.0073894	0.038332	18.3794	16.2078	14.0483	14.578	11.6715	15.0786	11.4028	16.1675	11.2426	12.8609	16.4193	11.6812	15.3193	11.7224	10.7523	11.7115	10.7476
	Csa3G740800	1.46e-08	4.35e-07	7.72528	8.24631	7.4736	6.31137	7.29924	15.129	15.3198	12.6869	7.48958	6.85589	6.09991	23.7998	27.3723	35.1165	13.3499	17.7295	12.213
	Csa7G207020	0.00460877	0.0266075	11.4358	12.7175	14.3877	13.9724	12.1339	12.5887	11.5533	8.22566	15.2505	13.908	11.8079	14.1339	13.2196	12.4113	17.495	17.0132	18.0249
	Csa7G062900	0.0104905	0.0498986	15.2421	14.5722	16.2505	17.0875	15.1667	14.3014	9.00538	9.07262	15.1826	13.3523	14.0969	12.5395	11.63	10.0552	16.4735	13.6711	12.6368
	Csa5G174630	0.00157389	0.0111764	20.1749	15.5738	15.4015	17.9213	14.0988	13.8192	13.9377	13.8228	11.2338	13.7752	13.3668	12.1145	14.8553	11.0402	11.6349	8.94992	8.65988
	Csa2G000310	0.00716317	0.0374745	8.48636	11.1503	14.7372	9.22271	11.4938	11.4552	9.08984	9.84666	14.1438	12.5423	13.7123	15.3424	14.2263	15.2452	17.0577	23.0946	19.6515
	Csa6G496990	0.00315716	0.0196681	9.74507	8.73746	12.7136	12.669	9.93355	9.51757	9.86193	10.791	9.69295	17.1185	14.1886	13.7259	13.0728	16.789	18.5923	23.3641	20.6793
	Csa3G251900	0.00867204	0.0433579	21.1136	20.138	10.3724	12.9044	19.1931	15.7871	19.0253	12.9423	11.8136	8.95828	8.97121	12.4038	13.353	8.65481	13.1731	9.31018	13.0901
	Csa3G728060	5.3e-05	0.000645295	10.0083	11.2556	12.0883	14.4819	13.8114	13.5123	7.56491	8.43457	17.1594	16.1688	12.7626	15.4745	12.5665	12.3371	20.9972	16.3581	16.9651
	Csa4G507960	0.00383299	0.0228911	16.7502	13.4562	13.2102	13.5457	12.7141	16.1907	12.3641	10.4217	13.3134	13.0358	12.4202	15.0943	16.3345	14.4968	14.2317	13.6496	11.1787
	Csa6G419510	1.72e-06	3.17e-05	32.8211	64.3333	8.69607	10.0528	11.9751	13.2858	17.099	33.8032	2.12645	2.64408	13.7769	4.80309	3.45577	5.81603	3.74224	3.05623	1.76257
	Csa3G844910	0.00965755	0.0468903	6.63734	12.3604	10.6894	12.0013	12.6236	15.5901	9.52932	3.86124	21.8926	16.9833	8.50349	15.6731	13.2462	9.11017	23.9549	22.6938	18.5271
	Csa1G045480	0.00545413	0.0304374	7.98619	14.5049	19.1633	11.1539	15.5931	17.7951	13.0352	7.01669	17.9961	18.8209	12.5717	10.2587	10.5319	6.73069	12.7935	19.1211	18.8093
	Csa2G302150	0.00254684	0.0166036	13.2346	13.5238	14.4334	16.9784	14.9049	13.1625	10.9023	11.0025	14.2176	15.0296	15.1962	12.7447	12.7856	12.1423	14.0126	14.971	14.9171
	Csa3G124750	3.38e-10	1.46e-08	15.0028	14.6333	11.4128	9.48408	11.8648	16.7429	16.1653	10.8177	12.429	10.303	10.6077	17.2536	19.9028	19.607	13.2891	13.2019	11.7125
	Csa5G652270	9.39e-05	0.00105587	4.69429	8.40951	8.46298	7.40989	9.2574	11.585	8.02746	10.2939	17.3479	17.6008	14.7509	16.5121	11.9676	18.7131	22.5599	24.6701	22.2307
	Csa3G010060	1.03e-11	5.69e-10	7.04992	13.4971	33.5903	23.6421	35.0244	4.98692	6.31378	6.72327	25.5365	14.5882	32.3191	2.47634	1.8796	3.07726	14.9536	3.74568	5.36586
	Csa1G089500	0.00168804	0.0118386	15.2362	16.5879	11.8952	9.95409	11.3021	20.1959	15.0915	6.65094	12.9036	11.6436	6.86667	21.279	18.38	14.7596	16.8418	13.8911	11.7302
	Csa3G822220	1.57e-07	3.71e-06	10.1604	8.48085	17.3389	13.0371	18.5575	10.9172	10.955	10.7456	17.0296	16.4457	14.1814	7.24194	10.9861	10.5149	14.7743	23.6659	20.1858
	Csa1G039890	3.73e-07	7.97e-06	11.9124	11.7731	8.68006	9.53043	10.3857	17.1875	11.9661	12.813	11.7324	13.5512	11.931	21.1494	19.8942	23.3743	14.0022	14.026	11.491
	Csa3G731790	2.32e-24	5.47e-22	18.8466	19.6073	11.6914	10.7327	10.1922	17.7481	17.5709	17.4413	6.8988	9.6826	10.0026	17.9843	23.0551	21.3204	8.83143	7.03489	7.09394
	Csa5G623880	3.89e-06	6.52e-05	8.62325	7.44841	13.6168	11.7098	13.6639	15.2005	11.1953	7.53986	18.9889	14.5135	15.6452	14.0642	12.9537	12.6384	17.8785	23.2466	17.406
	Csa7G014590	0.00220455	0.0147763	9.30695	10.234	13.2064	13.1722	11.1529	13.2223	12.0984	6.45999	17.0701	15.3148	11.0105	14.0276	13.9493	14.8841	22.0918	17.3959	21.7946
	Csa3G143540	0.000950369	0.00740604	8.10594	7.82859	7.47428	7.01971	7.6149	11.182	10.4852	13.4085	7.90999	12.9243	10.1015	41.3164	26.5636	22.2366	12.8731	12.8982	16.7884
	Csa3G814370	0.00266965	0.0172685	12.6623	8.22856	12.8536	12.6557	16.3463	8.90517	8.95265	12.4192	12.1018	15.344	13.4095	11.9304	14.0443	15.2888	16.5972	22.0777	23.1268
	Csa3G015890	9.25e-10	3.68e-08	4.65271	8.59053	11.3838	7.75137	11.5729	10.2326	8.29087	4.78456	19.5917	17.2327	16.7225	10.4488	10.2589	9.23179	20.1308	35.783	30.3916
	Csa1G075020	0.00358195	0.0217099	12.7093	13.6943	14.7938	14.4954	14.523	15.1215	8.76941	8.24871	19.0395	14.7703	13.0839	13.287	13.597	11.0091	18.8158	16.4079	14.7053
	Csa1G044900	1.09e-09	4.22e-08	22.4009	30.0748	12.4605	10.1648	15.876	22.5598	35.776	23.9631	9.99521	9.56022	12.0731	6.87425	11.9183	3.77664	5.13238	3.09412	1.84107
	Csa7G064000	0.000863039	0.00682875	7.84481	9.41596	12.3446	12.2372	11.292	13.2479	8.63882	8.53338	20.6738	15.1002	12.518	17.4364	11.4643	17.1617	24.1266	16.7004	19.1134
	Csa2G348970	0.000252757	0.0024591	9.79194	12.125	13.1969	13.084	14.8493	14.0484	13.2992	10.4399	16.8639	15.6314	13.2516	11.1804	11.6495	11.5188	17.6779	22.5211	16.722
	Csa1G084330	0.000203964	0.00205353	9.4252	7.01879	10.7241	15.1191	11.1437	11.3479	7.67612	9.26443	16.8958	17.2605	12.3276	17.233	13.4385	18.9561	21.3008	19.7181	19.1979
	Csa7G430130	0.000224997	0.0022323	4.7279	5.72768	11.665	6.97411	12.4601	9.08427	8.57386	16.2744	17.331	15.7679	16.122	11.9307	12.4962	18.1592	19.4116	25.6514	25.7984
	Csa6G128550	0.000206921	0.00208001	17.9667	16.0733	16.7284	13.9221	14.4365	15.0585	15.6871	17.1141	11.6003	12.8805	13.6386	12.2116	12.47	15.024	12.1068	10.1201	11.3486
	Csa1G073740	4.51e-14	3.48e-12	15.5531	16.5541	10.5279	8.506	13.5746	16.708	16.2227	18.5853	9.592	10.3425	11.9104	19.9254	19.6838	22.5399	9.44045	9.35121	9.60233
	Csa6G067980	9.76e-16	9.59e-14	10.3091	7.23294	13.7861	19.7653	15.6352	9.17476	8.56086	8.69414	20.6654	23.7498	15.6713	11.8403	6.80458	7.77898	19.0736	19.4089	20.657
	Csa1G303700	9.07e-12	5.06e-10	9.2084	9.15788	20.516	16.9105	18.474	15.6443	6.62582	6.50357	26.7329	20.355	14.8388	6.65603	8.85778	4.49034	19.0585	18.7749	16.0628
	Csa4G038810	1.82e-08	5.29e-07	10.5669	15.2678	9.54905	6.98683	8.66487	21.0025	17.8764	15.6117	10.9325	9.23322	9.79562	19.004	19.9513	17.6619	15.9533	18.0085	13.1739
	Csa5G139430	1.55e-21	2.85e-19	3.54208	5.68006	20.2607	17.6595	26.0874	9.48263	8.68251	5.2093	22.9706	18.3965	23.9384	6.11562	6.70844	6.7532	13.5708	24.5684	19.76
	Csa2G338830	1.41e-10	6.54e-09	5.42579	9.14503	12.4	8.63115	12.1486	8.86947	7.84655	7.18297	16.6277	15.2369	14.1954	10.6527	9.38154	11.5167	29.2318	37.6528	23.2766
	Csa6G538630	3e-08	8.31e-07	8.5543	10.7801	11.9256	12.2209	12.6919	12.8485	10.5302	10.4525	18.8637	14.5809	16.3343	14.8512	11.2958	12.2071	19.9203	21.1552	20.2317
	Csa3G822470	8.11e-05	0.000933766	11.516	14.976	6.78896	7.04495	10.1943	25.2249	14.6092	17.1033	17.4738	4.50374	5.83814	20.7548	26.4477	17.5246	20.4548	11.8192	7.32047
	Csa6G452670	0.000761435	0.00614986	6.37697	12.3133	14.9317	8.31206	15.9604	12.8297	12.672	10.4261	16.7824	14.6964	16.1782	9.45506	11.4173	13.0347	19.1701	22.279	22.8097
	Csa2G162150	1.17e-07	2.85e-06	7.50677	9.89502	16.7549	11.614	17.3331	14.0738	10.5874	7.15004	18.5234	15.5881	15.0098	11.3686	11.2787	12.8308	18.854	24.3241	17.4173
	Csa2G215500	0.00528363	0.0296945	14.8982	15.5262	13.8514	11.59	12.7347	17.6612	16.2528	10.7636	12.2366	12.4902	12.0501	14.8761	15.5067	14.7888	15.1281	13.9682	15.93
	Csa3G902190	0.00497265	0.0283184	5.91863	8.3034	11.4069	8.36521	9.54535	13.6138	10.9349	5.70518	16.7078	14.1552	9.10831	14.6205	17.3281	17.4085	30.3011	26.6684	20.509
	Csa4G606030	0.00548748	0.0305878	21.6935	17.364	16.915	18.1556	15.2178	15.3692	14.9827	16.3944	14.468	13.5779	15.5286	10.3442	11.9408	10.0206	10.7989	10.441	7.51965
	Csa4G285800	6.05e-21	1.01e-18	15.0546	21.8436	8.66846	9.1309	8.50722	14.8779	16.4326	25.0908	8.16439	6.46024	9.63424	21.5453	23.6659	24.6141	10.9957	7.65391	8.47835
	Csa2G021550	0.000433114	0.00383963	11.1139	11.1654	10.2165	8.2826	8.97583	16.423	13.1013	19.802	12.4757	10.4978	13.7325	22.4487	13.7686	22.9906	14.2772	14.7245	16.9261
	Csa2G361660	0.00051417	0.00443051	10.0537	11.4551	13.6551	11.5414	16.9862	12.4876	9.84874	10.0641	16.2894	19.3701	17.4735	13.7803	15.1603	14.0142	15.0291	17.3747	16.4295
	Csa6G127400	0.00180547	0.0125286	10.3559	12.0688	11.1309	14.1316	11.7632	12.7754	7.85731	6.69973	18.6511	15.8012	13.3123	16.4384	13.6065	15.9385	23.7849	17.0712	19.6859
	Csa2G020990	4.15e-10	1.77e-08	15.2598	17.9321	9.57855	11.1814	11.9528	20.9269	13.5342	12.458	14.3939	12.56	11.1467	22.4382	18.8628	17.7622	9.815	11.415	9.8775
	Csa2G351550	0.000166473	0.00171593	12.3617	12.2849	12.6849	12.8205	11.1416	13.876	18.0183	15.7663	10.8476	10.9186	11.4606	18.1681	16.0185	23.966	15.3147	14.0912	11.4541
	Csa5G148610	0.000164446	0.00169871	10.1159	13.5865	16.2627	15.2944	19.8043	14.3898	14.4258	11.2424	15.9264	18.738	16.983	8.40106	12.7257	8.96094	15.8824	15.2584	13.3195
	Csa4G279870	6.2e-34	2.88e-31	21.4523	35.7149	5.73783	4.80993	5.72096	16.0296	19.8199	25.5824	3.68153	6.17574	6.74098	17.0262	26.3313	35.4056	4.17036	3.83228	3.13292
	Csa1G045860	5.19e-07	1.07e-05	7.25937	10.6253	12.5058	12.6443	12.2477	15.4012	9.17781	12.3257	22.3349	22.1681	15.765	12.5277	12.4018	11.776	17.7307	16.8694	17.6951
	Csa7G017720	1.06e-11	5.88e-10	8.69955	9.29404	26.6074	17.8679	22.5098	14.5529	5.96425	7.816	21.7079	12.7419	21.0255	8.18386	5.38036	3.92224	18.1939	20.1312	16.9474
	Csa5G630820	0.00319794	0.0198508	10.1454	13.734	9.78361	8.43051	8.00735	14.7217	7.75304	13.679	11.8975	10.2407	9.74105	20.1876	19.4511	29.4339	18.6872	21.1601	14.648
	Csa2G012150	0.00216732	0.0145677	11.4974	12.7028	14.7264	16.7222	14.6559	15.9324	9.25853	6.50026	19.5453	16.1338	11.9405	15.1118	13.6459	10.3357	19.0013	17.1756	17.0486
	Csa6G490800	3.54e-07	7.65e-06	15.1363	20.4588	18.928	24.747	27.9755	8.37245	6.38023	11.3891	21.0832	14.3505	24.6943	3.13634	2.57893	4.07459	15.1192	14.8706	8.98825
	Csa5G611090	1.17e-08	3.57e-07	11.2246	14.6586	19.5559	16.7882	17.9877	13.9242	10.3017	9.69404	16.7577	15.0701	18.4961	10.4841	10.5602	8.00023	16.1078	18.6432	14.8501
	Csa3G717370	0.007429	0.0384956	12.4685	14.7237	10.2467	10.0135	9.08702	14.3724	11.6339	15.2261	10.7939	12.8302	10.6817	15.4124	18.1004	21.8863	21.1282	20.4368	14.1166
	Csa6G517250	0.00840914	0.0423097	6.15137	8.11783	8.11718	7.48278	7.271	14.7313	12.8681	15.3537	10.9593	12.6579	11.8	27.2058	18.6003	25.727	17.683	19.5263	19.0164
	Csa6G087870	1.3e-19	2.01e-17	9.67075	7.51601	15.9264	21.7676	17.9204	9.10603	5.96172	10.3921	17.9241	17.8897	18.9352	6.50801	7.48598	6.89732	23.4765	25.1368	20.8129
	Csa2G000960	4.01e-05	0.000505236	9.61427	11.7691	10.4383	9.4452	10.1804	11.8343	13.1061	15.9522	9.86009	9.39999	11.3795	24.0657	21.051	31.3314	14.6849	16.0631	13.7855
	Csa1G533400	2.01e-05	0.00027841	9.26804	11.5932	10.2408	8.2709	8.6537	13.7257	16.2282	16.2507	13.2446	13.5777	10.8552	23.6818	20.6827	20.2998	14.7027	16.1961	17.2659
	Csa6G133820	0.00117785	0.00883222	11.9614	9.78818	8.42718	5.56407	10.653	15.1437	14.8756	21.7863	14.0923	10.9242	15.6852	21.2286	20.0517	21.264	9.58782	17.1057	16.6191
	Csa5G211530	0.00166899	0.0117266	6.44975	9.94043	12.8999	10.1837	10.4976	14.7094	9.92118	6.70637	17.9017	12.9114	11.6671	16.1481	16.0792	17.3712	23.0647	26.761	21.8394
	Csa6G134390	4.81e-09	1.62e-07	3.49848	9.83742	16.5043	8.53804	25.0644	5.92947	7.27086	8.55036	21.614	16.6174	28.1979	5.30185	8.53135	9.22381	14.1694	36.7417	19.923
	CsaUNG031640	2.54e-08	7.2e-07	6.48547	6.42839	10.2722	12.2705	9.49424	11.9166	10.8782	9.41659	19.3991	16.3201	11.7673	17.8719	14.6764	14.0644	25.0007	22.6272	27.0593
	Csa2G270210	0.000574357	0.00487305	7.05128	11.8762	11.6642	9.06866	15.6913	14.7525	9.57851	10.195	18.957	14.8655	16.0121	15.6054	14.4444	11.0906	21.6861	25.3655	18.5294
	Csa5G591740	0.000641336	0.00536153	12.1434	11.1481	12.8362	16.04	14.2497	15.2317	8.86995	7.451	19.9203	16.2305	13.7869	16.5367	13.648	12.8281	19.5663	19.0125	17.0041
	Csa1G599400	0.000159632	0.00165796	13.3551	15.4777	10.9416	10.9108	11.8788	17.5184	12.0798	16.6401	14.7247	13.2181	15.6241	17.9127	16.6619	19.9185	11.604	15.1206	13.0117
	Csa1G524760	7.31e-08	1.87e-06	9.92462	10.2716	13.8545	13.7165	15.3678	10.4634	10.5661	10.1994	17.455	13.3075	14.3645	13.4089	10.536	12.7442	27.8729	18.5608	23.9947
	Csa2G372800	1.3e-08	3.95e-07	6.13968	11.5205	12.246	10.8883	13.8441	13.0447	8.88752	8.19308	20.4248	18.0311	16.5297	12.2368	12.4427	12.602	20.0129	24.6871	24.9265
	Csa3G176860	0.000281987	0.00268995	17.0893	13.903	15.3284	15.4139	12.4881	13.3034	13.1134	16.7065	11.3892	11.055	11.9333	17.5462	18.7256	16.8328	16.0466	12.2981	13.6131
	Csa1G086920	0.00732079	0.0380589	12.0341	13.0596	14.9618	14.8058	13.3342	15.939	11.1484	6.81948	18.7708	17.4291	12.5286	14.7978	14.9815	11.0101	18.4969	18.4047	18.3259
	Csa2G373450	0.000427128	0.00379539	21.568	17.599	19.759	19.3338	18.1279	15.6661	17.3318	15.3534	11.0387	12.974	10.9627	9.90428	13.378	14.762	10.4378	10.5202	8.2182
	Csa2G348210	0.00373136	0.0224222	14.5835	14.2068	15.7568	18.7355	14.3013	13.7216	11.7346	9.85613	16.3168	15.0669	14.8291	14.8698	12.9508	11.8314	17.4662	15.2758	15.7189
	Csa6G422810	0.00954166	0.0465067	19.9456	16.6202	15.7443	18.7182	13.1732	17.8357	12.4354	16.4745	15.4555	13.5956	18.5074	14.3924	12.623	12.4695	10.5992	10.0636	9.37147
	Csa5G352090	0.0070789	0.0371355	9.02522	10.5984	19.3022	17.0536	21.8383	11.2736	14.8902	14.341	18.1832	18.7822	18.4511	8.1434	10.8952	15.0143	10.0451	16.9058	13.296
	Csa2G139300	3.3e-15	3.04e-13	17.3525	17.7311	11.0802	12.9893	10.848	16.2129	14.6187	14.8356	11.2603	14.0152	11.8121	20.2668	18.7626	20.321	13.2973	11.6495	11.2686
	Csa6G411300	0.000110694	0.00121886	17.1383	16.4382	16.1779	13.578	15.1299	17.1589	15.1222	14.9715	14.4274	14.0861	13.764	13.9188	15.6208	14.9433	10.9692	11.9663	13.4315
	Csa3G697970	0.00156482	0.011129	11.6088	16.408	18.4212	17.8621	22.6807	12.6706	12.3592	13.1321	16.8927	13.8838	15.3447	10.8167	8.43479	12.5114	16.1561	15.2004	14.503
	Csa2G000150	0.00505566	0.0286583	13.8427	13.3266	13.7573	17.5579	16.2584	15.9166	12.1139	9.24928	17.1241	17.2678	14.0494	13.114	14.4343	11.6763	16.7364	17.2953	15.2286
	Csa3G731150	0.00169112	0.0118558	22.9099	21.0331	20.0497	16.2213	17.0122	18.8426	16.2145	10.2165	14.0767	12.7908	10.3155	12.3309	16.0406	9.75114	12.6383	9.93942	8.57638
	Csa5G148590	0.00290461	0.0184381	15.1907	15.8115	11.9989	15.3252	10.9688	14.3475	12.1228	16.8961	12.0635	15.8553	14.0394	17.2957	15.8168	20.7396	13.341	12.9349	14.2757
	Csa5G434550	4.51e-08	1.2e-06	10.1614	9.71482	12.1082	17.9869	18.1619	10.7315	6.14839	17.1418	20.4809	26.4227	23.4759	8.18365	7.94814	7.1674	17.4759	18.4193	17.7389
	Csa4G011660	7.76e-06	0.000119873	9.24432	11.3817	10.4539	5.86617	8.18801	16.0586	16.2287	16.2241	10.309	12.6479	11.3271	23.4272	20.934	27.1714	14.3429	16.5945	19.2434
	Csa5G633190	0.00232887	0.0154574	12.7978	16.4461	12.5744	14.1386	14.1643	15.3688	13.836	18.9533	13.191	12.2611	13.5396	14.9984	14.8113	23.7212	13.3672	12.2158	13.294
	Csa1G575010	0.00349668	0.0213166	19.0203	17.9138	13.9989	16.9956	16.2758	18.3742	12.4965	10.9939	14.1792	10.2589	15.3279	15.683	14.2292	19.5178	10.6466	11.0982	12.7473
	Csa6G153500	4.08e-06	6.78e-05	11.167	10.0501	13.1933	13.7035	15.6936	15.0832	11.3298	11.1022	17.7204	16.7903	14.4236	14.2488	14.0498	14.8841	19.2742	18.8046	18.3913
	Csa2G372190	0.00385063	0.0229748	11.6616	12.536	12.7409	14.1121	13.4056	13.1896	12.1557	10.189	17.7152	16.5957	14.0919	17.6623	14.7546	14.4492	17.7918	17.619	19.4101
	CsaUNG008290	2.21e-20	3.54e-18	10.051	10.7515	18.4551	15.5052	17.3609	10.9232	9.93225	9.92073	18.9661	15.5854	15.7202	13.2723	10.5973	10.1882	21.4366	21.7102	19.9167
	Csa3G664580	1.34e-07	3.2e-06	14.1706	16.1104	8.35387	10.8071	10.8831	15.131	13.5525	18.423	14.5139	9.715	10.3363	23.8903	17.0573	22.486	15.0191	17.0809	13.3417
	Csa3G890060	0.00235705	0.0156228	15.0687	14.5241	14.4993	13.4655	14.8557	14.3519	13.9738	19.2929	13.6114	10.9735	14.2596	16.3692	18.3158	18.2629	12.1094	12.9188	14.0318
	Csa6G157640	2.05e-07	4.69e-06	11.9778	14.7382	18.3294	20.4711	15.8904	12.648	10.4692	9.66457	18.2875	16.7923	14.6731	12.1458	11.9836	13.1276	17.7047	15.0953	17.3966
	Csa3G681670	0.00464617	0.0267667	18.1644	17.5565	16.4039	14.8514	13.3112	15.7748	14.6964	17.6999	12.95	14.1137	17.1323	14.0044	13.9896	13.6386	12.2476	10.9005	14.0082
	Csa6G526310	9.04e-07	1.78e-05	21.3398	18.7508	18.0536	17.2514	14.34	16.8036	13.7371	16.0513	14.2145	13.629	13.353	14.2569	15.5592	11.9772	12.0764	10.5981	9.75969
	Csa7G407600	6.64e-05	0.000786175	18.2598	14.4857	15.2112	15.5044	12.72	16.1808	16.5012	16.0997	12.9579	13.5192	16.6196	15.8052	16.7048	17.4298	10.3008	12.4417	11.552
	Csa7G219250	0.000385798	0.00348497	20.2877	17.9422	15.2078	15.1386	10.1856	17.3273	8.75803	15.524	12.7501	10.1742	16.0291	20.3942	16.925	23.0513	11.1076	11.3056	10.2399
	Csa6G445000	0.00473037	0.0271861	12.5137	11.5724	10.9009	10.1391	10.7234	13.4783	14.6551	20.5818	12.4335	13.37	10.2696	23.5496	16.8086	23.0449	13.2041	12.3807	22.9681
	Csa1G027500	0.000131835	0.00141472	9.28439	8.99129	12.936	16.3388	14.1369	17.3646	13.0927	6.23591	24.1035	18.5025	13.6564	15.7115	12.4371	9.63755	21.4481	20.0927	18.6368
	Csa3G634290	5.17e-07	1.07e-05	5.5303	11.8923	28.458	16.1274	47.8402	13.6202	9.73538	7.50436	16.9097	15.6713	25.1341	2.51796	5.87835	5.24945	9.34787	12.1184	19.1522
	Csa3G238740	1.38e-09	5.2e-08	10.8144	10.0478	17.5103	14.7105	18.4257	12.2575	10.4618	11.4367	21.5012	17.1731	19.7433	13.8892	12.9812	8.683	15.1776	19.5585	18.5874
	Csa5G139450	6.85e-15	5.91e-13	13.1619	19.7444	9.83811	9.09378	10.9772	18.0579	16.635	17.5706	13.0717	8.85578	10.0803	23.1995	19.4726	25.247	15.154	11.1894	12.0911
	Csa3G874320	1.81e-41	1.44e-38	20.5248	24.3253	8.16021	9.79681	8.90242	19.8656	20.012	23.4594	9.42099	9.25163	8.7705	20.2405	26.1675	24.2225	7.14635	5.65306	7.56485
	Csa2G006070	0.00619164	0.0336665	20.3319	15.7445	23.2767	21.7546	17.8129	11.9539	9.79205	10.2158	16.4867	13.2821	17.8104	11.3417	13.4784	7.77107	16.516	14.7137	11.2433
	Csa3G782620	0.000265627	0.00256208	6.46844	8.7855	13.5526	6.9442	15.8275	16.0606	9.80825	7.09959	21.5367	13.9647	14.7408	11.271	15.6705	15.6314	21.8392	32.0948	22.4977
	Csa1G038910	0.00012194	0.00132495	12.8209	12.4636	16.8969	17.2172	16.948	16.2847	9.81247	5.57848	21.0208	19.5861	11.9441	12.293	12.8408	10.2568	21.8276	18.6964	17.308
	Csa3G624080	7.85e-09	2.49e-07	16.1594	16.0843	9.75265	16.119	12.2682	17.7783	17.09	16.3518	10.423	10.1685	8.44519	29.2865	21.7215	23.8464	7.89498	7.14243	13.3176
	Csa3G354490	1.72e-06	3.17e-05	21.0138	16.3545	17.1598	15.8707	15.6583	13.6083	16.4268	16.616	11.8478	11.0185	13.2064	15.5853	20.0958	18.5771	11.569	10.6504	8.70446
	Csa4G308590	0.00263287	0.0170537	6.58563	16.0044	9.29537	3.76348	8.88492	20.5142	18.5693	10.5504	14.7877	8.26918	8.61376	20.7768	22.7359	27.5985	20.1786	19.7147	17.3758
	Csa1G042240	0.00971634	0.0470973	14.5931	14.0114	14.895	18.529	17.8735	17.1785	10.6935	7.4742	19.7267	18.3402	13.8901	14.4444	14.1774	9.80025	17.8134	16.5692	14.2418
	Csa4G593900	2.46e-05	0.000331891	29.0487	25.5545	18.8837	16.7089	16.1646	13.6998	21.4511	19.3533	11.7891	11.6773	13.7754	8.96795	17.7085	7.03873	9.52586	7.26318	5.79042
	Csa1G033070	3.01e-08	8.32e-07	12.5301	14.1784	10.0234	10.2459	8.21911	16.2458	13.265	23.2876	9.17992	8.99843	9.17554	28.8394	22.061	44.0057	7.10068	6.0652	11.2622
	Csa5G292220	0.00150502	0.010781	3.92362	14.0546	11.4699	7.61229	12.6697	14.8586	10.5373	4.1018	24.7206	23.5488	13.5703	7.18633	11.1732	6.88321	28.2612	35.2149	25.0195
	Csa1G025820	8.39e-05	0.000958631	4.24927	6.4933	2.08753	5.07715	5.99932	15.5213	17.2397	8.83363	12.9075	10.0402	5.74899	37.4006	33.5021	44.9623	13.1963	16.3754	15.4437
	Csa7G388440	0.000264097	0.0025499	14.7883	18.2615	14.4261	14.0569	14.0148	17.1234	12.2737	18.4283	15.3945	14.9764	14.2329	17.0659	15.4558	19.4936	11.5969	10.8109	12.694
	Csa1G654890	0.00071324	0.00586493	25.2426	16.6681	17.1425	17.6233	13.6397	13.7748	17.1433	20.5453	12.3844	14.4088	14.3865	12.1476	15.8144	11.8643	12.2362	9.89385	10.2018
	Csa5G524750	0.00105795	0.0081053	15.0709	11.777	12.8415	7.83711	10.6609	17.2723	19.5429	34.1025	10.2768	12.167	13.4277	16.5695	15.8222	18.9601	6.56467	15.9208	16.364
	Csa7G039240	8.01e-06	0.000123276	16.9086	14.2893	15.5102	15.9549	12.7446	16.611	13.9101	15.9714	12.9851	12.4922	13.1478	18.5075	17.1415	19.1671	14.2378	13.1533	12.6643
	Csa2G196890	4.34e-07	9.19e-06	10.4204	10.883	16.1178	15.2249	21.3575	15.021	9.59412	6.72669	23.1256	15.2002	19.9159	14.5447	9.31206	8.67581	16.3009	26.0283	17.0842
	Csa5G649290	0.00967388	0.0469512	15.5824	13.805	14.0231	18.0141	12.3384	11.9231	17.4552	23.3601	12.5236	11.3926	17.0437	19.3634	14.463	19.2403	11.0741	11.3139	13.0993
	Csa4G004850	5.79e-07	1.19e-05	13.8606	11.5413	9.70641	9.78348	10.3467	15.6112	15.1088	17.6057	14.0948	11.742	13.5938	20.8401	20.7118	25.2708	13.6918	14.8332	17.8476
	Csa2G279230	9.11e-05	0.00102842	9.97006	9.04078	20.6516	15.9626	16.1334	14.88	13.4907	4.21993	22.4695	16.9718	9.86616	12.2158	12.4301	7.4556	26.9304	25.1931	19.2336
	Csa6G072990	0.00673734	0.0358267	10.6351	15.4789	11.358	9.79962	12.3964	14.5636	11.5581	14.6078	14.4655	15.1245	13.0109	22.3532	21.7033	20.5179	17.8718	15.7813	16.3995
	Csa6G406020	0.0028698	0.0182963	14.5016	15.685	15.0754	20.8677	22.7405	17.2704	12.0652	11.9987	16.9676	16.3416	17.6329	10.4833	11.7795	10.7747	14.2135	16.694	12.8449
	Csa1G600910	0.000358005	0.00327738	17.0688	15.5668	12.4916	13.7363	14.7665	15.2676	15.7061	20.9277	15.1113	14.2367	16.0353	16.2758	14.4602	18.053	12.7459	12.6437	12.8784
	Csa6G318710	2.31e-06	4.09e-05	10.3937	11.1937	9.13205	7.80147	7.72517	13.6218	16.2186	16.814	11.2374	14.6568	9.05481	30.9955	21.8282	26.4891	15.632	15.3557	19.8827
	Csa7G238430	0.00818875	0.0414744	11.6768	13.3606	15.5923	15.4811	13.941	14.5401	11.3734	5.68309	18.9793	18.1209	10.4658	18.4203	14.6593	10.8965	25.5852	18.3541	21.1627
	Csa4G652120	0.00117016	0.00878148	17.9367	19.5007	17.5838	16.6044	14.2019	13.3412	15.06	24.3274	12.579	12.9157	16.3756	14.157	13.7158	17.3584	11.4079	10.968	10.33
	Csa6G009420	6.35e-06	0.000100026	17.2456	15.6644	10.5977	13.4339	12.6937	15.9835	14.6552	15.4084	12.8077	12.8956	13.6264	21.4244	16.5354	19.7562	14.4452	13.6847	17.8422
	Csa1G015840	0.00149878	0.0107524	14.0698	14.4414	15.8977	16.3194	15.5844	15.0287	10.7641	10.418	17.9111	15.2947	13.5155	14.4219	15.9537	13.8358	18.443	18.411	18.5814
	Csa6G517950	1.29e-11	7.05e-10	18.9116	17.1049	13.065	13.6518	13.517	15.862	18.5513	19.2687	10.6615	13.2031	12.1637	17.9322	17.6367	23.0256	11.6325	11.9898	10.9808
	Csa6G497350	0.00076827	0.00619456	17.0981	16.3372	24.5798	24.0775	17.1112	11.6928	12.5921	18.5457	18.8076	16.6883	22.1791	6.9472	6.56417	6.51323	17.364	13.4749	8.79585
	Csa7G429630	1.32e-05	0.00019	17.8286	21.476	12.8338	13.8727	18.1574	15.3142	14.0647	20.83	10.6323	9.98664	9.79103	20.2576	15.1943	17.0356	16.1164	14.6523	11.835
	Csa3G904100	0.00988541	0.0476865	20.3706	19.5039	21.5195	21.3588	15.0838	16.135	12.4061	17.6012	12.2817	13.8427	15.9497	12.4896	15.1526	14.5638	11.3747	10.4597	10.3922
	Csa3G119790	0.00623014	0.0338084	17.6378	15.8231	15.3597	14.1425	14.2856	14.0506	16.4465	16.7832	16.2852	14.599	13.9272	15.2609	14.8611	17.1624	15.7158	14.2108	13.957
	Csa2G034620	3.39e-10	1.46e-08	17.7946	18.4836	11.2567	12.1679	13.2929	16.0026	14.6179	22.5796	10.1403	13.3067	10.7662	18.0073	20.0752	26.95	13.1358	10.9897	11.1166
	Csa4G637180	0.00694129	0.0366353	21.1402	18.7433	18.9691	16.1615	14.7746	14.4346	17.4897	14.3205	13.1985	13.2543	14.8225	14.011	18.1149	11.5823	12.9563	13.6052	13.1186
	Csa6G290830	3.62e-07	7.78e-06	12.3081	13.301	15.3465	17.1441	17.0004	14.519	13.0703	11.4501	17.873	18.5938	17.3413	11.6505	12.531	13.2096	15.8935	19.7363	20.1729
	Csa6G519580	1.42e-06	2.7e-05	9.00861	9.39118	14.7013	11.4923	20.6132	12.1862	10.4665	14.7178	19.2558	16.6539	21.0953	13.7814	9.29281	11.3481	17.7181	25.178	24.2504
	Csa2G294900	3.69e-12	2.17e-10	8.47224	16.8423	11.0681	6.88683	3.65862	31.2047	37.747	20.8138	8.24614	6.52493	7.38684	21.4412	26.7145	41.3146	6.40955	2.7301	3.90229
	Csa2G000160	0.000323725	0.00301422	9.59703	11.4489	11.9582	11.2795	12.0501	15.379	11.2864	9.85813	18.8699	16.4925	13.3489	16.1861	16.1269	16.8568	24.2507	23.4058	22.9717
	Csa2G248130	0.000671564	0.00557269	17.5967	20.3488	16.1656	16.1659	18.7571	15.6374	16.8076	17.8992	15.4737	14.4231	15.4209	12.7485	13.7309	15.6317	12.0994	11.2583	11.5993
	Csa2G036070	0.00374041	0.0224507	16.032	14.344	13.0338	13.4484	9.99031	16.3562	13.7816	13.6633	14.1997	16.3335	13.8946	19.619	18.1401	19.2475	15.7873	17.2489	16.9101
	Csa6G088160	5.4e-09	1.8e-07	35.6419	47.3929	14.5338	12.5682	20.5858	27.8128	44.4179	14.3844	8.3206	7.35517	9.38478	4.33481	7.49438	1.76837	2.95776	2.21362	0.90899
	Csa5G140490	2.87e-05	0.000379454	17.3756	17.1375	16.0034	15.9003	14.822	16.5691	15.7414	21.2236	12.6979	13.6578	16.9705	17.6511	16.0947	15.9207	11.1185	11.9565	11.3557
	Csa1G397130	4.25e-10	1.81e-08	5.37199	4.23124	10.9805	11.8184	6.09463	7.25755	7.69487	7.79135	16.2981	14.5844	15.4235	17.5698	12.395	22.9251	39.2739	33.2948	29.5727
	Csa1G256780	0.00728831	0.0379004	11.3243	11.6419	12.4501	13.7709	11.902	12.7398	9.29124	11.8695	17.9979	16.0933	15.8741	20.7668	13.5645	18.983	21.2125	22.6915	20.9255
	Csa7G430780	1.26e-11	6.89e-10	7.93601	7.68939	17.4785	14.1581	20.5362	10.0657	6.2844	14.4846	21.7603	20.2696	26.2449	8.81914	8.14703	12.0109	18.1128	28.1553	21.4157
	Csa2G021690	7.51e-10	3.07e-08	17.3526	18.5229	13.0916	11.7464	11.5345	15.6002	15.1191	15.2665	13.4302	12.9807	13.1075	20.9844	17.4225	24.3505	14.0875	14.2703	14.7532
	Csa7G071510	0.000130343	0.0013995	13.6794	13.2674	10.9836	12.5367	10.3185	15.4117	13.6743	22.3575	14.6762	12.4397	14.5208	21.4176	19.602	22.3693	13.7811	17.0417	16.0816
	Csa3G481240	1.44e-09	5.38e-08	17.2831	24.8581	11.7063	14.2941	15.653	13.7778	13.5038	25.9415	8.26954	8.84443	9.70624	22.5401	19.0851	26.2751	11.9668	11.7756	8.69988
	Csa6G169280	0.000247203	0.00241368	8.56375	12.7241	13.8893	11.4917	15.2944	15.847	12.3165	10.3728	20.7196	17.4477	14.9141	13.8379	14.8598	16.4885	20.0434	24.156	21.7316
	Csa2G059790	6.53e-06	0.000102306	19.1798	17.1531	15.3757	15.8796	16.0628	16.3847	17.7054	16.893	14.5426	13.4676	14.3823	15.6484	17.0149	14.9841	14.3228	13.0486	12.6568
	Csa3G098550	5.48e-187	1.04e-182	27.7984	28.9944	3.53462	4.47681	3.61688	28.2771	26.6883	28.038	4.26548	3.30409	3.99644	28.9734	30.5288	32.8766	2.4795	3.54151	3.51696
	Csa6G433300	3.03e-05	0.000396527	17.4125	15.2474	15.1142	17.2169	13.7153	17.6713	15.0081	22.8995	13.3646	13.2905	16.7839	18.5874	18.4232	22.0996	10.7936	9.26924	8.04154
	Csa5G156210	4.12e-08	1.11e-06	5.05517	1.1982	6.53254	14.7646	12.7421	1.45169	1.98724	3.6978	15.8873	21.8652	10.5899	2.14697	8.19893	16.3413	59.4124	33.7161	49.4387
	Csa6G094760	0.000108261	0.00119955	15.3691	10.4345	10.4616	11.6411	9.48898	18.8326	13.6939	18.8389	14.1982	16.0629	15.1645	18.9722	25.5782	21.0739	13.9844	16.3387	15.3707
	Csa5G181490	0.000352567	0.00324005	9.99544	11.6844	16.386	14.4237	18.522	10.242	16.0699	16.8922	16.915	20.0765	21.9633	13.0008	13.5096	9.70387	17.8493	18.7464	19.5378
	Csa6G187990	1.34e-06	2.56e-05	15.7814	16.6536	11.4378	10.5154	13.4067	15.8531	18.8638	19.0073	13.7167	14.139	13.136	18.0974	17.0638	25.2619	12.9763	15.993	13.6229
	Csa1G295140	0.00636628	0.0343905	12.3564	10.1417	13.8986	15.8847	13.5577	13.6301	11.9252	13.1369	16.4769	16.7003	14.6995	19.218	15.8694	16.4391	22.9787	17.1816	21.7125
	Csa2G351600	1.65e-06	3.07e-05	5.36698	11.3372	11.2381	14.0167	11.8319	14.1582	10.4436	8.47318	19.2424	16.6023	14.7451	15.2552	15.1261	14.0176	30.7565	24.8498	28.8055
	Csa3G150080	3.69e-12	2.17e-10	14.2827	14.1744	18.1983	17.5417	21.6612	14.2158	11.1081	10.8372	19.2998	16.7675	18.3133	10.7817	11.9628	11.0566	20.0159	19.2945	17.0661
	Csa7G387170	4.95e-06	8.03e-05	4.7946	11.5524	17.6407	9.18221	13.8265	12.7406	11.3284	5.79987	22.1217	18.0278	15.3332	11.5531	15.3044	14.3566	25.5408	31.8304	25.9937
	Csa6G401380	0.00062958	0.0052725	23.3716	18.7818	16.8399	17.6692	13.8907	16.2364	15.8938	18.0786	12.4209	14.2018	17.6889	14.6063	16.5211	13.3462	12.452	12.8462	12.1314
	Csa2G361490	1.35e-09	5.13e-08	15.4395	21.1915	11.4838	9.73144	15.1773	18.2523	23.3052	19.6444	12.7777	10.4633	12.4942	20.9372	20.1526	16.7891	12.0171	15.5699	12.0691
	Csa3G599430	0.00913591	0.0450278	14.4887	13.4648	14.0777	18.0558	16.959	15.4204	13.0446	11.8913	18.6971	17.8594	16.0178	16.4889	14.1016	15.2512	17.8466	16.1676	17.6964
	Csa5G420280	9.56e-19	1.32e-16	6.68367	8.29011	14.5693	19.3173	20.0715	11.6228	6.57059	12.1199	26.9417	21.211	22.2263	12.2638	7.85864	9.45123	25.3046	19.6502	23.3913
	Csa5G623560	6.19e-40	4.37e-37	19.7343	19.2797	10.5049	8.61899	7.52924	25.7715	24.9898	16.7995	7.86278	6.64979	8.55419	28.4689	24.82	28.0602	9.46571	9.99223	10.5587
	Csa3G134870	0.00565286	0.0313538	22.3984	20.1354	19.8797	17.4067	16.7669	18.0241	21.8502	9.53181	14.1474	13.4174	11.7092	13.0549	18.6431	13.4731	14.5767	12.4768	10.2364
	Csa6G423420	1.75e-05	0.000245469	12.3405	13.0728	15.9151	17.8154	15.1858	15.1272	7.97063	11.1429	18.9862	18.4504	16.916	15.166	14.676	15.965	21.5071	20.1998	17.5186
	Csa5G176000	3.21e-05	0.000417607	14.5289	15.5169	13.2037	11.2835	12.4417	18.5037	18.0078	21.6335	13.2577	13.0357	16.3235	18.6853	18.4102	18.6825	11.6698	18.3324	14.502
	Csa4G064120	2.29e-27	6.81e-25	14.3265	15.7783	6.56029	6.62169	6.27408	19.541	20.9945	27.0893	7.26665	8.43028	9.03146	29.3714	24.3358	33.9005	11.7438	11.7412	15.5863
	Csa7G011820	0.00965887	0.0468903	9.12069	6.57485	12.2201	13.2093	12.6819	12.2805	15.2073	13.362	17.1892	20.0867	14.9572	17.0988	17.9306	20.816	20.89	24.7378	20.5854
	Csa5G611700	0.000410509	0.00367167	21.9194	19.721	16.3458	15.3707	15.3246	14.2075	16.1571	20.8028	11.5976	11.6771	16.248	15.2694	17.5324	15.4125	16.0777	14.5885	10.8122
	Csa2G120940	2.22e-32	8.49e-30	19.5068	18.2064	9.85063	10.6217	10.1967	20.6311	18.4567	19.7039	9.66569	10.4315	11.3569	20.3727	26.4987	26.7711	11.2003	12.4324	13.4585
	Csa3G207380	0.00843634	0.0423918	13.2838	14.8653	18.786	17.1354	22.3116	16.6247	18.1711	9.56674	16.6653	19.6889	14.3937	10.8341	12.8224	11.9092	16.7766	18.7953	17.474
	Csa1G629780	0.00740672	0.0384114	14.8716	13.8646	17.9121	21.8028	18.3212	15.3912	11.2705	10.8455	19.5498	23.7655	16.9195	16.0542	12.6873	14.1677	14.3591	13.8668	14.9182
	Csa1G537370	8.37e-17	9.28e-15	11.1651	11.5715	19.2603	19.6605	26.3408	10.4819	9.88168	11.3935	22.2891	21.5125	22.8561	9.94722	6.96031	10.0785	15.9967	18.3735	22.8144
	Csa6G511100	1.52e-05	0.000215912	18.3811	15.9169	12.6024	9.97553	11.4963	15.2817	19.0123	27.3038	11.3561	12.9848	16.7141	18.9294	17.3631	21.2104	11.1852	16.7232	14.1795
	Csa5G608430	3.49e-09	1.21e-07	12.5324	13.8783	9.54447	10.8584	10.9211	18.1104	19.1565	24.7688	11.2991	12.9859	14.383	26.0655	22.3037	33.6687	11.1103	10.4955	8.81287
	Csa6G319710	0.000412878	0.00369113	28.2356	20.6765	18.0436	20.5328	16.4085	14.0462	17.3408	17.0291	15.0509	11.9821	13.656	13.8271	21.3871	11.6177	14.4293	9.11312	7.65562
	Csa2G337790	0.0028248	0.0180665	17.8688	16.9664	15.3977	11.5464	14.5734	18.0556	15.5515	15.9691	17.9348	15.0959	18.4741	18.8528	17.32	16.2487	15.4799	13.7448	11.9538
	Csa6G309980	7.73e-06	0.000119479	12.8753	19.4008	15.9161	12.9613	15.8375	22.5778	21.0619	15.9909	15.2452	12.0303	12.0794	16.1721	19.9112	28.3329	10.626	12.1868	8.08334
	Csa1G423320	0.00871097	0.0434614	16.162	12.2333	17.8329	21.0572	14.9905	15.361	11.7818	7.22029	19.6925	16.9172	13.9775	18.8058	15.8493	11.0659	22.4464	18.1704	17.7626
	Csa5G613530	0.00126177	0.0093367	17.8431	18.7591	15.4435	17.1194	15.115	16.1308	16.5094	24.0994	13.5257	15.0148	19.5294	15.3733	14.8708	17.0741	13.4274	11.2451	10.5404
	Csa3G062580	0.00505415	0.0286582	15.7511	14.1462	15.5989	16.9722	17.5611	14.887	13.6985	12.6432	19.7971	15.0945	17.8949	17.0957	14.0123	12.654	19.422	18.1509	17.4764
	Csa4G303040	2.93e-05	0.000385262	6.71262	3.3491	17.1304	9.18672	19.3917	10.2522	10.3191	12.2318	16.3659	21.6271	20.692	11.8545	22.0178	10.5706	13.3367	32.236	35.7975
	Csa3G175680	9.99e-06	0.000148792	6.48772	14.0458	12.9166	14.3248	22.2363	18.2474	9.8161	6.33908	22.1505	21.3663	21.9959	10.8403	14.0298	8.57238	23.6578	25.2988	21.0122
	Csa5G177040	0.00483015	0.0276844	16.6841	16.6931	15.5764	14.8578	15.3364	15.9908	15.0137	18.9155	16.4256	15.2145	15.8761	17.5204	16.0489	17.6276	15.4871	14.2029	16.0987
	Csa4G003100	1.52e-06	2.85e-05	12.7409	16.3576	17.5013	21.4786	20.908	12.4799	12.7403	14.0356	20.5968	20.4838	17.4163	11.3442	11.3266	13.1453	20.2697	16.8255	14.0318
	Csa4G083470	1.82e-07	4.21e-06	19.4566	17.6945	15.6166	16.5273	15.5865	17.7943	16.2277	17.1019	12.8429	16.0375	14.7209	16.4437	18.3075	18.2011	14.055	13.4513	13.7292
	Csa2G379200	0.00915039	0.0450875	19.2297	23.6139	18.4599	16.8265	16.6825	14.6053	13.6542	18.246	13.3176	15.0006	18.8772	15.0302	15.3156	16.8049	13.2002	12.8567	12.3155
	Csa4G111610	4.98e-06	8.07e-05	7.6587	1.11637	4.2789	15.3112	22.4209	0.541014	1.53185	2.17802	12.8032	17.8391	10.5387	5.50092	12.4216	16.8927	78.8219	23.7458	41.0011
	Csa6G498970	0.0010287	0.00792775	12.3611	15.0874	17.9821	17.2283	18.1933	14.8683	10.3686	10.9774	19.401	15.6252	18.4155	13.0174	16.6097	17.7297	20.3673	21.503	15.0091
	Csa6G476670	0.00068859	0.00569169	9.8622	14.4798	16.473	13.944	18.2099	13.2498	14.5186	20.9551	18.7359	22.5391	19.4979	9.33264	10.8636	9.99891	18.8295	21.7614	21.5797
	Csa3G894470	7.17e-06	0.000111299	8.99901	11.978	24.9257	14.928	21.6896	13.4828	11.9216	11.9331	23.086	14.2451	26.6618	11.5114	10.7496	14.0684	15.5648	20.2856	18.8429
	Csa5G148670	0.000690915	0.00570596	12.7844	12.7138	17.3721	18.2238	16.2865	17.1658	13.3865	7.28584	20.5043	19.7149	12.7553	14.4731	16.6764	11.2816	22.0714	21.8637	20.4015
	Csa1G462040	0.00015244	0.00159328	18.0965	16.1941	15.9774	16.2962	15.1678	15.4266	15.3634	15.9402	15.5894	14.9271	14.2829	19.7313	19.2915	20.5747	12.7093	15.8424	13.9485
	Csa1G470390	0.00593016	0.032551	22.1173	20.633	19.0147	18.5579	14.1781	17.5767	14.4275	20.5258	15.9864	12.9852	17.8101	17.9158	15.4546	11.1142	15.4407	11.7885	10.0399
	Csa1G537520	0.00562635	0.031234	22.2646	17.278	23.7443	24.3619	18.374	15.8902	10.0418	10.7257	16.774	14.1379	15.8238	11.6903	13.7361	10.1116	18.8673	16.4293	15.6213
	Csa4G639080	5.36e-08	1.41e-06	9.22645	12.3974	14.5433	17.6332	19.6179	14.7239	9.76853	7.9861	20.1489	19.7059	15.1938	15.965	14.4308	16.6268	22.2458	22.6694	23.0218
	Csa1G009820	0.00622206	0.0337825	17.4914	14.667	22.6024	24.476	17.468	10.6021	12.6842	16.4958	13.9305	17.7094	21.4035	13.7661	9.54601	11.5664	21.4077	17.6425	13.075
	Csa1G547510	1.94e-05	0.00026944	9.98996	13.4453	16.746	13.7964	17.6754	15.983	15.894	13.554	21.1778	20.5956	16.5817	13.0555	13.7696	12.2349	18.5619	22.1237	21.3947
	Csa1G042630	3.94e-13	2.62e-11	13.9773	18.5445	7.54612	13.6851	11.0232	21.1563	22.6154	23.2708	13.3128	12.6337	13.1534	25.778	20.0327	21.9314	13.4883	11.5475	13.2218
	Csa3G011850	0.00333692	0.02052	8.23454	21.9553	11.1326	8.64396	12.7412	28.6697	23.2342	16.6648	20.6256	13.7928	10.1295	16.1343	16.0473	23.2062	13.2345	17.9021	14.6064
	Csa1G014440	0.00672167	0.0357633	16.8399	13.0955	12.5439	13.3412	13.3736	17.0579	14.791	24.3049	16.1556	14.5571	17.3519	21.0637	15.9878	19.2347	15.8095	15.4538	16.5227
	Csa6G513790	0.0011039	0.00837321	14.0843	22.6305	14.2171	12.3762	13.281	15.8098	21.5299	20.436	12.0172	13.6544	11.0255	12.2736	19.1402	24.8228	14.4117	18.548	17.6794
	Csa3G769090	6.88e-05	0.000810215	18.2599	16.6176	14.2496	10.9838	14.4586	19.1628	16.521	27.2804	15.1248	13.5872	16.6295	16.8207	18.3459	19.1137	10.3052	15.8694	14.7709
	Csa3G021130	5.39e-100	2.57e-96	11.1294	20.1287	1.20711	0.869881	1.14786	26.7013	20.7307	18.4476	2.41101	1.69579	0.883126	53.3279	44.1497	65.8269	4.40017	2.63527	2.44665
	Csa6G502050	0.00919673	0.0452341	13.6577	13.8402	16.0773	14.0188	15.9866	15.6153	14.3648	13.5686	18.7898	17.5342	15.471	16.1704	16.6783	15.1468	19.0554	23.4983	18.848
	Csa5G645160	0.000502002	0.00434177	25.758	19.7867	21.1956	17.3544	16.4288	16.9403	21.1618	12.4917	12.0595	13.1232	11.5086	16.856	22.1503	11.9499	16.1394	13.2885	10.2673
	Csa2G238850	0.000374457	0.0033954	12.227	13.1231	15.1295	15.4614	15.3746	16.8399	11.5512	8.02449	19.7112	18.268	13.8076	17.0525	16.7323	14.5733	24.0265	21.1846	25.7499
	Csa7G388410	0.00236563	0.0156524	9.87498	7.87387	12.852	12.2852	10.4776	14.9191	13.9208	8.91681	21.7467	16.5457	9.25901	19.0833	15.8439	14.8602	31.3709	25.7001	33.4238
	Csa4G004950	0.00338567	0.0207726	15.61	16.2357	12.1019	15.5343	15.9858	15.3562	17.133	27.1435	13.9509	14.3004	19.4414	17.0761	18.5433	20.9367	12.9748	12.4194	14.8706
	Csa2G353490	0.0019616	0.0133735	22.1748	15.6187	18.1612	19.1033	16.7809	17.1499	17.6019	13.8609	15.6171	15.7007	14.422	18.8908	18.6992	15.4768	13.6317	13.3935	13.4821
	Csa4G417500	0.00464044	0.0267513	18.1922	17.6372	16.1349	13.21	15.4904	16.1592	20.1746	17.9241	14.4662	14.1082	16.8993	15.8088	18.7133	15.9419	16.3328	16.8816	16.1048
	Csa2G428380	0.000239247	0.00235286	10.7002	13.6995	16.3907	13.9687	15.2251	11.1543	13.0925	14.1829	19.2354	15.8379	16.9674	12.6571	16.0289	15.7491	20.4373	27.5272	27.6132
	Csa4G181200	2.46e-05	0.000331749	9.26952	14.4225	10.1962	8.39364	11.2622	17.8284	20.2399	16.0259	13.2789	11.8432	13.2293	25.5228	23.0404	39.0469	12.871	14.5073	19.8132
	Csa3G778370	2.4e-14	1.9e-12	13.9177	23.032	10.2857	6.49104	8.58605	15.1149	28.338	28.3654	9.57053	8.75614	10.9651	21.3534	25.1247	36.9856	11.6247	11.4942	11.3518
	Csa1G050090	0.00973749	0.0471866	16.2265	15.6833	16.6047	15.875	13.9025	16.0903	13.1119	23.8274	14.8918	15.1408	14.0342	17.7579	20.2388	21.1941	15.267	15.4007	16.4121
	Csa1G043250	0.000686437	0.00567635	10.2827	15.7148	10.9063	10.167	14.0544	19.8401	15.0015	15.1508	15.9484	14.5124	12.4829	21.5126	24.0741	32.0713	15.6271	19.404	15.3454
	Csa3G074470	0.00957722	0.0466299	29.0417	22.8865	21.9303	23.433	15.8649	18.9168	17.2486	15.6578	15.0259	13.4196	19.1599	12.0918	14.4803	10.8998	13.5737	10.6139	8.00095
	Csa5G623510	1.83e-06	3.35e-05	11.696	14.4974	22.5278	18.6719	28.984	18.708	15.5334	15.5257	25.0419	22.823	20.4095	7.81149	8.15816	10.7512	15.0721	14.4729	12.0206
	Csa4G650230	0.0094299	0.0461428	8.86929	10.1022	7.33846	7.02354	10.0506	12.0525	14.5738	20.1306	12.9779	12.551	12.7126	29.8293	23.5544	30.1995	21.4799	27.39	21.9392
	Csa6G538800	8.98e-13	5.69e-11	19.7692	20.3264	12.6655	14.9834	13.7277	19.9093	15.6478	17.8241	12.4643	13.5589	15.6654	24.9271	21.2162	23.861	12.1963	11.3341	12.9568
	Csa3G113360	0.00316831	0.0197182	11.7702	11.6137	13.3741	14.2866	15.1198	15.9295	12.103	9.9407	20.2488	20.5106	15.18	17.8915	20.6339	19.0449	20.341	22.5084	22.6427
	Csa3G889820	0.000172384	0.00176636	16.4042	16.5813	13.9138	10.6199	14.4227	15.9674	21.3272	17.2463	13.2569	14.4004	12.7098	16.3673	24.1951	22.0241	19.5185	18.5447	15.6615
	Csa1G045500	0.00817294	0.0414407	15.1048	15.5477	14.466	18.2636	17.8925	18.5578	7.71171	7.12597	22.6018	18.3547	14.4826	18.6462	16.2246	11.4756	25.8235	21.3936	19.4963
	Csa3G791540	9e-05	0.00101933	19.0087	20.0045	16.5632	19.2332	16.8148	16.7213	16.2855	21.4203	14.5469	15.4493	17.2065	17.3839	17.593	16.9194	12.6051	13.3418	12.2445
	Csa7G073430	7.41e-15	6.33e-13	10.9771	10.2617	23.6665	22.1565	22.0901	11.6203	12.2539	13.8232	28.027	20.7527	17.5463	12.3235	9.95652	9.64482	19.9884	21.2643	17.1569
	Csa3G775250	1.44e-06	2.73e-05	12.5383	20.0285	10.4256	9.26653	11.8282	19.9848	17.4504	19.3092	16.0047	12.583	12.1128	20.2442	22.6102	24.6337	15.2073	18.8379	20.603
	Csa6G526250	6.03e-06	9.56e-05	5.93432	7.55545	20.2064	10.2147	14.0843	14.5601	14.9438	14.7802	25.032	21.4076	17.9508	12.1184	12.7778	16.1035	17.776	27.0155	31.5419
	Csa4G304760	2.58e-05	0.000344543	3.12566	11.8459	21.6782	7.94118	14.8613	4.56317	8.41148	1.77779	22.1884	16.059	15.2141	1.49669	2.0543	4.37918	48.5105	61.3162	39.1788
	Csa2G369730	0.000127612	0.0013756	7.90355	8.77643	14.6553	9.84574	18.1537	14.4867	9.94687	10.5495	19.9722	14.8738	17.3038	16.5075	15.3889	22.8085	22.4265	37.8525	23.361
	Csa5G158480	0.00193036	0.0131936	18.0745	13.3633	17.053	12.1941	12.978	17.0023	20.8111	15.5286	15.9275	14.7654	13.1918	20.6075	21.4778	19.0984	18.2642	16.5601	18.0451
	Csa7G027270	0.00748414	0.0386866	19.2811	12.6356	19.7272	19.2932	17.2105	16.2655	10.4916	12.5725	21.2645	17.9166	17.3582	17.7058	13.4391	11.5397	21.4115	18.3827	18.4689
	Csa4G463190	2.43e-07	5.44e-06	12.9408	20.212	10.348	8.03221	7.11833	20.7205	25.9231	12.4801	16.7514	11.776	11.7356	32.3548	24.5926	23.368	20.7594	11.0868	14.8602
	Csa3G094510	0.000254438	0.00247041	21.7865	25.3797	22.3569	19.4444	15.2873	15.6728	20.6643	16.3569	12.8944	13.3227	14.0262	13.86	15.78	19.6225	15.0733	9.88398	13.6568
	Csa6G110840	0.00055661	0.00474474	21.2365	16.9853	11.1244	19.3697	17.7563	17.1243	19.807	28.4041	14.1411	15.737	17.5002	17.4863	13.8964	19.9738	11.1788	10.3468	13.1629
	Csa1G479110	0.000195347	0.00197407	3.68466	7.84156	10.9674	5.63986	7.2295	12.8842	10.0498	10.4367	25.4424	9.85401	21.908	19.5844	13.9443	9.94104	32.4232	51.4093	32.1141
	Csa6G509570	0.0026073	0.0169226	17.7796	17.4617	17.3358	14.5588	12.3594	17.3092	14.8767	16.1572	15.0596	14.8355	16.1494	17.4339	20.1049	21.1254	18.5504	17.4658	16.8659
	Csa5G219380	0.000900332	0.00708853	17.498	19.2022	23.6632	21.0347	22.3969	14.663	12.3482	15.8406	19.1262	16.638	20.8959	10.0959	13.6701	10.6759	16.0979	14.6767	17.5191
	Csa3G199620	1.12e-08	3.43e-07	21.4695	22.1055	19.1253	17.0655	15.2517	16.4812	20.256	16.9883	15.5517	13.0695	12.5783	18.168	20.5694	16.8764	14.8529	12.1115	14.0242
	Csa6G487590	0.0101329	0.0485608	10.9165	13.1639	10.9266	13.2371	12.6411	15.5631	13.7233	12.1583	20.738	21.3464	18.1604	20.9208	16.6954	17.8122	22.5212	20.8711	25.1811
	Csa7G390200	0.000126565	0.00136973	25.1232	21.0757	21.6257	21.723	16.0868	17.3469	15.9648	17.4107	13.4634	14.4275	14.9346	17.828	24.1689	13.3767	13.6606	10.3098	8.44407
	Csa4G000810	7.15e-37	3.69e-34	19.8357	12.8173	5.01938	6.18866	5.62071	15.9122	23.909	27.3682	5.57257	5.85319	3.88777	37.3779	40.0038	49.9056	10.0134	9.44653	8.4409
	Csa4G303170	1.86e-05	0.000259548	4.80687	17.6902	20.6219	11.3225	17.4872	13.0882	13.0197	11.0995	25.2281	21.6839	19.0927	6.56672	6.43252	10.8453	29.7769	34.2203	24.2256
	Csa6G366250	4.74e-15	4.21e-13	33.7141	34.1938	13.2028	12.8635	13.2078	34.2636	41.5461	33.9794	12.6575	10.0155	14.9584	8.57168	11.0436	3.34556	4.87073	2.60678	2.30402
	Csa3G149910	4.07e-05	0.000511104	8.28006	12.9545	16.8293	13.2772	20.4578	9.06606	7.15147	11.5853	19.2584	20.9531	22.3623	12.9848	12.2005	23.5933	17.7251	28.4979	30.2631
	Csa6G405890	0.000147248	0.00154619	11.7177	14.6192	21.1798	16.9071	18.1141	15.5831	13.776	7.34303	20.6556	16.5868	14.3717	16.0826	16.0625	14.6008	25.9415	24.4524	19.4661
	Csa7G019890	0.000223429	0.00221904	3.38976	16.2827	7.51512	2.03086	0.73628	41.1247	40.8649	28.6411	15.1429	12.662	16.6603	25.7893	23.401	20.0582	15.6024	11.0642	6.85445
	Csa5G387400	0.00114269	0.00863654	12.796	15.145	14.4782	17.082	15.1524	17.6105	12.7655	11.1696	20.984	18.9396	17.466	18.0215	17.007	15.9641	22.1231	22.0405	19.3311
	Csa3G732510	0.00699734	0.0368292	14.5694	14.6206	20.9188	18.6368	18.0269	15.0071	15.1902	15.7606	18.1514	16.0744	16.9888	17.0772	15.8185	13.4656	20.1109	18.912	18.7552
	Csa6G011700	0.000462744	0.00405891	7.96837	11.6618	13.688	11.0189	15.1763	15.6702	12.8198	12.7826	23.0289	18.0129	20.2217	16.88	15.9018	21.3008	20.2105	30.1292	22.3334
	Csa6G382950	0.000358471	0.00327851	11.1523	15.4433	10.2861	6.88028	7.81479	19.5638	15.0567	12.5911	14.8609	12.7745	11.3664	28.5364	21.398	30.1148	25.7389	25.2537	20.2825
	Csa3G017320	0.000163839	0.00169336	8.8338	12.9314	7.43386	6.51535	8.05481	16.1582	16.801	16.7034	13.2398	12.2356	10.9663	27.7151	23.2158	32.342	25.3302	30.4635	20.2799
	Csa3G098560	0.000785572	0.00632604	14.6531	16.1167	12.3943	12.2259	10.437	19.4111	20.6383	11.8262	15.7647	15.8271	13.2381	22.1673	22.9229	22.1841	18.7558	19.104	21.6351
	Csa5G608450	3.86e-07	8.25e-06	19.9924	17.5788	16.5081	16.1844	15.6761	16.2404	22.9885	22.4415	13.7865	12.7553	14.1651	18.5538	19.4342	21.9034	15.0398	12.413	13.8507
	Csa1G024890	1.22e-10	5.72e-09	14.5875	16.4953	9.88779	7.25618	11.5604	16.8804	21.49	20.8626	13.8607	13.4274	15.1344	28.2397	23.6593	27.1456	14.4654	17.8586	16.7132
	Csa4G625560	0.00312596	0.0195263	25.1472	18.8151	19.9764	19.3246	15.7149	21.4003	17.2554	9.871	16.5319	16.0492	13.2093	21.4848	20.5247	15.3253	14.596	12.2995	12.3595
	Csa4G011770	0.00723564	0.0377786	5.87452	10.3147	11.0491	5.70437	13.8627	15.1843	13.3338	17.2027	19.2874	16.5197	27.1912	13.3213	14.1556	16.2607	17.6784	41.0624	32.0885
	Csa4G064040	0.000969142	0.0075308	9.91597	12.2656	14.0909	10.575	15.88	15.3032	13.8692	11.1251	20.3026	18.5086	16.7383	18.712	16.8358	20.455	23.7869	25.1833	26.6345
	Csa5G262260	0.000483321	0.0042142	25.4213	21.195	20.7701	15.5721	16.9172	21.8384	18.2084	14.1506	18.6358	13.3548	13.3562	15.0735	17.0256	15.7013	14.8938	15.902	12.2247
	Csa7G071440	0.00192712	0.0131761	7.73526	11.3049	15.2558	13.3125	17.8164	14.9847	17.3832	17.3607	21.6971	25.2831	17.6829	18.2007	14.1636	13.7932	19.0855	17.8561	27.5258
	Csa7G432520	0.00912596	0.0449904	3.39399	4.6504	9.73446	3.63116	5.97213	20.1393	15.6906	9.26595	19.3034	13.2734	21.2254	19.8068	19.7521	20.9402	26.5645	40.6032	37.0355
	Csa3G904080	6.68e-06	0.000104364	22.7629	19.7981	17.6304	18.2952	14.8745	18.9133	14.0536	13.3961	14.4179	13.8947	15.3581	19.9067	22.1957	18.7914	15.7367	16.4174	14.6041
	Csa5G630880	0.000390117	0.00351913	19.2418	17.5456	17.6313	15.0975	17.2843	16.8112	23.3823	16.4938	13.5909	14.0833	13.6156	20.0961	18.1463	18.971	15.6602	17.3622	16.5979
	Csa7G051390	5.44e-09	1.81e-07	10.8472	14.3289	16.3951	16.7101	20.0521	14.5115	10.2471	12.0449	26.9564	19.8431	20.621	16.9584	14.0744	13.7433	22.8805	24.0552	18.4363
	Csa7G354530	1.04e-06	2.03e-05	15.4952	16.6659	13.8074	8.79748	14.4876	18.7564	21.745	28.0204	12.221	13.0546	12.9928	22.6942	23.5274	24.2335	18.9485	17.1313	10.193
	Csa3G880030	6.27e-07	1.27e-05	7.45002	10.1536	14.6399	13.1544	14.3476	15.2652	4.53383	8.37407	24.5094	26.4044	14.6314	19.4443	15.8591	12.8586	33.9226	33.6185	23.6456
	Csa4G269760	0.00933606	0.0457189	16.85	17.2607	19.3266	20.8535	19.2979	18.3511	11.7192	11.9841	20.8638	18.663	16.8923	16.7867	17.3616	13.3768	19.6128	18.0895	16.385
	Csa3G121610	0.00417098	0.0244352	15.808	17.0765	16.0352	12.3137	16.591	19.1514	17.7251	15.8837	15.7068	16.4345	15.7044	19.2169	21.0699	20.0747	17.8167	20.6759	16.6632
	Csa3G239290	0.00382559	0.0228541	20.6534	20.3038	16.7284	21.2675	15.0833	19.4876	14.3309	18.436	17.3021	16.7881	19.8092	19.224	15.8466	20.036	14.2172	12.6991	12.3103
	Csa3G778280	2.53e-21	4.46e-19	13.9975	17.7201	5.54948	5.73787	7.28085	22.4715	29.9688	30.3739	8.98159	11.5246	6.17324	27.8861	27.1898	50.601	6.96035	10.2084	11.9718
	Csa5G310310	0.00214226	0.0144145	17.4699	17.6436	14.7209	15.6236	12.8194	21.0728	14.831	13.1903	15.6314	14.4396	13.0472	22.3518	19.7721	22.2726	22.8885	16.6588	20.4101
	Csa6G421630	0.000460989	0.0040491	10.3414	32.6543	13.9337	6.4417	11.6435	29.2918	10.197	24.9095	12.3468	6.61265	11.3804	22.0045	18.306	28.7768	18.1393	22.9124	15.2244
	Csa2G403660	0.00117258	0.0087962	16.8995	18.979	16.5282	15.3138	18.4692	17.1292	13.7306	23.6559	16.9541	13.2637	16.3207	20.0669	20.6197	25.6744	14.404	14.1853	13.2458
	Csa5G580650	0.000831312	0.00662808	17.9474	15.9552	21.1305	21.644	20.1849	18.6753	13.3322	9.20779	19.8164	19.0551	16.028	14.4841	16.2506	12.0723	21.5427	20.9748	17.4763
	Csa2G368850	4.96e-06	8.04e-05	11.9417	11.0968	19.1137	17.618	18.9673	15.1213	8.72971	15.6158	25.4353	17.7016	22.3684	18.3442	14.3439	13.4602	24.8445	25.3323	16.2252
	Csa3G748270	5.79e-23	1.17e-20	8.75804	23.4657	1.80169	1.86033	2.40538	25.1103	28.1974	16.5448	4.12575	2.32802	1.69136	42.1072	42.7913	50.5018	17.0661	18.4268	9.54914
	Csa5G608360	5.07e-08	1.34e-06	20.3646	17.6267	11.2727	12.7944	8.50403	17.9112	15.1611	24.6273	14.5308	11.2173	14.1203	26.2669	29.4627	30.188	14.4528	11.6952	16.7934
	Csa4G314460	3.55e-07	7.67e-06	18.8704	21.5706	16.9017	14.1158	14.8783	21.4592	19.7512	16.8193	15.5063	12.3784	13.1641	19.3522	22.0474	17.9346	19.2063	18.6192	14.6628
	Csa4G334650	0.00122823	0.00914527	29.5854	22.8715	21.8016	19.528	17.6493	15.7628	14.4424	25.2623	11.3917	15.0232	17.513	14.6916	26.5265	11.7689	14.0525	10.1529	9.39791
	Csa3G829250	1.01e-09	3.95e-08	19.1986	21.1083	28.9535	32.9964	40.2461	13.7605	9.98445	17.5097	23.3749	25.9999	30.1865	4.22382	3.3429	2.50511	8.01167	6.06331	10.0233
	Csa1G009670	0.00145498	0.0104936	13.8862	14.455	15.4134	18.142	16.8879	16.9897	13.2543	12.3705	22.1117	18.2064	17.4964	17.5585	16.2396	19.7757	23.4211	19.4724	22.4586
	Csa7G058560	4.81e-25	1.22e-22	15.4725	20.4364	10.1469	10.6581	9.15783	25.3294	29.2042	23.9651	12.5802	13.1654	9.93793	30.6558	23.6348	31.1837	10.1899	9.94376	12.863
	Csa4G056790	0.00185776	0.0127949	22.6789	20.3181	21.5134	18.2484	17.5758	17.5357	16.4176	16.5688	15.6904	15.8382	17.2249	16.5551	18.3955	17.4949	16.6991	16.4766	13.7052
	Csa7G393970	2.67e-06	4.65e-05	17.5623	16.5336	16.5021	15.2314	14.8812	20.6069	17.8153	16.7291	16.7254	16.4586	16.7687	21.3272	19.8394	20.6605	16.7255	17.0272	17.9609
	Csa6G483360	0.000281893	0.00268995	16.8166	18.7232	24.0672	19.8896	20.727	15.5195	12.7866	11.1887	19.2423	15.8074	17.3878	14.1073	17.2282	16.3074	20.6241	20.829	18.2632
	Csa3G177960	4.54e-14	3.49e-12	30.3718	23.6656	16.2741	13.7625	10.408	19.6048	24.664	28.8078	8.11078	12.8356	15.9597	21.761	30.7069	19.3758	9.1044	6.39272	7.76206
	Csa5G217170	0.00907515	0.0447747	8.19375	10.1057	12.6136	10.9984	15.572	18.2372	13.6622	14.8956	20.9413	21.0064	19.0379	22.4865	18.1809	22.7044	22.0221	27.2861	21.7178
	Csa1G435780	0.000319849	0.00299092	13.8769	14.2272	18.1374	15.6143	17.9162	15.4758	17.0164	11.9324	19.4117	20.7368	18.1065	15.0192	17.72	15.8773	20.2636	23.0617	25.4304
	Csa6G399760	0.00734946	0.0381559	13.6494	15.4471	17.3169	15.767	17.7312	18.7572	12.6903	17.9191	20.3865	20.6713	20.7821	15.8933	15.7476	16.8482	18.9449	21.2362	20.1346
	Csa7G394010	0.00203227	0.0137863	14.8018	14.9649	16.03	18.5153	16.8924	15.6422	13.7873	17.5942	20.1184	20.5179	21.8088	16.1457	14.9732	17.2779	19.2331	20.6739	21.1844
	Csa5G167200	0.000263996	0.0025499	16.9318	17.5634	21.2381	23.1333	22.0764	16.2019	12.8188	11.2297	19.2569	21.9038	17.1489	14.0697	15.1033	16.5492	16.034	18.3639	20.6525
	Csa6G490970	0.00541337	0.0302631	21.8756	16.9701	24.6663	25.1366	20.4585	16.0647	13.3431	13.3601	19.3354	18.6647	18.286	12.9764	17.0541	12.8826	17.6749	17.4854	15.1787
	Csa3G837550	0.000466618	0.00409036	9.91302	12.7668	14.1129	9.454	14.6383	16.8039	10.4122	8.84168	18.8731	16.1205	20.4486	15.6037	16.8435	18.4925	24.6354	35.1419	38.3146
	Csa6G511740	0.000146319	0.00154067	20.435	24.1781	18.6497	18.1005	18.3883	18.494	17.8017	22.3673	16.2678	17.0576	20.4173	16.1415	16.9137	17.054	13.0012	14.2446	12.6752
	Csa3G895630	4.2e-05	0.000525449	12.2324	11.0342	16.6928	16.549	15.6255	17.6433	10.9085	12.466	23.2718	18.5567	18.4902	20.3892	17.4428	20.7325	24.7142	25.1027	20.6484
	Csa5G548110	0.00458857	0.026523	8.55972	11.0042	19.3499	9.02267	18.809	19.7084	16.0546	14.4496	24.8908	20.8594	20.5268	18.2316	16.9448	16.7788	19.7956	26.786	20.8018
	Csa3G166230	0.000917812	0.00719053	13.0471	12.8573	16.6588	16.722	15.9644	18.832	12.2744	6.52342	23.0059	20.5333	14.1413	18.7632	18.8234	15.0689	28.5043	25.8002	25.4557
	Csa6G331000	0.00467859	0.0269372	17.7017	15.4215	22.9301	18.6318	19.5846	16.3008	12.8085	6.72358	20.4014	22.119	14.7998	13.6665	21.2859	14.4098	21.9158	21.9462	22.669
	Csa3G889130	7.22e-17	8.19e-15	23.3372	32.3581	13.1456	16.7472	19.9958	27.3368	21.7301	17.9855	13.2962	11.7543	12.6125	19.7673	20.0257	23.1246	11.3564	11.9181	7.69642
	Csa3G073890	0.00766092	0.0394295	12.0918	16.8808	15.4783	17.0478	18.1237	17.9722	10.5025	13.042	21.254	20.9596	20.8265	21.1071	17.3098	18.2946	21.7221	20.0916	22.4355
	Csa6G190450	0.000222114	0.002208	9.25244	14.0034	21.7132	15.0425	18.596	18.2265	15.7248	5.45035	22.0516	21.9023	15.3757	15.1648	15.7953	14.6552	26.3556	30.2413	25.6192
	Csa4G062920	3.52e-13	2.36e-11	8.61677	10.1659	17.7183	13.7805	17.1263	13.2528	9.28845	10.9027	25.6666	20.6415	18.4908	16.5511	19.0663	19.9414	25.4158	31.2752	28.3797
	Csa3G016400	0.00129486	0.00955193	16.2209	13.3719	20.7243	16.3939	19.4436	15.7936	14.5293	12.6923	18.8744	21.5646	20.28	17.0174	18.7932	15.1974	16.5786	22.627	26.2692
	Csa4G127010	0.00960611	0.0467174	16.1827	15.2028	15.517	11.8722	13.8324	17.7166	18.6832	28.5797	18.5502	19.1898	19.401	20.6326	17.2166	24.1602	15.8964	16.74	17.3173
	Csa1G032450	0.00638811	0.0344499	9.67304	12.5256	10.5921	10.7231	14.3121	22.5676	13.2892	16.0607	19.357	12.0686	12.3152	35.2744	25.8131	42.8953	21.1978	18.3975	9.8069
	Csa6G124170	0.00803091	0.0408595	24.4325	22.3277	19.6617	17.7206	18.9273	22.3099	18.6825	9.91503	17.3417	15.586	13.2135	17.1701	19.9706	20.6801	16.8907	17.9647	14.2819
	Csa3G900980	0.00574672	0.0317451	19.9386	19.2833	18.8175	15.7135	15.8906	16.4593	17.7323	21.0283	17.2344	15.5007	20.314	18.2501	22.3767	18.6681	17.2148	16.3687	16.3046
	Csa4G314420	0.00465291	0.0267975	18.776	18.3981	19.8713	22.6762	29.084	14.5595	16.3173	14.4408	20.6812	20.8751	19.6666	9.82551	14.9073	14.2448	19.0346	20.4333	13.3329
	Csa5G002030	6.08e-12	3.48e-10	13.9219	19.3842	9.51334	10.2544	12.193	22.0068	13.4176	24.2461	12.8425	13.1837	12.3477	30.191	31.0528	39.0869	14.4137	14.1173	15.1643
	Csa4G001510	0.00787539	0.0403048	21.8194	18.5974	21.2312	19.2741	15.5144	17.6794	18.0509	15.4103	16.0852	16.0427	17.7204	19.8637	21.047	19.0667	19.5856	16.0212	14.6101
	Csa6G076730	0.0101011	0.0484573	15.1324	15.8547	18.7407	16.6064	17.8056	18.8633	15.1267	10.3145	19.2312	19.4081	16.4529	18.1787	19.9238	16.3061	23.647	22.9171	23.3409
	Csa7G407710	1.5e-10	6.95e-09	9.37321	13.9361	19.6636	20.8517	28.2107	11.1041	15.0742	11.7085	22.2245	24.8097	26.2251	8.09401	10.8653	14.8397	21.8955	23.2621	26.3348
	Csa7G419630	0.000125973	0.00136425	16.5509	17.9537	15.6811	13.7218	14.5301	17.1885	17.4626	24.5437	13.3034	18.4937	16.3188	29.953	20.2241	24.6649	15.1141	14.5283	18.4142
	Csa3G077670	0.0049414	0.0281865	24.8878	20.7674	22.8171	20.3872	16.8956	17.198	17.2394	17.9868	16.0868	18.0278	17.5375	16.3036	21.8032	17.4534	16.7819	14.5133	12.3004
	Csa6G324830	2.78e-11	1.44e-09	22.1059	23.9591	14.6152	12.5618	15.204	23.7556	20.787	22.593	17.2312	11.7661	16.879	21.127	19.267	30.2721	14.0429	13.4577	9.87436
	Csa4G416430	0.00638126	0.0344422	4.73533	10.9966	14.0465	6.89726	13.6099	14.5685	10.9572	17.3204	27.6952	22.7962	20.3594	19.5487	20.6268	23.8633	24.6656	30.4534	27.0514
	Csa3G033790	0.00782409	0.0400853	17.43	18.9961	20.3743	19.3139	21.4387	17.0589	16.1256	10.9881	20.0742	19.7554	17.2092	15.8249	17.6988	16.6133	21.3398	20.4599	19.7049
	Csa6G014480	6.38e-10	2.65e-08	11.6632	9.20382	22.9683	18.182	21.8378	15.8096	13.6474	7.3472	24.2767	21.2649	16.4896	15.097	15.6149	11.3102	28.5861	34.4986	23.4164
	Csa6G092590	0.00830367	0.0419673	18.5989	17.8128	21.5463	20.2261	19.4416	19.8821	12.029	9.94163	21.6947	19.1402	17.3582	16.0522	19.3282	15.004	21.9442	22.0062	19.3743
	Csa7G047210	1.22e-05	0.000177357	14.5847	14.5661	19.0488	20.4496	19.0525	19.2422	14.0176	14.1492	24.2289	22.3308	21.3269	16.2682	15.7938	17.9293	18.1914	20.8214	19.5426
	Csa6G046330	1.8e-09	6.66e-08	13.067	13.0898	13.5218	10.0026	11.0397	19.2812	17.145	18.952	13.0112	13.999	12.34	33.9051	29.1971	33.7244	19.5909	20.4259	19.2678
	Csa3G215590	4.99e-09	1.68e-07	6.16652	10.2573	17.2015	10.5391	22.1407	13.0231	11.2397	16.4482	31.6165	19.7504	43.3571	12.982	6.97417	6.844	20.9083	30.804	31.3363
	Csa3G203260	1.51e-05	0.000215171	27.9927	20.171	20.5655	20.1094	18.0115	20.6231	20.1677	15.6501	16.0381	15.3351	14.9075	17.3339	22.2786	16.7925	15.6458	15.8872	14.9453
	Csa4G304250	4.19e-05	0.0005243	3.08936	25.488	32.2289	11.6287	20.3974	7.25627	12.0072	4.21713	46.1442	48.9499	24.5072	1.16495	1.22809	0.965098	24.4663	25.6181	23.9942
	Csa6G500400	9.14e-06	0.000138041	11.8944	14.8247	15.0037	18.5112	20.3262	17.9608	13.9059	18.5379	25.9016	24.1413	26.3563	15.7697	11.63	15.8819	19.0385	22.799	20.8729
	Csa3G134990	0.00809894	0.0411397	11.1877	13.7651	17.0142	14.7751	14.4733	19.2181	13.6225	13.0656	22.0278	20.331	16.4312	24.0545	19.6967	20.1962	25.659	24.0421	24.2657
	Csa6G169360	0.00242582	0.0159841	20.5404	18.0407	19.909	15.9193	14.8219	19.2381	18.0183	27.1456	17.7858	17.4463	20.3518	21.3524	18.3508	18.6848	16.9421	13.8023	15.8726
	Csa4G638510	0.00902416	0.0446154	9.88386	9.01102	16.5143	12.855	20.1482	13.0754	18.2333	15.6997	19.2008	23.1512	21.1483	19.6195	17.0307	25.722	21.3063	27.1757	24.8832
	Csa6G141350	6.37e-08	1.65e-06	6.04917	13.474	8.74835	5.70277	8.20464	18.7731	19.9804	20.4255	12.0936	9.03765	8.2583	35.1885	36.5987	52.6344	24.4019	18.2505	17.3798
	Csa5G608150	2.07e-08	6e-07	16.6504	21.1778	13.1205	12.72	15.3773	17.1387	25.3859	23.2413	14.5923	16.5241	15.0361	24.1013	24.7264	31.2681	12.7916	15.0648	16.6541
	Csa1G587980	2.48e-05	0.000333777	6.52385	10.7705	16.2619	15.2166	18.8804	18.8177	14.3951	8.4458	27.5008	21.5555	18.3467	16.0086	16.6483	23.273	25.8746	33.9627	23.3606
	Csa6G429120	0.000408312	0.00365373	22.1695	20.857	19.5057	19.6213	16.0479	17.8991	16.8999	19.1107	17.1788	15.4299	18.6949	24.164	19.9081	19.4714	16.3698	17.1896	15.4899
	Csa1G679550	0.000380825	0.00344495	29.9863	18.2043	18.6579	22.3956	17.1665	17.3584	21.6047	23.283	14.2884	15.7951	18.9996	18.6187	21.0229	16.8033	13.1508	15.2771	13.885
	Csa6G445140	0.000537471	0.00460217	46.7429	28.5595	11.9625	15.7165	12.6018	13.5396	17.7525	51.1467	3.24095	17.492	12.4246	16.5393	25.6516	13.9485	5.05486	7.16365	17.1205
	Csa5G637710	1.75e-07	4.09e-06	24.3054	21.2043	18.157	19.7789	16.8375	19.7836	24.222	33.1324	16.3437	17.1341	20.7568	19.7074	19.8781	18.0742	8.92271	8.45297	10.042
	Csa7G074870	2e-08	5.82e-07	19.6802	18.2403	24.7497	27.296	23.8763	13.6755	11.4031	13.5098	20.2469	19.3249	19.6321	13.8356	14.6469	16.9189	20.5702	20.5322	18.5953
	Csa3G481230	0.000120579	0.00131314	26.6267	23.4319	22.3615	20.254	18.9282	20.6058	19.7342	14.659	16.7363	15.0534	14.5158	16.3382	22.3638	16.9575	18.0284	16.2624	14.0075
	Csa3G778210	1.56e-09	5.82e-08	22.4035	21.8891	15.6781	18.7682	21.5683	25.4491	23.1288	19.7612	17.9652	15.6458	14.5107	18.144	23.2353	20.8819	11.8312	13.6182	12.5653
	Csa6G190490	6.45e-06	0.00010141	23.4875	18.7117	17.4159	17.5434	12.7839	17.9252	19.9997	29.1626	12.8157	16.3646	17.8189	24.5247	24.9214	20.7715	18.3195	11.1334	13.639
	Csa1G132110	0.00358284	0.0217099	17.0791	19.2493	13.3869	13.9814	18.4099	14.7488	23.6325	26.3184	16.0764	17.7866	19.457	18.6985	20.5003	28.4242	15.149	16.4126	18.2979
	Csa6G507090	0.00106962	0.00818153	29.2617	24.4269	24.4157	21.706	17.55	17.5426	23.362	18.8063	15.423	17.0093	17.1207	17.4182	31.3924	10.9928	14.735	10.0034	6.99285
	Csa3G099630	0.000143827	0.00151694	8.0214	17.1804	17.4161	20.4939	32.6088	20.8823	15.1892	17.2476	28.0015	27.8056	21.7391	12.5341	11.7058	11.4826	18.0189	15.7872	22.0513
	Csa1G002060	5.52e-05	0.000667391	5.84887	10.563	8.01133	3.81664	7.58414	20.5655	18.2481	12.2213	13.0147	10.8312	9.52692	42.5778	32.6658	45.7548	26.2248	24.9921	26.3261
	Csa2G350310	0.00495951	0.0282644	20.3919	15.0532	14.3066	13.4354	11.4068	17.8025	23.1565	21.0231	14.2469	20.7426	16.5283	21.6812	24.1861	24.1115	15.7005	19.2968	26.5308
	Csa7G342770	0.00757106	0.0390724	15.1352	15.7193	12.353	12.2001	14.9091	17.4154	21.8081	22.9137	15.3486	17.8931	17.1795	21.389	19.8533	30.364	20.6993	22.1882	22.4079
	Csa7G414440	0.00795153	0.0405645	8.81872	14.2237	15.5606	13.4672	15.1121	16.5747	10.3797	18.1336	25.146	20.7901	19.8132	24.9766	14.8954	21.8422	27.9919	23.6381	28.4944
	Csa6G314130	1.9e-05	0.000263935	25.0063	23.0905	19.0978	16.8164	20.0036	21.1126	22.0416	24.8334	14.887	19.1463	19.5585	16.5779	19.3243	16.8	11.7307	16.0724	14.2656
	Csa6G434340	2.06e-05	0.000283762	14.9853	15.3199	20.1263	24.0967	25.7555	17.7874	14.2639	10.806	22.2806	25.7427	17.149	18.4488	16.5779	14.4456	20.8274	19.2875	22.493
	Csa2G296120	1.33e-32	5.28e-30	16.3328	19.311	10.3687	8.93195	7.4267	23.8642	26.5282	26.9004	10.3514	12.6671	10.4414	30.529	35.0743	39.2856	16.0549	12.3033	14.5496
	Csa1G195230	0.00215443	0.0144913	27.7359	20.3044	23.1549	20.2801	20.0913	16.9078	18.8281	25.3808	15.3809	17.0741	18.6715	19.9215	15.8116	18.9044	15.2241	14.1222	13.2131
	Csa5G577340	0.00898615	0.0444736	15.58	16.0173	15.4419	17.8505	20.721	18.7098	13.3098	12.6976	24.0532	21.5325	19.3542	23.1865	18.0993	17.1176	21.3299	23.3262	22.812
	Csa2G376840	0.00014724	0.00154619	18.2576	15.2539	12.736	17.5747	17.8725	20.1368	25.3708	26.7522	19.8333	16.9338	15.8882	29.9038	17.2363	24.9791	15.634	13.2202	13.7089
	Csa6G510890	7.92e-07	1.57e-05	12.8857	12.3465	19.6475	20.2748	16.3733	17.8814	14.2286	8.50002	26.9492	20.9975	17.1211	20.5123	16.0227	14.8385	27.9306	29.4741	25.5189
	Csa2G035430	0.000321787	0.00300351	17.663	16.9249	14.9343	16.7675	18.051	20.976	19.3388	18.7404	15.1494	18.1999	19.0579	21.9774	23.6383	26.8395	18.3363	18.1226	16.8574
	Csa7G066270	0.000431963	0.00383121	13.8248	14.4513	23.81	16.3706	21.5798	21.6113	10.6468	7.5134	24.9362	18.6826	17.3102	15.668	19.2008	16.341	27.1073	31.5669	20.9811
	Csa1G058670	0.0028466	0.0181788	18.7618	25.4868	16.3785	18.0627	17.687	20.1399	21.9359	11.8243	17.5537	18.3106	13.0422	18.7473	22.2201	30.0413	18.0306	16.7122	17.7409
	Csa6G118340	0.00954409	0.0465067	20.1559	22.53	17.5458	15.4023	20.6858	20.6722	23.7425	19.4934	16.6129	15.9991	17.9825	15.603	20.8247	19.1737	17.3953	20.1594	18.9212
	Csa3G003480	0.0041282	0.024289	20.8397	20.3971	16.8797	21.7762	22.5414	20.0478	22.962	18.9801	18.5049	15.8839	16.3516	17.7849	18.6161	21.637	17.1721	17.2337	15.7081
	Csa2G432780	1.52e-27	4.6e-25	38.1068	35.2779	13.9036	13.9967	11.4423	26.1252	21.049	35.591	6.88801	8.02169	11.618	23.9805	29.7666	32.434	4.38145	4.43509	6.38762
	Csa3G270270	0.00636821	0.0343912	21.2267	21.6996	18.5672	21.6606	21.0419	19.2109	17.4139	21.485	18.1512	19.9402	20.914	18.5464	20.587	19.2108	16.0448	13.8763	14.6273
	Csa5G152810	0.00383527	0.0228976	23.8423	21.4971	20.6987	22.5722	19.6311	22.811	17.6533	15.214	18.4798	19.6654	16.3595	20.1586	19.822	16.9813	17.2658	16.6452	14.9745
	Csa4G097650	0.00579082	0.0319424	21.9073	17.5342	17.7551	17.2948	17.6151	17.8671	21.076	18.1806	15.0545	17.2956	16.535	17.9523	25.1759	22.539	21.0298	19.6023	19.8775
	Csa2G361550	1.04e-09	4.07e-08	19.4514	21.6902	13.1191	13.8746	14.8803	20.0432	17.5794	22.9519	14.3087	15.029	14.6762	24.9586	25.2206	31.6348	14.9685	20.7379	19.8444
	Csa3G806810	0.00167789	0.0117805	19.6315	19.9061	19.3872	16.0303	17.2035	20.745	22.1576	15.0983	20.1988	15.5415	14.4701	21.0013	23.8564	21.3283	20.4242	19.6482	18.4843
	Csa3G044510	0.00867158	0.0433579	18.7443	16.9384	20.5687	19.5781	19.2272	19.6727	15.6233	13.7056	21.8824	18.984	18.5497	18.8027	18.7199	17.4664	23.9492	23.1171	19.5949
	Csa1G042920	0.00838616	0.0422232	21.1835	19.9119	25.3313	21.4519	19.3879	16.7293	21.3701	23.944	17.3146	15.0385	20.325	19.5832	21.6324	20.3487	16.0893	14.9973	11.0862
	Csa6G452720	1.93e-05	0.000268107	20.0249	18.8942	16.6419	14.1986	16.2255	21.2586	19.0427	22.4789	18.2337	16.8371	16.3764	22.134	23.7041	23.4928	14.5693	21.9711	19.8323
	Csa2G351770	1.14e-17	1.44e-15	14.3001	18.0548	27.4934	28.7559	29.0188	15.6386	11.1209	11.3325	28.4138	25.7869	21.8849	11.4729	13.145	9.82868	19.4244	24.2215	16.4468
	Csa3G728150	0.0001564	0.0016324	19.7351	17.5898	19.9175	16.9959	15.6433	23.0555	21.5344	15.6374	18.0058	17.0445	16.6915	22.5145	24.0454	23.5015	20.1541	18.5597	16.2905
	Csa1G541370	3.88e-15	3.46e-13	12.6035	6.17101	32.8731	21.557	34.2484	14.3451	7.22852	14.5062	27.769	25.3379	29.6366	8.21999	6.02024	6.20702	20.7227	33.223	26.7324
	Csa1G522010	0.000273422	0.00262399	25.3957	23.0976	22.0731	19.9079	18.9124	17.6505	17.2099	22.1808	16.4944	17.1443	16.272	17.4923	22.3799	20.7042	17.4312	17.9938	15.228
	Csa4G228360	0.00067065	0.00556754	24.0205	21.9607	22.3796	22.3992	21.4858	23.8872	19.3106	20.3493	19.6406	19.6216	17.7654	17.5655	17.331	16.8487	16.8262	14.6598	11.6186
	Csa1G077120	3.75e-16	3.89e-14	22.5875	24.5605	14.9911	11.4236	10.6722	21.0494	29.2583	26.7628	12.8965	12.8921	11.0993	32.2985	20.2879	32.4651	15.2641	12.44	17.0409
	Csa2G170820	0.000454679	0.00400105	12.4154	11.1812	21.2546	19.5781	16.5696	16.4376	15.0533	14.8444	22.5649	19.1327	18.6599	24.6081	15.3579	22.3157	27.5828	24.7283	25.7248
	Csa3G894480	4.97e-05	0.000608312	13.6339	15.2987	23.8849	20.2858	32.8231	12.6657	11.3908	24.102	24.4749	21.1897	29.841	11.7789	8.76162	14.3445	20.3884	22.7687	20.6709
	Csa3G912320	0.00934127	0.0457327	10.3163	14.6799	15.1275	13.2808	17.7512	20.0379	14.785	9.79363	23.8526	17.8041	16.7816	17.6067	19.4784	23.9976	34.7044	35.9475	22.3657
	Csa2G416070	0.00199117	0.0135412	30.9406	22.8651	19.1576	28.5833	27.7221	17.6437	16.2562	24.6415	13.3469	17.6762	19.7997	15.7601	19.3998	24.2187	12.06	9.24022	9.1332
	Csa4G003760	0.00624945	0.0338553	22.9639	22.4544	22.5075	19.4036	21.689	19.7052	22.2104	16.4057	18.6378	17.5041	15.9764	17.1613	21.4614	18.2806	18.0689	18.772	15.2608
	Csa4G055450	1.72e-08	5.06e-07	29.856	28.3123	20.381	25.9353	23.8993	24.6963	18.3062	19.053	18.2527	14.6606	16.8263	17.3299	16.4543	16.0278	14.8289	13.0068	11.3146
	Csa4G001910	0.00137202	0.0100319	7.68073	21.2643	20.9628	9.25139	25.4897	14.0299	10.9705	14.6141	22.3263	16.9468	27.5566	9.34253	8.43215	8.83714	23.8491	50.6598	37.3783
	Csa4G003680	1.75e-09	6.47e-08	23.5726	27.543	21.351	18.6359	18.3486	21.2216	23.4812	19.7073	17.3604	16.6367	20.0142	19.7097	21.6733	19.6862	13.6347	14.2521	12.9827
	Csa3G588450	9.35e-10	3.7e-08	21.8258	19.5838	15.2036	15.0615	15.9157	22.2633	18.3906	29.5237	15.8343	15.8511	15.1247	24.9366	25.5561	23.4638	16.5928	19.4287	15.6652
	Csa1G071860	5.31e-09	1.78e-07	3.85288	11.2448	3.99591	2.04602	1.92655	11.6957	25.1097	22.3524	8.46349	12.1381	8.18339	62.4655	46.1728	45.9867	22.6948	14.4753	27.7503
	Csa2G228380	0.00160091	0.0113318	7.02149	14.6699	15.8945	17.5466	21.4302	15.7067	14.1078	21.0065	26.5381	20.1912	21.3426	19.6686	12.2813	20.9377	26.2318	31.9706	24.1003
	Csa1G025050	2.58e-06	4.53e-05	23.693	26.1014	17.685	23.3836	21.3201	24.7582	20.9282	17.9809	19.1483	19.3714	19.9352	21.4732	20.8273	19.1754	11.8094	11.3475	12.3995
	Csa2G370420	0.00916685	0.0451336	14.1678	15.356	16.8021	17.8356	16.6801	21.2746	14.3667	14.6824	22.3283	19.564	19.4479	23.5665	21.1245	19.0929	26.7663	25.169	23.1465
	Csa4G652640	3.77e-09	1.29e-07	7.61095	11.9082	19.7148	15.2314	28.0404	11.8592	8.80782	14.1587	27.1247	20.5405	46.58	11.9814	7.61731	4.49443	21.3279	51.7951	23.224
	Csa7G073440	2.09e-08	6.04e-07	12.4707	14.2151	28.9475	20.5293	31.0318	17.7839	15.0339	9.40527	32.9369	20.2704	19.7566	12.7528	13.147	12.493	22.4188	26.0444	23.0965
	Csa3G043900	0.00155624	0.0110772	10.6155	11.6052	13.8352	12.9655	16.1666	15.56	15.0557	18.8016	22.5299	22.4672	23.5461	25.0088	21.302	22.8819	26.1223	27.9452	26.2265
	Csa1G561410	4.26e-05	0.000532251	15.1388	21.6293	35.0177	17.3051	37.1273	18.7249	15.7984	17.4697	28.8998	19.1168	33.226	6.85004	9.14343	9.04149	13.5105	20.6757	14.1459
	Csa1G523610	0.00014381	0.00151694	14.0451	15.649	20.0954	15.6972	19.7391	19.8624	12.882	13.5011	22.6748	20.9657	18.0044	17.2122	23.0383	16.317	26.9232	31.3173	26.48
	Csa4G091940	0.00308485	0.0193185	10.5995	13.2878	16.12	14.6735	15.1324	20.506	14.3736	16.3813	22.5129	22.8371	21.2774	28.0198	19.8638	19.2812	25.5398	26.5568	27.7549
	Csa2G406110	6.58e-10	2.73e-08	21.1784	23.8846	9.09352	15.32	17.7462	16.9219	24.7428	37.7304	9.9935	12.3097	13.6242	30.2375	25.6942	41.221	11.0287	11.1114	13.151
	Csa4G009890	4.68e-05	0.000577186	23.5026	23.0411	19.3697	22.5744	19.9908	18.9702	19.5916	29.5051	13.4093	13.3101	21.1871	26.3453	19.6495	30.6303	11.2575	9.25992	13.7345
	Csa1G538170	2.54e-16	2.71e-14	5.70622	8.05854	10.0472	13.3543	25.2918	7.88343	9.50614	6.56229	22.8369	26.7103	22.4265	9.46471	10.8656	14.9692	52.7985	36.1582	52.7359
	Csa6G133750	0.00723714	0.0377786	26.7668	20.1773	24.9766	24.0103	22.5127	22.467	18.9519	17.8137	19.3923	16.9557	17.9333	17.4213	20.859	18.2782	17.4669	15.5281	13.9986
	Csa1G256190	0.00112411	0.00850955	13.3788	15.7733	21.1836	16.2196	19.9419	17.8002	12.1389	12.843	21.7244	19.8562	21.4402	21.3504	22.0632	23.8849	25.9336	27.6314	22.4648
	Csa6G013900	2.62e-08	7.37e-07	25.5011	19.8075	9.8172	15.8386	14.3699	21.7592	20.1217	29.9349	10.5033	16.4031	10.8561	36.1454	20.9622	53.1348	5.79239	11.6423	13.1862
	Csa6G046300	0.000259081	0.00250782	9.60487	11.287	13.1828	18.6143	20.8127	11.4155	16.5743	19.7039	24.2254	24.784	21.1581	17.2291	19.3789	23.0423	25.1032	29.6409	30.8214
	Csa2G361500	0.000127173	0.00137242	23.8539	23.4365	21.5396	20.4966	21.134	20.0637	21.1504	22.523	16.5669	17.1061	17.6516	17.1378	22.1201	19.6137	18.3161	18.9045	15.136
	Csa3G141840	1.13e-10	5.28e-09	25.5132	24.464	15.1808	12.9173	13.8434	18.2689	25.1657	22.34	12.9232	10.8455	11.5774	21.1876	26.9439	35.6138	21.6259	19.4237	19.219
	Csa3G142980	0.000361546	0.00328927	18.9465	19.4796	16.9507	17.8728	15.7756	19.8697	20.0798	20.2084	17.7398	17.8569	19.3522	24.2839	21.8094	25.2486	18.3822	21.8617	21.7951
	Csa6G509710	0.00231315	0.0153852	18.2304	19.8677	21.9171	24.3862	28.0551	20.2985	18.8131	10.0448	23.4963	26.6357	20.1919	16.3012	17.5688	11.7534	19.6284	19.7479	21.0906
	Csa6G498950	0.00130784	0.00963278	20.2046	20.7336	17.7498	18.2777	15.706	18.3831	23.0128	24.7119	16.2127	18.7782	20.8642	21.4779	19.9445	26.1653	17.6667	18.8169	19.7681
	Csa2G005290	9.31e-05	0.00104817	9.33047	13.53	16.9769	19.0852	26.8953	15.7698	15.8629	14.6353	24.7659	26.8608	15.3835	20.465	18.6827	14.6819	30.4727	23.1979	32.2077
	Csa3G002750	0.00499374	0.0284171	9.42945	10.9306	13.9443	10.7955	14.8586	18.8856	24.9879	20.6209	12.4807	13.8133	13.3922	28.6086	32.9373	45.7715	19.6968	25.4943	22.6487
	Csa4G047340	9.8e-05	0.00109884	18.2476	19.0181	16.4983	16.0379	13.702	21.3492	19.3173	18.9926	22.2279	16.6469	17.6618	23.9728	27.9069	24.9667	24.6287	19.0581	19.2501
	Csa5G630970	6.94e-08	1.78e-06	19.2107	19.6934	31.7145	34.0853	38.5519	15.5198	15.9286	13.7317	22.3156	21.4945	25.3516	9.38282	14.5736	10.1775	16.7373	17.5113	13.8218
	Csa5G613590	0.0026996	0.0174212	14.4389	15.0918	10.6086	17.0649	15.7348	21.1194	20.2119	15.8615	18.0898	20.1289	14.2612	33.1604	27.0493	50.4843	12.929	15.2695	19.1552
	Csa4G280480	6.96e-05	0.000817679	26.1682	22.9841	19.5503	18.2316	17.7496	21.9565	21.7912	24.708	18.2191	15.4481	17.8503	18.8379	21.3133	19.9623	23.4623	16.6086	16.0605
	Csa4G296190	0.0010945	0.0083185	22.705	23.6268	18.3447	19.6206	19.2492	17.9017	18.9565	23.6329	17.1733	18.0862	19.5048	21.386	19.4698	24.1088	19.9614	18.9595	18.4882
	Csa7G448860	5.51e-12	3.18e-10	10.0767	10.9511	16.6368	17.5439	19.3776	19.2751	10.2956	10.5854	31.8167	26.5831	21.3355	20.2357	18.0165	18.5215	29.0522	33.0165	28.252
	Csa6G487700	7.26e-07	1.45e-05	15.3914	18.3462	26.4083	23.8405	29.5723	17.9317	19.751	15.7643	22.6676	23.6475	22.137	12.6626	14.0518	13.7209	19.6714	24.7389	21.8417
	Csa2G059760	0.00697552	0.036755	16.5514	16.5021	21.6938	19.0422	18.7791	21.901	17.9194	8.93449	28.2031	20.6838	17.8289	19.2993	19.3337	16.3417	27.2283	28.9547	23.2248
	Csa6G519480	2.55e-06	4.49e-05	25.8975	24.0769	22.195	22.0642	18.2349	21.5884	17.8453	21.4727	18.4056	17.4839	18.1961	23.5894	21.8292	20.3335	20.0424	14.7387	14.5461
	Csa2G361680	0.00326302	0.0201864	21.9606	21.564	17.7227	21.8941	22.2221	20.9531	18.6292	23.3388	19.5632	20.6439	21.9684	21.7586	19.5173	23.5939	15.544	16.3066	15.64
	Csa3G035870	0.000396083	0.00355766	17.9055	19.3158	16.536	15.1867	18.2453	20.2868	23.1954	22.9046	19.7531	16.7229	19.5501	22.0436	23.7389	27.3696	18.863	22.9457	19.001
	Csa7G448680	1.21e-05	0.000176106	16.6859	12.5188	8.62603	10.742	11.5252	22.689	26.9476	37.2317	11.6092	19.376	20.2199	39.7451	25.0364	37.3789	7.38377	13.2753	22.7596
	Csa1G600860	3.03e-05	0.000396527	21.3322	22.8747	21.4642	19.1393	18.7013	20.6852	20.6392	24.0964	17.1283	15.8873	18.5798	20.2487	24.4813	22.3083	19.0523	18.0237	19.1401
	Csa5G603260	0.000170497	0.0017489	24.6913	25.0585	19.3476	22.3842	19.3035	18.3821	20.5908	26.4774	16.6961	17.0967	17.8862	18.0643	20.1827	25.4012	19.3795	17.4413	15.7473
	Csa1G064760	0.000397733	0.00357079	17.0335	16.9349	13.633	19.0256	15.5147	20.7662	22.6135	31.3579	18.0403	21.564	18.6007	26.9939	20.6009	39.2934	12.2288	13.4386	16.5175
	Csa3G118740	5.6e-05	0.000676826	12.8916	12.6755	28.5378	14.4616	22.0386	16.4762	13.9234	19.4635	28.4039	15.7427	30.26	14.2239	13.1555	17.3471	24.838	36.2481	24.003
	Csa2G347100	5.82e-11	2.88e-09	24.768	24.0786	12.1857	20.477	18.3624	31.7645	26.5645	31.4973	20.7492	19.9952	18.0489	26.1329	17.0494	23.0677	10.2927	11.7883	8.26207
	Csa3G159440	0.00380734	0.0227807	22.7527	19.3418	20.8411	20.0866	23.0138	20.7357	19.3311	19.1558	17.4945	17.2397	16.5812	20.9242	24.9688	25.2487	23.6657	16.7824	17.1361
	Csa4G622770	7.29e-11	3.53e-09	25.0526	28.6661	15.5526	17.4435	22.4951	29.3708	25.8811	18.7115	15.8087	17.0471	17.3278	24.5593	25.9302	25.6268	10.2449	15.0909	10.5234
	Csa3G175700	0.0019763	0.0134641	14.6405	16.9434	23.6742	20.1462	23.0216	24.3603	18.2749	12.5437	26.6176	21.1202	19.8686	20.5556	17.879	13.0003	24.6449	26.7197	21.7836
	Csa4G001950	9.3e-08	2.32e-06	17.9541	22.5961	10.6976	8.67703	10.9707	27.6532	24.4091	11.9832	16.1397	12.3038	13.6471	33.1655	32.0404	30.537	24.2597	25.7018	23.2243
	Csa6G526450	0.0040953	0.0241177	9.90897	11.3745	16.0715	13.4388	14.9157	21.3638	18.1302	9.4261	25.2377	20.2192	16.0264	21.6926	24.6846	22.7707	32.5703	39.5749	28.744
	Csa3G854240	7.76e-11	3.73e-09	25.2922	22.9861	16.2228	12.6749	15.9038	23.7773	25.2151	35.6798	14.7461	15.1818	18.2176	21.7752	25.6245	26.0585	13.4178	18.7805	15.5562
	Csa4G419580	4.81e-07	1.01e-05	22.4364	22.7837	17.5277	16.3459	16.6144	20.9428	23.9108	34.4978	17.2882	17.1484	17.6386	19.7688	24.2055	24.9934	16.9434	18.3871	16.0017
	Csa1G004080	0.00679606	0.0360653	18.8961	20.5357	21.4048	25.3489	22.1861	25.2239	9.89598	9.02974	27.9475	21.6814	19.4653	20.0219	18.4335	11.5607	30.1646	24.5645	21.1791
	Csa7G290540	5.37e-12	3.11e-10	24.3935	23.1762	16.9414	18.7624	18.0336	23.7006	24.4752	25.274	19.009	16.7432	17.3705	26.3387	19.2795	23.5994	18.2981	15.4633	16.8082
	Csa5G139180	0.000137191	0.00146233	16.0832	15.3079	20.6107	21.0515	22.1732	22.6808	15.6672	9.27356	25.6463	26.8571	21.8948	21.8753	18.4538	13.4044	25.1834	25.9365	25.976
	Csa1G716250	2.64e-12	1.58e-10	23.4394	20.0117	17.9707	16.661	14.7935	24.7859	21.7754	21.2055	18.0623	16.9745	14.0293	29.0327	28.3866	22.0757	21.6372	20.1623	17.9038
	Csa1G573680	2.91e-07	6.41e-06	23.5045	22.1153	19.0453	17.0166	18.8315	25.8497	18.2267	29.2853	17.419	13.8361	19.0822	25.489	21.1055	30.1822	15.425	18.3066	14.2855
	Csa3G167380	0.00533142	0.029919	19.891	25.6525	35.5781	28.4204	33.048	10.8876	10.6496	26.7772	20.1646	32.2337	31.4244	8.65499	10.5754	11.8846	14.9973	13.4427	14.8382
	Csa5G179780	0.000291745	0.00276368	20.8713	21.1674	20.1151	15.8464	16.8541	22.0892	20.4373	17.7083	19.9135	17.9563	18.2824	25.4498	23.3678	25.1568	19.429	24.466	20.5157
	Csa6G487610	0.00652026	0.0349746	20.6064	18.9889	17.8739	19.5344	17.9417	20.1061	19.7809	27.4585	17.3558	19.6356	21.7946	23.8343	19.8874	27.5918	19.0124	18.2916	20.246
	Csa6G426930	0.00733984	0.0381164	23.2453	19.0147	24.0214	24.2485	19.9296	20.443	15.9303	12.8778	25.0303	21.8798	17.6817	16.6794	20.1969	16.0502	25.0132	23.0274	25.256
	Csa3G135700	0.00022419	0.00222544	15.8025	17.9737	21.1363	20.19	20.2653	19.1568	18.8384	15.383	21.7983	22.6841	19.2846	18.4077	20.0461	18.4384	25.0966	28.2413	27.9782
	Csa4G026910	0.000747365	0.00606189	20.9885	16.4632	22.2162	24.3666	23.0927	22.5649	14.3994	12.0853	25.6537	22.96	17.9637	15.0614	19.0909	18.6489	26.5568	25.4884	23.2234
	Csa4G052720	4.09e-24	9.51e-22	28.8805	24.0247	10.8201	9.5746	7.43093	20.6149	21.1753	43.093	8.27102	8.65577	10.8562	36.7802	33.9707	50.1436	14.3372	10.8444	11.8039
	Csa7G447720	0.00108875	0.00828139	25.9154	22.4692	19.9806	24.0964	18.9187	21.7127	17.56	18.9711	19.7223	19.0461	19.1622	22.6467	23.3966	20.5369	20.0824	17.4397	19.6992
	Csa3G625650	2.84e-05	0.000375377	13.2929	17.4155	19.859	19.4179	24.7768	18.5316	16.0991	12.0178	25.8034	26.6493	21.3025	22.4779	17.0029	18.8685	22.0542	27.0652	28.7607
	Csa7G041330	9.75e-09	3.03e-07	47.2977	24.5704	21.113	19.2158	10.8865	20.4443	26.8407	29.9191	7.95073	17.1324	16.2899	21.5702	41.1543	18.7998	7.30316	9.20917	11.9442
	Csa6G008850	0.000441196	0.00390221	22.5266	23.5353	17.4474	20.099	19.4478	18.0956	23.7128	30.0817	17.7413	16.1216	19.0249	21.0631	20.0234	27.4831	20.1325	19.3753	17.0351
	Csa6G077400	1.74e-23	3.82e-21	27.6461	27.4028	16.9701	16.9327	16.1636	25.9013	27.6033	29.6832	14.7748	15.3667	19.7787	25.2314	22.9238	26.4216	13.8581	13.2129	13.5783
	Csa3G736960	2.03e-06	3.66e-05	20.7182	21.7079	19.2264	15.501	16.1063	21.8845	23.5691	22.2348	19.5752	21.9194	18.2566	24.5659	25.2567	22.1636	21.2561	20.0404	20.3234
	Csa3G184580	4.7e-14	3.57e-12	27.7615	32.2888	20.2348	14.3755	15.3153	24.4983	30.7691	18.7358	14.404	14.6689	13.6347	20.2965	28.3602	32.0797	16.5658	15.3287	15.064
	Csa4G651860	0.00035079	0.00322995	12.6705	17.6308	20.1103	16.1557	21.12	23.6597	17.1405	12.7628	28.7742	23.4829	21.3292	21.549	14.1141	15.5282	25.9077	29.598	33.0661
	Csa5G387970	0.00104745	0.00804201	13.0691	15.5939	17.2112	17.7587	17.9671	19.5193	14.9203	11.7553	26.428	19.9184	17.2839	26.3507	22.8889	22.402	35.8553	27.1687	30.4776
	Csa3G150100	0.000505337	0.00436268	18.38	19.2844	20.4525	16.833	19.2279	21.8824	29.1018	23.1615	19.7791	21.4346	20.3122	28.2755	21.4471	26.8503	15.9738	16.5171	18.1819
	Csa3G740240	0.00193533	0.0132228	22.468	19.9537	19.1531	24.3703	21.71	20.284	19.3578	26.809	18.3768	18.5917	18.1371	24.0618	23.6046	26.7722	17.6199	19.9674	16.2476
	Csa2G361450	1.13e-06	2.18e-05	22.8831	26.2153	18.352	17.993	17.7454	21.4425	26.9281	24.5359	17.733	20.0196	17.7131	22.658	24.2813	21.0952	18.872	17.3331	21.7357
	Csa1G042520	2.54e-09	9.14e-08	12.0495	15.2476	22.3475	20.1734	22.6132	20.6834	11.9146	9.50863	30.5495	23.3921	20.2591	18.8681	17.4966	14.2165	28.7977	39.0576	30.5795
	Csa5G157250	0.00661989	0.0353797	17.8549	20.7185	17.1556	16.4119	18.109	21.0542	19.8823	28.8706	19.8469	19.8406	20.8049	23.684	21.0115	28.7686	21.3404	21.3223	21.5059
	Csa4G011670	0.000375688	0.00340332	14.8039	18.663	20.5908	18.7445	21.554	20.0556	19.1337	14.8419	26.5235	23.4297	18.8012	18.8952	20.6589	18.8284	26.3462	30.2731	26.5334
	CsaUNG000010	0.00853848	0.0428136	28.928	22.1046	25.7184	25.9382	23.6141	23.0543	21.152	18.6337	18.132	19.9869	19.6125	18.4318	24.8713	18.0968	17.1163	18.4121	15.0622
	Csa2G171840	9.7e-10	3.81e-08	32.0331	25.1665	19.7864	24.5279	22.0237	23.6824	24.3192	25.2225	14.6118	18.159	18.2517	20.3425	21.8497	25.1206	16.2477	13.8358	13.9638
	Csa6G495810	0.00667679	0.0356338	5.77046	9.58886	19.2603	9.19295	14.9162	24.3558	16.447	25.1078	23.6972	20.908	32.7097	24.7644	13.3963	20.6486	26.3685	42.4496	30.622
	Csa1G524650	1.73e-05	0.000242881	27.7029	22.5499	22.5133	20.9541	19.5369	20.1961	23.444	31.1647	16.8462	17.4007	21.3494	22.861	23.1864	21.2051	17.3118	17.4018	14.6974
	Csa3G567830	7.75e-13	4.94e-11	28.4129	29.4365	19.9439	16.8321	17.6383	25.2047	21.6701	40.0909	13.1139	13.471	18.2203	23.7971	23.9033	28.9515	13.7393	13.6077	12.7668
	Csa7G391240	1.24e-81	3.94e-78	22.1437	22.3872	9.37321	7.81702	7.76013	33.4203	29.9672	26.6828	7.80636	9.26541	9.2644	46.8252	39.7913	42.8546	15.8508	15.3933	14.9469
	Csa5G652250	4.63e-06	7.56e-05	10.6685	14.0417	15.1219	17.3676	21.436	20.3202	12.3261	14.9152	27.0129	29.5823	23.8605	25.4661	19.2415	20.8138	26.438	29.6989	33.3319
	Csa1G044880	8.63e-20	1.36e-17	38.2022	47.3427	15.7915	17.9889	23.6078	37.3149	43.7193	49.3943	14.767	12.2085	19.8561	9.30914	13.9025	6.92385	4.49919	3.97544	2.95451
	Csa1G057060	3.39e-08	9.3e-07	11.019	12.8247	16.5572	17.9563	20.6972	20.9017	10.5778	9.95836	29.9674	25.1921	23.1606	22.537	18.4005	23.2577	32.9582	35.7386	30.1702
	Csa1G015080	3.43e-11	1.74e-09	15.9659	18.6073	22.2922	26.2921	28.5623	20.3438	14.7123	16.8481	26.2899	27.1943	23.4829	15.7806	17.445	14.2155	22.4943	25.0539	26.3468
	Csa6G108440	0.00561737	0.0312023	12.4865	25.3602	22.575	14.336	24.3292	21.677	19.0353	16.2797	31.9099	17.8568	26.3807	14.6613	11.8891	14.4989	27.2499	29.9722	31.7167
	Csa2G176690	1.95e-13	1.35e-11	2.41537	6.73345	39.3802	8.33721	62.6613	1.63158	2.65985	3.94108	42.9954	40.8104	72.815	0.552987	1.22421	0.29153	14.6588	48.9426	12.1757
	Csa5G152890	0.000161243	0.00167179	23.2705	22.0858	22.117	19.4448	21.7419	22.9453	28.3145	21.552	18.5818	19.2945	18.2011	20.591	23.4759	25.3334	16.3456	20.5333	19.1049
	Csa5G608370	0.000117145	0.00128087	16.4833	18.9793	14.7069	15.7863	15.8773	23.7473	28.924	22.1565	18.9793	21.5305	17.7304	27.6544	27.172	29.8142	18.0989	18.9906	27.2181
	Csa2G270810	1.29e-07	3.09e-06	28.8575	24.1371	18.0735	20.3232	19.2491	23.5725	20.7502	28.8635	18.9916	18.8598	21.4332	21.1039	23.9942	23.6027	17.431	18.9381	15.7102
	Csa3G036530	0.000303906	0.00285899	22.3273	20.7759	23.1627	25.9801	22.3978	18.6047	14.1888	10.6296	23.7952	20.8449	17.9354	21.4645	19.3704	14.1024	33.2569	27.7855	28.0253
	Csa5G606770	0.000299928	0.00283135	13.7701	15.1048	12.6277	10.8873	14.1921	20.2111	24.6594	19.7764	16.4853	18.4595	15.9617	29.5923	36.0977	38.2929	20.0769	29.8232	28.9949
	Csa7G075020	0.0031206	0.0195104	18.9665	16.3436	15.5368	14.6413	17.6982	20.288	23.7715	35.9635	19.8172	22.1997	20.055	25.4142	27.6197	27.8404	13.9042	22.7601	22.7166
	Csa3G154400	8.05e-05	0.000929152	25.7798	29.0568	22.8306	20.6952	23.8286	20.1904	23.9466	27.3611	20.3483	15.4266	18.6039	17.1603	24.3787	23.3524	18.0117	17.4493	17.1533
	Csa5G175970	4.05e-07	8.62e-06	12.7266	17.274	22.643	17.6263	23.6437	21.5135	11.9879	11.9396	37.3652	23.2044	21.3764	13.3347	18.4716	14.7241	35.5663	38.3973	24.4541
	Csa3G881710	0.0071587	0.0374717	25.8613	24.0802	23.2538	26.0932	22.7787	22.4454	19.7308	27.5971	20.4318	20.3812	26.8418	22.2957	21.0569	20.1283	16.4124	12.6257	14.6547
	Csa3G872100	0.000264376	0.00255131	24.9738	22.8313	21.5201	21.4595	18.628	20.7055	20.6359	24.9758	19.1407	19.0438	21.8974	22.4346	25.0515	23.568	21.3805	20.6032	17.8336
	Csa3G730160	7.44e-07	1.49e-05	7.19854	3.551	12.8627	9.63671	18.0102	18.0532	14.003	23.1925	32.9311	22.3255	30.3003	13.532	12.3088	6.36886	29.6999	67.9934	45.0474
	Csa4G009880	1.37e-08	4.11e-07	25.6859	24.1868	17.4558	17.8079	17.9056	20.6496	25.0767	31.045	17.0151	15.6261	21.075	27.443	29.779	25.1463	19.0247	14.0495	18.0739
	Csa1G538210	7.51e-19	1.05e-16	25.6296	25.5566	15.9184	11.6075	13.7731	22.5522	27.8356	32.4169	15.6441	13.3569	17.776	33.1743	27.5458	35.1518	17.0076	16.0739	16.0939
	Csa2G296010	0.00139045	0.0101278	20.2365	26.1265	20.3009	20.883	22.7111	26.5482	20.1657	24.7135	23.0611	22.9653	22.2652	19.9078	22.4096	21.0794	18.1642	18.8991	16.7636
	Csa4G642330	0.00186198	0.0128161	24.4298	23.85	25.0536	21.9072	21.3776	19.8459	19.2419	22.9776	20.5066	17.1173	20.2103	23.5171	24.5201	23.809	22.8308	18.8752	17.2548
	Csa4G647990	0.00726453	0.0378594	17.9554	18.2503	21.0271	19.1093	21.3664	23.3568	19.0556	12.0932	28.076	22.8798	19.2469	21.5774	21.6844	17.7309	29.7513	27.6692	27.2978
	Csa1G703570	5.93e-11	2.92e-09	13.1307	11.2844	23.8813	20.3993	28.6212	13.3361	12.3709	11.9128	25.7176	27.8612	28.2386	17.227	10.7993	20.1646	23.0957	34.452	45.65
	Csa5G576630	5.03e-05	0.000614252	32.7399	27.0365	24.7083	27.263	20.5029	20.2133	22.4634	36.2167	19.3088	18.1457	24.7835	20.5034	19.8937	19.9376	14.0007	11.1063	10.0801
	Csa5G624430	0.00650716	0.0349358	14.5878	16.048	18.0072	14.3149	17.4484	18.6533	16.081	16.354	29.4494	25.9541	21.6069	27.3958	23.1934	23.6482	30.2825	26.4815	29.4604
	Csa5G381780	0.00159769	0.0113132	18.2051	19.8715	22.9639	22.8472	25.9702	21.6554	20.1884	10.9113	24.7079	25.1918	17.7877	14.9526	20.5969	17.5785	27.9705	30.2491	27.6181
	Csa2G406130	0.00727437	0.0378795	18.8638	20.5045	15.9494	17.8066	20.7757	25.7921	20.7302	20.85	21.6087	17.8213	19.9567	25.406	26.7369	28.5422	25.7234	26.9686	15.2869
	Csa6G092550	0.000831769	0.00662808	20.5439	30.1158	18.5068	15.433	21.6813	26.4762	31.4915	21.6171	18.8555	17.4139	19.6338	19.1335	19.0611	30.679	15.1825	21.269	22.2343
	Csa5G148810	3.64e-06	6.14e-05	26.5475	21.5222	21.0571	19.9806	16.6361	20.8022	24.7306	31.5975	18.5666	20.7568	21.1399	26.2669	24.1312	25.3615	15.7739	18.8296	16.4622
	Csa1G423100	0.000167069	0.00172114	28.1823	25.1951	16.6188	24.6942	27.8238	21.7996	26.3775	22.583	17.7204	23.548	19.3384	23.5326	22.5388	28.5465	12.7042	13.4806	16.1398
	Csa7G017680	0.000746489	0.00605792	22.4657	21.874	19.0279	15.6441	19.216	20.3931	21.7914	24.1302	19.8046	20.7476	20.8674	23.1614	26.9839	26.2714	23.389	22.5792	22.602
	Csa1G569330	0.00140463	0.0102154	16.8254	19.4188	19.0227	25.3359	24.0396	17.5759	12.1474	16.5361	22.5461	27.9431	28.0045	23.7809	18.8988	22.3665	24.1552	22.6161	29.927
	Csa6G319780	4.75e-08	1.26e-06	25.3533	26.4482	19.8588	22.5333	18.1478	23.6333	21.7848	23.7259	17.0145	18.6634	16.8064	25.8339	25.3368	24.2525	24.2886	17.1031	21.0436
	Csa3G135110	2.23e-05	0.000305269	12.2874	17.3224	20.7468	16.8771	15.6055	20.1648	11.9626	13.6298	25.6902	24.2737	22.9475	25.6069	21.6626	23.0331	35.2544	32.6459	32.2056
	Csa3G129710	0.00687431	0.0363523	20.3252	21.7037	19.1163	16.4741	16.0707	23.5251	18.5383	31.6899	18.5466	21.5718	25.0709	23.5524	23.5672	28.2441	19.0907	23.7707	21.0906
	Csa2G011590	1.16e-13	8.3e-12	26.1216	24.7917	21.0524	19.9459	18.1235	27.8837	23.2341	25.1087	17.5095	17.9861	19.1346	26.8402	23.0754	29.5912	17.4745	17.7007	17.0341
	Csa7G009710	1.22e-21	2.26e-19	23.2166	29.8785	15.1011	13.2197	15.8734	26.5158	29.1579	24.552	16.7843	13.5454	15.475	28.877	31.1304	30.9875	18.8045	19.8059	19.8521
	Csa4G308480	1.36e-05	0.000195929	3.1001	5.55471	8.78645	3.65133	10.5003	21.7406	17.2859	17.6162	43.4376	33.6908	37.7378	18.7569	23.9583	22.8919	31.2087	45.4157	27.9956
	Csa3G895790	7.87e-06	0.0001213	18.8873	22.3173	18.7344	18.2832	19.4545	26.2042	20.1397	21.9148	21.3663	20.7809	21.3195	25.9527	27.183	27.7534	21.6641	21.0865	20.2928
	Csa6G410660	0.003029	0.0190439	19.9934	17.4881	19.3246	18.4697	16.0025	25.1821	21.5582	22.0237	20.7731	22.5171	20.2223	29.5778	27.2474	23.1105	22.5445	24.7375	23.1554
	Csa6G088710	1.03e-07	2.53e-06	37.7465	55.5451	15.7533	13.5611	22.2104	51.3714	71.3555	34.8975	18.0704	9.7073	12.7886	7.48142	11.219	3.36836	5.58693	2.15715	1.20238
	Csa4G075200	1.21e-41	1e-38	4.72625	4.08977	15.7002	19.8792	19.9785	7.16218	3.75671	7.22473	29.9409	45.0355	27.2667	15.2517	8.71997	9.38069	46.74	47.9724	61.224
	Csa6G518920	1.51e-06	2.84e-05	22.078	22.4074	19.2081	18.6385	15.3057	20.0775	26.0035	26.0111	20.6583	18.265	21.386	31.2898	27.912	30.3556	18.1848	16.1015	21.1496
	Csa6G490960	0.00115355	0.0086945	34.9094	31.8983	28.5662	26.8445	26.9103	22.7649	23.1189	31.691	18.9009	18.9731	22.8217	13.4075	21.6919	15.1035	17.5803	11.3664	8.87063
	Csa4G011750	0.00395719	0.0235076	19.7745	20.2058	21.4777	21.8071	28.6545	21.8503	19.7438	14.7342	27.2442	21.0222	21.2199	16.8941	20.5162	17.7926	29.7784	31.7291	21.2377
	Csa1G433110	1.62e-19	2.45e-17	20.036	24.9087	13.6289	13.8997	14.4666	25.0335	22.1412	26.3089	16.8167	14.9411	17.3473	31.0354	31.8889	38.9955	22.7881	20.5233	20.9754
	Csa3G135000	0.00132055	0.00972264	18.5049	11.5293	17.7921	24.9178	27.5723	14.4445	15.0765	21.241	28.7447	28.1725	26.6511	22.9986	14.6492	23.9942	22.6172	27.6047	29.3762
	Csa6G494950	0.00413729	0.02432	7.77391	16.6748	16.2058	14.6344	20.9058	22.277	14.9521	13.9357	26.479	19.625	19.7319	23.4544	23.3934	27.6027	34.8884	37.4286	36.3692
	Csa1G042220	3.38e-10	1.46e-08	41.2506	38.9981	15.8985	19.3983	27.0387	22.6791	29.3117	35.7235	12.9	15.1269	18.6202	14.2905	25.0216	27.6526	8.77238	13.3586	11.945
	Csa2G379290	0.000996505	0.00771199	26.1432	24.8104	22.9303	22.7059	18.6941	18.2388	20.2292	25.6196	19.2743	17.5448	20.4678	25.1004	24.5806	27.4152	24.3723	20.3955	20.0548
	Csa5G609660	0.000325774	0.00302885	18.3952	22.2515	26.9825	22.9166	19.2015	20.7295	18.7159	16.9941	26.9308	25.0174	27.4406	19.2145	20.2199	17.0466	28.6914	23.4528	24.6885
	Csa3G625620	0.00794666	0.0405645	30.478	21.7458	25.7508	24.9052	22.5352	26.9772	21.3194	25.989	17.3687	20.8719	22.8419	22.0562	22.5853	19.2176	23.1686	15.7431	15.3833
[truncated: 1,429 more rows]
